# Supplementary material
Source: PubMed Central journal article supplement (PMC3801079)
Supplement: 1316009110_sapp.pdf [file 1316009110_sapp.pdf]

## Supplemental Information (SI)

### Epigenomic Programming Contributes to the Genomic Drift Evolution of the F-Box

#### Protein Superfamily in *Arabidopsis*

Zhihua Hua, John E. Pool, Robert J. Schmitz, Matthew D. Schultz, Shin-han Shiu,

Joseph R. Ecker, and Richard D. Vierstra

## Materials and Methods

**Coordinate Mapping of *FBX* Genes in the Col-0 Reference Genome.** The coding sequences (CDSs) of 897 *Arabidopsis thaliana* *FBX* genes described previously (1) were aligned with two versions of the Col-0 reference genome sequence, TAIR Version 7 and TAIR Version 10, using BLAT (2). Based on BLAT results, the coordinates for each *FBX* coding region (CR, including exonic and intronic regions) sequence, exonic sequences, and intronic sequences were obtained. If the coordinate of the middle nucleotide [ $1/2(\text{Position}_{\text{start}} - \text{Position}_{\text{end}})$ ] of an *FBX* CR sequence was within the position range of another *FBX* CR sequence, the two *FBX* sequences were further compared and the redundant locus was removed. In total, 869 and 877 previously annotated *FBX* genes had unique loci in TAIR Version 7 and TAIR Version 10, respectively. For each unique *FBX* locus, the coordinates of four regions, 1-kb upstream the start codon (UP), CR, coding sequence (CDS), and 1-kb downstream the stop codon (DN) (Fig. S5A) were then obtained from TAIR Version 7 (for methylation analysis) and TAIR Version 10 (for single nucleotide polymorphism (SNP) analysis). Common, Lineage-Specific, and Pseudo *FBX* genes were retrieved from (1). Syntenic and nonsyntenic *FBX* genes were determined based on their presence and absence, respectively, in the syntenic blocks shared between *A. thaliana* and *A. lyrata*, which were retrieved from (3).

**Frequency Calculation of Methylated *FBX* Genes.** Based on the range (0 to 0.325 segregating sites per nucleotide) of *FBX* coding sequence SNP levels, 11 intervals, which represent increasing ranges of SNP values, were evenly split from low to high: 1,  $0 \leq x < 0.032$ ; 2,  $0.032 \leq x < 0.065$ ; 3,  $0.065 \leq x < 0.097$ ; 4,  $0.097 \leq x < 0.130$ ; 5,  $0.130 \leq x < 0.162$ ; 6,  $0.162 \leq x < 0.195$ ; 7,  $0.195 \leq x < 0.227$ ; 8,  $0.227 \leq x < 0.260$ ; 9,  $0.260 \leq x < 0.292$ ; 10,  $0.292 \leq x < 0.325$ ; 11,  $0.325 \leq x < 0.357$  (where  $x$  denotes the value of segregating sites per nucleotide of an *FBX* coding sequence). The number of *FBX* genes within each interval was counted for Common, Specific, and Pseudo groups. The fractions of Common, Specific, and Pseudo genes that are methylated at CG, CHG, or CHH positions were subsequently calculated and plotted in accordance with the increase of their SNP levels in each interval.

**Minor Allele Frequency Analysis and Generalized McDonald-Kreitman Test.** Compared to the Col-0 reference sequence, minor allele frequencies (MAFs) of non-synonymous ( $n$ ) or synonymous ( $s$ ) alleles in each segregating site of an *FBX* CDS were calculated using its aligned sequences, obtained from the Col-0 reference genome and the newly assembled sequences from 431 additional accessions. To simplify the frequency calculation, we defined a mutation as a non-synonymous allele if the corresponding codon encodes an amino acid different to that in the Col-0 reference sequence.

To determine divergent ( $D$ ) mutations of an *A. thaliana* *FBX* gene, the coding sequence of its *Arabidopsis lyrata* orthologous CDS was retrieved from our previous analysis (1) and aligned as an out-group sequence to calculate the number of non-synonymous and synonymous divergent mutations ( $Dn$  and  $Ds$ ) using the method described in (4). The number of non-synonymous and synonymous mutations from rare ( $Pn_{MAF < 5\%}$ ,  $Ps_{MAF < 5\%}$ ) and common ( $Pn_{MAF \geq 5\%}$ ,  $Ps_{MAF \geq 5\%}$ ) polymorphic alleles were counted by masking the alleles with  $MAF \geq 5\%$  or  $MAF < 5\%$ , respectively, in the aligned 432 in-group sequences using the method described in (4).

Since mutations with  $MAF \geq 5\%$  are common and nearly neutral (5-7), an excess of rare non-synonymous polymorphisms (due to deleterious mutations) was indicated if  $Pn_{MAF < 5\%} / Ps_{MAF < 5\%} \gg Pn_{MAF \geq 5\%} / Ps_{MAF \geq 5\%}$  (Fisher's exact test) (6). To remove the recently deleterious mutations that are not subject to neutral changes, we first calculated the neutral frequency of non-synonymous mutations in an *FBX* gene with  $f_{neutral} = Pn_{MAF \geq 5\%} / Ps_{MAF \geq 5\%}$  by considering that polymorphic mutations with  $MAF \geq 5\%$  are nearly neutral. Therefore, the total number of non-synonymous mutations that are under neutral changes was calculated with  $Pn = f_{neutral} \times Ps_{MAF < 5\%} + f_{neutral} \times Ps_{MAF \geq 5\%}$ . To assess whether non-synonymous mutations favor polymorphic neutral changes or divergent selection,  $\alpha$  was calculated by  $\alpha = 1 - (Pn/Ps)(Ds/Dn)$ , wherein  $Ps = Ps_{MAF < 5\%} + Ps_{MAF \geq 5\%}$ . A Fisher's exact test was applied to determine whether  $\alpha \gg 0$  (relaxed selection) or  $\alpha \ll 0$  (adaptive selection) in an *FBX* gene.

**Bayesian Multivariate Linear Regression Modeling.** The expected expression level of each *FBX* gene was predicted using a multivariate linear regression model:

$$y_i = z_1 b_1 x_{i,1} + \dots + z_j b_j x_{i,j} + \dots + z_p b_p x_{i,p} + \varepsilon_i$$

where  $y_i$  denotes the expected expression level,  $z_i$  is a uniformly distributed random number indicating the presence ( $z_i = 1$ ) or absence ( $z_i = 0$ ) of each parameter,  $z_j b_j$  represents the regression coefficient of each parameter,  $x_{i,j}$  is the observed value of each genomic/epigenomic variant, and  $\varepsilon_i$  indicates each sampling variability that is conditionally independent and identically distributed from a normal distribution ( $0, \sigma^2$ ). The observed expression data were normalized to fit an approximately normal distribution (0,1) for Bayesian analysis through a logarithmic transformation. In total, 58 genomic/epigenomic variants ( $p$ ) were obtained to estimate their effects on the expression of an *FBX* gene (Table S1). Gibbs sampling (8) was used to calculate the posterior probability ( $PP$ ) of a parameter ( $p$ ) that actively affects *FBX* gene

expression. The mean expected expression value of each *FBX* gene was calculated using the mean regression coefficients averaged from 10,000X Gibbs sampling.

## References

1. Hua Z, Zou C, Shiu SH, & Vierstra RD (2011) Phylogenetic comparison of *F-Box (FBX)* gene superfamily within the plant kingdom reveals divergent evolutionary histories indicative of genomic drift. *PLoS One* 6(1):e16219.
2. Kent WJ (2002) BLAT--the BLAST-like alignment tool. *Genome Res* 12(4):656-664.
3. Lee TH, Tang H, Wang X, & Paterson AH (2013) PGDD: a database of gene and genome duplication in plants. *Nucleic Acids Res* 41(Database issue):D1152-1158.
4. Holloway AK, Lawniczak MK, Mezey JG, Begun DJ, & Jones CD (2007) Adaptive gene expression divergence inferred from population genomics. *PLoS Genet* 3(10):2007-2013.
5. Ohta T (2002) Near-neutrality in evolution of genes and gene regulation. *Proc Natl Acad Sci USA* 99(25):16134-16137.
6. Mackay TF, *et al.* (2012) The *Drosophila melanogaster* genetic reference panel. *Nature* 482(7384):173-178.
7. Tennessen JA, *et al.* (2012) Evolution and functional impact of rare coding variation from deep sequencing of human exomes. *Science* 337(6090):64-69.
8. Hoff P (2009) *A First Course in Bayesian Statistical Methods* (Springer, New York).

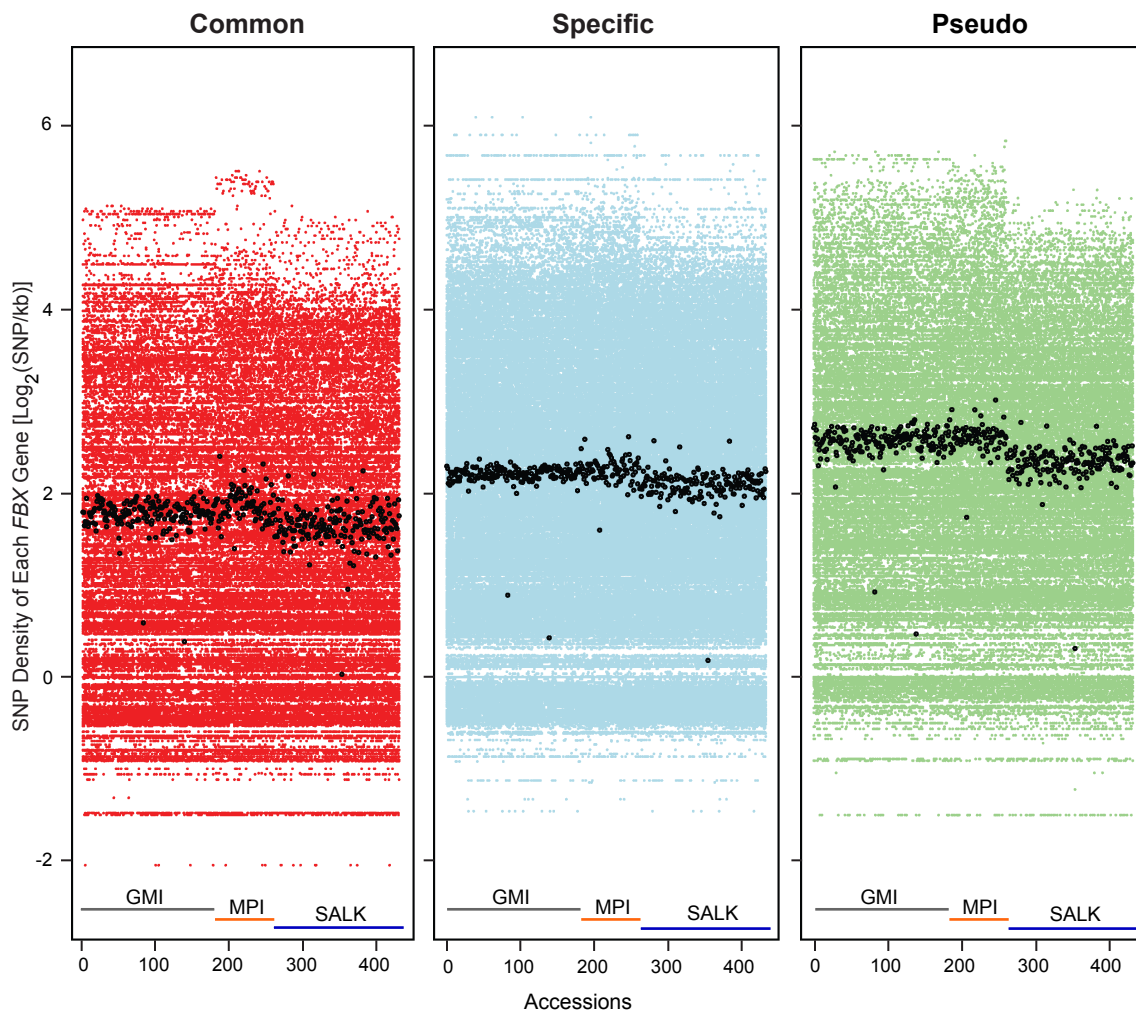

**Fig. S1.** SNP density for each *FBX* gene from Common, Lineage-Specific and Pseudo groups in 431 *Arabidopsis thaliana* accessions. The mutated sites aligned with each Col-0 reference *FBX* coding sequence were counted, normalized by sequence length, and plotted against each accession. Black circles represent the average number of mutated sites in all *FBX* genes from each group in each accession. GMI, MPI, and SALK highlight the accessions selected for whole-genome sequencing at the Gregor Mendel Institute of Molecular Plant Biology (Long *et al.*, *Nat Genet* 2013 (45):884-890; 180 accessions), the Max Planck Institute (Cao *et al.*, *Nat Genet* 2011 (43):956-963; 80 accessions), and the Salk Institute for Biological Studies (Schimtz *et al.*, *Nature* 2013 (495):193-198; 171 accessions), respectively.

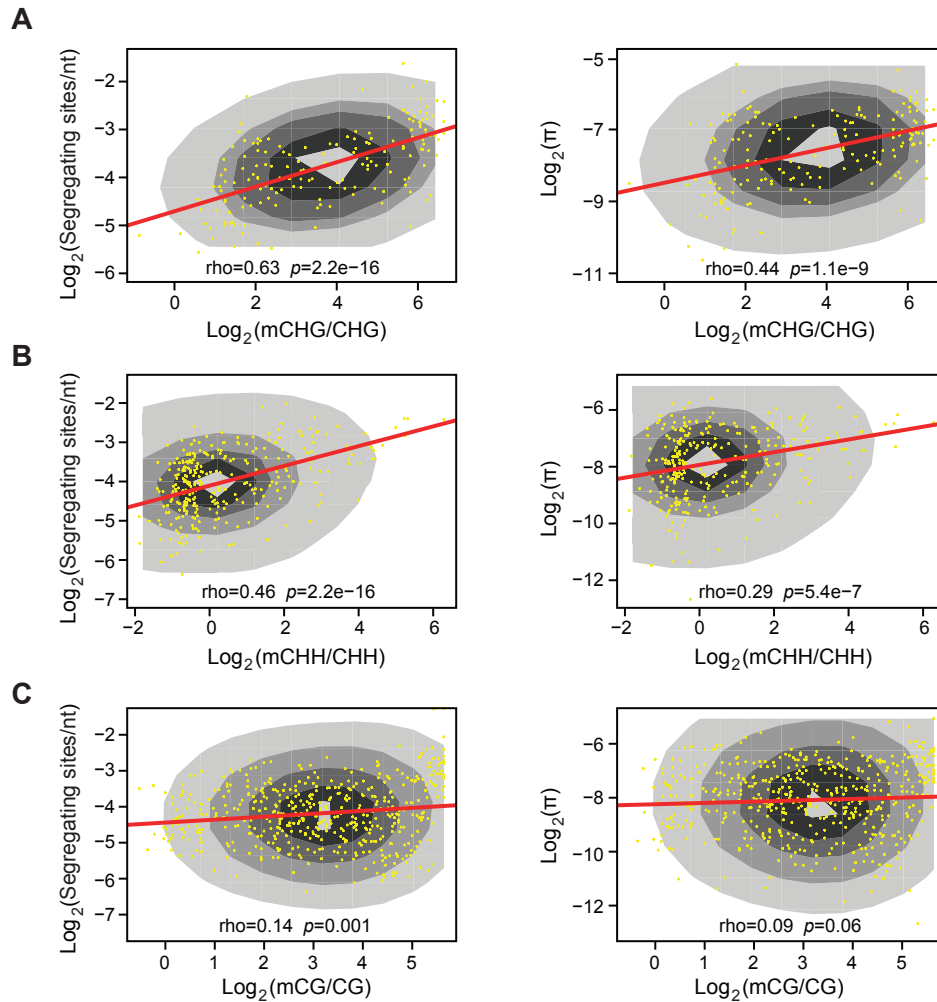

**Fig. S2.** Spearman ranking correlation test between sequence polymorphism (segregating sites/nt, left panels) or diversity ( $\pi$ , right panels) and the extent of coding sequence methylation at CHG (A), CHH (B), and CG (C) contexts. Yellow dots represent each pair of observed data. The probability distribution of the data in the quadratic panels is shown by a contour plot. Each contour (from inside to outside) represents the distribution of the 2.5, 26, 50, 75, and 97.5 percentiles of observed data. Correlation coefficients ( $\rho$ ),  $p$  values, and lines of best-fit linear regression are included.

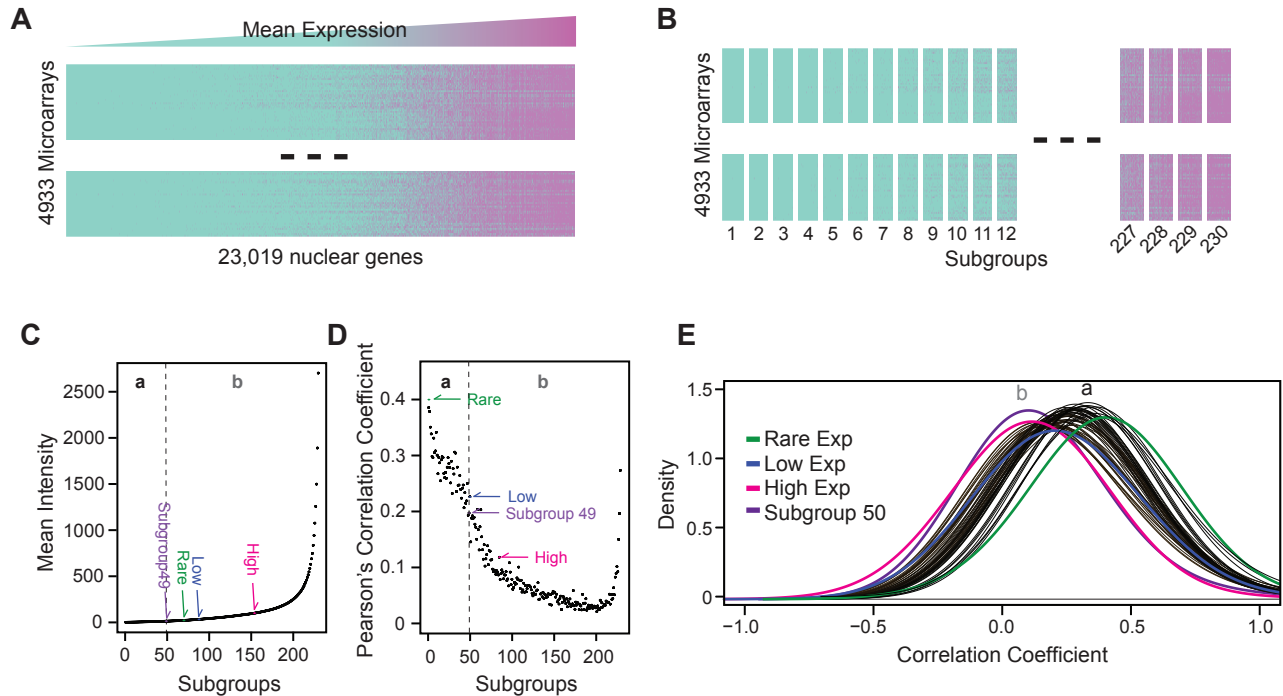

**Fig. S3.** Sampling of 230 subgroups of *FBX* transcripts for upregulated and basal expression patterns. (A, B) All 23,019 *Arabidopsis* transcripts whose expression was detected at least once in the Col-0 NASCArrays were aligned based on their mean expression level and equally split into 230 subgroups. (C) The exponential growth of the mean expression level of 230 subgroups of transcripts in Col-0 in NASCArrays. The subgroups with the closest mean expression level to High, Low, and Rare Exp(ression) *FBX* gene groups are marked. (D) Distribution of mean Pearson's correlation coefficients of 230 subgroups of transcripts in Col-0. The positions of High, Low, and Rare *FBX* gene groups are highlighted with the subgroups that share the closest mean Pearson's correlation coefficients. (E) Comparison of expression correlation extents between High, Low, and Rare Exp groups of *FBX* genes with the first 50 subgroups of transcripts shown in (A) and (B). Gaussian kernel density curves (bandwidth=0.25) were applied to estimate the relationship of pairwise Pearson's correlation coefficients of expression between each group. The first 49 subgroups of Col-0 transcripts and Low and Rare Exp groups of *FBX* genes overlapped with Cluster "a" which showed high expression correlation within each group. The 50th subgroup and High Exp group overlapped Cluster "b", which had lower expression correlation within the group.

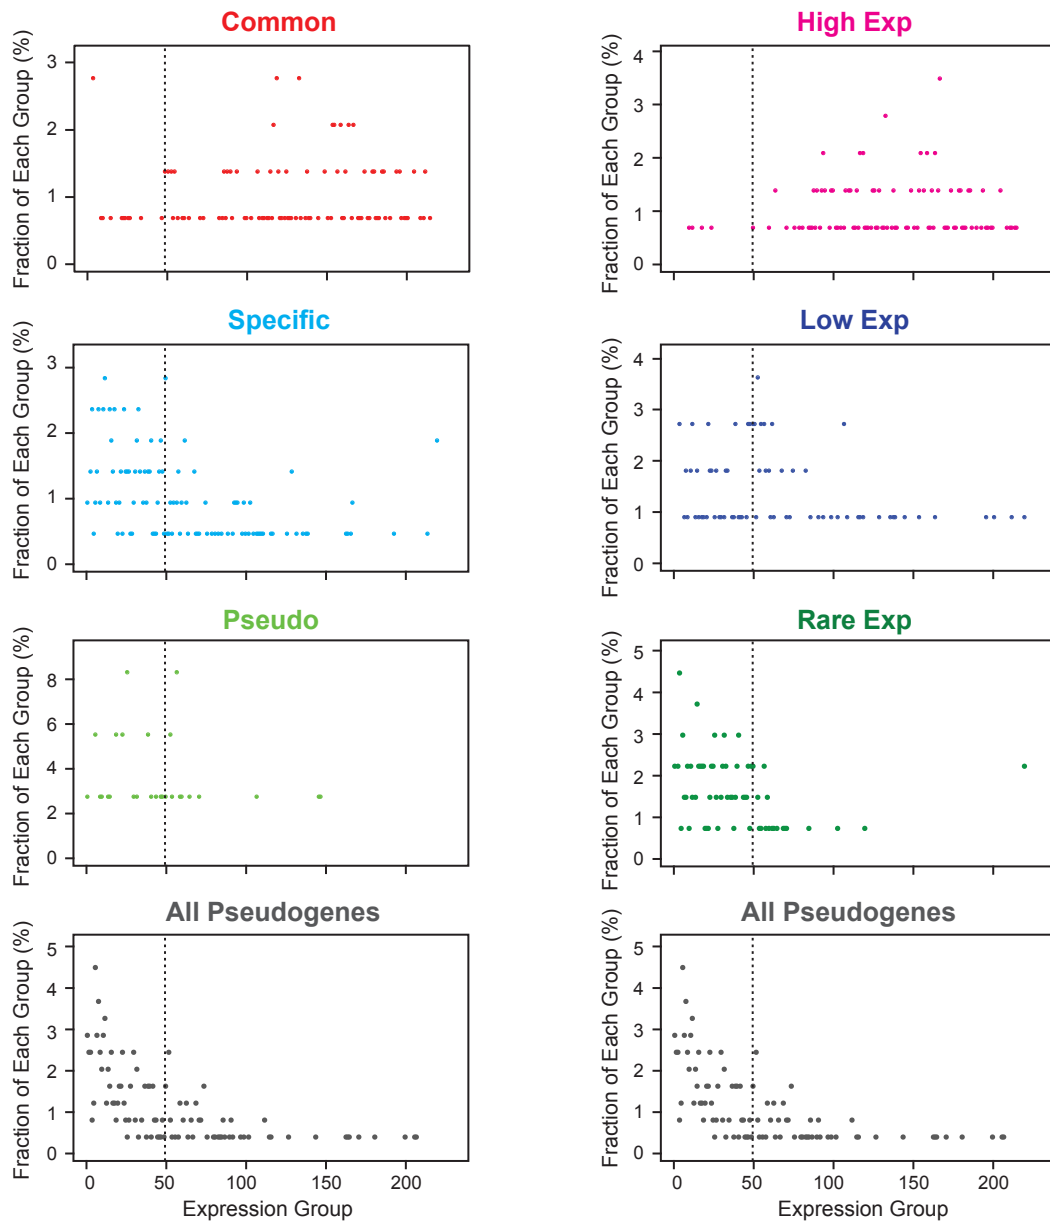

**Fig. S4.** Frequency distribution of *FBX* genes with Common, Lineage-Specific, and Pseudo evolutionary histories and High, Low, and Rare leaf expression profiles among accessions, along with all *Arabidopsis* pseudogenes, in 230 subgroups of transcripts in Col-0. Common, Lineage-Specific, and Pseudo groups are described in Fig. 1A. High, Low, and Rare Exp(ression) groups are described in Fig. 3. The list of all pseudogenes was retrieved from the current annotation in the *Arabidopsis* Information Resource (TAIR, Version 10). The division of 230 subgroups is described in Figs. S3A and S3B. The dashed lines mark the division between Cluster a genes (genes with basal expression and high expression correlation coefficients) and Cluster b genes (genes with upregulated expression and low expression correlation coefficients) in *Arabidopsis* (see Figs. 3E and S3).



**A**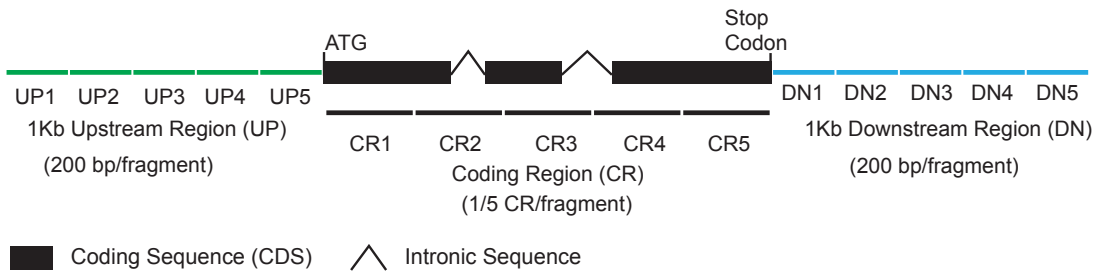**B**

|    |         |    |          |
|----|---------|----|----------|
| 1  | UP_π    | 30 | CR1_CHG  |
| 2  | CDS_π   | 31 | CR2_CHG  |
| 3  | DN_π    | 32 | CR3_CHG  |
| 4  | UP_K    | 33 | CR4_CHG  |
| 5  | CDS_K   | 34 | CR5_CHG  |
| 6  | DN_K    | 35 | DN1_CHG  |
| 7  | CDS_CG  | 36 | DN2_CHG  |
| 8  | CDS_CHG | 37 | DN3_CHG  |
| 9  | CDS_CHH | 38 | DN4_CHG  |
| 10 | UP1_CG  | 39 | DN5_CHG  |
| 11 | UP2_CG  | 40 | UP1_CHH  |
| 12 | UP3_CG  | 41 | UP2_CHH  |
| 13 | UP4_CG  | 42 | UP3_CHH  |
| 14 | UP5_CG  | 43 | UP4_CHH  |
| 15 | CR1_CG  | 44 | UP5_CHH  |
| 16 | CG2_CG  | 45 | CR1_CHH  |
| 17 | CR3_CG  | 46 | CR2_CHH  |
| 18 | CR4_CG  | 47 | CR3_CHH  |
| 19 | CR5_CG  | 48 | CR4_CHH  |
| 20 | DN1_CG  | 49 | CR5_CHH  |
| 21 | DN2_CG  | 50 | DN1_CHH  |
| 22 | DN3_CG  | 51 | DN2_CHH  |
| 23 | DN4_CG  | 52 | DN3_CHH  |
| 24 | DN5_CG  | 53 | DN4_CHH  |
| 25 | UP1_CHG | 54 | DN5_CHH  |
| 26 | UP2_CHG | 55 | Max_rho  |
| 27 | UP3_CHG | 56 | $K_S$    |
| 28 | UP4_CHG | 57 | Taxa     |
| 29 | UP5_CHG | 58 | $\alpha$ |

π: Pairwise sequence diversity per nucleotide  
 K: Segregating sites per nucleotide  
 CG, CHG, CHH: Methylation Contexts  
 Max\_rho: Maximum inter-SNP recombination rate in the coding region calculated using LDHat (version 2.2)  
 $K_S$ : Synonymous substitutions per synonymous site  
 Taxa: Taxinomic level of orthologous group  
 $\alpha$ : Recent selection pressure,  $\alpha=1-(Pn/Ps)(Ds/Dn)$

**C**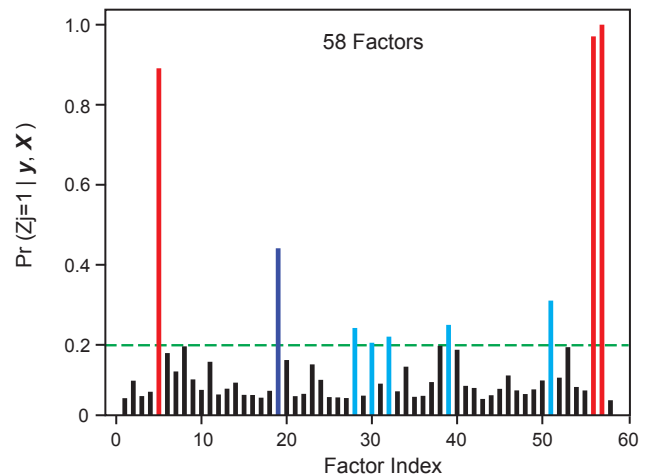**D**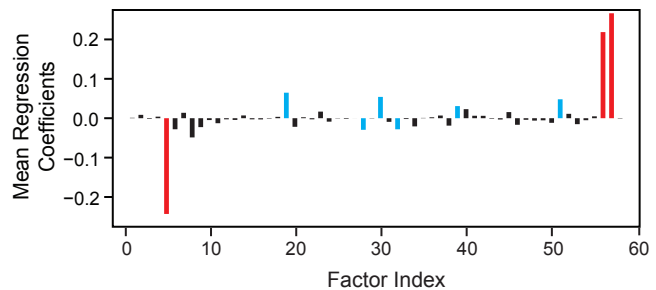

**Fig. S5.** Bayesian multivariate linear regression analysis of the *FBX* superfamily. (A) Different regions selected for calculating the values of 58 genomic and epigenomic variants (gene factors) in an *FBX* gene. (B) List of 58 different gene factors. (C) Posterior probability (*PP*) of a non-zero effect ( $Z_j=1$ ) of 58 gene factors in (B) on the *FBX* gene expression.  $y$  and  $X$  are two matrices containing the observed mean expression values for Col-0 in NASCArrays and the observed values of 58 gene factors, respectively, of 255 training *FBX* genes shown in Fig S6. (D) Mean regression coefficients averaged from 10,000X Gibbs samplings.

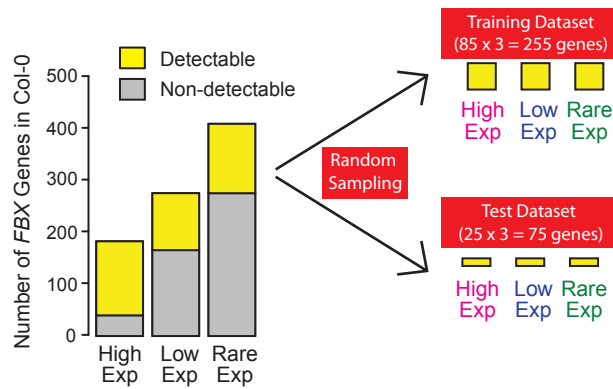

**Fig. S6.** Random sampling for Bayesian statistical modeling of *FBX* loci. High, Low, and Rare Exp(ression) groups were clustered based on the leaf RNA-seq expression analysis described in Fig. 3. Detectable and non-detectable *FBX* genes were defined by their presence or absence in the 4,933 microarrays available for Col-0 in the NASCArrays, respectively. For developing the Bayesian multivariate linear regression model, 85 and 25 detectable *FBX* genes were randomly sampled from each of High, Low, and Rare Exp groups and combined into training and test datasets, respectively.

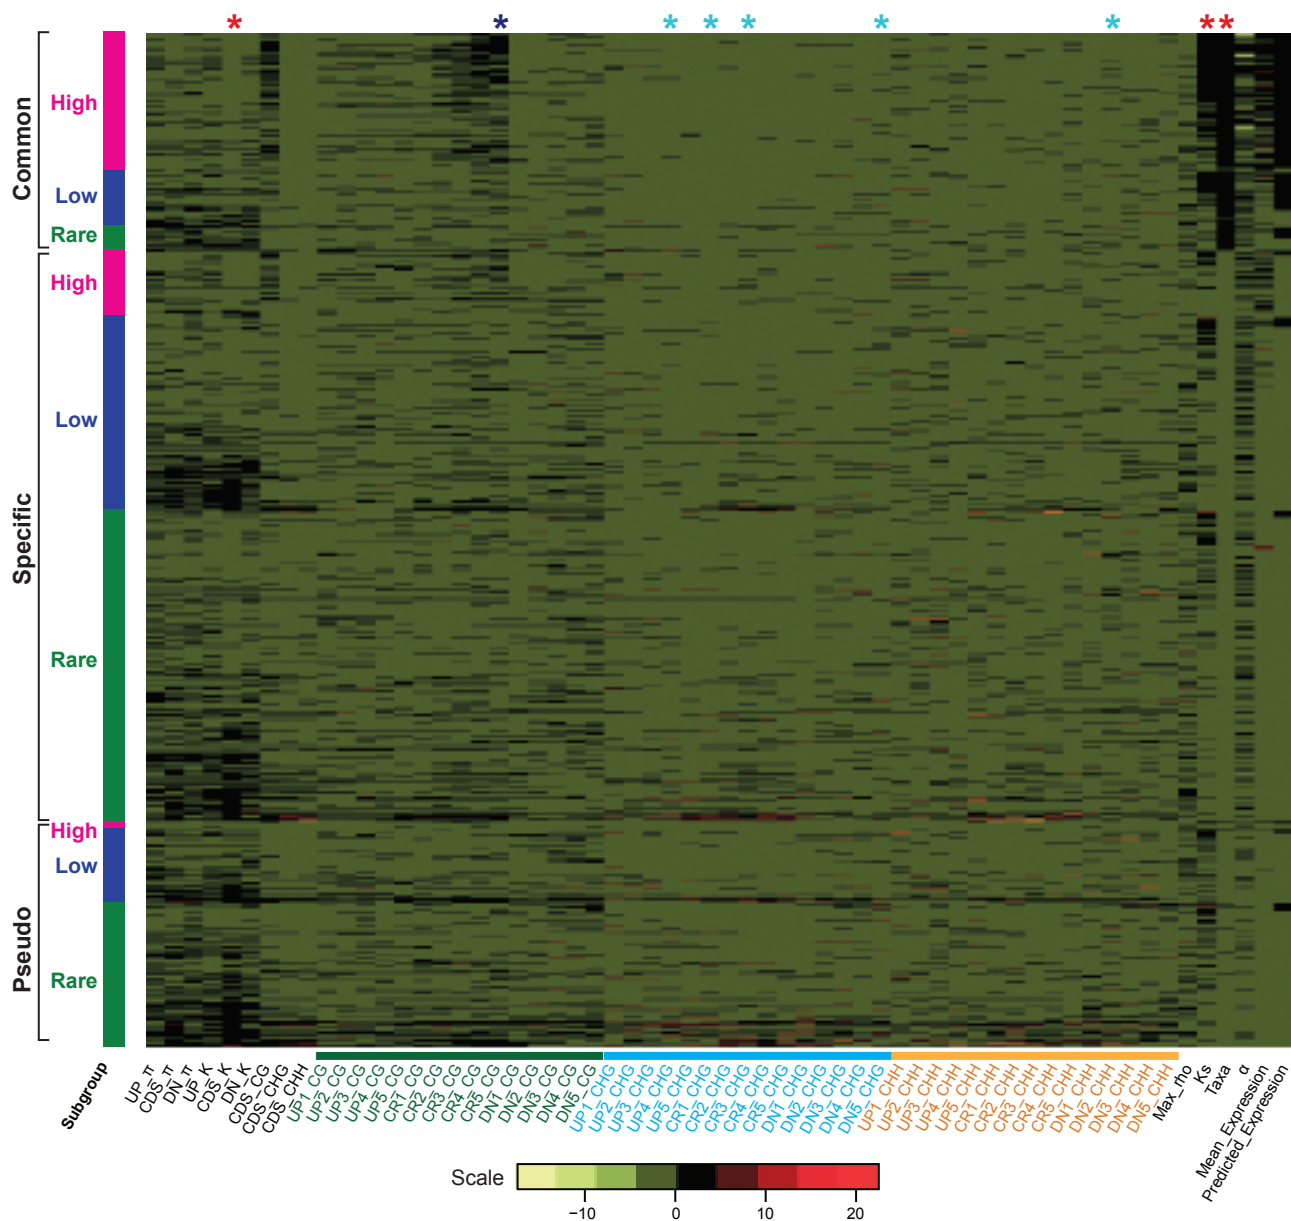

**Fig. S7.** A landscape view showing the impact of genomic and epigenomic factors on the expression of *FBX* genes. Each row represents one of the 869 *FBX* genes shown in Table S1. Each column represents one of the 58 gene factors described in Fig. S5 along with the observed mean expression data from the NASCArray datasets, and predicted mean expression values obtained by the Bayesian analysis described in Fig. S5. *FBX* genes in each subgroup were sorted based on their predicted expression values from high to low. The data in each column were then scaled to mean=0 and SD=1. The entire scaled data matrix was colored by heatmap.2 in R. Asterisks identify parameters with PP > 80% (red), >40% (dark blue), and >20% (cyan), respectively.

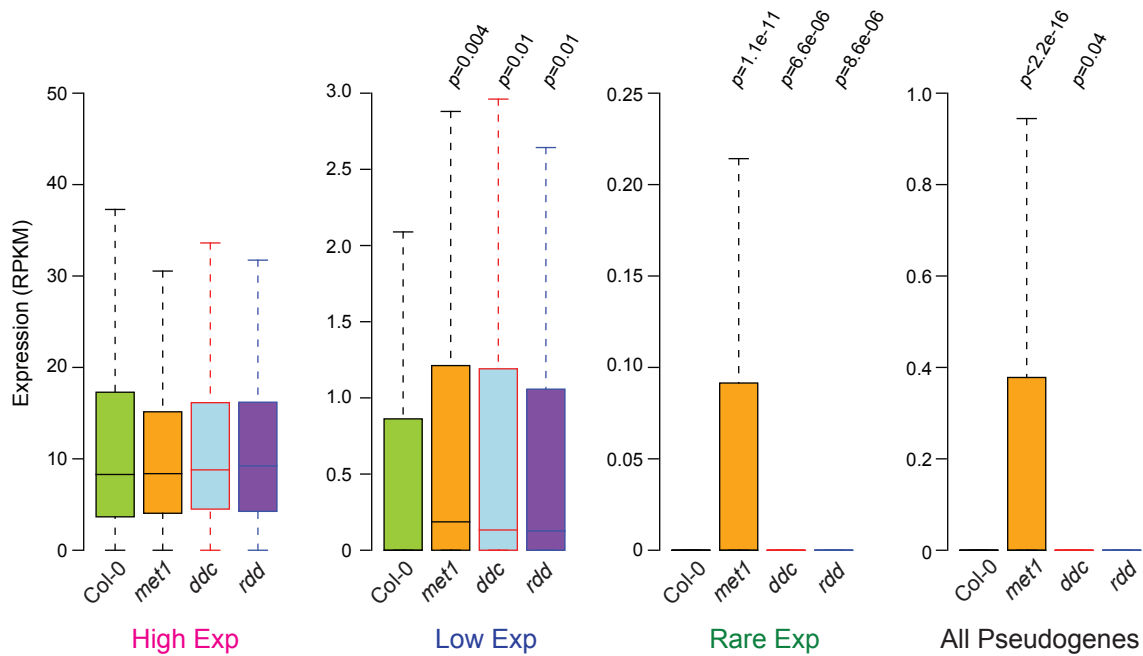

**Fig. S8.** Expression comparison of High, Low, Rare Exp(ression) *FBX* groups and all *Arabidopsis* pseudogenes between Col-0 and three methylation defective mutants (*met1*, *ddc*, *rdd*). *p*-values (Wicoxon rank sum test) show the significant expression differences of genes in each group between Col-0 and the three methylation defective mutants. All pseudogenes were retrieved from TAIR (Version 7).

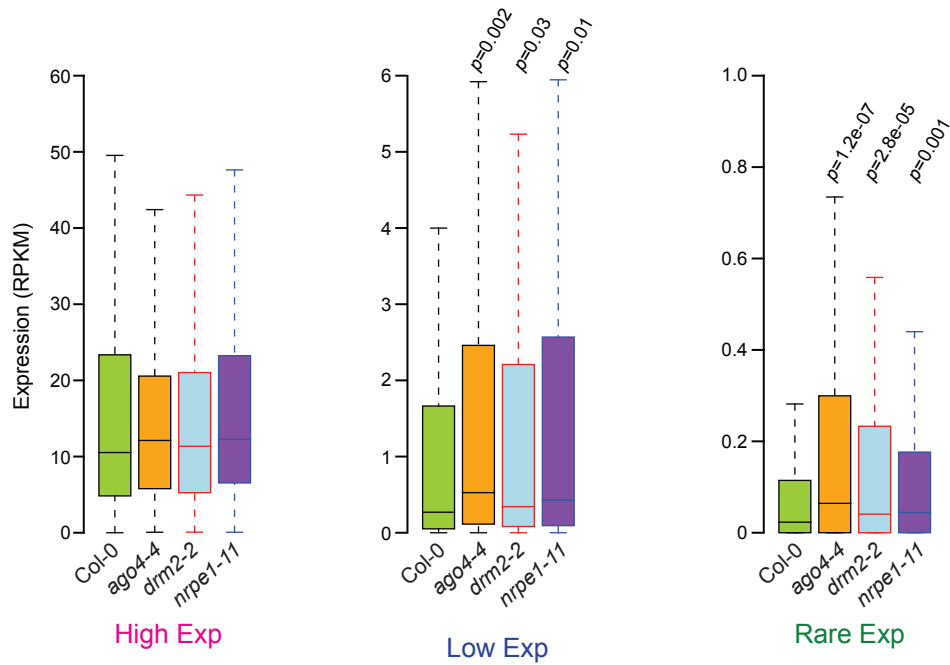

**Fig. S9.** Comparison of expression levels of *FBX* genes among mutants abrogating RdDM. Raw Illumina HiSeq RNA-seq data from floral tissue were retrieved from Ausin *et al.* (*Proc. Natl. Acad. Sci. USA* 2012 (109):8374-8381). The 50-bp RNA-Seq reads were aligned to the *Arabidopsis* genome (TAIR10) using TopHat2 (Version 2.0.8). Only reads mapping uniquely to the genome with a maximum of two mismatches were counted. The expression value of each *FBX* gene was calculated using Cufflinks (Version 2.1.1) based on the previous annotation in Hua *et al.* (*PLoS One* 2011 (6): e16219). *p*-values (Wicoxon rank sum test) show significantly higher expression levels of *FBX* genes in the mutants than in Col-0.

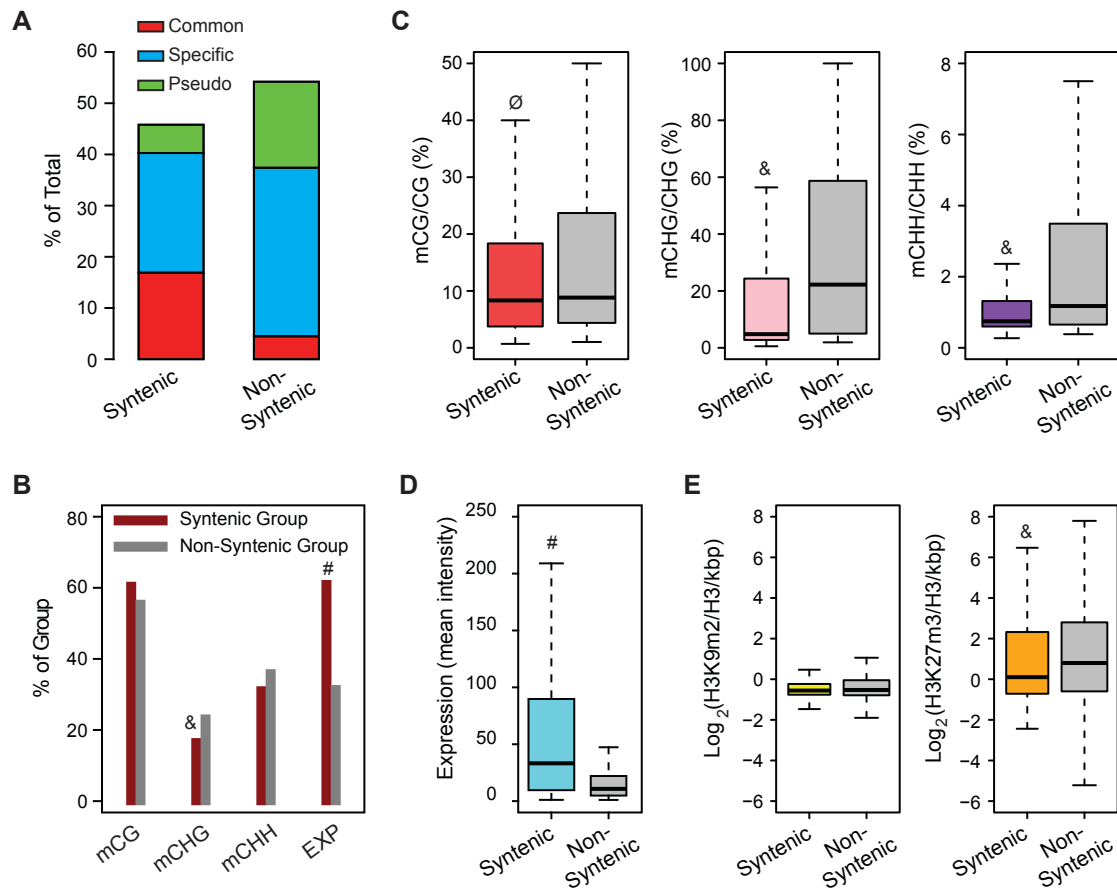

**Fig. S10.** Effects of gene duplications on the functional divergence of *FBX* genes. (A) The syntenic *FBX* group is more enriched for Common *FBX* genes while the non-syntenic *FBX* group is populated more by Lineage-Specific and Pseudo *FBX* genes. (B) Syntenic *FBX* genes are less frequently CHG methylated but are more frequently EXP(ressed). (C) CG, CHG, and CHH methylation levels are significantly lower in the corresponding methylated syntenic *FBX* genes than non-syntenic *FBX* genes. (D) Syntenic *FBX* genes have much higher expression levels than non-syntenic *FBX* genes. (E) H3K27m3, but not H3K9m2, is more enriched in the coding regions of non-syntenic *FBX* genes. See Fig. 1 for description of boxplots.  $p$  values in (B) were calculated by the Fischer's exact test and in (C-E) by Wilcoxon rank test.  $\emptyset = p(\text{Syntenic Group} < \text{Non-Syntenic Group}) < 0.05$ .  $\& = p(\text{Syntenic Group} < \text{Non-Syntenic Group}) < 0.01$ .  $\# = p(\text{Syntenic Group} > \text{Non-Syntenic Group}) < 0.01$ .

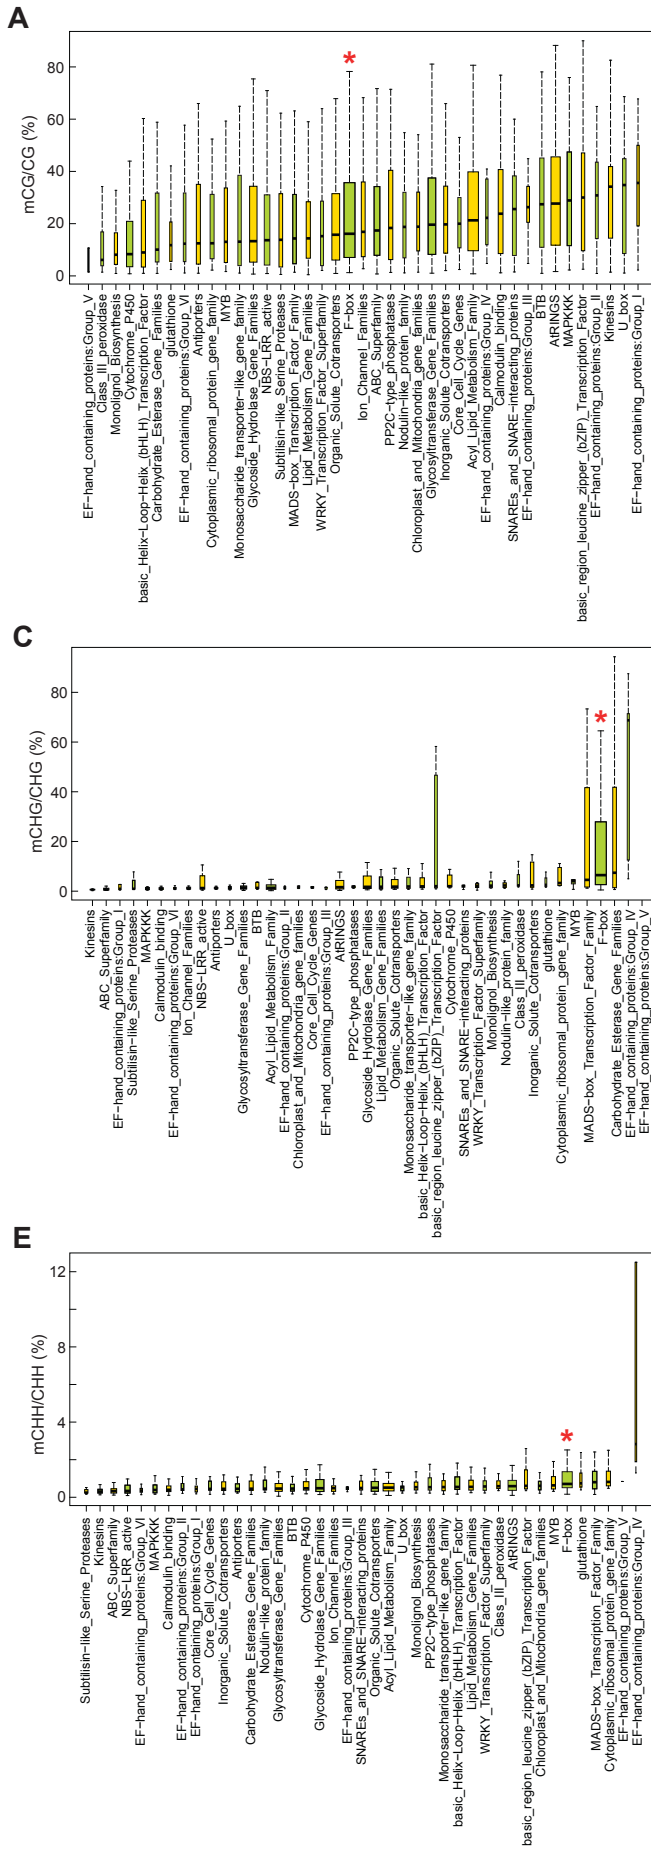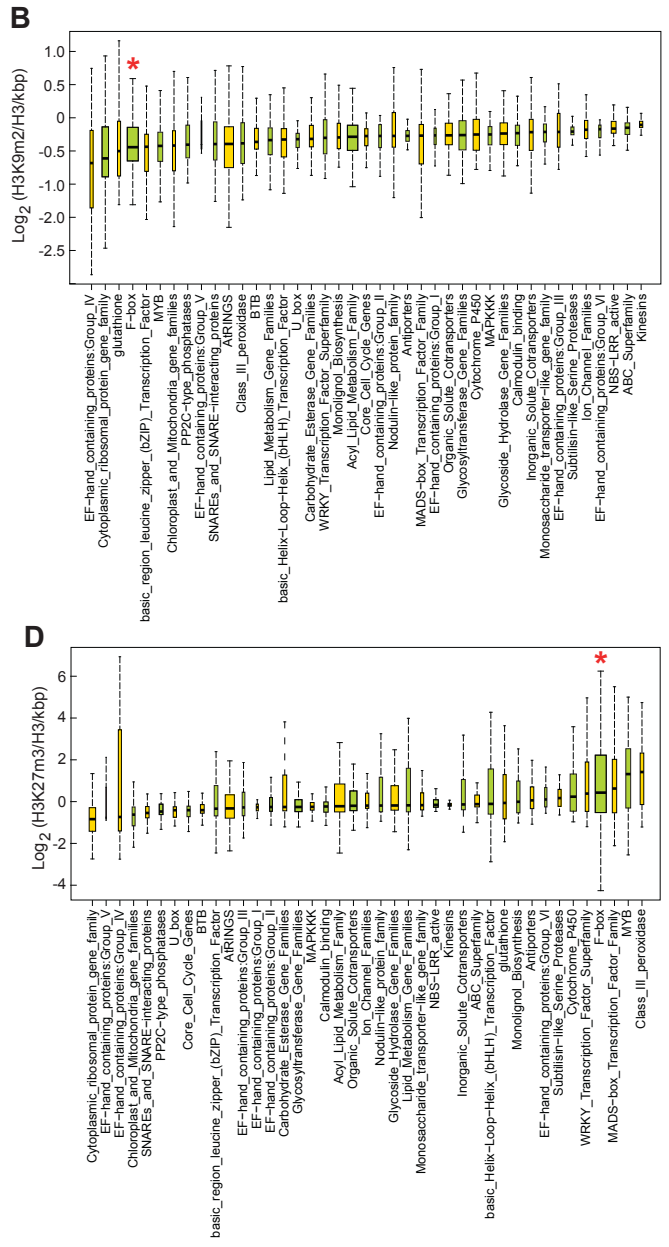

**Fig. S11.** Comparisons of epigenetic modifications across 41 gene families in *Arabidopsis* wild-type Col-0. DNA methylation (A, C, and E) and histone methylation (B and D) were analyzed as described in Fig. 4D and Fig. 4F, respectively, except that the entire coding region of each gene was selected for the comparison. Families were sorted from low to high levels of each modification. Red asterisks identify the FBX gene superfamily. The gene list of each family was described in Schmitz *et al.* (*Nature* 2013 (495):193-198). See Fig. 1 for description of boxplots; the width of each box represents the numerical size of each family compared.

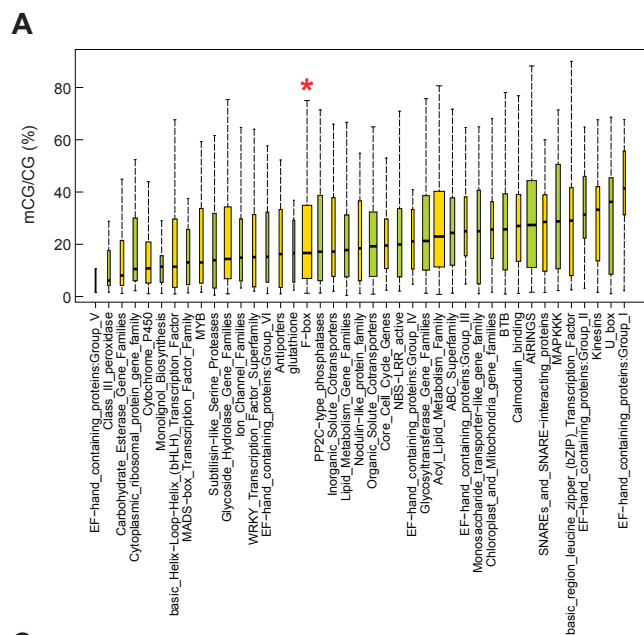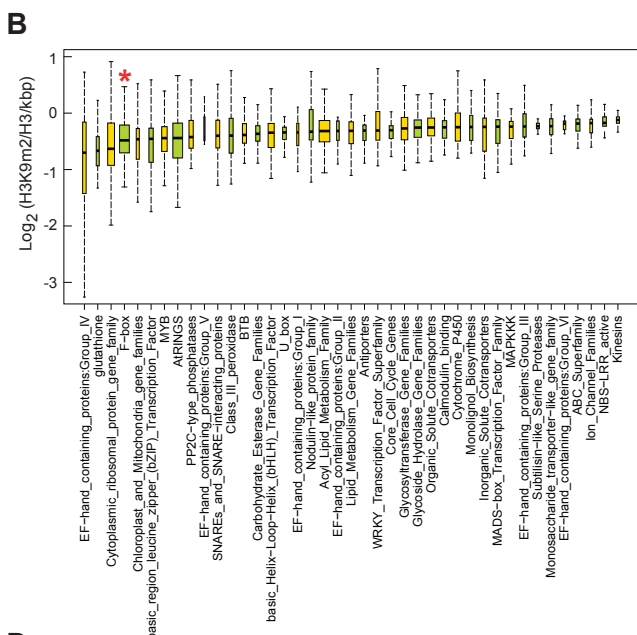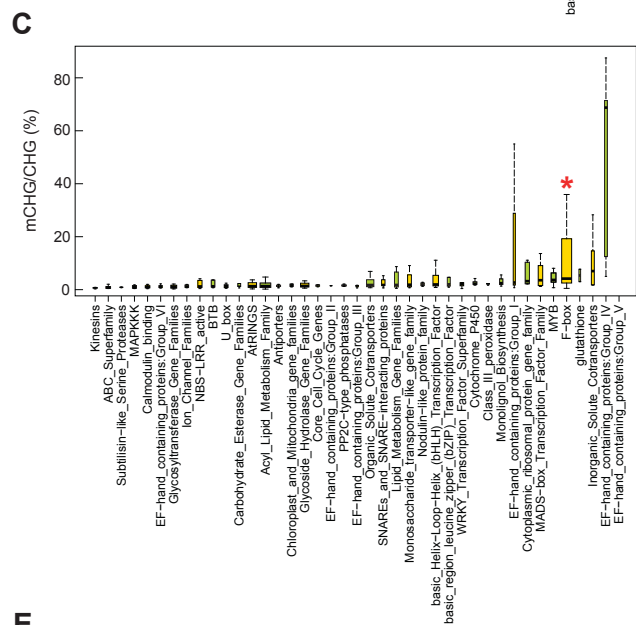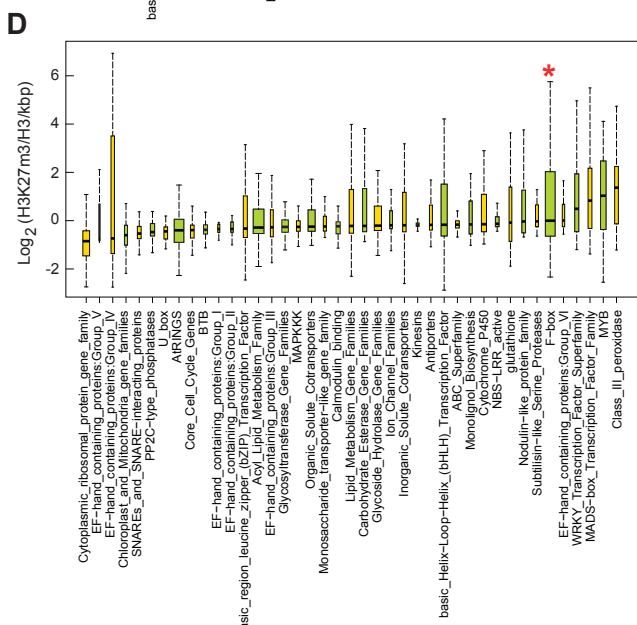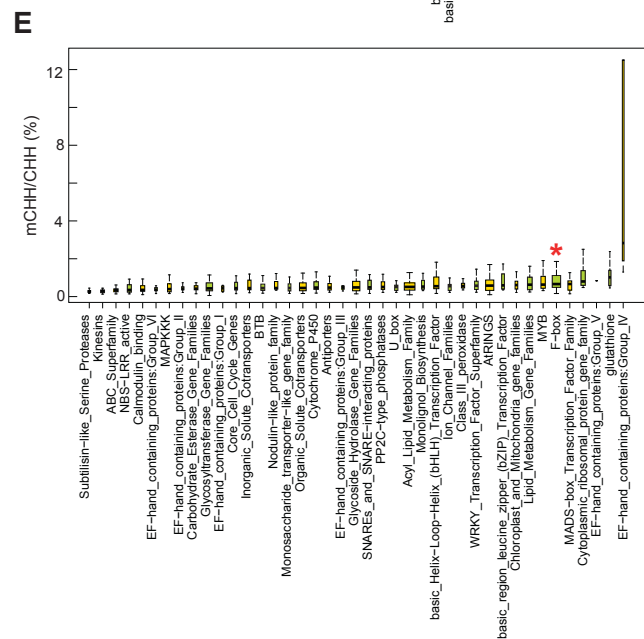

**Fig. S12.** Comparisons of epigenetic modifications across 41 gene families within syntenic blocks in *Arabidopsis* wild-type Col-0. DNA methylation (A, C, and E) and histone methylation (B and D) were analyzed as described in Fig. 4D and Fig. 4F, respectively, except that the entire coding region of each gene was selected for the comparison. Families were sorted from low to high levels of each modification. Red asterisks identify the *FBX* gene superfamily. The gene list of each family was described in Schimtz *et al.* (*Nature* 2013 (495):193-198). Syntenic blocks shared between *A. thaliana* and *A. lyrata* were retrieved from Lee *et al.* (*Nucleic Acids Res* 2013(41):D1152-1158). See Fig. 1 for description of boxplots; the width of each box represents the numerical size of each family compared.



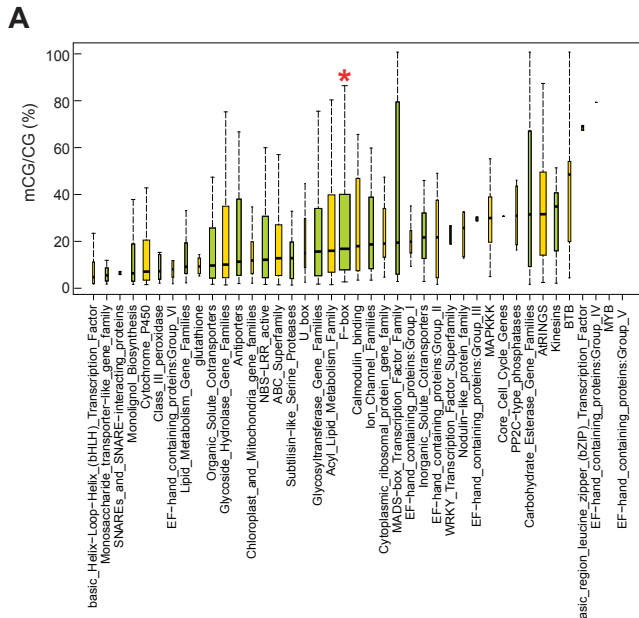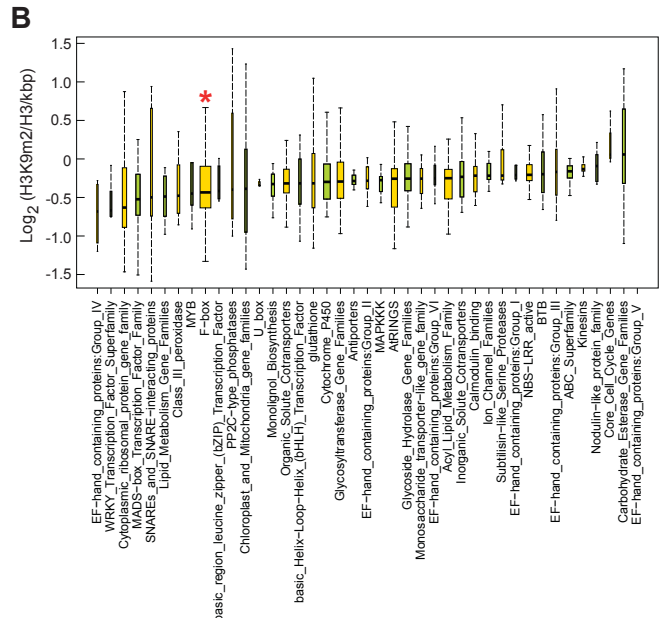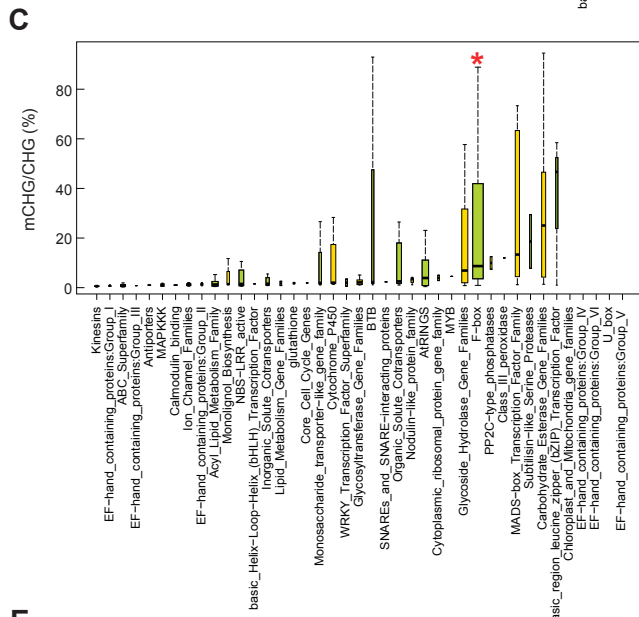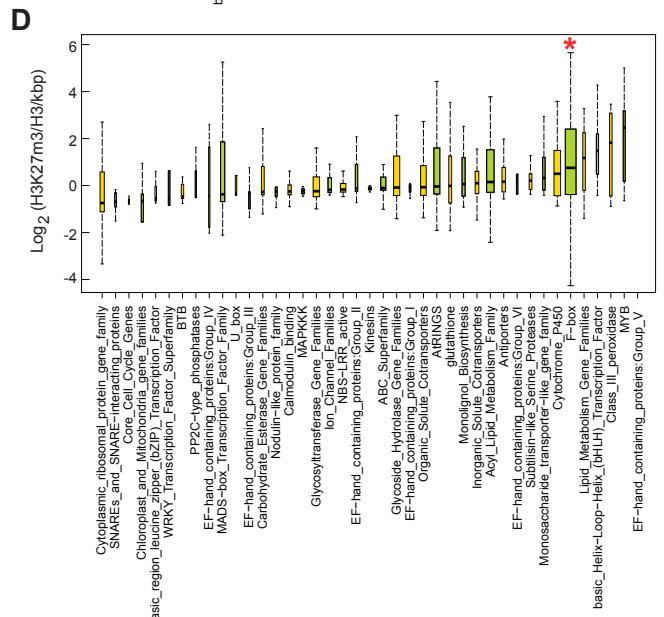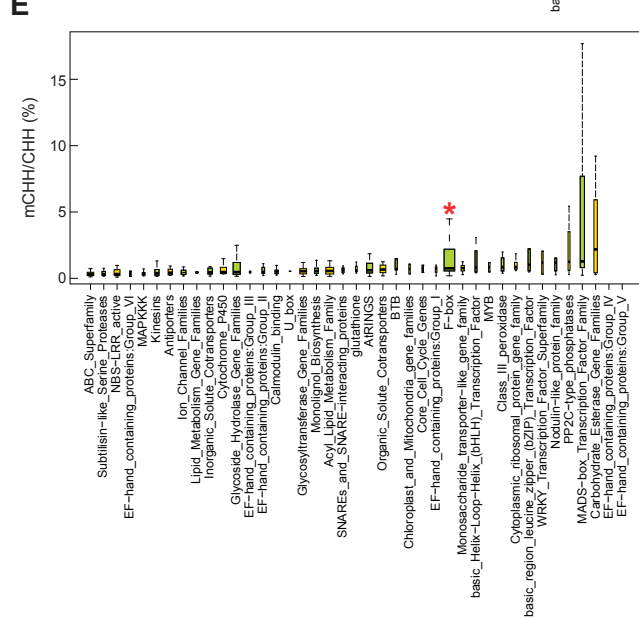

**Fig. S13.** Comparisons of epigenetic modifications across 41 gene families outside syntenic blocks in *Arabidopsis* wild-type Col-0. DNA methylation (A, C, and E) and histone methylation (B and D) were analyzed as described in Fig. 4D and Fig. 4F, respectively, except that the entire coding region of each gene was selected for the comparison. Families were sorted from low to high levels of each modification. Red asterisks identify the FBX gene superfamily. The gene list of each family was described in Schimtz *et al.* (*Nature* 2013 (495):193-198). Syntenic blocks shared between *A. thaliana* and *A. lyrata* were retrieved from Lee *et al.* (*Nucleic Acids Res* 2013(41):D1152-1158). See Fig. 1 for description of boxplots; the width of each box represents the numerical size of each family compared.

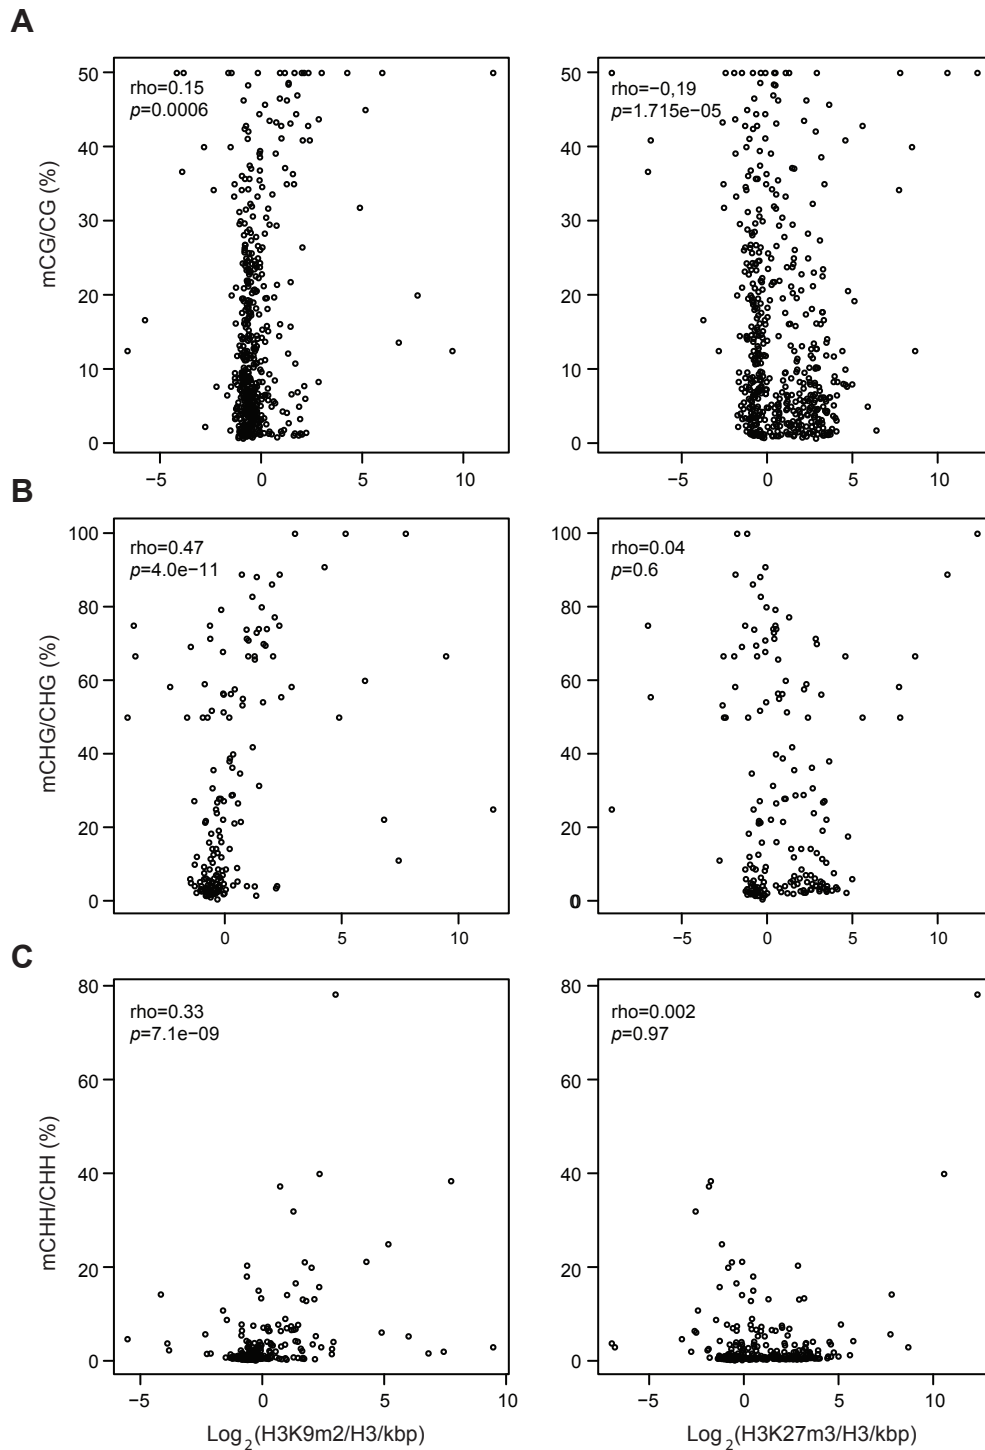

**Fig. S14.** Spearman rank correlation test between histone methylation (H3K9m2, left panels or H3K27m3, right panels) and the extent of coding sequence methylation at CG (A), CHG (B), and CHH (C) contexts. The ChIP-chip mapping data of H3K9m2 (GSM910290) and H3K27m3 (GSM910294) were retrieved from Deleris *et al.* (*PLoS Genet* (2012) 8: e1003062). The single base-resolution methylation profile were provided by Lister *et al.* (*Cell* (2008) 133: 523-536)

**Table S1.** Observed values of 58 genomic variants and mean expression in NASCArrays of *FBX* genes (see note at the bottom of the table)

| Category        | Common_High |
|-----------------|-------------|-------------|-------------|-------------|-------------|-------------|-------------|-------------|-------------|
| FBX_ID          | At_F0001    | At_F0016    | At_F0039    | At_F0058    | At_F0064    | At_F0068    | At_F0115    | At_F0153    | At_F0164    |
| GB_mC           | -           | -           | -           | bm          | -           | -           | -           | bm          | -           |
| UP_π            | 3.7E-03     | 3.8E-03     | 2.5E-03     | 3.5E-03     | 1.1E-02     | 1.4E-02     | 1.2E-02     | 2.1E-03     | 6.8E-03     |
| CDS_π           | 3.9E-03     | 1.5E-03     | 3.0E-04     | 2.7E-03     | 1.3E-03     | 9.9E-03     | 1.4E-03     | 6.9E-04     | 5.1E-03     |
| DN_π            | 4.1E-03     | 2.5E-03     | 2.5E-03     | 1.6E-03     | 3.0E-03     | 1.3E-02     | 1.9E-03     | 3.6E-03     | 9.4E-03     |
| UP_K            | 4.8E-02     | 3.9E-02     | 5.4E-02     | 3.8E-02     | 1.5E-01     | 1.3E-01     | 1.5E-01     | 4.3E-02     | 7.0E-02     |
| CDS_K           | 2.7E-02     | 1.2E-02     | 1.4E-02     | 3.3E-02     | 3.0E-02     | 5.5E-02     | 3.6E-02     | 1.8E-02     | 4.2E-02     |
| DN_K            | 4.3E-02     | 3.9E-02     | 3.5E-02     | 3.4E-02     | 3.8E-02     | 1.2E-01     | 4.6E-02     | 4.7E-02     | 6.5E-02     |
| CDS_CG          | 7.4E+00     | 7.3E+00     | 0.0E+00     | 4.1E+01     | 0.0E+00     | 0.0E+00     | 4.6E+00     | 2.6E+01     | 0.0E+00     |
| CDS_CHG         | 0           | 0           | 0           | 2           | 0           | 0           | 0           | 0           | 0           |
| CDS_CHH         | 0           | 0           | 0           | 0           | 1           | 0           | 0           | 0           | 0           |
| UP1_CG          | 0           | 0           | 0           | 100         | 0           | 0           | 75          | 0           | 0           |
| UP2_CG          | 0           | 0           | 0           | 50          | 0           | 0           | 83          | 0           | 0           |
| UP3_CG          | 0           | 0           | 0           | 25          | 0           | 0           | 7           | 0           | 0           |
| UP4_CG          | 0           | 0           | 0           | 50          | 0           | 0           | 8           | 0           | 0           |
| UP5_CG          | 0           | 0           | 0           | 100         | 0           | 0           | 0           | 0           | 0           |
| CR1_CG          | 0           | 0           | 0           | 100         | 0           | 0           | 0           | 45          | 0           |
| CR2_CG          | 19          | 0           | 0           | 43          | 0           | 0           | 0           | 20          | 0           |
| CR3_CG          | 18          | 0           | 0           | 41          | 0           | 0           | 0           | 26          | 0           |
| CR4_CG          | 0           | 12          | 0           | 25          | 0           | 0           | 21          | 56          | 0           |
| CR5_CG          | 0           | 42          | 0           | 40          | 0           | 0           | 20          | 0           | 0           |
| DN1_CG          | 0           | 0           | 0           | 0           | 0           | 0           | 0           | 0           | 0           |
| DN2_CG          | 0           | 0           | 0           | 0           | 0           | 0           | 0           | 0           | 0           |
| DN3_CG          | 0           | 0           | 0           | 6           | 0           | 0           | 0           | 0           | 0           |
| DN4_CG          | 0           | 0           | 0           | 0           | 0           | 0           | 0           | 0           | 0           |
| DN5_CG          | 0           | 0           | 0           | 40          | 0           | 0           | 0           | 0           | 0           |
| UP1_CHG         | 0           | 0           | 0           | 0           | 0           | 0           | 33          | 0           | 0           |
| UP2_CHG         | 0           | 0           | 0           | 0           | 0           | 0           | 71          | 0           | 0           |
| UP3_CHG         | 0           | 0           | 0           | 0           | 0           | 0           | 18          | 0           | 0           |
| UP4_CHG         | 0           | 0           | 0           | 0           | 0           | 0           | 0           | 0           | 0           |
| UP5_CHG         | 0           | 0           | 0           | 17          | 0           | 0           | 0           | 0           | 0           |
| CR1_CHG         | 0           | 0           | 0           | 0           | 0           | 0           | 0           | 0           | 0           |
| CR2_CHG         | 0           | 0           | 0           | 0           | 0           | 0           | 0           | 0           | 0           |
| CR3_CHG         | 0           | 0           | 0           | 3           | 0           | 0           | 0           | 0           | 0           |
| CR4_CHG         | 0           | 0           | 0           | 0           | 0           | 0           | 0           | 0           | 0           |
| CR5_CHG         | 0           | 0           | 0           | 0           | 0           | 0           | 0           | 0           | 0           |
| DN1_CHG         | 0           | 0           | 0           | 0           | 0           | 0           | 0           | 0           | 0           |
| DN2_CHG         | 0           | 0           | 0           | 0           | 0           | 0           | 0           | 0           | 0           |
| DN3_CHG         | 0           | 0           | 0           | 0           | 0           | 0           | 9           | 0           | 0           |
| DN4_CHG         | 0           | 0           | 0           | 0           | 0           | 0           | 0           | 0           | 0           |
| DN5_CHG         | 0           | 0           | 0           | 0           | 0           | 0           | 0           | 0           | 0           |
| UP1_CHH         | 0           | 0           | 0           | 0           | 0           | 0           | 27          | 0           | 0           |
| UP2_CHH         | 0           | 0           | 0           | 0           | 0           | 0           | 24          | 0           | 0           |
| UP3_CHH         | 0           | 0           | 0           | 0           | 0           | 0           | 10          | 0           | 0           |
| UP4_CHH         | 0           | 0           | 0           | 0           | 3           | 0           | 0           | 0           | 0           |
| UP5_CHH         | 6           | 0           | 0           | 0           | 0           | 0           | 2           | 0           | 0           |
| CR1_CHH         | 0           | 0           | 0           | 0           | 3           | 1           | 0           | 0           | 1           |
| CR2_CHH         | 0           | 0           | 0           | 0           | 0           | 0           | 0           | 0           | 0           |
| CR3_CHH         | 0           | 0           | 0           | 0           | 0           | 0           | 0           | 0           | 0           |
| CR4_CHH         | 0           | 0           | 0           | 0           | 0           | 0           | 0           | 0           | 0           |
| CR5_CHH         | 0           | 0           | 0           | 0           | 4           | 0           | 0           | 0           | 0           |
| DN1_CHH         | 0           | 0           | 0           | 0           | 0           | 0           | 0           | 0           | 0           |
| DN2_CHH         | 0           | 0           | 0           | 0           | 0           | 0           | 0           | 0           | 0           |
| DN3_CHH         | 0           | 0           | 1           | 0           | 1           | 0           | 0           | 0           | 0           |
| DN4_CHH         | 0           | 0           | 0           | 0           | 0           | 0           | 0           | 0           | 0           |
| DN5_CHH         | 0           | 0           | 0           | 0           | 0           | 0           | 7           | 0           | 0           |
| Max_rho         | 1.5E+00     | 1.1E-02     | 4.6E-01     | 6.4E-02     | 8.0E-02     | 1.9E-01     | 5.1E-01     | 4.6E-01     | 1.4E+00     |
| Ks              | 5.4E-01     | 6.4E-01     | 5.4E-01     | 4.3E-01     | 6.5E-01     | 5.3E-01     | 7.7E-01     | 6.0E-01     | 2.8E-01     |
| Taxa            | 18          | 16          | 12          | 12          | 9           | 10          | 12          | 16          | 7           |
| α               | 4.4E-01     | -2.7E+00    | 1.0E+00     | -1.6E+00    | 1.1E-01     | -2.1E-02    | 1.0E+00     | 1.0E+00     | 0.0E+00     |
| Mean_Expression | 2.4E+02     | 6.1E+01     | 1.0E+02     | 4.9E+01     | 6.4E+01     | 1.4E+02     | 1.7E+02     | 5.7E+01     | 1.2E+02     |

| Common_High |
|-------------|-------------|-------------|-------------|-------------|-------------|-------------|-------------|-------------|-------------|
| At_F0182    | At_F0190    | At_F0194    | At_F0207    | At_F0211    | At_F0214    | At_F0220    | At_F0221    | At_F0225    | At_F0230    |
| -           | -           | -           | -           | -           | -           | -           | -           | -           | -           |
| 1.0E-02     | 2.6E-03     | 1.8E-03     | 2.4E-03     | 1.5E-02     | 9.0E-03     | 5.1E-03     | 8.5E-03     | 6.2E-03     | 9.4E-03     |
| 8.0E-03     | 1.0E-03     | 9.3E-04     | 5.2E-03     | 5.0E-03     | 6.4E-03     | 2.7E-03     | 2.0E-03     | 4.1E-03     | 1.0E-03     |
| 3.9E-03     | 1.6E-03     | 1.0E-03     | 5.8E-03     | 1.4E-02     | 6.1E-03     | 2.1E-03     | 2.9E-03     | 3.6E-03     | 2.3E-03     |
| 1.4E-01     | 6.6E-02     | 2.6E-02     | 4.4E-02     | 1.5E-01     | 1.7E-01     | 1.2E-01     | 1.6E-01     | 7.2E-02     | 1.1E-01     |
| 6.4E-02     | 3.2E-02     | 2.9E-02     | 3.9E-02     | 4.3E-02     | 5.3E-02     | 4.6E-02     | 3.4E-02     | 4.5E-02     | 2.6E-02     |
| 7.5E-02     | 4.4E-02     | 2.5E-02     | 3.7E-02     | 1.2E-01     | 6.5E-02     | 8.3E-02     | 8.2E-02     | 5.6E-02     | 4.9E-02     |
| 0.0E+00     | 1.8E+01     | 1.2E+01     | 0.0E+00     | 1.5E+01     | 1.7E+01     | 6.1E+00     | 1.2E+01     | 8.6E+00     | 8.2E+00     |
| 0           | 0           | 0           | 0           | 0           | 0           | 1           | 0           | 0           | 0           |
| 0           | 0           | 1           | 0           | 0           | 0           | 0           | 0           | 0           | 0           |
| 0           | 0           | 0           | 0           | 0           | 60          | 0           | 71          | 0           | 0           |
| 0           | 0           | 6           | 0           | 0           | 50          | 0           | 0           | 0           | 0           |
| 0           | 7           | 0           | 0           | 0           | 3           | 0           | 0           | 0           | 0           |
| 0           | 0           | 0           | 0           | 0           | 0           | 0           | 0           | 0           | 0           |
| 0           | 0           | 0           | 0           | 0           | 0           | 0           | 0           | 0           | 0           |
| 0           | 0           | 0           | 0           | 0           | 0           | 0           | 0           | 0           | 0           |
| 0           | 0           | 0           | 0           | 15          | 0           | 23          | 25          | 0           | 0           |
| 0           | 15          | 4           | 0           | 20          | 6           | 0           | 18          | 5           | 0           |
| 0           | 58          | 40          | 0           | 13          | 56          | 0           | 0           | 53          | 21          |
| 0           | 60          | 60          | 0           | 63          | 57          | 0           | 0           | 40          | 63          |
| 0           | 0           | 0           | 0           | 0           | 60          | 0           | 0           | 0           | 0           |
| 0           | 17          | 0           | 0           | 0           | 0           | 0           | 0           | 0           | 0           |
| 0           | 0           | 31          | 0           | 0           | 19          | 0           | 0           | 0           | 0           |
| 0           | 50          | 0           | 0           | 0           | 0           | 0           | 0           | 0           | 0           |
| 0           | 0           | 0           | 0           | 0           | 60          | 0           | 0           | 0           | 67          |
| 0           | 0           | 0           | 0           | 0           | 0           | 0           | 0           | 0           | 0           |
| 0           | 0           | 0           | 0           | 0           | 0           | 0           | 0           | 0           | 0           |
| 0           | 0           | 0           | 0           | 0           | 0           | 0           | 0           | 0           | 0           |
| 0           | 0           | 0           | 0           | 0           | 0           | 0           | 0           | 0           | 0           |
| 0           | 0           | 0           | 0           | 0           | 0           | 0           | 0           | 0           | 0           |
| 0           | 0           | 0           | 0           | 0           | 0           | 0           | 0           | 0           | 0           |
| 0           | 0           | 0           | 0           | 2           | 0           | 0           | 0           | 0           | 0           |
| 0           | 0           | 0           | 0           | 0           | 0           | 0           | 0           | 0           | 0           |
| 0           | 0           | 0           | 0           | 0           | 0           | 8           | 0           | 0           | 0           |
| 0           | 0           | 0           | 0           | 0           | 0           | 0           | 0           | 0           | 0           |
| 0           | 0           | 0           | 0           | 0           | 0           | 0           | 0           | 0           | 0           |
| 0           | 0           | 0           | 0           | 0           | 0           | 0           | 0           | 0           | 0           |
| 0           | 0           | 0           | 0           | 0           | 0           | 0           | 0           | 0           | 0           |
| 0           | 0           | 0           | 0           | 0           | 0           | 0           | 0           | 0           | 0           |
| 0           | 0           | 0           | 0           | 0           | 0           | 0           | 0           | 0           | 0           |
| 0           | 0           | 0           | 0           | 0           | 0           | 0           | 0           | 0           | 0           |
| 0           | 0           | 0           | 0           | 0           | 0           | 0           | 0           | 0           | 17          |
| 0           | 0           | 0           | 0           | 0           | 0           | 0           | 0           | 0           | 0           |
| 0           | 0           | 0           | 0           | 0           | 2           | 0           | 0           | 0           | 0           |
| 0           | 0           | 0           | 0           | 0           | 0           | 0           | 0           | 0           | 0           |
| 0           | 0           | 0           | 0           | 0           | 0           | 0           | 0           | 0           | 0           |
| 0           | 0           | 0           | 0           | 0           | 0           | 0           | 0           | 0           | 0           |
| 0           | 0           | 0           | 0           | 0           | 0           | 0           | 0           | 0           | 0           |
| 0           | 0           | 0           | 0           | 0           | 0           | 0           | 0           | 0           | 0           |
| 0           | 0           | 0           | 0           | 1           | 0           | 0           | 0           | 0           | 0           |
| 0           | 0           | 0           | 0           | 0           | 0           | 0           | 0           | 0           | 0           |
| 0           | 0           | 4           | 0           | 0           | 0           | 2           | 0           | 0           | 0           |
| 0           | 0           | 0           | 0           | 0           | 0           | 0           | 0           | 0           | 0           |
| 6           | 0           | 0           | 0           | 0           | 0           | 2           | 0           | 0           | 0           |
| 0           | 0           | 0           | 0           | 0           | 0           | 0           | 0           | 0           | 0           |
| 0           | 0           | 0           | 0           | 0           | 0           | 0           | 0           | 0           | 2           |
| 0           | 0           | 0           | 0           | 0           | 0           | 0           | 0           | 0           | 0           |
| 1.5E-01     | 1.5E-01     | 1.2E-01     | 0.0E+00     | 4.0E-01     | 8.6E-01     | 8.9E-01     | 2.5E-01     | 1.9E-01     | 1.6E+00     |
| 9.4E-01     | 4.3E-01     | 2.1E-01     | 8.9E-02     | 6.4E-01     | 4.5E-01     | 1.3E-01     | 1.4E-01     | 4.4E-01     | 5.3E-01     |
| 14          | 16          | 5           | 14          | 17          | 13          | 15          | 15          | 7           | 8           |
| -1.6E-01    | 1.0E+00     | -5.8E-01    | 3.0E-01     | 8.8E-01     | -1.3E-01    | 8.8E-01     | -3.0E-01    | 5.9E-01     | 2.6E-02     |
| 4.2E+01     | 5.4E+01     | 1.0E+02     | 4.2E+01     | 1.7E+02     | 1.0E+02     | 7.4E+01     | 7.4E+01     | 6.8E+01     | 1.1E+02     |

| Common_High<br>At_F0234 | Common_High<br>At_F0264 | Common_High<br>At_F0269 | Common_High<br>At_F0283 | Common_High<br>At_F0302 | Common_High<br>At_F0304 | Common_High<br>At_F0313 | Common_High<br>At_F0318 | Common_High<br>At_F0323 | Common_High<br>At_F0338 |
|-------------------------|-------------------------|-------------------------|-------------------------|-------------------------|-------------------------|-------------------------|-------------------------|-------------------------|-------------------------|
| -                       | -                       | -                       | -                       | -                       | -                       | bm                      | -                       | -                       | bm                      |
| 8.6E-04                 | 9.3E-03                 | 3.3E-03                 | 1.3E-02                 | 3.1E-03                 | 4.4E-03                 | 2.0E-03                 | 5.5E-03                 | 6.9E-03                 | 2.0E-03                 |
| 1.2E-04                 | 1.3E-03                 | 3.2E-03                 | 1.8E-02                 | 7.7E-03                 | 1.1E-03                 | 4.1E-03                 | 3.0E-03                 | 3.2E-03                 | 9.6E-04                 |
| 2.5E-03                 | 2.3E-03                 | 1.9E-03                 | 7.6E-03                 | 9.1E-03                 | 6.5E-03                 | 3.7E-03                 | 6.7E-03                 | 3.4E-03                 | 9.5E-04                 |
| 3.1E-02                 | 1.5E-01                 | 5.5E-02                 | 1.1E-01                 | 5.5E-02                 | 5.8E-02                 | 4.3E-02                 | 6.2E-02                 | 5.4E-02                 | 4.3E-02                 |
| 1.8E-02                 | 3.4E-02                 | 3.7E-02                 | 7.7E-02                 | 5.7E-02                 | 2.5E-02                 | 3.8E-02                 | 2.1E-02                 | 2.8E-02                 | 1.6E-02                 |
| 4.8E-02                 | 5.8E-02                 | 2.9E-02                 | 7.0E-02                 | 6.8E-02                 | 1.0E-01                 | 5.7E-02                 | 4.3E-02                 | 4.4E-02                 | 2.1E-02                 |
| 0.0E+00                 | 9.8E-01                 | 0.0E+00                 | 1.6E+01                 | 1.8E+01                 | 6.6E+00                 | 2.7E+01                 | 7.5E+00                 | 8.8E+00                 | 3.1E+01                 |
| 0                       | 0                       | 0                       | 0                       | 0                       | 0                       | 0                       | 0                       | 0                       | 0                       |
| 0                       | 0                       | 0                       | 1                       | 1                       | 0                       | 0                       | 0                       | 1                       | 0                       |
| 0                       | 0                       | 0                       | 0                       | 67                      | 0                       | 0                       | 0                       | 0                       | 50                      |
| 0                       | 40                      | 0                       | 8                       | 46                      | 0                       | 0                       | 0                       | 0                       | 33                      |
| 0                       | 5                       | 0                       | 38                      | 29                      | 23                      | 0                       | 0                       | 0                       | 8                       |
| 0                       | 0                       | 0                       | 8                       | 8                       | 50                      | 0                       | 0                       | 0                       | 78                      |
| 0                       | 0                       | 0                       | 90                      | 100                     | 50                      | 0                       | 0                       | 0                       | 50                      |
| 0                       | 0                       | 0                       | 0                       | 0                       | 0                       | 0                       | 0                       | 0                       | 80                      |
| 0                       | 0                       | 0                       | 0                       | 3                       | 0                       | 0                       | 19                      | 10                      | 33                      |
| 0                       | 4                       | 0                       | 11                      | 32                      | 0                       | 22                      | 7                       | 9                       | 23                      |
| 0                       | 0                       | 0                       | 32                      | 32                      | 54                      | 35                      | 0                       | 8                       | 10                      |
| 0                       | 0                       | 0                       | 91                      | 70                      | 25                      | 36                      | 24                      | 21                      | 50                      |
| 0                       | 0                       | 0                       | 0                       | 60                      | 0                       | 0                       | 0                       | 0                       | 0                       |
| 0                       | 0                       | 0                       | 0                       | 0                       | 0                       | 0                       | 0                       | 0                       | 0                       |
| 0                       | 0                       | 0                       | 0                       | 21                      | 27                      | 0                       | 0                       | 24                      | 0                       |
| 0                       | 0                       | 0                       | 0                       | 44                      | 29                      | 0                       | 0                       | 0                       | 0                       |
| 0                       | 0                       | 0                       | 0                       | 100                     | 100                     | 0                       | 0                       | 0                       | 0                       |
| 0                       | 0                       | 0                       | 0                       | 0                       | 0                       | 0                       | 0                       | 0                       | 0                       |
| 0                       | 0                       | 0                       | 0                       | 0                       | 0                       | 0                       | 0                       | 0                       | 0                       |
| 0                       | 0                       | 0                       | 0                       | 0                       | 0                       | 0                       | 0                       | 0                       | 0                       |
| 0                       | 0                       | 0                       | 0                       | 0                       | 0                       | 0                       | 0                       | 0                       | 0                       |
| 0                       | 0                       | 0                       | 0                       | 0                       | 0                       | 0                       | 0                       | 0                       | 0                       |
| 0                       | 0                       | 0                       | 0                       | 0                       | 0                       | 0                       | 0                       | 0                       | 0                       |
| 0                       | 0                       | 0                       | 0                       | 0                       | 0                       | 0                       | 0                       | 0                       | 0                       |
| 0                       | 0                       | 0                       | 0                       | 0                       | 0                       | 0                       | 0                       | 0                       | 0                       |
| 0                       | 0                       | 0                       | 0                       | 0                       | 0                       | 0                       | 0                       | 0                       | 0                       |
| 0                       | 0                       | 0                       | 0                       | 0                       | 0                       | 0                       | 0                       | 0                       | 0                       |
| 0                       | 0                       | 0                       | 0                       | 0                       | 0                       | 0                       | 0                       | 0                       | 0                       |
| 0                       | 0                       | 0                       | 0                       | 0                       | 0                       | 6                       | 0                       | 0                       | 0                       |
| 0                       | 0                       | 0                       | 0                       | 0                       | 20                      | 0                       | 0                       | 0                       | 0                       |
| 0                       | 0                       | 0                       | 0                       | 0                       | 50                      | 0                       | 0                       | 0                       | 0                       |
| 0                       | 0                       | 0                       | 0                       | 0                       | 0                       | 0                       | 0                       | 0                       | 0                       |
| 0                       | 0                       | 0                       | 0                       | 0                       | 0                       | 0                       | 0                       | 0                       | 0                       |
| 0                       | 0                       | 0                       | 0                       | 0                       | 0                       | 0                       | 0                       | 1                       | 0                       |
| 0                       | 3                       | 0                       | 0                       | 2                       | 0                       | 0                       | 0                       | 0                       | 0                       |
| 0                       | 0                       | 0                       | 0                       | 0                       | 0                       | 0                       | 0                       | 8                       | 0                       |
| 0                       | 0                       | 0                       | 2                       | 0                       | 0                       | 0                       | 0                       | 3                       | 0                       |
| 0                       | 0                       | 0                       | 0                       | 0                       | 0                       | 0                       | 0                       | 0                       | 0                       |
| 0                       | 1                       | 0                       | 0                       | 0                       | 0                       | 0                       | 0                       | 0                       | 0                       |
| 0                       | 0                       | 0                       | 0                       | 2                       | 0                       | 0                       | 0                       | 0                       | 0                       |
| 0                       | 0                       | 0                       | 0                       | 0                       | 0                       | 0                       | 0                       | 0                       | 0                       |
| 0                       | 0                       | 0                       | 0                       | 0                       | 0                       | 0                       | 0                       | 0                       | 0                       |
| 0                       | 0                       | 0                       | 0                       | 0                       | 0                       | 0                       | 0                       | 0                       | 0                       |
| 0                       | 0                       | 0                       | 0                       | 0                       | 0                       | 0                       | 0                       | 0                       | 0                       |
| 0                       | 0                       | 0                       | 0                       | 0                       | 0                       | 0                       | 0                       | 0                       | 0                       |
| 0                       | 0                       | 0                       | 0                       | 0                       | 0                       | 0                       | 0                       | 0                       | 0                       |
| 0                       | 0                       | 0                       | 0                       | 0                       | 0                       | 0                       | 0                       | 0                       | 0                       |
| 0                       | 0                       | 0                       | 0                       | 0                       | 18                      | 0                       | 0                       | 0                       | 0                       |
| 8.2E-01                 | 1.2E-01                 | 0.0E+00                 | 2.6E-01                 | 1.7E-01                 | 5.5E-01                 | 1.9E-01                 | 5.2E-01                 | 4.0E-01                 | 1.2E-01                 |
| 3.1E-01                 | 5.1E-01                 | 4.5E-01                 | 3.2E-01                 | 6.3E-01                 | 3.6E-01                 | 4.4E-01                 | 4.2E-01                 | 3.9E-01                 | 2.8E-01                 |
| 15                      | 16                      | 9                       | 15                      | 17                      | 7                       | 17                      | 18                      | 16                      | 16                      |
| 1.0E+00                 | -1.9E+00                | 1.0E+00                 | 5.1E-01                 | -1.3E+00                | -1.7E+00                | 6.8E-01                 | 2.8E-01                 | -7.4E-02                | -4.0E-01                |
| 1.0E+02                 | 1.1E+02                 | 3.2E+01                 | 1.3E+02                 | 1.7E+01                 | 1.8E+02                 | 1.3E+02                 | 1.5E+02                 | 5.0E+01                 | 5.5E+01                 |

| Common_High |
|-------------|-------------|-------------|-------------|-------------|-------------|-------------|-------------|-------------|-------------|
| At_F0354    | At_F0357    | At_F0360    | At_F0362    | At_F0364    | At_F0365    | At_F0409    | At_F0416    | At_F0418    | At_F0429    |
| -           | bm          | -           | -           | -           | -           | -           | -           | bm          | -           |
| 3.3E-03     | 8.9E-04     | 7.8E-03     | 1.1E-03     | 3.4E-03     | 4.7E-03     | 1.9E-03     | 4.1E-03     | 3.5E-03     | 1.8E-03     |
| 3.0E-03     | 9.2E-04     | 7.2E-03     | 1.2E-03     | 2.2E-03     | 2.1E-03     | 1.3E-03     | 2.6E-03     | 1.5E-03     | 3.6E-03     |
| 1.8E-03     | 7.4E-04     | 2.6E-03     | 3.4E-04     | 5.9E-03     | 5.5E-03     | 1.2E-03     | 3.0E-03     | 2.1E-03     | 3.6E-03     |
| 7.4E-02     | 2.8E-02     | 9.4E-02     | 3.2E-02     | 3.9E-02     | 6.0E-02     | 4.2E-02     | 5.8E-02     | 4.9E-02     | 4.2E-02     |
| 5.1E-02     | 1.7E-02     | 5.3E-02     | 2.4E-02     | 1.8E-02     | 2.2E-02     | 2.7E-02     | 4.6E-02     | 2.3E-02     | 4.3E-02     |
| 2.3E-02     | 2.5E-02     | 8.7E-02     | 2.3E-02     | 3.9E-02     | 5.4E-02     | 4.2E-02     | 4.0E-02     | 3.5E-02     | 6.4E-02     |
| 0.0E+00     | 2.0E+01     | 0.0E+00     | 3.0E+01     | 6.1E+00     | 0.0E+00     | 4.9E+00     | 1.4E+01     | 2.8E+01     | 1.8E+01     |
| 0           | 0           | 0           | 0           | 0           | 0           | 0           | 0           | 0           | 0           |
| 0           | 0           | 0           | 0           | 1           | 0           | 0           | 0           | 0           | 0           |
| 0           | 0           | 0           | 0           | 0           | 0           | 0           | 0           | 75          | 0           |
| 0           | 0           | 0           | 0           | 0           | 0           | 0           | 0           | 45          | 0           |
| 0           | 0           | 0           | 0           | 0           | 0           | 0           | 0           | 13          | 0           |
| 0           | 0           | 0           | 0           | 7           | 0           | 0           | 0           | 37          | 0           |
| 0           | 0           | 0           | 0           | 0           | 0           | 0           | 0           | 63          | 0           |
| 0           | 0           | 0           | 0           | 0           | 0           | 0           | 0           | 0           | 0           |
| 0           | 0           | 0           | 38          | 6           | 0           | 0           | 0           | 22          | 0           |
| 0           | 6           | 0           | 4           | 0           | 0           | 0           | 6           | 21          | 28          |
| 0           | 52          | 0           | 35          | 7           | 0           | 0           | 29          | 28          | 23          |
| 0           | 63          | 0           | 50          | 25          | 0           | 56          | 50          | 60          | 43          |
| 0           | 0           | 0           | 0           | 0           | 0           | 0           | 0           | 0           | 0           |
| 0           | 0           | 0           | 0           | 0           | 0           | 0           | 0           | 0           | 0           |
| 0           | 0           | 0           | 0           | 0           | 0           | 0           | 0           | 5           | 0           |
| 0           | 55          | 0           | 0           | 0           | 0           | 25          | 0           | 0           | 0           |
| 80          | 75          | 0           | 0           | 0           | 0           | 0           | 0           | 0           | 0           |
| 0           | 0           | 0           | 0           | 0           | 0           | 0           | 0           | 0           | 0           |
| 0           | 0           | 0           | 0           | 0           | 0           | 0           | 0           | 0           | 0           |
| 0           | 0           | 0           | 0           | 0           | 0           | 0           | 0           | 0           | 0           |
| 0           | 0           | 0           | 0           | 0           | 0           | 0           | 0           | 0           | 0           |
| 0           | 0           | 0           | 0           | 0           | 0           | 0           | 0           | 0           | 0           |
| 0           | 0           | 0           | 0           | 0           | 0           | 0           | 0           | 0           | 0           |
| 0           | 0           | 0           | 0           | 0           | 0           | 0           | 0           | 0           | 0           |
| 0           | 0           | 0           | 0           | 0           | 0           | 0           | 0           | 0           | 0           |
| 0           | 0           | 0           | 0           | 0           | 0           | 0           | 0           | 0           | 0           |
| 0           | 0           | 0           | 0           | 0           | 0           | 0           | 0           | 0           | 0           |
| 0           | 0           | 0           | 0           | 0           | 0           | 0           | 0           | 0           | 0           |
| 0           | 0           | 0           | 0           | 0           | 0           | 0           | 0           | 0           | 0           |
| 0           | 0           | 0           | 0           | 0           | 0           | 0           | 0           | 0           | 0           |
| 0           | 0           | 0           | 0           | 0           | 0           | 0           | 6           | 0           | 0           |
| 0           | 0           | 0           | 0           | 0           | 0           | 0           | 0           | 0           | 0           |
| 0           | 0           | 0           | 0           | 0           | 0           | 0           | 0           | 0           | 0           |
| 0           | 0           | 0           | 0           | 0           | 17          | 0           | 0           | 0           | 0           |
| 0           | 0           | 6           | 0           | 0           | 0           | 0           | 0           | 0           | 0           |
| 0           | 0           | 0           | 0           | 0           | 0           | 0           | 1           | 0           | 0           |
| 0           | 0           | 0           | 0           | 0           | 0           | 0           | 0           | 0           | 0           |
| 0           | 0           | 0           | 0           | 0           | 0           | 0           | 0           | 0           | 0           |
| 0           | 0           | 0           | 0           | 0           | 0           | 0           | 0           | 0           | 0           |
| 0           | 0           | 0           | 0           | 0           | 0           | 0           | 0           | 0           | 0           |
| 0           | 0           | 0           | 0           | 0           | 0           | 0           | 0           | 0           | 0           |
| 0           | 0           | 0           | 0           | 0           | 0           | 0           | 0           | 0           | 0           |
| 0           | 0           | 0           | 0           | 0           | 0           | 0           | 0           | 0           | 0           |
| 0           | 0           | 0           | 0           | 1           | 1           | 0           | 0           | 0           | 0           |
| 0           | 0           | 0           | 0           | 0           | 0           | 0           | 0           | 0           | 0           |
| 0           | 0           | 0           | 0           | 0           | 0           | 0           | 0           | 0           | 0           |
| 0           | 0           | 0           | 0           | 0           | 0           | 0           | 0           | 0           | 0           |
| 0           | 0           | 0           | 0           | 0           | 0           | 0           | 0           | 0           | 0           |
| 0           | 0           | 0           | 0           | 0           | 0           | 0           | 0           | 0           | 0           |
| 0           | 0           | 0           | 0           | 0           | 0           | 0           | 0           | 0           | 0           |
| 0           | 0           | 0           | 0           | 0           | 0           | 0           | 0           | 0           | 0           |
| 0           | 0           | 0           | 0           | 0           | 0           | 0           | 0           | 0           | 0           |
| 0           | 0           | 0           | 0           | 0           | 0           | 1           | 2           | 0           | 0           |
| 0           | 0           | 0           | 0           | 0           | 0           | 0           | 0           | 0           | 0           |
| 0           | 0           | 6           | 0           | 0           | 0           | 0           | 0           | 0           | 0           |
| 6.1E-02     | 9.8E-02     | 3.4E-01     | 6.7E-02     | 6.9E-02     | 7.5E-02     | 6.7E-02     | 2.2E-01     | 6.7E-02     | 2.0E-01     |
| 2.9E-01     | 5.8E-01     | 5.5E-01     | 4.8E-01     | 5.2E-01     | 1.6E-01     | 6.2E-01     | 4.4E-02     | 4.8E-01     | 5.2E-01     |
| 17          | 16          | 16          | 17          | 10          | 17          | 15          | 18          | 18          | 17          |
| 8.5E-01     | -6.7E-01    | 7.0E-01     | -1.2E-01    | -4.6E-01    | -3.1E+00    | -2.4E+00    | 9.0E-01     | 3.0E-01     | -1.7E-01    |
| 1.8E+02     | 3.8E+01     | 6.6E+01     | 1.9E+02     | 8.1E+01     | 3.1E+00     | 1.0E+02     | 3.7E+02     | 1.3E+02     | 5.1E+01     |

| Common_High |
|-------------|-------------|-------------|-------------|-------------|-------------|-------------|-------------|-------------|-------------|
| At_F0442    | At_F0445    | At_F0446    | At_F0451    | At_F0466    | At_F0469    | At_F0474    | At_F0477    | At_F0482    | At_F0485    |
| -           | -           | -           | bm          | bm          | -           | -           | -           | bm          | -           |
| 1.1E-03     | 9.0E-04     | 1.3E-02     | 1.8E-03     | 2.6E-03     | 4.3E-03     | 1.2E-02     | 2.9E-03     | 2.6E-03     | 1.2E-03     |
| 1.3E-03     | 5.9E-04     | 1.1E-02     | 4.9E-04     | 1.5E-03     | 3.7E-03     | 1.5E-03     | 2.1E-03     | 2.6E-03     | 8.2E-04     |
| 2.9E-03     | 1.1E-03     | 6.3E-03     | 2.0E-03     | 5.7E-03     | 3.0E-03     | 3.1E-03     | 2.5E-03     | 6.4E-03     | 1.8E-03     |
| 4.1E-02     | 3.6E-02     | 1.1E-01     | 4.4E-02     | 5.4E-02     | 5.4E-02     | 1.6E-01     | 5.7E-02     | 6.4E-02     | 4.3E-02     |
| 2.8E-02     | 2.3E-02     | 7.6E-02     | 1.6E-02     | 3.2E-02     | 4.4E-02     | 1.8E-02     | 4.3E-02     | 2.9E-02     | 2.1E-02     |
| 5.4E-02     | 6.3E-02     | 1.1E-01     | 3.8E-02     | 6.3E-02     | 6.4E-02     | 3.4E-02     | 8.1E-02     | 7.1E-02     | 4.4E-02     |
| 9.1E+00     | 9.0E+00     | 1.8E+01     | 2.5E+01     | 3.6E+01     | 5.6E+00     | 2.5E+01     | 0.0E+00     | 3.4E+01     | 3.0E+01     |
| 1           | 0           | 0           | 0           | 0           | 0           | 0           | 0           | 0           | 2           |
| 0           | 0           | 1           | 0           | 1           | 0           | 0           | 0           | 0           | 1           |
| 0           | 0           | 14          | 0           | 100         | 0           | 0           | 0           | 0           | 0           |
| 0           | 0           | 18          | 20          | 39          | 0           | 7           | 0           | 0           | 0           |
| 0           | 0           | 21          | 27          | 35          | 0           | 28          | 0           | 0           | 0           |
| 0           | 0           | 18          | 56          | 26          | 0           | 0           | 0           | 0           | 0           |
| 0           | 0           | 40          | 100         | 0           | 0           | 0           | 0           | 0           | 0           |
| 0           | 0           | 17          | 21          | 100         | 0           | 0           | 0           | 88          | 0           |
| 0           | 0           | 17          | 32          | 48          | 0           | 23          | 0           | 20          | 0           |
| 0           | 0           | 16          | 22          | 32          | 0           | 22          | 0           | 26          | 24          |
| 14          | 35          | 25          | 33          | 36          | 33          | 42          | 0           | 39          | 46          |
| 50          | 0           | 40          | 21          | 0           | 10          | 25          | 0           | 45          | 69          |
| 0           | 0           | 0           | 0           | 0           | 0           | 0           | 0           | 0           | 0           |
| 0           | 0           | 0           | 0           | 0           | 0           | 0           | 0           | 0           | 0           |
| 0           | 0           | 0           | 0           | 0           | 0           | 0           | 0           | 43          | 0           |
| 0           | 0           | 0           | 0           | 0           | 0           | 0           | 0           | 14          | 0           |
| 0           | 7           | 0           | 0           | 0           | 0           | 0           | 40          | 0           | 0           |
| 0           | 0           | 0           | 0           | 0           | 0           | 50          | 0           | 0           | 0           |
| 0           | 0           | 0           | 0           | 0           | 0           | 33          | 0           | 0           | 0           |
| 0           | 0           | 0           | 0           | 0           | 0           | 17          | 0           | 0           | 0           |
| 0           | 0           | 0           | 0           | 0           | 0           | 0           | 0           | 0           | 0           |
| 0           | 0           | 0           | 0           | 0           | 0           | 0           | 0           | 0           | 0           |
| 0           | 0           | 0           | 0           | 0           | 0           | 0           | 0           | 0           | 0           |
| 0           | 0           | 0           | 0           | 0           | 0           | 0           | 0           | 0           | 5           |
| 0           | 0           | 0           | 0           | 0           | 0           | 0           | 0           | 0           | 0           |
| 2           | 0           | 0           | 0           | 0           | 0           | 0           | 0           | 0           | 2           |
| 0           | 0           | 0           | 0           | 0           | 0           | 0           | 0           | 0           | 0           |
| 0           | 0           | 0           | 0           | 0           | 0           | 0           | 0           | 0           | 0           |
| 0           | 0           | 0           | 0           | 0           | 0           | 0           | 0           | 0           | 0           |
| 0           | 0           | 0           | 0           | 0           | 0           | 0           | 0           | 0           | 0           |
| 0           | 0           | 0           | 0           | 0           | 0           | 0           | 0           | 0           | 0           |
| 0           | 0           | 0           | 0           | 0           | 0           | 0           | 0           | 0           | 0           |
| 0           | 0           | 0           | 0           | 0           | 0           | 0           | 0           | 0           | 0           |
| 0           | 0           | 0           | 0           | 0           | 0           | 0           | 0           | 0           | 0           |
| 0           | 0           | 0           | 0           | 0           | 0           | 0           | 0           | 0           | 0           |
| 0           | 0           | 0           | 0           | 0           | 0           | 0           | 0           | 0           | 0           |
| 0           | 0           | 0           | 0           | 0           | 0           | 0           | 0           | 0           | 0           |
| 0           | 0           | 0           | 0           | 0           | 0           | 0           | 0           | 0           | 0           |
| 0           | 0           | 0           | 0           | 0           | 0           | 0           | 0           | 0           | 0           |
| 0           | 0           | 0           | 0           | 0           | 0           | 0           | 0           | 0           | 0           |
| 0           | 0           | 0           | 0           | 0           | 0           | 0           | 0           | 0           | 0           |
| 0           | 0           | 0           | 0           | 0           | 0           | 0           | 0           | 0           | 0           |
| 0           | 9           | 2           | 0           | 0           | 0           | 3           | 0           | 0           | 0           |
| 0           | 0           | 0           | 0           | 0           | 0           | 0           | 0           | 0           | 0           |
| 2           | 0           | 0           | 0           | 0           | 0           | 0           | 0           | 0           | 0           |
| 0           | 2           | 0           | 0           | 0           | 0           | 0           | 0           | 0           | 0           |
| 0           | 0           | 0           | 0           | 3           | 0           | 1           | 0           | 0           | 0           |
| 0           | 0           | 1           | 1           | 0           | 0           | 0           | 0           | 0           | 0           |
| 0           | 0           | 0           | 0           | 0           | 0           | 0           | 0           | 0           | 1           |
| 0           | 0           | 0           | 0           | 0           | 0           | 0           | 0           | 0           | 0           |
| 0           | 0           | 0           | 0           | 0           | 3           | 0           | 0           | 0           | 0           |
| 0           | 0           | 0           | 0           | 0           | 4           | 0           | 0           | 0           | 0           |
| 1           | 0           | 1           | 0           | 0           | 0           | 0           | 0           | 0           | 0           |
| 0           | 0           | 0           | 0           | 0           | 0           | 0           | 0           | 0           | 0           |
| 0           | 0           | 0           | 0           | 0           | 0           | 0           | 0           | 3           | 0           |
| 3.5E-01     | 2.6E-01     | 1.8E+00     | 8.4E-02     | 9.7E-02     | 3.0E-01     | 5.3E-02     | 6.9E-02     | 3.9E-02     | 1.8E-01     |
| 6.4E-01     | 7.9E-01     | 6.0E-01     | 3.0E-01     | 7.7E-01     | 5.6E-01     | 5.1E-01     | 5.2E-01     | 8.7E-01     | 6.1E-01     |
| 18          | 17          | 11          | 16          | 16          | 16          | 15          | 14          | 15          | 16          |
| -1.1E+00    | -3.3E+01    | 4.5E-01     | -2.2E+00    | -3.5E+01    | 3.8E-01     | 1.0E+00     | -1.8E+01    | -2.5E+00    | -2.6E+00    |
| 2.9E+02     | 7.3E+01     | 3.3E+01     | 7.9E+01     | 9.2E+01     | 1.0E+02     | 7.9E+01     | 1.1E+02     | 2.9E+02     | 2.2E+02     |

| Common_High |
|-------------|-------------|-------------|-------------|-------------|-------------|-------------|-------------|-------------|-------------|
| At_F0500    | At_F0505    | At_F0508    | At_F0509    | At_F0510    | At_F0514    | At_F0516    | At_F0529    | At_F0534    | At_F0538    |
| -           | -           | bm          | -           | -           | -           | -           | -           | -           | bm          |
| 4.7E-03     | 2.3E-03     | 2.5E-03     | 2.0E-03     | 5.6E-03     | 3.4E-03     | 2.3E-03     | 7.4E-03     | 3.5E-03     | 2.7E-03     |
| 7.9E-03     | 9.1E-04     | 6.8E-04     | 2.1E-03     | 3.6E-03     | 3.8E-03     | 8.9E-04     | 8.7E-03     | 1.1E-03     | 1.5E-04     |
| 5.4E-03     | 1.7E-03     | 3.7E-03     | 1.9E-03     | 3.2E-03     | 1.3E-02     | 1.3E-03     | 1.9E-02     | 1.8E-03     | 4.1E-03     |
| 5.3E-02     | 5.9E-02     | 5.0E-02     | 3.4E-02     | 1.1E-01     | 5.3E-02     | 5.8E-02     | 6.5E-02     | 4.4E-02     | 5.8E-02     |
| 4.8E-02     | 2.1E-02     | 2.4E-02     | 2.1E-02     | 3.8E-02     | 4.1E-02     | 4.2E-02     | 3.9E-02     | 3.2E-02     | 1.8E-02     |
| 5.2E-02     | 4.9E-02     | 5.5E-02     | 3.5E-02     | 4.9E-02     | 1.3E-01     | 6.7E-02     | 7.7E-02     | 3.3E-02     | 5.4E-02     |
| 0.0E+00     | 2.5E+01     | 2.6E+01     | 4.2E+01     | 1.8E+01     | 0.0E+00     | 9.6E+00     | 1.2E+01     | 1.9E+01     | 4.0E+01     |
| 0           | 0           | 0           | 0           | 0           | 0           | 0           | 2           | 0           | 0           |
| 0           | 0           | 1           | 2           | 0           | 0           | 0           | 0           | 0           | 1           |
| 0           | 0           | 0           | 0           | 50          | 0           | 0           | 0           | 0           | 0           |
| 0           | 0           | 0           | 0           | 0           | 0           | 0           | 18          | 0           | 0           |
| 0           | 0           | 0           | 0           | 17          | 0           | 0           | 10          | 0           | 0           |
| 0           | 0           | 0           | 0           | 42          | 0           | 0           | 0           | 0           | 0           |
| 0           | 0           | 0           | 0           | 0           | 0           | 0           | 0           | 0           | 0           |
| 0           | 0           | 0           | 50          | 0           | 0           | 25          | 0           | 0           | 100         |
| 0           | 0           | 0           | 48          | 0           | 0           | 0           | 17          | 8           | 62          |
| 0           | 5           | 13          | 39          | 0           | 0           | 4           | 11          | 2           | 17          |
| 0           | 44          | 11          | 67          | 5           | 0           | 13          | 36          | 0           | 54          |
| 0           | 86          | 57          | 50          | 100         | 0           | 30          | 50          | 72          | 20          |
| 0           | 0           | 0           | 0           | 0           | 0           | 0           | 0           | 0           | 0           |
| 0           | 0           | 0           | 0           | 0           | 0           | 0           | 19          | 0           | 7           |
| 0           | 0           | 0           | 0           | 0           | 0           | 0           | 21          | 0           | 0           |
| 0           | 0           | 0           | 0           | 0           | 0           | 0           | 12          | 0           | 0           |
| 0           | 0           | 0           | 0           | 0           | 0           | 0           | 0           | 0           | 0           |
| 0           | 0           | 0           | 0           | 0           | 0           | 0           | 0           | 0           | 0           |
| 0           | 0           | 0           | 0           | 8           | 0           | 0           | 0           | 0           | 0           |
| 0           | 0           | 0           | 0           | 25          | 0           | 0           | 0           | 0           | 0           |
| 0           | 0           | 0           | 0           | 0           | 0           | 0           | 0           | 0           | 0           |
| 0           | 0           | 0           | 0           | 0           | 0           | 0           | 6           | 0           | 0           |
| 0           | 0           | 0           | 0           | 0           | 0           | 0           | 0           | 0           | 0           |
| 0           | 0           | 0           | 0           | 0           | 0           | 0           | 0           | 0           | 0           |
| 0           | 0           | 0           | 0           | 0           | 0           | 0           | 0           | 0           | 0           |
| 0           | 0           | 0           | 0           | 0           | 0           | 0           | 0           | 0           | 0           |
| 0           | 0           | 0           | 0           | 0           | 0           | 0           | 0           | 0           | 0           |
| 0           | 0           | 0           | 0           | 0           | 0           | 0           | 0           | 0           | 0           |
| 0           | 0           | 0           | 0           | 0           | 5           | 0           | 0           | 0           | 0           |
| 0           | 0           | 0           | 0           | 0           | 0           | 0           | 0           | 0           | 0           |
| 0           | 0           | 0           | 0           | 0           | 0           | 0           | 0           | 0           | 0           |
| 0           | 0           | 3           | 0           | 0           | 0           | 0           | 0           | 0           | 0           |
| 0           | 0           | 0           | 0           | 0           | 0           | 0           | 0           | 0           | 0           |
| 0           | 0           | 0           | 0           | 9           | 0           | 0           | 0           | 0           | 0           |
| 0           | 0           | 0           | 0           | 10          | 0           | 0           | 0           | 0           | 0           |
| 0           | 5           | 0           | 0           | 3           | 0           | 0           | 0           | 0           | 0           |
| 0           | 0           | 0           | 0           | 0           | 0           | 0           | 0           | 0           | 0           |
| 0           | 0           | 0           | 0           | 0           | 0           | 0           | 0           | 0           | 0           |
| 0           | 0           | 0           | 1           | 0           | 1           | 0           | 0           | 0           | 0           |
| 0           | 0           | 0           | 0           | 0           | 0           | 0           | 0           | 0           | 2           |
| 0           | 0           | 2           | 4           | 0           | 0           | 0           | 0           | 0           | 0           |
| 0           | 0           | 0           | 0           | 0           | 0           | 0           | 0           | 0           | 0           |
| 0           | 0           | 2           | 0           | 0           | 2           | 0           | 0           | 0           | 0           |
| 0           | 0           | 0           | 0           | 0           | 15          | 0           | 0           | 0           | 0           |
| 0           | 0           | 0           | 0           | 0           | 0           | 0           | 1           | 2           | 0           |
| 0           | 0           | 0           | 3           | 3           | 0           | 0           | 0           | 0           | 0           |
| 2.7E+00     | 9.4E-02     | 3.3E-01     | 8.7E-02     | 6.9E-02     | 1.1E-01     | 1.0E+00     | 1.2E+00     | 1.0E-01     | 1.5E-01     |
| 7.0E-01     | 5.0E-01     | 2.7E-01     | 6.1E-01     | 4.2E-01     | 3.2E-01     | 4.2E-01     | 5.1E-01     | 4.4E-01     | 5.2E-01     |
| 15          | 16          | 15          | 15          | 18          | 15          | 15          | 15          | 10          | 14          |
| -7.2E-01    | 1.0E+00     | -6.1E-01    | 1.0E+00     | -1.6E+00    | -1.3E+00    | 1.0E+00     | 4.0E-01     | -1.6E+00    | 1.0E+00     |
| 4.3E+02     | 2.5E+02     | 1.4E+02     | 5.6E+01     | 2.1E+02     | 5.8E+01     | 1.2E+02     | 1.2E+02     | 5.8E+01     | 7.4E+01     |



| Common_High |
|-------------|-------------|-------------|-------------|-------------|-------------|-------------|-------------|-------------|-------------|
| At_F0541    | At_F0542    | At_F0544    | At_F0548    | At_F0553    | At_F0556    | At_F0557    | At_F0558    | At_F0563    | At_F0564    |
| -           | bm          | -           | bm          | -           | bm          | bm          | -           | -           | -           |
| 7.0E-03     | 4.1E-03     | 4.2E-03     | 2.9E-03     | 1.0E-02     | 5.4E-03     | 2.4E-03     | 2.0E-03     | 2.7E-03     | 3.4E-03     |
| 5.1E-03     | 4.6E-03     | 4.4E-03     | 3.6E-04     | 2.1E-03     | 5.1E-04     | 1.1E-03     | 1.1E-03     | 2.1E-03     | 1.4E-03     |
| 7.2E-03     | 3.5E-03     | 3.4E-03     | 1.8E-03     | 1.5E-03     | 1.2E-03     | 1.5E-03     | 3.1E-03     | 1.8E-03     | 1.7E-03     |
| 1.0E-01     | 4.9E-02     | 4.8E-02     | 3.6E-02     | 1.4E-01     | 6.7E-02     | 3.9E-02     | 5.5E-02     | 4.8E-02     | 4.4E-02     |
| 4.6E-02     | 3.6E-02     | 4.1E-02     | 1.9E-02     | 3.2E-02     | 2.0E-02     | 2.5E-02     | 2.9E-02     | 2.2E-02     | 4.4E-02     |
| 7.2E-02     | 6.3E-02     | 4.7E-02     | 3.6E-02     | 3.2E-02     | 3.5E-02     | 4.7E-02     | 7.6E-02     | 3.3E-02     | 3.6E-02     |
| 1.4E+01     | 3.2E+01     | 1.2E+01     | 3.6E+01     | 2.6E+00     | 2.2E+01     | 2.1E+01     | 6.5E+00     | 3.8E+00     | 0.0E+00     |
| 0           | 0           | 0           | 0           | 3           | 0           | 0           | 0           | 0           | 0           |
| 0           | 0           | 0           | 0           | 0           | 1           | 0           | 0           | 0           | 0           |
| 0           | 10          | 0           | 0           | 0           | 0           | 0           | 0           | 0           | 0           |
| 17          | 0           | 0           | 0           | 0           | 0           | 39          | 0           | 0           | 0           |
| 0           | 0           | 0           | 0           | 20          | 0           | 18          | 0           | 0           | 0           |
| 0           | 0           | 0           | 0           | 0           | 0           | 29          | 0           | 0           | 0           |
| 0           | 0           | 0           | 0           | 0           | 0           | 15          | 0           | 0           | 0           |
| 0           | 0           | 0           | 64          | 0           | 0           | 0           | 0           | 0           | 0           |
| 33          | 14          | 0           | 6           | 0           | 12          | 32          | 0           | 0           | 0           |
| 0           | 29          | 0           | 16          | 0           | 10          | 17          | 35          | 0           | 0           |
| 15          | 39          | 0           | 53          | 20          | 44          | 27          | 0           | 12          | 0           |
| 67          | 62          | 69          | 58          | 0           | 69          | 27          | 0           | 44          | 0           |
| 0           | 0           | 0           | 0           | 0           | 0           | 0           | 0           | 0           | 0           |
| 0           | 0           | 0           | 0           | 0           | 0           | 0           | 0           | 0           | 0           |
| 0           | 0           | 0           | 0           | 0           | 0           | 0           | 0           | 0           | 0           |
| 0           | 0           | 0           | 0           | 0           | 0           | 0           | 0           | 0           | 0           |
| 0           | 0           | 0           | 0           | 0           | 0           | 0           | 0           | 0           | 0           |
| 0           | 0           | 0           | 0           | 17          | 0           | 0           | 0           | 0           | 25          |
| 0           | 0           | 0           | 0           | 0           | 0           | 0           | 0           | 0           | 0           |
| 0           | 0           | 0           | 0           | 0           | 0           | 0           | 0           | 0           | 0           |
| 0           | 0           | 0           | 0           | 0           | 0           | 0           | 0           | 0           | 0           |
| 0           | 0           | 0           | 0           | 0           | 0           | 0           | 0           | 0           | 0           |
| 0           | 0           | 0           | 0           | 0           | 0           | 0           | 0           | 0           | 0           |
| 0           | 0           | 0           | 0           | 0           | 0           | 0           | 0           | 0           | 0           |
| 0           | 0           | 0           | 0           | 0           | 0           | 0           | 0           | 0           | 0           |
| 0           | 0           | 0           | 0           | 0           | 0           | 0           | 0           | 0           | 0           |
| 0           | 0           | 0           | 0           | 0           | 0           | 0           | 0           | 0           | 0           |
| 0           | 0           | 0           | 0           | 0           | 0           | 0           | 0           | 0           | 0           |
| 0           | 0           | 0           | 0           | 0           | 0           | 0           | 0           | 0           | 0           |
| 0           | 0           | 0           | 0           | 0           | 0           | 0           | 0           | 0           | 0           |
| 0           | 0           | 0           | 0           | 0           | 0           | 0           | 0           | 0           | 0           |
| 0           | 0           | 0           | 0           | 0           | 0           | 0           | 0           | 0           | 0           |
| 0           | 0           | 0           | 0           | 0           | 0           | 0           | 0           | 0           | 0           |
| 0           | 0           | 0           | 0           | 0           | 0           | 0           | 0           | 0           | 6           |
| 0           | 0           | 0           | 0           | 0           | 0           | 0           | 0           | 0           | 0           |
| 0           | 0           | 0           | 0           | 0           | 0           | 0           | 0           | 0           | 0           |
| 0           | 0           | 2           | 0           | 0           | 0           | 0           | 2           | 0           | 0           |
| 0           | 0           | 0           | 0           | 0           | 0           | 0           | 0           | 0           | 0           |
| 0           | 0           | 0           | 0           | 0           | 0           | 0           | 0           | 0           | 0           |
| 0           | 0           | 0           | 0           | 0           | 0           | 0           | 0           | 0           | 0           |
| 0           | 0           | 0           | 0           | 0           | 0           | 0           | 0           | 0           | 0           |
| 0           | 1           | 0           | 0           | 0           | 0           | 0           | 0           | 0           | 0           |
| 0           | 0           | 0           | 0           | 0           | 2           | 0           | 0           | 1           | 0           |
| 0           | 0           | 0           | 0           | 0           | 0           | 0           | 0           | 0           | 0           |
| 0           | 0           | 0           | 0           | 0           | 0           | 0           | 0           | 0           | 0           |
| 0           | 0           | 0           | 0           | 0           | 0           | 0           | 0           | 0           | 0           |
| 0           | 0           | 0           | 0           | 0           | 0           | 0           | 0           | 0           | 0           |
| 0           | 0           | 0           | 0           | 0           | 0           | 0           | 0           | 0           | 0           |
| 0           | 0           | 0           | 0           | 0           | 0           | 0           | 0           | 0           | 0           |
| 0           | 0           | 0           | 0           | 0           | 0           | 0           | 0           | 0           | 0           |
| 1.2E-01     | 2.2E+00     | 7.3E-01     | 9.7E-02     | 1.1E-01     | 9.5E-02     | 1.2E-01     | 1.1E-01     | 8.0E-02     | 8.5E-02     |
| 7.4E-01     | 5.2E-01     | 6.6E-01     | 4.5E-01     | 6.6E-01     | 1.2E-01     | 7.4E-01     | 4.7E-01     | 5.3E-01     | 4.2E-01     |
| 16          | 15          | 11          | 16          | 16          | 10          | 16          | 15          | 14          | 14          |
| 5.9E-01     | 7.5E-01     | 3.8E-01     | 6.4E-01     | 2.4E-01     | -1.7E+00    | 2.3E-01     | 1.0E+00     | -2.5E-01    | -2.2E+00    |
| 6.4E+01     | 7.1E+01     | 6.1E+01     | 1.7E+02     | 1.6E+02     | 5.3E+01     | 7.3E+01     | 1.1E+02     | 9.5E+01     | 3.4E+02     |

| Common_High |
|-------------|-------------|-------------|-------------|-------------|-------------|-------------|-------------|-------------|-------------|
| At_F0569    | At_F0570    | At_F0575    | At_F0583    | At_F0586    | At_F0588    | At_F0589    | At_F0590    | At_F0609    | At_F0615    |
| -           | -           | bm          | -           | bm          | -           | -           | bm          | bm          | bm          |
| 1.2E-02     | 7.9E-03     | 2.4E-03     | 3.0E-03     | 2.0E-03     | 1.2E-03     | 2.7E-03     | 2.3E-03     | 8.2E-03     | 2.4E-03     |
| 2.6E-03     | 8.6E-04     | 6.4E-04     | 2.1E-03     | 3.5E-04     | 6.9E-04     | 1.2E-03     | 1.4E-03     | 7.6E-04     | 2.2E-03     |
| 5.0E-03     | 2.0E-03     | 2.0E-03     | 2.1E-03     | 2.4E-03     | 1.7E-03     | 3.4E-03     | 1.1E-03     | 9.9E-04     | 3.0E-03     |
| 6.7E-02     | 1.2E-01     | 3.7E-02     | 5.3E-02     | 4.5E-02     | 4.2E-02     | 3.1E-02     | 4.6E-02     | 1.3E-01     | 5.9E-02     |
| 3.2E-02     | 2.3E-02     | 2.5E-02     | 3.3E-02     | 1.5E-02     | 2.4E-02     | 2.6E-02     | 2.7E-02     | 2.2E-02     | 4.3E-02     |
| 6.8E-02     | 4.2E-02     | 4.1E-02     | 3.5E-02     | 3.7E-02     | 3.8E-02     | 5.1E-02     | 3.6E-02     | 3.8E-02     | 4.7E-02     |
| 0.0E+00     | 6.7E+00     | 3.1E+01     | 0.0E+00     | 2.1E+01     | 0.0E+00     | 1.8E+01     | 3.2E+01     | 2.1E+01     | 2.4E+01     |
| 0           | 0           | 0           | 0           | 0           | 0           | 0           | 0           | 0           | 0           |
| 0           | 0           | 0           | 0           | 0           | 0           | 1           | 0           | 0           | 0           |
| 0           | 20          | 0           | 0           | 0           | 0           | 0           | 78          | 50          | 0           |
| 0           | 0           | 0           | 0           | 0           | 0           | 0           | 9           | 50          | 0           |
| 0           | 0           | 0           | 0           | 0           | 0           | 0           | 19          | 0           | 50          |
| 0           | 0           | 0           | 0           | 0           | 0           | 9           | 40          | 0           | 50          |
| 0           | 0           | 0           | 0           | 0           | 0           | 0           | 67          | 0           | 33          |
| 0           | 0           | 17          | 0           | 0           | 0           | 10          | 0           | 0           | 56          |
| 0           | 0           | 35          | 0           | 0           | 0           | 15          | 44          | 38          | 64          |
| 0           | 0           | 36          | 0           | 5           | 0           | 30          | 13          | 24          | 4           |
| 0           | 16          | 24          | 0           | 39          | 0           | 21          | 32          | 0           | 26          |
| 0           | 44          | 33          | 0           | 71          | 0           | 0           | 73          | 33          | 0           |
| 0           | 0           | 0           | 0           | 0           | 0           | 0           | 0           | 0           | 0           |
| 0           | 0           | 0           | 0           | 0           | 0           | 0           | 0           | 0           | 0           |
| 0           | 60          | 0           | 0           | 0           | 0           | 0           | 0           | 43          | 0           |
| 0           | 0           | 0           | 0           | 0           | 0           | 0           | 0           | 0           | 0           |
| 20          | 0           | 0           | 0           | 0           | 0           | 0           | 0           | 0           | 0           |
| 0           | 0           | 0           | 14          | 0           | 0           | 0           | 0           | 33          | 0           |
| 0           | 0           | 0           | 0           | 0           | 0           | 0           | 0           | 0           | 0           |
| 0           | 0           | 0           | 0           | 0           | 0           | 0           | 0           | 0           | 0           |
| 0           | 0           | 0           | 0           | 0           | 0           | 0           | 0           | 0           | 0           |
| 0           | 0           | 0           | 0           | 0           | 0           | 0           | 0           | 0           | 0           |
| 0           | 0           | 0           | 0           | 0           | 0           | 0           | 0           | 0           | 0           |
| 0           | 0           | 0           | 0           | 0           | 0           | 0           | 0           | 0           | 0           |
| 0           | 0           | 0           | 0           | 0           | 0           | 0           | 0           | 0           | 0           |
| 0           | 0           | 0           | 0           | 0           | 0           | 0           | 0           | 0           | 0           |
| 0           | 0           | 0           | 0           | 0           | 0           | 0           | 0           | 0           | 0           |
| 0           | 0           | 0           | 0           | 0           | 0           | 0           | 0           | 0           | 0           |
| 0           | 0           | 0           | 0           | 0           | 0           | 0           | 0           | 0           | 0           |
| 0           | 0           | 0           | 0           | 0           | 0           | 0           | 0           | 0           | 0           |
| 0           | 0           | 0           | 0           | 0           | 0           | 0           | 0           | 0           | 0           |
| 0           | 0           | 0           | 0           | 0           | 0           | 0           | 0           | 0           | 0           |
| 0           | 0           | 0           | 0           | 0           | 0           | 0           | 0           | 0           | 0           |
| 0           | 13          | 0           | 0           | 0           | 0           | 0           | 0           | 13          | 0           |
| 0           | 0           | 0           | 0           | 0           | 0           | 0           | 0           | 0           | 0           |
| 0           | 0           | 2           | 0           | 0           | 0           | 0           | 0           | 0           | 0           |
| 0           | 0           | 0           | 0           | 0           | 0           | 0           | 0           | 0           | 0           |
| 0           | 0           | 8           | 0           | 0           | 0           | 0           | 0           | 0           | 0           |
| 0           | 0           | 0           | 0           | 0           | 0           | 0           | 0           | 0           | 0           |
| 0           | 0           | 0           | 0           | 1           | 0           | 1           | 0           | 0           | 0           |
| 0           | 0           | 0           | 0           | 0           | 0           | 0           | 0           | 0           | 0           |
| 0           | 0           | 0           | 0           | 0           | 0           | 0           | 0           | 0           | 0           |
| 0           | 0           | 0           | 0           | 1           | 0           | 2           | 0           | 0           | 0           |
| 0           | 0           | 0           | 0           | 0           | 0           | 0           | 0           | 0           | 0           |
| 0           | 2           | 0           | 0           | 0           | 0           | 0           | 0           | 2           | 0           |
| 0           | 0           | 0           | 0           | 0           | 0           | 0           | 0           | 0           | 0           |
| 0           | 0           | 0           | 0           | 0           | 0           | 0           | 0           | 0           | 0           |
| 0           | 0           | 0           | 4           | 0           | 0           | 0           | 0           | 0           | 0           |
| 4.8E-01     | 6.6E-02     | 2.5E-01     | 8.2E-02     | 8.2E-02     | 2.7E-01     | 4.5E-02     | 8.4E-02     | 7.7E-02     | 4.9E-01     |
| 5.2E-01     | 6.1E-01     | 5.8E-01     | 4.3E-01     | 4.9E-01     | 6.4E-01     | 4.9E-01     | 6.0E-01     | 4.4E-01     | 5.2E-01     |
| 14          | 17          | 17          | 8           | 17          | 8           | 16          | 9           | 17          | 15          |
| 3.9E-01     | 5.3E-01     | 1.0E+00     | 6.1E-01     | 2.6E-01     | -3.2E+00    | 1.0E+00     | 1.9E-02     | 1.0E+00     | -4.0E-01    |
| 1.6E+02     | 1.2E+02     | 1.5E+02     | 1.4E+02     | 1.6E+02     | 2.2E+01     | 1.2E+02     | 9.9E+01     | 9.3E+01     | 3.4E+01     |

| Common_High |
|-------------|-------------|-------------|-------------|-------------|-------------|-------------|-------------|-------------|-------------|
| At_F0623    | At_F0626    | At_F0628    | At_F0629    | At_F0634    | At_F0641    | At_F0647    | At_F0649    | At_F0653    | At_F0662    |
| -           | bm          | bm          | -           | -           | -           | -           | -           | -           | bm          |
| 1.9E-03     | 1.6E-03     | 2.3E-03     | 1.0E-02     | 3.1E-03     | 1.3E-03     | 1.5E-03     | 1.5E-03     | 4.9E-03     | 6.3E-03     |
| 1.1E-03     | 1.6E-03     | 7.0E-04     | 7.3E-03     | 4.7E-03     | 1.2E-03     | 3.8E-04     | 7.6E-04     | 2.6E-03     | 1.8E-03     |
| 1.8E-03     | 1.7E-03     | 2.4E-03     | 1.3E-02     | 1.4E-02     | 2.9E-03     | 1.9E-03     | 8.4E-04     | 6.3E-03     | 6.9E-03     |
| 3.6E-02     | 5.9E-02     | 4.5E-02     | 1.4E-01     | 9.8E-02     | 5.9E-02     | 6.4E-02     | 3.2E-02     | 6.1E-02     | 5.8E-02     |
| 4.2E-02     | 3.1E-02     | 2.4E-02     | 6.9E-02     | 9.3E-02     | 2.3E-02     | 3.4E-02     | 2.1E-02     | 3.0E-02     | 1.6E-02     |
| 7.2E-02     | 5.1E-02     | 5.0E-02     | 9.1E-02     | 1.6E-01     | 5.1E-02     | 2.6E-02     | 2.1E-02     | 8.0E-02     | 4.6E-02     |
| 3.3E+00     | 2.4E+01     | 2.3E+01     | 7.3E+00     | 0.0E+00     | 1.4E+01     | 4.7E+00     | 1.9E+01     | 1.6E+01     | 2.2E+01     |
| 0           | 0           | 0           | 0           | 0           | 0           | 0           | 0           | 0           | 0           |
| 1           | 1           | 0           | 1           | 0           | 0           | 1           | 1           | 0           | 0           |
| 0           | 0           | 0           | 0           | 0           | 0           | 0           | 0           | 0           | 0           |
| 0           | 0           | 0           | 0           | 0           | 0           | 0           | 33          | 0           | 0           |
| 0           | 0           | 0           | 0           | 0           | 0           | 0           | 56          | 0           | 0           |
| 0           | 0           | 0           | 0           | 0           | 89          | 0           | 100         | 0           | 0           |
| 0           | 0           | 0           | 0           | 0           | 0           | 0           | 0           | 0           | 0           |
| 0           | 14          | 0           | 0           | 0           | 0           | 0           | 5           | 0           | 0           |
| 0           | 29          | 2           | 0           | 0           | 31          | 14          | 47          | 0           | 15          |
| 25          | 16          | 36          | 8           | 0           | 7           | 0           | 29          | 44          | 25          |
| 0           | 24          | 83          | 31          | 0           | 0           | 0           | 0           | 54          | 85          |
| 0           | 0           | 0           | 0           | 0           | 0           | 0           | 0           | 0           | 100         |
| 0           | 0           | 0           | 0           | 0           | 0           | 0           | 0           | 0           | 0           |
| 0           | 0           | 0           | 0           | 0           | 0           | 38          | 0           | 0           | 0           |
| 0           | 0           | 0           | 0           | 0           | 0           | 40          | 0           | 0           | 0           |
| 0           | 0           | 0           | 0           | 0           | 0           | 50          | 0           | 0           | 0           |
| 0           | 0           | 0           | 0           | 0           | 0           | 0           | 0           | 0           | 0           |
| 0           | 0           | 0           | 0           | 0           | 0           | 0           | 0           | 0           | 0           |
| 0           | 0           | 0           | 0           | 0           | 0           | 0           | 0           | 0           | 0           |
| 0           | 0           | 0           | 0           | 0           | 0           | 0           | 0           | 0           | 0           |
| 0           | 0           | 0           | 0           | 0           | 0           | 0           | 0           | 0           | 0           |
| 0           | 0           | 0           | 0           | 0           | 0           | 0           | 0           | 0           | 0           |
| 0           | 0           | 0           | 0           | 0           | 0           | 0           | 0           | 0           | 0           |
| 0           | 0           | 0           | 0           | 0           | 0           | 0           | 0           | 0           | 0           |
| 0           | 0           | 0           | 0           | 0           | 0           | 0           | 0           | 0           | 0           |
| 0           | 0           | 0           | 0           | 0           | 0           | 0           | 0           | 0           | 0           |
| 0           | 0           | 0           | 0           | 0           | 0           | 0           | 0           | 0           | 0           |
| 0           | 0           | 0           | 0           | 0           | 0           | 0           | 0           | 0           | 0           |
| 0           | 0           | 0           | 0           | 0           | 0           | 0           | 0           | 0           | 0           |
| 0           | 0           | 0           | 0           | 0           | 0           | 0           | 0           | 0           | 0           |
| 0           | 0           | 0           | 0           | 0           | 0           | 0           | 0           | 0           | 0           |
| 0           | 2           | 0           | 0           | 0           | 0           | 0           | 0           | 0           | 0           |
| 0           | 0           | 0           | 0           | 0           | 0           | 0           | 0           | 0           | 0           |
| 2           | 2           | 0           | 0           | 0           | 0           | 3           | 2           | 0           | 0           |
| 0           | 0           | 0           | 0           | 0           | 0           | 0           | 0           | 0           | 0           |
| 0           | 0           | 0           | 0           | 0           | 0           | 0           | 0           | 0           | 0           |
| 0           | 1           | 0           | 0           | 0           | 0           | 0           | 1           | 0           | 0           |
| 0           | 0           | 0           | 3           | 0           | 0           | 0           | 0           | 0           | 0           |
| 0           | 0           | 0           | 0           | 0           | 0           | 0           | 0           | 0           | 0           |
| 0           | 0           | 0           | 0           | 0           | 2           | 0           | 0           | 0           | 0           |
| 0           | 0           | 0           | 0           | 0           | 1           | 0           | 0           | 0           | 0           |
| 2           | 0           | 0           | 2           | 0           | 0           | 0           | 0           | 0           | 0           |
| 0           | 0           | 0           | 0           | 0           | 0           | 0           | 0           | 0           | 0           |
| 9.1E-02     | 8.9E-02     | 9.0E-02     | 4.2E-01     | 3.6E-01     | 9.3E-02     | 2.6E-01     | 8.9E-02     | 2.3E-01     | 2.2E-02     |
| 3.7E-01     | 5.0E-01     | 3.9E-01     | 6.2E-01     | 5.8E-01     | 5.4E-01     | 5.2E-01     | 4.7E-01     | 6.2E-01     | 4.2E-01     |
| 10          | 17          | 17          | 15          | 9           | 13          | 13          | 16          | 14          | 14          |
| 3.5E-01     | 1.0E+00     | -1.2E+00    | 5.2E-01     | -1.5E-01    | 4.0E-01     | 1.0E+00     | -5.6E-01    | 7.8E-01     | 8.2E-01     |
| 5.8E+01     | 1.1E+02     | 1.5E+02     | 1.2E+02     | 3.5E+01     | 1.7E+02     | 4.7E+01     | 6.3E+01     | 3.6E+02     | 2.3E+02     |

| Common_High |
|-------------|-------------|-------------|-------------|-------------|-------------|-------------|-------------|-------------|-------------|
| At_F0664    | At_F0665    | At_F0667    | At_F0669    | At_F0676    | At_F0678    | At_F0681    | At_F0687    | At_F0695    | At_F0700    |
| -           | -           | -           | -           | -           | bm          | -           | -           | -           | bm          |
| 1.8E-03     | 3.4E-03     | 2.5E-03     | 3.5E-03     | 3.1E-03     | 3.6E-03     | 3.0E-03     | 6.4E-03     | 5.7E-03     | 1.5E-03     |
| 2.1E-03     | 2.3E-03     | 3.6E-03     | 3.2E-03     | 4.5E-03     | 1.5E-03     | 3.2E-03     | 4.4E-03     | 3.1E-03     | 1.2E-03     |
| 2.2E-03     | 2.8E-03     | 3.7E-03     | 9.6E-04     | 3.3E-03     | 6.4E-03     | 1.4E-02     | 6.2E-03     | 4.6E-03     | 8.9E-04     |
| 4.8E-02     | 6.7E-02     | 3.9E-02     | 4.4E-02     | 6.7E-02     | 6.6E-02     | 6.9E-02     | 8.4E-02     | 9.9E-02     | 2.6E-02     |
| 5.0E-02     | 3.1E-02     | 3.5E-02     | 3.2E-02     | 3.1E-02     | 3.0E-02     | 5.9E-02     | 5.3E-02     | 5.9E-02     | 2.6E-02     |
| 3.2E-02     | 6.9E-02     | 4.8E-02     | 3.9E-02     | 3.5E-02     | 8.7E-02     | 1.1E-01     | 6.8E-02     | 7.3E-02     | 2.3E-02     |
| 6.8E+00     | 1.5E+01     | 0.0E+00     | 1.7E+00     | 5.7E+00     | 2.9E+01     | 1.6E+00     | 0.0E+00     | 0.0E+00     | 3.3E+01     |
| 0           | 2           | 0           | 0           | 0           | 2           | 0           | 0           | 0           | 0           |
| 0           | 0           | 0           | 0           | 0           | 0           | 0           | 0           | 0           | 1           |
| 0           | 0           | 0           | 0           | 0           | 0           | 0           | 0           | 0           | 0           |
| 0           | 0           | 0           | 0           | 0           | 0           | 0           | 0           | 0           | 0           |
| 0           | 0           | 0           | 0           | 0           | 0           | 5           | 0           | 0           | 0           |
| 0           | 0           | 0           | 0           | 0           | 0           | 0           | 0           | 0           | 0           |
| 0           | 0           | 0           | 0           | 0           | 0           | 0           | 0           | 0           | 0           |
| 0           | 0           | 0           | 0           | 0           | 0           | 0           | 0           | 0           | 71          |
| 0           | 11          | 0           | 0           | 0           | 12          | 0           | 0           | 0           | 33          |
| 0           | 12          | 0           | 0           | 0           | 10          | 5           | 0           | 0           | 56          |
| 38          | 38          | 0           | 0           | 15          | 50          | 0           | 0           | 0           | 0           |
| 0           | 60          | 0           | 17          | 44          | 91          | 0           | 0           | 0           | 0           |
| 0           | 0           | 0           | 0           | 0           | 0           | 0           | 0           | 0           | 0           |
| 0           | 0           | 0           | 0           | 0           | 0           | 0           | 0           | 0           | 25          |
| 0           | 0           | 0           | 0           | 0           | 0           | 0           | 0           | 0           | 31          |
| 0           | 0           | 0           | 0           | 10          | 0           | 78          | 0           | 0           | 0           |
| 0           | 0           | 0           | 0           | 100         | 100         | 100         | 0           | 0           | 33          |
| 0           | 0           | 0           | 0           | 0           | 0           | 0           | 0           | 0           | 0           |
| 0           | 0           | 0           | 0           | 0           | 0           | 0           | 0           | 0           | 0           |
| 0           | 0           | 0           | 0           | 0           | 0           | 0           | 0           | 0           | 0           |
| 0           | 5           | 0           | 0           | 0           | 0           | 0           | 0           | 0           | 0           |
| 0           | 0           | 0           | 0           | 0           | 0           | 0           | 0           | 0           | 17          |
| 0           | 4           | 0           | 0           | 0           | 0           | 0           | 0           | 0           | 0           |
| 0           | 0           | 0           | 0           | 0           | 0           | 0           | 0           | 0           | 0           |
| 0           | 0           | 0           | 0           | 0           | 3           | 0           | 0           | 0           | 0           |
| 0           | 2           | 0           | 0           | 0           | 0           | 0           | 0           | 0           | 0           |
| 0           | 0           | 0           | 0           | 0           | 0           | 0           | 0           | 0           | 0           |
| 0           | 0           | 0           | 0           | 25          | 0           | 0           | 0           | 0           | 0           |
| 0           | 0           | 0           | 0           | 0           | 0           | 0           | 0           | 0           | 0           |
| 0           | 0           | 0           | 0           | 0           | 0           | 0           | 0           | 0           | 0           |
| 0           | 0           | 0           | 0           | 0           | 0           | 70          | 0           | 0           | 0           |
| 0           | 0           | 0           | 0           | 0           | 50          | 0           | 20          | 0           | 0           |
| 0           | 0           | 0           | 0           | 0           | 0           | 0           | 0           | 3           | 0           |
| 2           | 0           | 0           | 0           | 0           | 0           | 0           | 0           | 0           | 0           |
| 0           | 0           | 0           | 0           | 0           | 0           | 0           | 0           | 0           | 0           |
| 0           | 0           | 0           | 2           | 0           | 0           | 0           | 0           | 0           | 0           |
| 0           | 0           | 0           | 0           | 0           | 0           | 0           | 0           | 0           | 0           |
| 0           | 0           | 0           | 1           | 0           | 0           | 0           | 0           | 0           | 0           |
| 0           | 0           | 0           | 0           | 0           | 0           | 0           | 0           | 1           | 0           |
| 0           | 0           | 0           | 0           | 0           | 0           | 0           | 0           | 0           | 0           |
| 0           | 1           | 0           | 0           | 0           | 0           | 0           | 0           | 0           | 2           |
| 0           | 0           | 0           | 0           | 0           | 0           | 0           | 0           | 0           | 0           |
| 0           | 0           | 0           | 0           | 0           | 0           | 0           | 0           | 0           | 0           |
| 0           | 0           | 0           | 0           | 2           | 0           | 0           | 0           | 0           | 0           |
| 0           | 0           | 0           | 0           | 0           | 0           | 0           | 3           | 0           | 0           |
| 0           | 0           | 0           | 0           | 0           | 0           | 4           | 3           | 0           | 0           |
| 0           | 0           | 0           | 0           | 0           | 36          | 0           | 0           | 0           | 3           |
| 4.5E-01     | 9.6E-02     | 2.3E-01     | 4.6E-02     | 5.7E-02     | 8.8E-02     | 1.2E-01     | 9.7E-02     | 9.9E-01     | 1.7E+00     |
| 4.7E-01     | 2.6E-01     | 5.7E-01     | 3.1E-01     | 5.4E-01     | 4.4E-01     | 7.1E-01     | 6.7E-01     | 2.7E-01     | 5.1E-01     |
| 17          | 9           | 15          | 14          | 15          | 15          | 15          | 16          | 13          | 10          |
| -3.6E-01    | 0.0E+00     | -4.1E-01    | 4.1E-01     | -2.4E-01    | 5.9E-01     | 3.0E-01     | -1.9E+00    | 0.0E+00     | 6.5E-01     |
| 2.1E+02     | 8.1E+01     | 1.9E+01     | 6.0E+01     | 7.8E+01     | 1.1E+02     | 3.2E+01     | 1.1E+02     | 5.5E+01     | 6.7E+01     |

| Common_High |
|-------------|-------------|-------------|-------------|-------------|-------------|-------------|-------------|-------------|-------------|
| At_F0703    | At_F0705    | At_F0709    | At_F0710    | At_F0065    | At_F0202    | At_F0306    | At_F0344    | At_F0388    | At_F0397    |
| -           | bm          | -           | -           | -           | bm          | -           | -           | -           | -           |
| 1.6E-03     | 3.9E-03     | 4.4E-03     | 1.2E-02     | 3.5E-03     | 2.2E-03     | 2.4E-03     | 5.7E-03     | 1.6E-03     | 4.6E-03     |
| 1.3E-03     | 1.8E-03     | 3.4E-03     | 6.4E-03     | 6.0E-04     | 5.8E-04     | 1.9E-03     | 5.1E-03     | 3.4E-03     | 7.8E-04     |
| 6.7E-03     | 2.0E-03     | 2.4E-03     | 3.1E-03     | 5.8E-03     | 7.3E-03     | 1.6E-03     | 4.7E-03     | 6.3E-03     | 6.2E-03     |
| 3.1E-02     | 5.1E-02     | 5.8E-02     | 9.2E-02     | 6.2E-02     | 5.3E-02     | 3.9E-02     | 6.1E-02     | 4.3E-02     | 1.0E-01     |
| 2.7E-02     | 1.7E-02     | 3.5E-02     | 5.0E-02     | 2.6E-02     | 2.5E-02     | 3.3E-02     | 4.7E-02     | 6.0E-02     | 2.5E-02     |
| 5.9E-02     | 3.6E-02     | 5.4E-02     | 5.4E-02     | 6.6E-02     | 5.9E-02     | 2.6E-02     | 1.1E-01     | 5.5E-02     | 1.1E-01     |
| 7.8E-01     | 2.1E+01     | 1.2E+01     | 5.1E+00     | 1.6E+01     | 2.6E+01     | 0.0E+00     | 6.6E+00     | 1.5E+01     | 5.7E+00     |
| 0           | 0           | 0           | 0           | 0           | 0           | 3           | 0           | 0           | 0           |
| 1           | 0           | 0           | 0           | 0           | 0           | 1           | 0           | 1           | 0           |
| 0           | 0           | 0           | 0           | 0           | 0           | 0           | 0           | 0           | 0           |
| 0           | 0           | 0           | 0           | 19          | 0           | 0           | 0           | 0           | 0           |
| 0           | 0           | 0           | 0           | 20          | 0           | 0           | 0           | 0           | 0           |
| 0           | 0           | 0           | 0           | 100         | 0           | 0           | 0           | 91          | 0           |
| 0           | 0           | 0           | 0           | 0           | 0           | 0           | 0           | 0           | 0           |
| 0           | 0           | 0           | 0           | 20          | 19          | 0           | 0           | 0           | 0           |
| 0           | 21          | 0           | 0           | 29          | 33          | 0           | 0           | 32          | 14          |
| 0           | 21          | 10          | 0           | 7           | 47          | 0           | 7           | 44          | 9           |
| 8           | 76          | 50          | 80          | 0           | 13          | 0           | 44          | 0           | 50          |
| 0           | 0           | 0           | 0           | 0           | 0           | 0           | 20          | 0           | 0           |
| 0           | 0           | 0           | 0           | 0           | 0           | 0           | 0           | 0           | 0           |
| 0           | 0           | 0           | 0           | 0           | 0           | 0           | 0           | 0           | 0           |
| 0           | 23          | 0           | 0           | 0           | 0           | 40          | 25          | 0           | 0           |
| 0           | 100         | 0           | 78          | 0           | 0           | 78          | 60          | 0           | 0           |
| 0           | 0           | 0           | 0           | 0           | 0           | 0           | 0           | 0           | 0           |
| 0           | 0           | 0           | 0           | 0           | 0           | 0           | 0           | 0           | 0           |
| 0           | 0           | 0           | 0           | 0           | 0           | 0           | 0           | 0           | 0           |
| 0           | 0           | 0           | 0           | 0           | 0           | 0           | 0           | 0           | 0           |
| 0           | 0           | 0           | 0           | 0           | 0           | 0           | 0           | 0           | 0           |
| 0           | 0           | 0           | 0           | 0           | 0           | 0           | 0           | 0           | 0           |
| 0           | 0           | 0           | 0           | 0           | 0           | 5           | 0           | 0           | 0           |
| 0           | 0           | 0           | 0           | 0           | 0           | 0           | 0           | 0           | 0           |
| 0           | 20          | 0           | 0           | 0           | 0           | 0           | 0           | 0           | 10          |
| 0           | 11          | 0           | 0           | 0           | 0           | 0           | 0           | 0           | 0           |
| 0           | 6           | 0           | 0           | 0           | 0           | 0           | 0           | 0           | 0           |
| 0           | 0           | 0           | 0           | 0           | 0           | 0           | 0           | 0           | 0           |
| 0           | 0           | 0           | 0           | 0           | 0           | 0           | 0           | 0           | 0           |
| 0           | 0           | 0           | 0           | 0           | 0           | 0           | 33          | 0           | 0           |
| 0           | 0           | 0           | 0           | 0           | 0           | 0           | 0           | 0           | 0           |
| 0           | 0           | 0           | 0           | 0           | 0           | 0           | 0           | 0           | 0           |
| 0           | 0           | 0           | 0           | 0           | 0           | 0           | 0           | 2           | 0           |
| 0           | 0           | 0           | 0           | 0           | 0           | 0           | 0           | 0           | 0           |
| 0           | 0           | 0           | 0           | 0           | 0           | 0           | 0           | 0           | 0           |
| 2           | 0           | 0           | 0           | 0           | 0           | 0           | 0           | 0           | 0           |
| 0           | 0           | 0           | 0           | 0           | 0           | 1           | 0           | 2           | 0           |
| 0           | 0           | 0           | 0           | 0           | 0           | 0           | 0           | 0           | 0           |
| 0           | 0           | 0           | 0           | 0           | 0           | 0           | 0           | 0           | 0           |
| 0           | 2           | 0           | 0           | 0           | 0           | 0           | 0           | 0           | 0           |
| 0           | 0           | 0           | 0           | 0           | 0           | 0           | 8           | 0           | 0           |
| 0           | 0           | 0           | 0           | 0           | 0           | 0           | 0           | 0           | 0           |
| 0           | 0           | 0           | 0           | 0           | 0           | 0           | 0           | 0           | 0           |
| 0           | 0           | 0           | 0           | 0           | 0           | 0           | 7           | 0           | 4           |
| 0           | 0           | 5           | 0           | 0           | 0           | 0           | 36          | 0           | 0           |
| 9.9E-02     | 4.6E-02     | 7.8E-02     | 1.7E-01     | 8.8E-02     | 1.4E-01     | 9.9E-02     | 9.1E-02     | 2.7E+00     | 1.1E-01     |
| 5.8E-01     | 6.2E-01     | 7.1E-01     | 5.1E-01     | 4.5E-01     | 3.2E-01     | 5.0E-01     | 2.7E-01     | 4.2E-01     | 4.2E-01     |
| 10          | 14          | 17          | 17          | 12          | 16          | 11          | 12          | 12          | 10          |
| -5.0E-01    | 4.1E-01     | -3.6E-01    | -6.7E-01    | -3.6E+00    | 1.0E+00     | 1.1E-01     | 1.1E-01     | -5.2E+00    | 1.0E+00     |
| 3.1E+01     | 1.1E+02     | 3.2E+01     | 1.6E+02     | 0.0E+00     | 0.0E+00     | 0.0E+00     | 0.0E+00     | 0.0E+00     | 0.0E+00     |

| Common_High |
|-------------|-------------|-------------|-------------|-------------|-------------|-------------|-------------|-------------|-------------|
| At_F0426    | At_F0443    | At_F0460    | At_F0506    | At_F0581    | At_F0591    | At_F0602    | At_F0604    | At_F0657    | Atpeg0151   |
| bm          | -           | bm          | -           | -           | -           | bm          | -           | -           | NA          |
| 8.6E-04     | 9.7E-03     | 3.7E-03     | 5.5E-03     | 3.7E-03     | 1.4E-02     | 3.5E-03     | 1.8E-03     | 2.2E-03     | 2.9E-03     |
| 1.2E-03     | 6.6E-03     | 2.8E-03     | 1.3E-03     | 3.6E-03     | 3.6E-03     | 4.2E-03     | 3.0E-03     | 1.8E-03     | 3.1E-03     |
| 2.3E-03     | 1.3E-02     | 2.1E-03     | 3.1E-03     | 9.9E-03     | 3.2E-03     | 2.5E-03     | 5.3E-03     | 3.6E-03     | 9.6E-03     |
| 3.3E-02     | 2.0E-01     | 5.6E-02     | 5.3E-02     | 2.9E-02     | 1.5E-01     | 4.9E-02     | 2.6E-02     | 4.7E-02     | 4.5E-02     |
| 3.1E-02     | 6.4E-02     | 2.7E-02     | 3.3E-02     | 2.6E-02     | 5.9E-02     | 4.8E-02     | 2.4E-02     | 4.7E-02     | 3.5E-02     |
| 3.6E-02     | 1.1E-01     | 2.9E-02     | 4.5E-02     | 6.9E-02     | 8.4E-02     | 8.0E-02     | 5.5E-02     | 5.5E-02     | 7.1E-02     |
| 2.4E+01     | 1.5E+01     | 2.1E+01     | 9.0E+00     | 1.1E+01     | 8.9E+00     | 2.6E+01     | 1.5E+01     | 1.2E+00     | 0.0E+00     |
| 0           | 0           | 1           | 0           | 0           | 0           | 0           | 0           | 0           | 0           |
| 0           | 0           | 0           | 1           | 0           | 1           | 0           | 0           | 1           | 0           |
| 100         | 0           | 0           | 0           | 40          | 0           | 0           | 0           | 0           | 0           |
| 0           | 40          | 0           | 0           | 11          | 0           | 0           | 0           | 0           | 0           |
| 0           | 14          | 0           | 0           | 0           | 4           | 0           | 0           | 0           | 0           |
| 0           | 50          | 0           | 0           | 0           | 36          | 0           | 0           | 0           | 0           |
| 0           | 88          | 0           | 0           | 0           | 71          | 0           | 0           | 0           | 0           |
| 0           | 0           | 0           | 0           | 0           | 0           | 0           | 0           | 0           | 0           |
| 50          | 0           | 33          | 0           | 9           | 0           | 31          | 0           | 0           | 0           |
| 32          | 17          | 20          | 0           | 21          | 0           | 48          | 24          | 0           | 0           |
| 0           | 36          | 21          | 31          | 24          | 26          | 27          | 42          | 8           | 0           |
| 30          | 91          | 42          | 44          | 13          | 75          | 17          | 50          | 0           | 0           |
| 50          | 0           | 0           | 0           | 0           | 0           | 0           | 0           | 0           | 0           |
| 0           | 0           | 0           | 0           | 0           | 0           | 0           | 0           | 0           | 0           |
| 0           | 0           | 13          | 0           | 0           | 0           | 50          | 0           | 0           | 0           |
| 0           | 0           | 0           | 0           | 0           | 0           | 0           | 0           | 0           | 0           |
| 0           | 0           | 0           | 0           | 0           | 0           | 0           | 0           | 0           | 0           |
| 0           | 0           | 0           | 0           | 0           | 0           | 0           | 0           | 0           | 0           |
| 0           | 0           | 0           | 0           | 0           | 0           | 0           | 0           | 0           | 0           |
| 0           | 0           | 0           | 0           | 0           | 0           | 0           | 0           | 0           | 0           |
| 0           | 0           | 0           | 0           | 0           | 0           | 0           | 0           | 0           | 0           |
| 0           | 0           | 1           | 0           | 0           | 0           | 0           | 0           | 0           | 0           |
| 0           | 0           | 0           | 0           | 0           | 0           | 0           | 0           | 0           | 0           |
| 0           | 0           | 0           | 0           | 0           | 0           | 0           | 0           | 0           | 0           |
| 0           | 0           | 0           | 0           | 0           | 0           | 0           | 0           | 0           | 0           |
| 0           | 0           | 8           | 0           | 0           | 0           | 0           | 0           | 0           | 0           |
| 0           | 0           | 0           | 0           | 0           | 0           | 0           | 0           | 0           | 0           |
| 0           | 0           | 0           | 0           | 0           | 0           | 0           | 0           | 0           | 0           |
| 0           | 0           | 0           | 0           | 0           | 4           | 0           | 0           | 0           | 5           |
| 2           | 0           | 0           | 0           | 0           | 0           | 0           | 0           | 0           | 0           |
| 0           | 0           | 0           | 0           | 0           | 0           | 0           | 0           | 0           | 0           |
| 0           | 0           | 0           | 0           | 0           | 0           | 0           | 0           | 0           | 0           |
| 0           | 0           | 0           | 0           | 0           | 0           | 0           | 0           | 0           | 0           |
| 0           | 0           | 0           | 0           | 0           | 0           | 0           | 0           | 0           | 0           |
| 0           | 0           | 0           | 0           | 1           | 2           | 0           | 0           | 0           | 0           |
| 0           | 0           | 0           | 0           | 0           | 0           | 0           | 0           | 1           | 0           |
| 0           | 0           | 0           | 0           | 0           | 0           | 0           | 0           | 0           | 0           |
| 0           | 0           | 0           | 3           | 0           | 0           | 0           | 0           | 0           | 0           |
| 0           | 0           | 0           | 0           | 0           | 0           | 0           | 0           | 0           | 0           |
| 0           | 0           | 0           | 0           | 0           | 0           | 0           | 0           | 0           | 2           |
| 0           | 0           | 0           | 0           | 0           | 0           | 0           | 0           | 0           | 0           |
| 0           | 0           | 0           | 0           | 0           | 0           | 0           | 0           | 0           | 0           |
| 0           | 0           | 0           | 0           | 0           | 0           | 0           | 0           | 3           | 4           |
| 8.4E-02     | 9.7E-02     | 4.3E-02     | 9.2E-02     | 9.8E-01     | 7.8E-01     | 8.2E-01     | 2.6E-02     | 1.2E+00     | 1.2E-01     |
| 1.9E-01     | 7.1E-01     | 4.3E-01     | 3.1E-01     | 2.7E-01     | 6.9E-01     | 5.0E-01     | 3.5E-01     | 2.5E-01     | 7.3E-01     |
| 12          | 17          | 16          | 12          | 11          | 17          | 17          | 13          | 13          | 12          |
| -7.1E-01    | -3.9E-01    | -5.9E-02    | -2.7E-01    | -1.3E+00    | -1.3E+00    | 1.0E+00     | 2.6E-01     | -4.4E-01    | -2.4E-01    |
| 0.0E+00     |

| Common_Low |
|------------|------------|------------|------------|------------|------------|------------|------------|------------|------------|------------|
| At_F0236   | At_F0402   | At_F0468   | At_F0490   | At_F0585   | At_F0276   | At_F0328   | At_F0417   | At_F0559   | At_F0656   | At_F0102   |
| -          | -          | -          | -          | -          | -          | -          | -          | -          | -          | -          |
| 1.5E-03    | 1.8E-03    | 2.2E-03    | 1.2E-02    | 5.2E-03    | 9.7E-03    | 3.2E-03    | 3.0E-03    | 6.4E-03    | 1.4E-02    | 2.3E-03    |
| 1.4E-03    | 3.1E-03    | 1.3E-03    | 1.5E-02    | 4.9E-03    | 8.6E-03    | 2.4E-03    | 2.1E-03    | 1.4E-03    | 6.3E-03    | 8.2E-03    |
| 4.7E-03    | 3.8E-03    | 1.5E-03    | 6.2E-03    | 1.6E-03    | 4.9E-03    | 2.8E-03    | 1.5E-03    | 1.8E-03    | 5.1E-03    | 9.1E-03    |
| 3.6E-02    | 3.7E-02    | 4.1E-02    | 1.2E-01    | 6.6E-02    | 6.2E-02    | 9.1E-02    | 4.5E-02    | 1.4E-01    | 1.4E-01    | 4.7E-02    |
| 3.6E-02    | 4.1E-02    | 3.9E-02    | 1.3E-01    | 4.0E-02    | 8.9E-02    | 7.1E-02    | 3.7E-02    | 5.3E-02    | 5.2E-02    | 4.4E-02    |
| 1.1E-01    | 4.8E-02    | 3.4E-02    | 6.5E-02    | 2.9E-02    | 7.1E-02    | 8.0E-02    | 3.7E-02    | 5.2E-02    | 5.8E-02    | 6.3E-02    |
| 3.8E+00    | 0.0E+00    | 0.0E+00    | 0.0E+00    | 1.7E+01    | 0.0E+00    | 0.0E+00    | 0.0E+00    | 0.0E+00    | 0.0E+00    | 1.5E+01    |
| 0          | 0          | 0          | 0          | 0          | 0          | 0          | 0          | 0          | 0          | 0          |
| 0          | 0          | 0          | 0          | 0          | 0          | 0          | 0          | 0          | 0          | 0          |
| 0          | 14         | 0          | 0          | 0          | 0          | 0          | 0          | 67         | 0          | 0          |
| 0          | 0          | 0          | 0          | 0          | 0          | 0          | 0          | 8          | 0          | 0          |
| 0          | 0          | 0          | 0          | 0          | 0          | 0          | 0          | 0          | 56         | 0          |
| 0          | 0          | 0          | 0          | 0          | 0          | 0          | 0          | 0          | 100        | 44         |
| 0          | 0          | 0          | 0          | 0          | 0          | 0          | 0          | 0          | 0          | 20         |
| 0          | 0          | 0          | 0          | 0          | 0          | 0          | 0          | 0          | 0          | 0          |
| 0          | 0          | 0          | 0          | 0          | 0          | 0          | 0          | 0          | 0          | 0          |
| 0          | 0          | 0          | 0          | 8          | 0          | 0          | 0          | 0          | 0          | 0          |
| 0          | 0          | 0          | 0          | 38         | 0          | 0          | 0          | 0          | 0          | 40         |
| 50         | 0          | 0          | 0          | 92         | 0          | 0          | 0          | 0          | 0          | 20         |
| 0          | 0          | 0          | 0          | 0          | 0          | 0          | 0          | 0          | 0          | 0          |
| 0          | 0          | 0          | 0          | 0          | 0          | 0          | 0          | 0          | 25         | 0          |
| 0          | 0          | 0          | 0          | 0          | 0          | 0          | 0          | 0          | 50         | 0          |
| 50         | 0          | 57         | 0          | 0          | 0          | 0          | 0          | 0          | 0          | 0          |
| 100        | 0          | 33         | 0          | 0          | 0          | 0          | 0          | 0          | 0          | 0          |
| 0          | 0          | 0          | 0          | 0          | 0          | 0          | 0          | 100        | 0          | 0          |
| 0          | 0          | 0          | 0          | 0          | 0          | 0          | 0          | 7          | 0          | 0          |
| 0          | 0          | 0          | 0          | 0          | 0          | 0          | 0          | 0          | 0          | 0          |
| 0          | 0          | 0          | 0          | 0          | 0          | 0          | 0          | 0          | 0          | 0          |
| 0          | 0          | 0          | 0          | 0          | 0          | 0          | 0          | 0          | 0          | 0          |
| 0          | 0          | 0          | 0          | 0          | 0          | 0          | 0          | 0          | 0          | 0          |
| 0          | 0          | 0          | 0          | 0          | 0          | 0          | 0          | 0          | 0          | 0          |
| 0          | 0          | 0          | 0          | 0          | 0          | 0          | 0          | 0          | 0          | 0          |
| 0          | 0          | 0          | 0          | 0          | 0          | 0          | 0          | 0          | 0          | 0          |
| 0          | 0          | 0          | 0          | 0          | 0          | 0          | 0          | 0          | 0          | 0          |
| 0          | 0          | 0          | 0          | 0          | 0          | 0          | 0          | 0          | 0          | 0          |
| 0          | 0          | 0          | 0          | 0          | 0          | 0          | 0          | 0          | 0          | 0          |
| 0          | 0          | 0          | 0          | 0          | 0          | 0          | 0          | 0          | 0          | 0          |
| 0          | 0          | 0          | 0          | 0          | 0          | 0          | 0          | 0          | 0          | 0          |
| 0          | 0          | 0          | 0          | 0          | 0          | 0          | 0          | 0          | 0          | 0          |
| 0          | 0          | 0          | 0          | 0          | 0          | 0          | 0          | 0          | 0          | 0          |
| 0          | 0          | 0          | 0          | 0          | 0          | 0          | 0          | 0          | 0          | 0          |
| 0          | 0          | 0          | 0          | 0          | 0          | 0          | 9          | 0          | 50         | 0          |
| 40         | 0          | 0          | 0          | 0          | 0          | 0          | 0          | 0          | 0          | 0          |
| 50         | 0          | 0          | 0          | 0          | 0          | 0          | 0          | 0          | 0          | 0          |
| 0          | 0          | 0          | 0          | 0          | 0          | 0          | 0          | 24         | 0          | 0          |
| 0          | 0          | 0          | 0          | 0          | 0          | 0          | 0          | 0          | 0          | 0          |
| 0          | 0          | 0          | 0          | 2          | 0          | 0          | 0          | 0          | 3          | 0          |
| 0          | 0          | 0          | 0          | 0          | 0          | 0          | 0          | 0          | 2          | 0          |
| 0          | 0          | 0          | 0          | 0          | 0          | 0          | 0          | 0          | 0          | 0          |
| 0          | 0          | 0          | 0          | 0          | 0          | 0          | 0          | 0          | 0          | 0          |
| 0          | 0          | 0          | 0          | 0          | 0          | 0          | 0          | 0          | 0          | 0          |
| 0          | 0          | 0          | 0          | 0          | 0          | 0          | 0          | 0          | 0          | 0          |
| 0          | 0          | 0          | 0          | 0          | 0          | 0          | 0          | 0          | 0          | 0          |
| 0          | 0          | 0          | 0          | 0          | 0          | 0          | 0          | 0          | 0          | 0          |
| 0          | 0          | 0          | 0          | 0          | 0          | 0          | 0          | 0          | 0          | 0          |
| 0          | 0          | 0          | 0          | 0          | 0          | 0          | 0          | 0          | 33         | 0          |
| 0          | 0          | 0          | 0          | 0          | 0          | 0          | 1          | 0          | 6          | 0          |
| 25         | 0          | 0          | 0          | 0          | 0          | 0          | 0          | 0          | 0          | 0          |
| 65         | 0          | 0          | 0          | 0          | 0          | 0          | 0          | 0          | 0          | 0          |
| 2.2E-01    | 1.1E-01    | 8.2E-02    | 1.2E+00    | 2.2E-01    | 2.5E+00    | 0.0E+00    | 9.1E-02    | 1.0E+00    | 6.5E-02    | 6.0E-02    |
| 1.2E-01    | 4.0E-01    | 5.9E-01    | 2.7E-01    | 5.6E-01    | 1.6E-01    | 2.0E-01    | 2.4E-01    | 8.6E-01    | 4.0E-01    | 5.3E-01    |
| 12         | 13         | 15         | 12         | 15         | 9          | 12         | 8          | 14         | 14         | 11         |
| 4.4E-01    | 3.6E-01    | -2.8E+00   | 5.1E-01    | 7.4E-01    | -4.6E-01   | -9.9E-01   | 1.1E-01    | 7.9E-01    | -1.6E-01   | 2.0E-01    |
| 1.3E+01    | 8.7E+01    | 2.2E+02    | 1.5E+01    | 1.2E+02    | 5.8E+01    | 1.4E+01    | 6.0E+00    | 4.7E+01    | 3.8E+02    | 5.6E+01    |





| Common_Low |
|------------|------------|------------|------------|------------|------------|------------|------------|------------|------------|------------|
| At_F0297   | At_F0336   | At_F0535   | At_F0552   | At_F0612   | At_F0619   | At_F0640   | At_F0674   | At_F0679   | At_F0699   | At_F0578   |
| -          | -          | -          | -          | -          | -          | -          | -          | -          | -          | -          |
| 2.9E-03    | 2.4E-03    | 1.3E-03    | 3.0E-03    | 2.8E-03    | 8.7E-04    | 6.9E-03    | 1.6E-02    | 4.0E-03    | 3.8E-03    | 9.3E-03    |
| 4.2E-04    | 1.2E-03    | 1.2E-03    | 2.8E-03    | 1.7E-03    | 1.1E-03    | 1.2E-02    | 6.4E-03    | 2.3E-03    | 8.7E-04    | 3.3E-03    |
| 5.2E-03    | 1.1E-03    | 2.2E-03    | 5.6E-03    | 1.8E-03    | 2.1E-03    | 9.1E-03    | 1.6E-02    | 4.6E-03    | 3.9E-04    | 8.1E-03    |
| 5.2E-02    | 4.2E-02    | 3.5E-02    | 3.1E-02    | 5.0E-02    | 2.7E-02    | 9.5E-02    | 1.6E-01    | 7.7E-02    | 6.7E-02    | 9.3E-02    |
| 8.4E-03    | 3.3E-02    | 3.2E-02    | 3.1E-02    | 4.1E-02    | 2.4E-02    | 9.8E-02    | 1.0E-01    | 4.8E-02    | 3.2E-02    | 3.7E-02    |
| 1.0E-01    | 3.1E-02    | 4.7E-02    | 4.4E-02    | 4.6E-02    | 4.8E-02    | 1.2E-01    | 1.2E-01    | 9.3E-02    | 5.4E-02    | 8.1E-02    |
| 0.0E+00    | 0.0E+00    | 1.3E+01    | 2.4E+00    | 0.0E+00    | 1.2E+00    | 0.0E+00    | 0.0E+00    | 1.0E+01    | 0.0E+00    | 0.0E+00    |
| 0          | 0          | 0          | 0          | 0          | 0          | 0          | 0          | 0          | 0          | 0          |
| 0          | 0          | 1          | 0          | 1          | 0          | 0          | 0          | 0          | 0          | 0          |
| 0          | 0          | 0          | 0          | 0          | 0          | 0          | 0          | 9          | 0          | 0          |
| 0          | 0          | 40         | 0          | 0          | 0          | 0          | 0          | 28         | 0          | 27         |
| 0          | 0          | 0          | 45         | 0          | 0          | 0          | 0          | 3          | 0          | 0          |
| 0          | 0          | 0          | 40         | 0          | 0          | 0          | 0          | 5          | 0          | 0          |
| 0          | 0          | 0          | 0          | 0          | 0          | 0          | 0          | 0          | 0          | 0          |
| 0          | 0          | 0          | 0          | 0          | 0          | 0          | 0          | 18         | 0          | 0          |
| 0          | 0          | 0          | 9          | 0          | 6          | 6          | 0          | 13         | 0          | 0          |
| 0          | 0          | 0          | 0          | 0          | 0          | 0          | 0          | 16         | 0          | 0          |
| 0          | 0          | 39         | 0          | 0          | 0          | 0          | 0          | 7          | 0          | 0          |
| 0          | 0          | 71         | 0          | 0          | 0          | 0          | 0          | 0          | 0          | 0          |
| 0          | 0          | 0          | 0          | 0          | 0          | 0          | 0          | 0          | 0          | 0          |
| 0          | 0          | 0          | 0          | 0          | 0          | 0          | 0          | 0          | 0          | 0          |
| 0          | 0          | 0          | 0          | 0          | 0          | 60         | 0          | 14         | 0          | 0          |
| 0          | 0          | 0          | 0          | 0          | 0          | 0          | 0          | 0          | 0          | 25         |
| 0          | 0          | 0          | 0          | 0          | 0          | 0          | 0          | 0          | 0          | 67         |
| 0          | 0          | 0          | 0          | 0          | 0          | 0          | 0          | 0          | 0          | 0          |
| 0          | 0          | 0          | 0          | 0          | 0          | 0          | 0          | 0          | 0          | 0          |
| 0          | 0          | 0          | 0          | 0          | 0          | 0          | 0          | 0          | 0          | 0          |
| 0          | 0          | 0          | 0          | 0          | 0          | 0          | 0          | 0          | 0          | 0          |
| 0          | 0          | 0          | 0          | 0          | 0          | 0          | 0          | 0          | 0          | 0          |
| 0          | 0          | 0          | 0          | 0          | 0          | 0          | 0          | 0          | 0          | 0          |
| 0          | 0          | 0          | 0          | 0          | 0          | 0          | 0          | 0          | 0          | 0          |
| 0          | 0          | 0          | 0          | 0          | 0          | 0          | 0          | 0          | 0          | 0          |
| 0          | 0          | 0          | 0          | 0          | 0          | 0          | 0          | 0          | 0          | 0          |
| 0          | 0          | 0          | 0          | 0          | 0          | 0          | 0          | 0          | 0          | 0          |
| 0          | 0          | 0          | 0          | 0          | 0          | 0          | 0          | 0          | 0          | 0          |
| 0          | 0          | 0          | 0          | 0          | 0          | 0          | 0          | 0          | 0          | 0          |
| 0          | 0          | 0          | 0          | 0          | 0          | 25         | 0          | 0          | 0          | 0          |
| 0          | 0          | 0          | 0          | 0          | 0          | 0          | 0          | 0          | 0          | 0          |
| 0          | 0          | 0          | 0          | 0          | 0          | 0          | 100        | 0          | 0          | 0          |
| 0          | 0          | 0          | 0          | 3          | 0          | 0          | 0          | 0          | 0          | 0          |
| 0          | 0          | 2          | 0          | 0          | 0          | 0          | 0          | 0          | 0          | 0          |
| 0          | 0          | 0          | 0          | 0          | 0          | 0          | 0          | 0          | 0          | 0          |
| 0          | 0          | 0          | 0          | 0          | 2          | 0          | 0          | 0          | 0          | 0          |
| 0          | 0          | 0          | 0          | 0          | 0          | 0          | 3          | 0          | 0          | 0          |
| 0          | 0          | 0          | 0          | 3          | 0          | 0          | 0          | 0          | 0          | 0          |
| 0          | 0          | 0          | 0          | 0          | 0          | 0          | 0          | 0          | 0          | 0          |
| 0          | 0          | 0          | 0          | 0          | 0          | 0          | 0          | 0          | 0          | 0          |
| 0          | 0          | 1          | 0          | 0          | 0          | 0          | 0          | 0          | 0          | 0          |
| 0          | 0          | 3          | 0          | 0          | 0          | 0          | 0          | 0          | 0          | 0          |
| 0          | 0          | 0          | 0          | 0          | 0          | 0          | 0          | 0          | 0          | 0          |
| 0          | 0          | 0          | 0          | 0          | 0          | 0          | 0          | 0          | 0          | 0          |
| 0          | 0          | 0          | 0          | 0          | 0          | 0          | 0          | 2          | 0          | 0          |
| 0          | 0          | 0          | 0          | 0          | 0          | 0          | 0          | 0          | 0          | 0          |
| 0          | 0          | 0          | 0          | 0          | 0          | 0          | 0          | 13         | 0          | 0          |
| 1.0E+00    | 8.0E-02    | 8.0E-02    | 9.5E-01    | 1.3E-01    | 3.6E-01    | 3.0E-01    | 2.0E+00    | 8.3E-02    | 9.4E-02    | 1.1E-01    |
| 4.8E-01    | 3.1E-01    | 3.5E-01    | 5.4E-01    | 5.4E-01    | 5.2E-01    | 5.9E-01    | 4.2E-01    | 7.9E-01    | 4.4E-01    | 3.5E-01    |
| 15         | 12         | 11         | 7          | 15         | 16         | 5          | 14         | 9          | 11         | 8          |
| 1.0E+00    | -5.2E-01   | 3.4E-01    | 2.5E-02    | -9.1E-01   | -2.9E-01   | 0.0E+00    | 1.3E-01    | -6.6E+00   | 7.0E-01    | 2.0E-01    |
| 3.1E+01    | 1.8E+01    | 6.6E+00    | 1.5E+01    | 1.6E+01    | 1.5E+01    | 2.3E+01    | 1.0E+02    | 3.5E+01    | 6.9E+00    | 0.0E+00    |

| Common_Low |
|------------|------------|------------|------------|------------|------------|------------|------------|------------|------------|------------|
| At_F0254   | At_F0555   | At_F0520   | At_F0414   | At_F0396   | At_F0515   | At_F0308   | At_F0560   | At_F0161   | At_F0255   | Atpeg0063  |
| bm         | -          | -          | -          | -          | -          | -          | -          | -          | -          | NA         |
| 3.3E-03    | 2.0E-03    | 8.6E-03    | 1.4E-03    | 8.1E-03    | 9.8E-03    | 8.8E-03    | 1.2E-02    | 1.9E-02    | 1.2E-02    | 1.6E-02    |
| 1.4E-03    | 2.3E-04    | 5.1E-03    | 1.3E-03    | 5.5E-03    | 1.2E-02    | 7.1E-03    | 5.7E-03    | 9.3E-03    | 1.1E-02    | 3.8E-03    |
| 1.1E-03    | 6.8E-04    | 2.7E-03    | 2.6E-03    | 6.2E-03    | 1.3E-02    | 7.5E-03    | 4.9E-03    | 9.7E-03    | 6.9E-03    | 9.0E-03    |
| 2.6E-02    | 3.1E-02    | 5.8E-02    | 3.6E-02    | 4.7E-02    | 1.1E-01    | 1.1E-01    | 1.5E-01    | 1.6E-01    | 4.2E-02    | 1.0E-01    |
| 3.9E-02    | 1.3E-02    | 3.1E-02    | 2.4E-02    | 3.5E-02    | 1.0E-01    | 9.5E-02    | 6.0E-02    | 8.9E-02    | 4.8E-02    | 6.0E-02    |
| 3.9E-02    | 2.2E-02    | 6.5E-02    | 4.1E-02    | 3.1E-02    | 1.9E-01    | 9.1E-02    | 1.0E-01    | 8.7E-02    | 4.9E-02    | 1.0E-01    |
| 2.4E+01    | 0.0E+00    | 0.0E+00    | 0.0E+00    | 8.6E+00    | 0.0E+00    | 0.0E+00    | 4.1E+00    | 1.3E+01    | 6.9E+00    | 8.8E+00    |
| 2          | 0          | 0          | 0          | 0          | 0          | 0          | 0          | 0          | 0          | 10         |
| 1          | 0          | 0          | 0          | 0          | 0          | 0          | 1          | 0          | 0          | 0          |
| 0          | 0          | 0          | 0          | 0          | 0          | 0          | 0          | 0          | 0          | 0          |
| 0          | 0          | 0          | 0          | 0          | 0          | 0          | 67         | 0          | 33         | 0          |
| 0          | 0          | 0          | 0          | 0          | 0          | 0          | 0          | 0          | 7          | 0          |
| 0          | 0          | 0          | 0          | 0          | 0          | 0          | 0          | 0          | 0          | 0          |
| 0          | 0          | 0          | 0          | 0          | 0          | 0          | 0          | 17         | 0          | 0          |
| 0          | 0          | 0          | 0          | 0          | 0          | 0          | 0          | 0          | 25         | 0          |
| 10         | 0          | 0          | 0          | 0          | 0          | 0          | 0          | 13         | 22         | 0          |
| 22         | 0          | 0          | 0          | 0          | 0          | 0          | 11         | 11         | 0          | 8          |
| 36         | 0          | 0          | 0          | 0          | 0          | 0          | 6          | 31         | 0          | 9          |
| 100        | 0          | 0          | 0          | 67         | 0          | 0          | 0          | 60         | 0          | 83         |
| 0          | 0          | 0          | 0          | 0          | 0          | 0          | 0          | 67         | 0          | 0          |
| 17         | 0          | 0          | 0          | 14         | 0          | 0          | 0          | 0          | 0          | 0          |
| 0          | 0          | 0          | 0          | 42         | 0          | 0          | 0          | 0          | 0          | 0          |
| 0          | 0          | 0          | 0          | 33         | 38         | 0          | 0          | 0          | 0          | 0          |
| 0          | 0          | 0          | 0          | 100        | 100        | 0          | 0          | 0          | 0          | 100        |
| 0          | 0          | 0          | 0          | 0          | 0          | 0          | 0          | 0          | 0          | 0          |
| 0          | 0          | 0          | 0          | 0          | 0          | 0          | 100        | 0          | 0          | 0          |
| 0          | 0          | 0          | 0          | 0          | 0          | 0          | 0          | 0          | 0          | 0          |
| 0          | 0          | 0          | 0          | 0          | 0          | 0          | 0          | 0          | 0          | 0          |
| 0          | 0          | 0          | 0          | 0          | 0          | 0          | 0          | 0          | 0          | 0          |
| 0          | 0          | 0          | 0          | 0          | 0          | 0          | 0          | 0          | 0          | 0          |
| 0          | 0          | 0          | 0          | 0          | 0          | 0          | 0          | 0          | 0          | 5          |
| 10         | 0          | 0          | 0          | 0          | 0          | 0          | 0          | 0          | 0          | 33         |
| 0          | 0          | 0          | 0          | 0          | 0          | 0          | 0          | 0          | 0          | 20         |
| 0          | 0          | 0          | 0          | 0          | 0          | 0          | 0          | 0          | 0          | 0          |
| 0          | 0          | 0          | 0          | 0          | 0          | 0          | 0          | 0          | 0          | 0          |
| 13         | 0          | 0          | 0          | 0          | 13         | 0          | 0          | 0          | 7          | 0          |
| 0          | 0          | 0          | 0          | 0          | 60         | 0          | 0          | 0          | 0          | 0          |
| 0          | 0          | 0          | 0          | 0          | 0          | 0          | 4          | 0          | 0          | 0          |
| 0          | 0          | 0          | 0          | 0          | 0          | 0          | 24         | 0          | 0          | 0          |
| 0          | 0          | 0          | 0          | 0          | 0          | 0          | 0          | 0          | 0          | 0          |
| 0          | 0          | 0          | 0          | 0          | 0          | 0          | 0          | 0          | 0          | 0          |
| 2          | 0          | 0          | 0          | 0          | 0          | 0          | 0          | 0          | 0          | 0          |
| 0          | 0          | 0          | 0          | 0          | 0          | 0          | 0          | 0          | 0          | 0          |
| 0          | 0          | 0          | 0          | 0          | 0          | 0          | 0          | 0          | 0          | 0          |
| 0          | 1          | 0          | 0          | 0          | 0          | 3          | 0          | 0          | 0          | 0          |
| 5          | 0          | 0          | 0          | 0          | 0          | 0          | 0          | 0          | 0          | 0          |
| 0          | 0          | 0          | 0          | 0          | 0          | 0          | 0          | 12         | 0          | 0          |
| 0          | 0          | 0          | 0          | 0          | 0          | 0          | 0          | 0          | 0          | 0          |
| 0          | 0          | 0          | 0          | 0          | 0          | 0          | 2          | 0          | 2          | 0          |
| 4          | 0          | 0          | 0          | 0          | 3          | 1          | 0          | 0          | 0          | 0          |
| 0          | 0          | 0          | 0          | 0          | 0          | 0          | 0          | 0          | 0          | 0          |
| 7.0E-02    | 1.1E-01    | 0.0E+00    | 7.2E-02    | 1.6E-01    | 5.2E-01    | 2.7E-01    | 1.5E+00    | 6.6E-01    | 6.6E-01    | 1.5E-01    |
| 8.8E-02    | 6.5E-01    | 6.1E-01    | 4.6E-01    | 5.9E-01    | 7.4E-01    | 4.9E-01    | 1.3E-01    | 2.7E-01    | 2.8E-01    | 2.3E-01    |
| 15         | 16         | 7          | 10         | 11         | 15         | 6          | 8          | 16         | 12         | 13         |
| -5.0E-01   | 1.0E+00    | 3.8E-01    | 7.3E-01    | -1.4E+00   | -2.1E-01   | -9.0E-01   | 5.6E-01    | 7.1E-02    | 3.8E-01    | 1.8E-01    |
| 0.0E+00    |

| Common_Low | Common_Low | Common_Low | Common_Rare |
|------------|------------|------------|-------------|-------------|-------------|-------------|-------------|-------------|-------------|
| Atpeg0120  | Atpeg0128  | Atpeg0155  | At_F0076    | At_F0138    | At_F0228    | At_F0483    | At_F0522    | At_F0533    | At_F0606    |
| NA         | NA         | NA         | -           | -           | -           | -           | -           | -           | -           |
| 1.4E-02    | 4.5E-03    | 7.9E-03    | 1.0E-02     | 5.0E-03     | 4.3E-03     | 5.7E-03     | 3.7E-03     | 3.5E-03     | 9.2E-03     |
| 6.8E-03    | 5.8E-03    | 7.5E-03    | 8.4E-03     | 4.8E-03     | 6.9E-03     | 2.3E-03     | 3.3E-03     | 1.7E-03     | 8.3E-03     |
| 1.4E-02    | 2.8E-03    | 1.9E-02    | 1.8E-02     | 8.6E-03     | 4.1E-03     | 6.7E-03     | 1.2E-02     | 2.0E-03     | 1.1E-02     |
| 1.9E-01    | 4.9E-02    | 8.9E-02    | 1.1E-01     | 6.7E-02     | 4.6E-02     | 6.5E-02     | 5.9E-02     | 5.0E-02     | 1.2E-01     |
| 8.3E-02    | 6.6E-02    | 6.7E-02    | 5.3E-02     | 4.7E-02     | 5.3E-02     | 2.6E-02     | 8.9E-02     | 3.9E-02     | 1.0E-01     |
| 1.3E-01    | 5.1E-02    | 9.5E-02    | 1.6E-01     | 1.4E-01     | 4.8E-02     | 5.9E-02     | 1.5E-01     | 8.3E-02     | 1.5E-01     |
| 1.3E+00    | 2.9E+00    | 3.0E+01    | 1.3E+00     | 9.1E+00     | 6.5E+00     | 1.1E+01     | 6.9E-01     | 0.0E+00     | 0.0E+00     |
| 0          | 0          | 0          | 0           | 0           | 4           | 0           | 0           | 0           | 0           |
| 0          | 0          | 0          | 0           | 0           | 0           | 0           | 1           | 0           | 0           |
| 100        | 0          | 0          | 20          | 0           | 0           | 0           | 0           | 0           | 0           |
| 0          | 0          | 0          | 0           | 0           | 0           | 0           | 0           | 0           | 50          |
| 11         | 0          | 0          | 0           | 0           | 25          | 0           | 0           | 0           | 25          |
| 40         | 0          | 0          | 0           | 0           | 0           | 23          | 0           | 0           | 0           |
| 0          | 40         | 0          | 6           | 33          | 0           | 11          | 0           | 0           | 0           |
| 0          | 7          | 0          | 0           | 38          | 60          | 0           | 0           | 0           | 0           |
| 5          | 26         | 0          | 7           | 0           | 0           | 0           | 0           | 0           | 0           |
| 0          | 0          | 0          | 0           | 0           | 0           | 0           | 3           | 0           | 0           |
| 0          | 0          | 40         | 0           | 0           | 0           | 0           | 0           | 0           | 7           |
| 0          | 0          | 43         | 0           | 25          | 0           | 75          | 0           | 0           | 0           |
| 0          | 0          | 0          | 0           | 100         | 0           | 0           | 0           | 55          | 0           |
| 0          | 0          | 0          | 100         | 11          | 0           | 0           | 0           | 9           | 0           |
| 0          | 0          | 0          | 0           | 0           | 0           | 0           | 0           | 4           | 0           |
| 0          | 0          | 0          | 0           | 0           | 0           | 0           | 0           | 17          | 0           |
| 0          | 0          | 0          | 0           | 0           | 0           | 0           | 0           | 100         | 0           |
| 50         | 0          | 0          | 0           | 0           | 0           | 0           | 0           | 0           | 0           |
| 0          | 0          | 0          | 0           | 0           | 0           | 0           | 0           | 0           | 0           |
| 0          | 0          | 0          | 0           | 0           | 0           | 0           | 0           | 0           | 0           |
| 0          | 0          | 0          | 0           | 0           | 0           | 0           | 0           | 0           | 0           |
| 0          | 0          | 0          | 0           | 0           | 0           | 0           | 0           | 0           | 0           |
| 0          | 0          | 0          | 0           | 0           | 0           | 0           | 0           | 0           | 0           |
| 0          | 0          | 0          | 0           | 0           | 10          | 0           | 0           | 0           | 0           |
| 0          | 0          | 0          | 0           | 0           | 0           | 0           | 0           | 0           | 0           |
| 0          | 0          | 0          | 0           | 0           | 0           | 0           | 0           | 17          | 0           |
| 0          | 0          | 0          | 50          | 0           | 0           | 0           | 0           | 8           | 0           |
| 0          | 0          | 0          | 0           | 0           | 0           | 0           | 0           | 5           | 0           |
| 0          | 0          | 0          | 0           | 0           | 0           | 0           | 0           | 9           | 0           |
| 0          | 0          | 0          | 0           | 0           | 0           | 0           | 0           | 50          | 0           |
| 56         | 0          | 0          | 0           | 0           | 0           | 0           | 0           | 0           | 0           |
| 17         | 0          | 0          | 0           | 0           | 0           | 0           | 0           | 0           | 0           |
| 0          | 0          | 0          | 0           | 0           | 0           | 0           | 0           | 0           | 0           |
| 0          | 0          | 0          | 0           | 0           | 0           | 0           | 0           | 0           | 0           |
| 0          | 0          | 0          | 0           | 0           | 0           | 0           | 0           | 0           | 0           |
| 0          | 0          | 0          | 0           | 0           | 0           | 0           | 0           | 0           | 0           |
| 0          | 0          | 0          | 0           | 0           | 0           | 0           | 2           | 0           | 0           |
| 0          | 0          | 0          | 0           | 0           | 0           | 0           | 0           | 0           | 0           |
| 0          | 0          | 0          | 0           | 0           | 0           | 0           | 0           | 0           | 0           |
| 0          | 0          | 0          | 0           | 0           | 0           | 0           | 0           | 6           | 0           |
| 0          | 0          | 0          | 0           | 0           | 0           | 0           | 0           | 4           | 0           |
| 0          | 0          | 0          | 32          | 0           | 0           | 0           | 0           | 4           | 0           |
| 0          | 0          | 1          | 0           | 0           | 0           | 1           | 0           | 0           | 0           |
| 0          | 0          | 0          | 0           | 0           | 0           | 0           | 0           | 0           | 4           |
| 0          | 0          | 0          | 0           | 0           | 0           | 0           | 0           | 0           | 0           |
| 9.7E-01    | 1.3E-01    | 7.1E-01    | 4.6E-02     | 5.6E-01     | 6.2E-02     | 6.1E-01     | 4.2E-01     | 2.1E-01     | 2.4E-01     |
| 7.8E-01    | 6.7E-02    | 4.5E-01    | 2.5E-01     | 4.6E-01     | 3.0E-01     | 3.0E-01     | 6.7E-01     | 3.2E-01     | 2.7E-01     |
| 11         | 12         | 16         | 16          | 7           | 17          | 12          | 13          | 11          | 11          |
| -2.4E-01   | 4.1E-01    | 4.4E-01    | 3.6E-01     | -3.0E-01    | -6.2E+00    | 4.7E-01     | 3.6E-01     | 6.4E-01     | -8.1E-01    |
| 0.0E+00    | 0.0E+00    | 0.0E+00    | 1.3E+01     | 5.5E+00     | 4.4E+01     | 2.9E+00     | 6.0E+01     | 6.2E+00     | 1.8E+00     |

| Common_Rare |
|-------------|-------------|-------------|-------------|-------------|-------------|-------------|-------------|-------------|-------------|
| At_F0614    | At_F0677    | At_F0055    | At_F0085    | At_F0252    | At_F0271    | At_F0369    | At_F0398    | At_F0411    | At_F0478    |
| -           | -           | -           | -           | -           | -           | -           | -           | -           | -           |
| 1.0E-02     | 1.0E-02     | 9.1E-03     | 4.4E-03     | 9.1E-03     | 2.0E-03     | 1.2E-02     | 1.2E-02     | 9.8E-03     | 5.8E-03     |
| 6.1E-03     | 1.2E-02     | 2.9E-03     | 3.4E-03     | 1.2E-02     | 5.1E-03     | 1.1E-02     | 4.4E-03     | 2.7E-03     | 7.3E-03     |
| 7.8E-03     | 1.1E-02     | 1.2E-03     | 4.4E-03     | 1.1E-02     | 5.3E-03     | 6.8E-03     | 7.9E-03     | 6.7E-03     | 8.0E-03     |
| 1.1E-01     | 8.5E-02     | 7.8E-02     | 7.0E-02     | 4.5E-02     | 9.5E-02     | 1.0E-01     | 1.3E-01     | 6.5E-02     | 1.3E-01     |
| 6.9E-02     | 1.0E-01     | 5.3E-02     | 6.5E-02     | 4.3E-02     | 9.4E-02     | 8.7E-02     | 6.9E-02     | 6.1E-02     | 5.8E-02     |
| 1.6E-01     | 1.5E-01     | 3.2E-02     | 6.1E-02     | 4.2E-02     | 1.1E-01     | 7.5E-02     | 9.3E-02     | 6.8E-02     | 8.1E-02     |
| 0.0E+00     | 3.3E+01     | 6.1E+00     | 6.9E+00     | 0.0E+00     | 0.0E+00     | 5.8E+00     | 0.0E+00     | 0.0E+00     | 0.0E+00     |
| 0           | 28          | 5           | 0           | 0           | 0           | 0           | 0           | 0           | 0           |
| 0           | 1           | 1           | 0           | 1           | 1           | 1           | 0           | 1           | 0           |
| 0           | 100         | 0           | 17          | 0           | 0           | 0           | 40          | 0           | 0           |
| 0           | 55          | 0           | 0           | 0           | 0           | 5           | 0           | 0           | 0           |
| 0           | 23          | 0           | 0           | 0           | 0           | 28          | 0           | 0           | 0           |
| 0           | 53          | 0           | 0           | 0           | 0           | 0           | 0           | 0           | 0           |
| 0           | 63          | 0           | 0           | 0           | 0           | 0           | 0           | 0           | 0           |
| 0           | 20          | 43          | 0           | 0           | 0           | 19          | 0           | 0           | 0           |
| 0           | 22          | 0           | 0           | 0           | 0           | 16          | 0           | 0           | 0           |
| 0           | 26          | 0           | 10          | 0           | 0           | 0           | 0           | 0           | 0           |
| 0           | 39          | 0           | 6           | 0           | 0           | 0           | 0           | 0           | 0           |
| 0           | 79          | 14          | 13          | 0           | 0           | 0           | 0           | 0           | 0           |
| 0           | 0           | 0           | 0           | 0           | 0           | 0           | 0           | 0           | 0           |
| 100         | 0           | 0           | 0           | 0           | 15          | 0           | 0           | 0           | 0           |
| 0           | 0           | 0           | 0           | 7           | 7           | 0           | 0           | 0           | 20          |
| 0           | 0           | 0           | 0           | 36          | 0           | 0           | 0           | 0           | 100         |
| 100         | 0           | 0           | 0           | 0           | 0           | 0           | 0           | 0           | 0           |
| 0           | 33          | 0           | 0           | 0           | 0           | 0           | 0           | 0           | 0           |
| 0           | 23          | 0           | 11          | 0           | 0           | 0           | 0           | 0           | 0           |
| 0           | 17          | 0           | 0           | 0           | 0           | 0           | 0           | 0           | 0           |
| 0           | 40          | 0           | 0           | 0           | 0           | 0           | 0           | 0           | 0           |
| 0           | 25          | 0           | 0           | 0           | 0           | 0           | 0           | 0           | 0           |
| 0           | 0           | 0           | 0           | 0           | 0           | 0           | 0           | 0           | 0           |
| 0           | 0           | 10          | 0           | 0           | 0           | 0           | 0           | 0           | 0           |
| 0           | 8           | 0           | 0           | 0           | 0           | 0           | 0           | 0           | 0           |
| 0           | 29          | 0           | 0           | 0           | 0           | 0           | 0           | 0           | 0           |
| 0           | 44          | 0           | 0           | 0           | 0           | 0           | 0           | 0           | 0           |
| 0           | 0           | 0           | 0           | 0           | 0           | 0           | 0           | 0           | 0           |
| 100         | 0           | 0           | 0           | 0           | 7           | 0           | 0           | 0           | 0           |
| 0           | 0           | 0           | 0           | 0           | 7           | 0           | 0           | 0           | 0           |
| 0           | 0           | 0           | 0           | 0           | 0           | 0           | 0           | 0           | 0           |
| 67          | 0           | 0           | 0           | 0           | 0           | 0           | 0           | 0           | 0           |
| 0           | 0           | 0           | 0           | 4           | 0           | 0           | 0           | 0           | 0           |
| 0           | 0           | 0           | 0           | 2           | 0           | 0           | 0           | 0           | 0           |
| 0           | 0           | 0           | 0           | 0           | 0           | 0           | 0           | 0           | 0           |
| 0           | 0           | 0           | 0           | 0           | 0           | 2           | 0           | 0           | 0           |
| 0           | 4           | 0           | 0           | 0           | 7           | 0           | 0           | 3           | 0           |
| 0           | 0           | 0           | 0           | 6           | 0           | 0           | 0           | 0           | 0           |
| 0           | 1           | 1           | 0           | 0           | 0           | 0           | 0           | 0           | 0           |
| 0           | 0           | 0           | 0           | 0           | 0           | 1           | 0           | 0           | 0           |
| 0           | 0           | 0           | 0           | 3           | 0           | 0           | 0           | 0           | 0           |
| 0           | 2           | 0           | 0           | 0           | 7           | 0           | 0           | 2           | 0           |
| 0           | 0           | 0           | 2           | 0           | 0           | 0           | 0           | 0           | 0           |
| 0           | 0           | 0           | 0           | 0           | 11          | 5           | 0           | 0           | 0           |
| 0           | 0           | 3           | 0           | 0           | 0           | 0           | 0           | 0           | 0           |
| 14          | 0           | 0           | 0           | 0           | 0           | 0           | 0           | 0           | 0           |
| 48          | 3           | 0           | 0           | 0           | 0           | 0           | 0           | 0           | 0           |
| 1.6E+00     | 9.2E-01     | 3.2E-01     | 1.2E-01     | 1.3E-01     | 2.3E+00     | 1.6E-01     | 2.7E-01     | 3.4E-01     | 1.7E+00     |
| 3.3E-01     | 5.0E-02     | 2.5E-01     | 1.2E-01     | 2.9E-01     | 3.5E-01     | 1.9E-01     | 3.0E-01     | 2.5E-01     | 4.2E-01     |
| 8           | 16          | 12          | 7           | 12          | 6           | 13          | 12          | 15          | 8           |
| 3.3E-01     | -9.9E-01    | -2.3E-01    | -2.0E+00    | -7.6E-02    | -8.0E-02    | 4.8E-01     | 4.3E-01     | -2.0E-02    | 0.0E+00     |
| 1.3E+01     | 1.9E+00     | 0.0E+00     |

| Common_Rare | Common_Rare | Common_Rare | Specific_High |
|-------------|-------------|-------------|---------------|---------------|---------------|---------------|---------------|---------------|---------------|---------------|
| At_F0539    | At_F0643    | Atpeg0092   | At_F0011      | At_F0013      | At_F0024      | At_F0027      | At_F0029      | At_F0030      | At_F0052      | At_F0072      |
| -           | -           | NA          | -             | -             | -             | -             | -             | -             | -             | -             |
| 1.6E-03     | 1.2E-02     | 6.5E-03     | 9.1E-03       | 5.0E-03       | 6.3E-03       | 5.9E-04       | 9.9E-04       | 2.3E-03       | 4.5E-03       | 2.1E-03       |
| 3.7E-03     | 1.2E-02     | 9.7E-03     | 1.3E-03       | 2.1E-03       | 6.3E-04       | 1.6E-03       | 1.5E-03       | 6.9E-04       | 3.4E-03       | 6.3E-03       |
| 1.1E-02     | 1.8E-03     | 1.4E-02     | 5.6E-03       | 2.4E-03       | 1.6E-03       | 8.0E-04       | 1.4E-02       | 1.2E-03       | 6.9E-03       | 8.6E-03       |
| 4.3E-02     | 1.0E-01     | 9.3E-02     | 1.4E-01       | 7.4E-02       | 1.2E-01       | 3.3E-02       | 5.7E-02       | 3.2E-02       | 1.0E-01       | 5.4E-02       |
| 5.0E-02     | 7.9E-02     | 8.6E-02     | 3.9E-02       | 4.3E-02       | 1.7E-02       | 2.9E-02       | 3.1E-02       | 3.7E-02       | 3.6E-02       | 7.0E-02       |
| 9.0E-02     | 4.0E-02     | 1.1E-01     | 1.3E-01       | 5.5E-02       | 3.9E-02       | 4.3E-02       | 7.5E-02       | 3.1E-02       | 6.3E-02       | 1.4E-01       |
| 0.0E+00     | 0.0E+00     | 5.3E+00     | 0.0E+00       | 0.0E+00       | 0.0E+00       | 0.0E+00       | 4.5E+00       | 8.0E+00       | 1.0E+00       | 6.7E+00       |
| 0           | 0           | 0           | 0             | 0             | 0             | 0             | 0             | 0             | 0             | 0             |
| 0           | 0           | 0           | 0             | 0             | 0             | 0             | 0             | 0             | 0             | 0             |
| 0           | 0           | 0           | 0             | 0             | 0             | 0             | 0             | 0             | 0             | 20            |
| 0           | 0           | 0           | 0             | 0             | 0             | 0             | 0             | 0             | 0             | 0             |
| 0           | 0           | 0           | 14            | 0             | 0             | 0             | 0             | 0             | 0             | 0             |
| 0           | 0           | 0           | 33            | 0             | 0             | 0             | 8             | 17            | 0             | 0             |
| 0           | 0           | 0           | 0             | 0             | 0             | 0             | 57            | 67            | 0             | 0             |
| 0           | 0           | 0           | 0             | 0             | 0             | 0             | 0             | 0             | 0             | 0             |
| 0           | 0           | 0           | 0             | 0             | 0             | 0             | 0             | 0             | 0             | 29            |
| 0           | 0           | 0           | 0             | 0             | 0             | 0             | 0             | 0             | 0             | 0             |
| 0           | 0           | 0           | 0             | 0             | 0             | 0             | 0             | 0             | 9             | 0             |
| 0           | 0           | 50          | 0             | 0             | 0             | 0             | 50            | 73            | 0             | 19            |
| 0           | 0           | 0           | 0             | 0             | 0             | 0             | 0             | 0             | 0             | 0             |
| 0           | 0           | 0           | 0             | 0             | 0             | 0             | 0             | 0             | 0             | 0             |
| 0           | 0           | 0           | 28            | 6             | 0             | 0             | 0             | 0             | 0             | 0             |
| 0           | 17          | 0           | 33            | 27            | 0             | 0             | 0             | 0             | 0             | 0             |
| 0           | 100         | 0           | 88            | 0             | 0             | 0             | 0             | 0             | 0             | 0             |
| 0           | 0           | 0           | 0             | 0             | 0             | 0             | 0             | 0             | 0             | 0             |
| 0           | 0           | 0           | 0             | 0             | 0             | 0             | 0             | 0             | 0             | 0             |
| 0           | 0           | 0           | 14            | 0             | 0             | 0             | 0             | 0             | 0             | 0             |
| 0           | 0           | 0           | 0             | 0             | 0             | 0             | 0             | 0             | 0             | 0             |
| 0           | 0           | 0           | 0             | 0             | 0             | 0             | 0             | 0             | 0             | 0             |
| 0           | 0           | 0           | 0             | 0             | 0             | 0             | 0             | 0             | 0             | 0             |
| 0           | 0           | 0           | 0             | 0             | 0             | 0             | 0             | 0             | 0             | 0             |
| 0           | 0           | 0           | 0             | 0             | 0             | 0             | 0             | 0             | 0             | 0             |
| 0           | 0           | 0           | 0             | 0             | 0             | 0             | 0             | 0             | 0             | 0             |
| 0           | 0           | 0           | 0             | 0             | 0             | 0             | 0             | 0             | 0             | 0             |
| 0           | 0           | 0           | 0             | 0             | 0             | 0             | 0             | 0             | 0             | 0             |
| 0           | 0           | 0           | 0             | 0             | 0             | 0             | 0             | 0             | 0             | 0             |
| 0           | 0           | 0           | 0             | 0             | 0             | 0             | 0             | 0             | 0             | 0             |
| 0           | 0           | 0           | 0             | 0             | 0             | 0             | 0             | 0             | 0             | 0             |
| 0           | 0           | 0           | 0             | 0             | 0             | 0             | 0             | 0             | 0             | 0             |
| 0           | 0           | 0           | 0             | 0             | 0             | 0             | 0             | 0             | 0             | 0             |
| 0           | 0           | 0           | 0             | 0             | 0             | 0             | 0             | 0             | 0             | 0             |
| 0           | 0           | 0           | 0             | 0             | 0             | 0             | 0             | 0             | 0             | 0             |
| 0           | 0           | 0           | 25            | 0             | 0             | 0             | 0             | 0             | 0             | 0             |
| 0           | 0           | 0           | 33            | 0             | 0             | 0             | 0             | 0             | 0             | 0             |
| 0           | 0           | 0           | 0             | 0             | 0             | 0             | 0             | 0             | 0             | 0             |
| 0           | 0           | 0           | 0             | 3             | 0             | 0             | 0             | 0             | 0             | 0             |
| 3           | 0           | 0           | 0             | 0             | 0             | 0             | 0             | 0             | 0             | 2             |
| 2           | 0           | 0           | 0             | 0             | 0             | 0             | 0             | 0             | 0             | 0             |
| 0           | 0           | 0           | 0             | 0             | 0             | 0             | 0             | 0             | 0             | 4             |
| 0           | 0           | 0           | 0             | 0             | 0             | 0             | 0             | 0             | 0             | 0             |
| 0           | 0           | 0           | 0             | 0             | 0             | 0             | 0             | 0             | 0             | 0             |
| 0           | 0           | 0           | 0             | 0             | 0             | 0             | 0             | 0             | 0             | 0             |
| 0           | 0           | 0           | 0             | 0             | 0             | 0             | 0             | 0             | 1             | 0             |
| 0           | 0           | 0           | 0             | 0             | 0             | 0             | 0             | 0             | 2             | 0             |
| 4           | 0           | 0           | 0             | 0             | 0             | 0             | 0             | 0             | 0             | 0             |
| 0           | 0           | 0           | 3             | 0             | 0             | 0             | 0             | 2             | 0             | 0             |
| 0           | 0           | 0           | 0             | 0             | 0             | 0             | 0             | 0             | 0             | 0             |
| 0           | 0           | 0           | 0             | 0             | 0             | 0             | 0             | 0             | 0             | 0             |
| 3           | 0           | 0           | 0             | 0             | 0             | 0             | 0             | 0             | 0             | 0             |
| 1.0E+00     | 1.9E+00     | 2.5E-01     | 8.5E-02       | 5.6E-02       | 1.7E-01       | 7.7E-02       | 9.2E-02       | 9.1E-02       | 1.7E-01       | 1.2E-01       |
| 3.0E-01     | 2.0E-01     | 2.2E-01     | 1.1E-01       | 9.4E-02       | 3.8E-01       | 2.3E-01       | 2.7E-01       | 2.1E-01       | 4.4E-01       | 1.3E-01       |
| 8           | 16          | 12          | 2             | 2             | 2             | 2             | 2             | 2             | 2             | 2             |
| 0.0E+00     | 3.6E-01     | -9.3E-02    | -5.2E-01      | -7.0E-01      | 3.0E-01       | 3.3E-02       | -6.0E-01      | 8.5E-01       | -2.3E-01      | 2.6E-02       |
| 0.0E+00     | 0.0E+00     | 0.0E+00     | 3.8E+01       | 3.8E+01       | 4.3E+01       | 2.8E+01       | 1.2E+02       | 6.9E+01       | 4.8E+01       | 6.1E+00       |

| Specific_High |
|---------------|---------------|---------------|---------------|---------------|---------------|---------------|---------------|---------------|---------------|---------------|
| At_F0081      | At_F0086      | At_F0109      | At_F0122      | At_F0125      | At_F0132      | At_F0134      | At_F0136      | At_F0146      | At_F0152      | At_F0183      |
| -             | -             | -             | -             | -             | -             | -             | -             | -             | -             | -             |
| 3.5E-03       | 3.7E-03       | 9.6E-03       | 8.4E-03       | 2.0E-03       | 9.2E-04       | 3.0E-03       | 2.1E-03       | 3.0E-03       | 5.7E-03       | 3.5E-03       |
| 1.2E-02       | 3.5E-03       | 1.3E-03       | 8.2E-03       | 2.5E-03       | 1.0E-03       | 2.5E-03       | 2.8E-03       | 3.7E-03       | 1.4E-03       | 2.0E-03       |
| 8.1E-03       | 1.5E-03       | 1.4E-03       | 6.8E-03       | 2.2E-03       | 1.6E-03       | 1.2E-03       | 1.4E-03       | 2.6E-03       | 4.6E-03       | 1.7E-03       |
| 7.5E-02       | 5.2E-02       | 1.2E-01       | 9.7E-02       | 3.3E-02       | 4.5E-02       | 5.9E-02       | 6.8E-02       | 7.6E-02       | 6.3E-02       | 4.6E-02       |
| 7.9E-02       | 2.9E-02       | 2.7E-02       | 9.4E-02       | 3.8E-02       | 2.5E-02       | 4.6E-02       | 5.5E-02       | 8.7E-02       | 3.5E-02       | 5.5E-02       |
| 7.8E-02       | 3.7E-02       | 1.8E-02       | 1.2E-01       | 3.4E-02       | 2.5E-02       | 5.6E-02       | 3.0E-02       | 8.4E-02       | 5.2E-02       | 5.7E-02       |
| 7.7E+00       | 0.0E+00       | 1.1E+00       | 0.0E+00       | 1.3E+00       | 3.3E+00       | 1.6E+01       | 5.1E+00       | 0.0E+00       | 0.0E+00       | 0.0E+00       |
| 0             | 0             | 0             | 0             | 3             | 0             | 0             | 2             | 0             | 0             | 0             |
| 0             | 0             | 1             | 0             | 0             | 0             | 0             | 0             | 0             | 0             | 0             |
| 0             | 0             | 50            | 0             | 0             | 0             | 0             | 0             | 0             | 0             | 0             |
| 0             | 0             | 33            | 0             | 0             | 0             | 0             | 0             | 0             | 0             | 0             |
| 0             | 0             | 0             | 0             | 0             | 0             | 0             | 0             | 0             | 0             | 0             |
| 0             | 0             | 0             | 0             | 0             | 0             | 54            | 0             | 0             | 0             | 0             |
| 0             | 0             | 0             | 0             | 0             | 33            | 60            | 0             | 0             | 0             | 0             |
| 0             | 0             | 0             | 0             | 0             | 0             | 0             | 0             | 0             | 0             | 0             |
| 0             | 0             | 5             | 0             | 0             | 0             | 0             | 0             | 0             | 0             | 0             |
| 15            | 0             | 0             | 0             | 6             | 0             | 0             | 0             | 0             | 0             | 0             |
| 0             | 0             | 0             | 0             | 0             | 0             | 54            | 19            | 0             | 0             | 0             |
| 15            | 0             | 0             | 0             | 0             | 30            | 50            | 25            | 0             | 0             | 0             |
| 50            | 0             | 0             | 0             | 0             | 0             | 0             | 0             | 0             | 0             | 0             |
| 13            | 0             | 0             | 0             | 0             | 0             | 0             | 0             | 0             | 0             | 0             |
| 46            | 0             | 0             | 0             | 0             | 0             | 0             | 10            | 0             | 0             | 0             |
| 0             | 0             | 0             | 0             | 0             | 25            | 10            | 0             | 0             | 0             | 0             |
| 0             | 0             | 0             | 0             | 0             | 0             | 50            | 0             | 0             | 0             | 0             |
| 0             | 0             | 0             | 0             | 0             | 0             | 0             | 0             | 0             | 0             | 0             |
| 0             | 0             | 67            | 0             | 0             | 0             | 0             | 0             | 0             | 0             | 0             |
| 0             | 0             | 0             | 0             | 0             | 0             | 0             | 0             | 0             | 0             | 0             |
| 0             | 0             | 0             | 0             | 0             | 0             | 0             | 0             | 0             | 0             | 0             |
| 0             | 0             | 0             | 0             | 0             | 0             | 0             | 0             | 0             | 0             | 0             |
| 0             | 0             | 0             | 0             | 0             | 0             | 0             | 0             | 0             | 0             | 0             |
| 0             | 0             | 0             | 0             | 5             | 0             | 0             | 0             | 0             | 0             | 0             |
| 0             | 0             | 0             | 0             | 0             | 0             | 0             | 5             | 0             | 0             | 0             |
| 0             | 0             | 0             | 0             | 0             | 0             | 0             | 0             | 0             | 0             | 0             |
| 0             | 0             | 0             | 0             | 0             | 0             | 0             | 0             | 0             | 0             | 0             |
| 33            | 0             | 0             | 0             | 0             | 0             | 0             | 0             | 0             | 0             | 0             |
| 6             | 0             | 0             | 0             | 0             | 0             | 0             | 0             | 0             | 0             | 0             |
| 0             | 0             | 0             | 0             | 0             | 0             | 0             | 0             | 0             | 0             | 0             |
| 0             | 0             | 0             | 0             | 0             | 0             | 0             | 0             | 0             | 0             | 0             |
| 0             | 0             | 18            | 0             | 0             | 0             | 0             | 0             | 0             | 0             | 0             |
| 0             | 0             | 3             | 0             | 0             | 0             | 0             | 0             | 0             | 0             | 0             |
| 0             | 0             | 0             | 0             | 0             | 0             | 0             | 0             | 0             | 0             | 0             |
| 0             | 0             | 0             | 0             | 0             | 0             | 0             | 0             | 0             | 0             | 0             |
| 0             | 0             | 0             | 0             | 0             | 0             | 0             | 0             | 0             | 0             | 0             |
| 0             | 0             | 0             | 0             | 0             | 0             | 0             | 0             | 0             | 0             | 0             |
| 0             | 0             | 0             | 0             | 0             | 0             | 0             | 0             | 0             | 0             | 0             |
| 0             | 0             | 3             | 0             | 0             | 0             | 0             | 0             | 0             | 0             | 0             |
| 0             | 0             | 0             | 0             | 3             | 0             | 0             | 5             | 0             | 0             | 0             |
| 0             | 0             | 0             | 0             | 0             | 0             | 0             | 0             | 0             | 0             | 0             |
| 0             | 0             | 0             | 0             | 0             | 0             | 0             | 0             | 1             | 0             | 0             |
| 0             | 0             | 0             | 0             | 0             | 0             | 2             | 0             | 0             | 0             | 0             |
| 0             | 0             | 0             | 0             | 0             | 0             | 0             | 0             | 3             | 0             | 0             |
| 1.3E-01       | 2.4E-01       | 7.3E-02       | 2.4E-01       | 1.1E-01       | 6.3E-02       | 2.4E+00       | 3.9E-01       | 5.0E-01       | 1.0E-01       | 1.4E-01       |
| 1.9E-01       | 2.6E-01       | 1.9E-01       | 3.0E-01       | 1.3E-01       | 3.1E-01       | 3.3E-01       | 1.3E-01       | 7.7E-02       | 1.5E-01       | 1.4E-01       |
| 3             | 2             | 2             | 2             | 2             | 2             | 2             | 2             | 2             | 2             | 2             |
| 1.3E-01       | 7.6E-01       | -1.3E+00      | 2.4E-02       | -1.3E+00      | 7.1E-01       | -3.3E+00      | -7.5E-01      | 2.8E-01       | 7.2E-01       | -1.2E+00      |
| 4.1E+01       | 6.6E+01       | 3.6E+01       | 4.7E+00       | 4.4E+01       | 4.2E+01       | 3.3E+01       | 5.6E+01       | 2.7E+01       | 3.7E+01       | 7.2E+01       |

| Specific_High |
|---------------|---------------|---------------|---------------|---------------|---------------|---------------|---------------|---------------|---------------|---------------|
| At_F0205      | At_F0232      | At_F0301      | At_F0310      | At_F0320      | At_F0346      | At_F0377      | At_F0421      | At_F0438      | At_F0467      | At_F0475      |
| -             | -             | -             | bm            | -             | -             | bm            | -             | -             | -             | -             |
| 7.7E-03       | 1.2E-03       | 3.4E-03       | 4.9E-03       | 1.0E-02       | 3.1E-03       | 9.1E-03       | 5.0E-03       | 5.1E-03       | 8.9E-04       | 2.7E-03       |
| 9.7E-04       | 3.6E-03       | 2.8E-03       | 2.0E-03       | 8.6E-03       | 2.4E-03       | 3.8E-03       | 1.4E-03       | 3.0E-03       | 1.5E-03       | 2.5E-03       |
| 1.6E-04       | 2.0E-03       | 3.4E-03       | 2.4E-03       | 9.9E-03       | 2.1E-03       | 6.7E-03       | 1.6E-03       | 6.1E-03       | 1.2E-03       | 3.6E-03       |
| 1.3E-01       | 4.1E-02       | 6.0E-02       | 8.0E-02       | 5.5E-02       | 5.2E-02       | 1.5E-01       | 6.3E-02       | 4.9E-02       | 3.0E-02       | 6.5E-02       |
| 2.6E-02       | 4.6E-02       | 5.5E-02       | 3.2E-02       | 5.1E-02       | 5.3E-02       | 5.9E-02       | 4.1E-02       | 4.2E-02       | 2.1E-02       | 5.3E-02       |
| 3.6E-02       | 3.8E-02       | 6.2E-02       | 3.6E-02       | 6.3E-02       | 5.6E-02       | 5.6E-02       | 4.1E-02       | 6.7E-02       | 2.9E-02       | 3.9E-02       |
| 0.0E+00       | 0.0E+00       | 2.0E+00       | 1.9E+01       | 1.4E+01       | 1.6E+01       | 2.8E+01       | 3.5E+00       | 1.4E+01       | 0.0E+00       | 2.6E+01       |
| 0             | 0             | 0             | 3             | 2             | 0             | 2             | 0             | 6             | 0             | 0             |
| 0             | 0             | 0             | 0             | 0             | 0             | 0             | 1             | 0             | 0             | 1             |
| 0             | 0             | 0             | 0             | 0             | 0             | 60            | 0             | 0             | 0             | 0             |
| 0             | 0             | 0             | 50            | 0             | 0             | 0             | 0             | 0             | 9             | 15            |
| 0             | 0             | 0             | 0             | 0             | 0             | 9             | 0             | 0             | 0             | 36            |
| 0             | 0             | 0             | 0             | 0             | 0             | 0             | 0             | 0             | 0             | 33            |
| 0             | 0             | 0             | 67            | 0             | 0             | 0             | 0             | 0             | 0             | 50            |
| 0             | 0             | 0             | 14            | 0             | 0             | 35            | 0             | 13            | 0             | 0             |
| 0             | 0             | 0             | 18            | 0             | 0             | 42            | 0             | 43            | 0             | 0             |
| 0             | 0             | 4             | 13            | 8             | 15            | 37            | 6             | 6             | 0             | 24            |
| 0             | 0             | 6             | 27            | 28            | 11            | 12            | 5             | 0             | 0             | 41            |
| 0             | 0             | 0             | 38            | 42            | 57            | 31            | 11            | 0             | 0             | 56            |
| 0             | 0             | 0             | 0             | 0             | 0             | 0             | 0             | 0             | 0             | 0             |
| 0             | 0             | 0             | 0             | 0             | 0             | 5             | 0             | 0             | 0             | 56            |
| 0             | 0             | 0             | 0             | 0             | 0             | 0             | 0             | 0             | 0             | 0             |
| 0             | 0             | 0             | 0             | 0             | 15            | 0             | 0             | 0             | 0             | 0             |
| 0             | 0             | 0             | 0             | 0             | 38            | 0             | 0             | 0             | 100           | 0             |
| 0             | 0             | 0             | 0             | 0             | 0             | 60            | 0             | 0             | 0             | 0             |
| 0             | 0             | 0             | 0             | 0             | 0             | 0             | 0             | 0             | 0             | 0             |
| 0             | 0             | 0             | 0             | 0             | 0             | 0             | 0             | 0             | 0             | 0             |
| 0             | 0             | 0             | 0             | 0             | 0             | 0             | 0             | 0             | 0             | 0             |
| 0             | 0             | 0             | 0             | 0             | 0             | 0             | 0             | 0             | 0             | 0             |
| 0             | 0             | 0             | 0             | 0             | 0             | 0             | 0             | 0             | 0             | 0             |
| 0             | 0             | 0             | 0             | 0             | 0             | 0             | 0             | 0             | 0             | 0             |
| 0             | 0             | 0             | 0             | 0             | 0             | 4             | 0             | 5             | 0             | 0             |
| 0             | 0             | 0             | 6             | 6             | 0             | 0             | 0             | 0             | 0             | 0             |
| 0             | 0             | 0             | 0             | 0             | 0             | 0             | 0             | 0             | 0             | 0             |
| 0             | 0             | 0             | 0             | 0             | 0             | 0             | 0             | 0             | 0             | 17            |
| 0             | 0             | 0             | 0             | 0             | 0             | 14            | 0             | 0             | 0             | 9             |
| 0             | 0             | 0             | 0             | 0             | 0             | 0             | 0             | 0             | 0             | 0             |
| 0             | 0             | 0             | 0             | 0             | 0             | 0             | 0             | 0             | 0             | 0             |
| 0             | 0             | 0             | 0             | 0             | 0             | 0             | 0             | 0             | 0             | 0             |
| 0             | 0             | 0             | 0             | 0             | 0             | 0             | 0             | 0             | 0             | 0             |
| 0             | 0             | 0             | 0             | 0             | 0             | 44            | 0             | 0             | 0             | 0             |
| 0             | 0             | 0             | 0             | 2             | 0             | 18            | 0             | 0             | 0             | 0             |
| 0             | 0             | 0             | 0             | 0             | 0             | 0             | 0             | 0             | 0             | 0             |
| 0             | 0             | 0             | 0             | 0             | 0             | 0             | 0             | 0             | 0             | 0             |
| 0             | 0             | 0             | 0             | 0             | 0             | 0             | 0             | 0             | 0             | 4             |
| 0             | 0             | 0             | 0             | 0             | 0             | 0             | 0             | 0             | 0             | 2             |
| 0             | 0             | 0             | 0             | 0             | 0             | 0             | 0             | 1             | 0             | 0             |
| 0             | 0             | 0             | 0             | 0             | 0             | 0             | 1             | 1             | 0             | 0             |
| 0             | 0             | 0             | 1             | 0             | 0             | 0             | 0             | 0             | 0             | 0             |
| 0             | 0             | 0             | 0             | 0             | 0             | 0             | 0             | 0             | 0             | 4             |
| 0             | 0             | 0             | 0             | 0             | 0             | 0             | 0             | 0             | 0             | 0             |
| 0             | 0             | 0             | 0             | 0             | 0             | 2             | 0             | 0             | 0             | 0             |
| 0             | 0             | 0             | 0             | 0             | 0             | 0             | 3             | 0             | 0             | 0             |
| 0             | 0             | 0             | 0             | 0             | 0             | 0             | 0             | 0             | 0             | 0             |
| 0             | 4             | 0             | 0             | 4             | 0             | 0             | 0             | 4             | 0             | 0             |
| 8.7E-02       | 3.9E-02       | 6.9E-02       | 6.0E-02       | 7.1E-02       | 8.5E-01       | 7.5E-02       | 1.5E-01       | 2.3E+00       | 4.0E-01       | 7.7E-02       |
| 1.9E-01       | 1.5E-01       | 3.4E-01       | 2.3E-01       | 3.4E-01       | 2.7E-01       | 2.0E-01       | 4.2E-01       | 3.4E-01       | 6.5E-01       | 1.9E-01       |
| 2             | 2             | 2             | 3             | 2             | 2             | 2             | 2             | 2             | 2             | 2             |
| 2.7E-01       | 1.5E-01       | -9.1E-01      | 0.0E+00       | 4.8E-01       | -2.9E-01      | 3.7E-01       | 8.0E-01       | 3.9E-01       | -1.4E+00      | -6.1E-01      |
| 5.5E+01       | 1.2E+02       | 2.5E+01       | 4.6E+01       | 5.1E+01       | 3.7E+01       | 3.8E+01       | 1.2E+02       | 6.9E+01       | 4.1E+02       | 1.3E+01       |

| Specific_High |
|---------------|---------------|---------------|---------------|---------------|---------------|---------------|---------------|---------------|---------------|---------------|---------------|
| At_F0486      | At_F0526      | At_F0531      | At_F0616      | At_F0620      | At_F0631      | At_F0680      | At_F0704      | At_F0033      | At_F0116      | At_F0223      |               |
| bm            | -             | -             | -             | -             | -             | -             | bm            | -             | -             | -             |               |
| 2.3E-03       | 1.1E-02       | 7.0E-03       | 1.3E-02       | 4.0E-03       | 8.3E-04       | 2.7E-03       | 1.3E-02       | 4.3E-03       | 2.3E-03       | 5.1E-03       |               |
| 9.7E-03       | 4.0E-03       | 3.6E-03       | 1.2E-03       | 1.8E-03       | 2.0E-03       | 3.4E-03       | 2.4E-03       | 2.4E-03       | 3.9E-03       | 1.6E-03       |               |
| 7.3E-03       | 1.6E-03       | 2.2E-03       | 2.6E-03       | 1.9E-03       | 2.7E-03       | 5.6E-03       | 7.8E-03       | 4.0E-03       | 2.7E-03       | 2.6E-03       |               |
| 3.2E-02       | 6.7E-02       | 1.3E-01       | 1.8E-01       | 5.3E-02       | 3.7E-02       | 4.5E-02       | 2.0E-01       | 6.9E-02       | 3.6E-02       | 3.8E-02       |               |
| 5.2E-02       | 4.6E-02       | 3.3E-02       | 1.8E-02       | 2.6E-02       | 4.5E-02       | 3.9E-02       | 5.4E-02       | 6.6E-02       | 5.8E-02       | 2.9E-02       |               |
| 4.0E-02       | 3.1E-02       | 6.0E-02       | 5.2E-02       | 4.1E-02       | 4.3E-02       | 6.8E-02       | 8.2E-02       | 8.5E-02       | 4.0E-02       | 4.3E-02       |               |
| 2.3E+01       | 2.6E+01       | 0.0E+00       | 2.0E+00       | 1.5E+01       | 1.4E+01       | 5.9E+00       | 2.4E+01       | 0.0E+00       | 0.0E+00       | 3.6E+00       |               |
| 0             | 0             | 0             | 0             | 0             | 0             | 0             | 9             | 0             | 0             | 0             |               |
| 0             | 0             | 0             | 0             | 0             | 0             | 0             | 3             | 0             | 0             | 0             |               |
| 0             | 0             | 0             | 100           | 0             | 0             | 33            | 0             | 0             | 0             | 0             |               |
| 0             | 13            | 0             | 33            | 0             | 0             | 0             | 20            | 0             | 0             | 0             |               |
| 0             | 37            | 0             | 0             | 0             | 0             | 0             | 36            | 0             | 0             | 13            |               |
| 0             | 33            | 0             | 0             | 0             | 0             | 0             | 29            | 0             | 0             | 11            |               |
| 0             | 100           | 0             | 0             | 0             | 0             | 0             | 0             | 0             | 0             | 0             |               |
| 0             | 50            | 0             | 0             | 0             | 0             | 25            | 0             | 0             | 0             | 19            |               |
| 12            | 40            | 0             | 0             | 0             | 0             | 0             | 67            | 0             | 0             | 0             |               |
| 29            | 32            | 0             | 0             | 12            | 0             | 0             | 20            | 0             | 0             | 0             |               |
| 21            | 8             | 0             | 0             | 13            | 33            | 0             | 0             | 0             | 0             | 0             |               |
| 70            | 0             | 0             | 33            | 71            | 63            | 0             | 43            | 0             | 0             | 0             |               |
| 0             | 0             | 0             | 100           | 0             | 0             | 0             | 100           | 0             | 0             | 0             |               |
| 0             | 0             | 0             | 0             | 0             | 0             | 0             | 0             | 0             | 0             | 0             |               |
| 0             | 0             | 0             | 0             | 0             | 0             | 0             | 21            | 0             | 0             | 0             |               |
| 0             | 0             | 0             | 0             | 0             | 0             | 0             | 33            | 0             | 0             | 0             |               |
| 0             | 0             | 0             | 0             | 0             | 0             | 0             | 0             | 0             | 0             | 0             |               |
| 17            | 0             | 0             | 100           | 0             | 0             | 0             | 0             | 0             | 0             | 0             |               |
| 0             | 0             | 0             | 0             | 0             | 0             | 0             | 0             | 0             | 0             | 0             |               |
| 0             | 0             | 0             | 0             | 0             | 0             | 0             | 10            | 0             | 0             | 0             |               |
| 0             | 0             | 0             | 0             | 0             | 0             | 0             | 17            | 0             | 0             | 0             |               |
| 0             | 0             | 0             | 0             | 0             | 0             | 0             | 0             | 0             | 0             | 0             |               |
| 0             | 0             | 0             | 0             | 0             | 0             | 0             | 0             | 0             | 0             | 0             |               |
| 0             | 0             | 0             | 0             | 0             | 0             | 0             | 11            | 0             | 0             | 0             |               |
| 0             | 0             | 0             | 0             | 0             | 0             | 0             | 6             | 0             | 0             | 0             |               |
| 0             | 0             | 0             | 0             | 0             | 0             | 0             | 0             | 0             | 0             | 4             |               |
| 0             | 0             | 0             | 0             | 0             | 0             | 0             | 0             | 0             | 0             | 0             |               |
| 0             | 0             | 0             | 0             | 0             | 0             | 0             | 0             | 0             | 0             | 0             |               |
| 0             | 0             | 0             | 0             | 0             | 0             | 0             | 0             | 0             | 0             | 0             |               |
| 0             | 0             | 0             | 0             | 0             | 0             | 0             | 0             | 0             | 0             | 0             |               |
| 0             | 6             | 0             | 0             | 0             | 0             | 0             | 0             | 0             | 0             | 0             |               |
| 0             | 0             | 0             | 0             | 0             | 0             | 0             | 0             | 0             | 0             | 0             |               |
| 0             | 0             | 0             | 0             | 0             | 0             | 0             | 0             | 0             | 0             | 0             |               |
| 0             | 0             | 0             | 0             | 0             | 0             | 0             | 0             | 0             | 0             | 0             |               |
| 0             | 0             | 0             | 0             | 0             | 0             | 0             | 0             | 0             | 0             | 0             |               |
| 0             | 0             | 0             | 0             | 0             | 0             | 0             | 0             | 0             | 0             | 0             |               |
| 0             | 0             | 0             | 0             | 0             | 0             | 0             | 0             | 0             | 0             | 0             |               |
| 0             | 0             | 0             | 0             | 0             | 0             | 0             | 0             | 0             | 0             | 0             |               |
| 0             | 0             | 0             | 0             | 0             | 0             | 0             | 0             | 0             | 0             | 0             |               |
| 0             | 0             | 0             | 0             | 0             | 0             | 0             | 0             | 0             | 0             | 0             |               |
| 0             | 3             | 0             | 0             | 0             | 0             | 0             | 0             | 0             | 0             | 4             |               |
| 0             | 0             | 0             | 0             | 0             | 0             | 0             | 0             | 4             | 0             | 0             |               |
| 0             | 0             | 0             | 0             | 0             | 0             | 0             | 0             | 1             | 0             | 0             |               |
| 0             | 0             | 0             | 0             | 0             | 0             | 0             | 0             | 0             | 0             | 2             |               |
| 0             | 0             | 0             | 0             | 0             | 0             | 0             | 0             | 0             | 0             | 0             |               |
| 2.1E-01       | 6.8E-02       | 5.3E-02       | 7.1E-02       | 9.8E-02       | 4.9E-01       | 1.2E-01       | 6.6E-01       | 8.7E-01       | 1.1E-01       | 4.9E-02       |               |
| 2.3E-01       | 1.6E-01       | 3.3E-01       | 8.5E-01       | 4.5E-01       | 1.2E-01       | 6.2E-02       | 4.7E-01       | 1.4E-01       | 5.7E-01       | 3.9E-01       |               |
| 2             | 2             | 2             | 2             | 2             | 2             | 2             | 2             | 0             | 1             | 2             |               |
| 3.2E-01       | 5.6E-01       | 8.5E-01       | -2.3E+00      | 6.4E-01       | -8.0E-01      | 1.7E-01       | 2.8E-01       | 0.0E+00       | 0.0E+00       | -1.4E+00      |               |
| 4.1E+01       | 3.7E+01       | 1.2E+02       | 1.2E+02       | 2.1E+02       | 1.9E+01       | 3.6E+00       | 5.1E+01       | 0.0E+00       | 0.0E+00       | 0.0E+00       |               |



| Specific_High |
|---------------|---------------|---------------|---------------|---------------|---------------|---------------|---------------|---------------|---------------|---------------|
| At_F0270      | At_F0273      | At_F0278      | At_F0279      | At_F0286      | At_F0334      | At_F0337      | At_F0359      | At_F0406      | At_F0441      | At_F0492      |
| -             | -             | -             | bm            | -             | -             | -             | bm            | -             | -             | -             |
| 4.3E-03       | 3.7E-03       | 3.8E-03       | 2.7E-03       | 3.9E-03       | 1.2E-02       | 2.7E-03       | 1.0E-02       | 2.0E-03       | 1.4E-02       | 1.6E-03       |
| 1.5E-03       | 7.6E-03       | 1.5E-03       | 1.5E-03       | 8.8E-03       | 1.4E-03       | 1.3E-03       | 7.1E-03       | 6.3E-04       | 4.4E-04       | 2.7E-04       |
| 3.4E-03       | 8.6E-03       | 5.2E-03       | 1.2E-03       | 4.3E-03       | 1.9E-03       | 2.1E-03       | 7.0E-03       | 4.0E-04       | 4.6E-04       | 1.8E-03       |
| 6.5E-02       | 5.9E-02       | 5.0E-02       | 4.4E-02       | 3.5E-02       | 1.8E-01       | 4.1E-02       | 5.3E-02       | 3.2E-02       | 6.6E-02       | 3.1E-02       |
| 3.5E-02       | 5.3E-02       | 3.4E-02       | 2.3E-02       | 6.8E-02       | 5.0E-02       | 2.5E-02       | 5.3E-02       | 2.6E-02       | 1.6E-02       | 1.4E-02       |
| 4.4E-02       | 1.0E-01       | 5.7E-02       | 3.4E-02       | 4.5E-02       | 4.5E-02       | 4.6E-02       | 3.7E-02       | 2.5E-02       | 1.5E-02       | 2.6E-02       |
| 2.1E+01       | 0.0E+00       | 1.1E+00       | 2.2E+01       | 0.0E+00       | 6.9E+00       | 0.0E+00       | 2.3E+01       | 1.3E+01       | 0.0E+00       | 1.4E+01       |
| 0             | 0             | 0             | 0             | 0             | 0             | 0             | 18            | 2             | 0             | 0             |
| 1             | 0             | 0             | 0             | 1             | 0             | 1             | 0             | 0             | 0             | 0             |
| 0             | 0             | 0             | 0             | 0             | 100           | 0             | 0             | 0             | 0             | 100           |
| 0             | 0             | 0             | 0             | 0             | 75            | 0             | 0             | 0             | 0             | 30            |
| 0             | 0             | 0             | 0             | 0             | 15            | 0             | 0             | 0             | 0             | 0             |
| 31            | 0             | 0             | 0             | 0             | 0             | 0             | 0             | 0             | 0             | 0             |
| 63            | 0             | 0             | 0             | 0             | 0             | 0             | 0             | 0             | 0             | 0             |
| 0             | 0             | 5             | 0             | 0             | 0             | 0             | 0             | 0             | 0             | 0             |
| 5             | 0             | 0             | 33            | 0             | 0             | 0             | 0             | 0             | 0             | 8             |
| 33            | 0             | 0             | 47            | 0             | 0             | 0             | 10            | 32            | 0             | 0             |
| 57            | 0             | 0             | 0             | 0             | 55            | 0             | 26            | 0             | 0             | 62            |
| 25            | 0             | 0             | 0             | 0             | 0             | 0             | 100           | 50            | 0             | 0             |
| 40            | 0             | 0             | 0             | 0             | 0             | 0             | 100           | 0             | 43            | 0             |
| 0             | 0             | 0             | 0             | 0             | 0             | 6             | 36            | 0             | 0             | 0             |
| 0             | 0             | 0             | 0             | 0             | 0             | 0             | 25            | 0             | 0             | 22            |
| 0             | 0             | 15            | 0             | 0             | 0             | 0             | 29            | 0             | 0             | 36            |
| 0             | 0             | 0             | 0             | 0             | 0             | 0             | 80            | 0             | 0             | 80            |
| 0             | 0             | 0             | 0             | 0             | 63            | 0             | 0             | 0             | 0             | 0             |
| 0             | 0             | 0             | 0             | 0             | 55            | 0             | 0             | 0             | 0             | 0             |
| 0             | 0             | 0             | 0             | 0             | 15            | 0             | 0             | 0             | 0             | 0             |
| 0             | 0             | 0             | 0             | 0             | 0             | 0             | 0             | 0             | 0             | 0             |
| 0             | 0             | 0             | 0             | 0             | 0             | 0             | 0             | 0             | 0             | 0             |
| 0             | 0             | 0             | 0             | 0             | 0             | 0             | 0             | 7             | 0             | 0             |
| 0             | 0             | 0             | 0             | 0             | 0             | 0             | 0             | 0             | 0             | 0             |
| 0             | 0             | 0             | 0             | 0             | 0             | 0             | 0             | 0             | 0             | 0             |
| 0             | 0             | 0             | 0             | 0             | 0             | 0             | 6             | 0             | 0             | 0             |
| 0             | 0             | 0             | 0             | 0             | 0             | 0             | 75            | 0             | 0             | 0             |
| 0             | 0             | 0             | 0             | 0             | 0             | 0             | 0             | 0             | 0             | 0             |
| 0             | 0             | 0             | 0             | 0             | 0             | 0             | 0             | 0             | 0             | 0             |
| 0             | 0             | 0             | 0             | 0             | 0             | 0             | 0             | 0             | 0             | 0             |
| 0             | 0             | 0             | 0             | 0             | 0             | 0             | 0             | 0             | 0             | 0             |
| 0             | 0             | 0             | 0             | 0             | 0             | 0             | 0             | 0             | 0             | 0             |
| 0             | 0             | 0             | 0             | 0             | 0             | 0             | 0             | 0             | 0             | 0             |
| 0             | 0             | 0             | 0             | 0             | 18            | 0             | 0             | 3             | 0             | 0             |
| 0             | 0             | 0             | 0             | 0             | 10            | 0             | 0             | 0             | 0             | 0             |
| 0             | 0             | 0             | 0             | 0             | 2             | 0             | 0             | 0             | 0             | 0             |
| 2             | 0             | 0             | 0             | 0             | 0             | 0             | 0             | 0             | 0             | 0             |
| 0             | 0             | 0             | 0             | 0             | 0             | 5             | 0             | 0             | 0             | 0             |
| 0             | 0             | 0             | 0             | 0             | 0             | 3             | 0             | 0             | 0             | 0             |
| 1             | 0             | 0             | 0             | 0             | 0             | 0             | 0             | 0             | 0             | 0             |
| 0             | 0             | 0             | 0             | 0             | 0             | 0             | 0             | 0             | 0             | 0             |
| 0             | 0             | 0             | 0             | 0             | 0             | 0             | 0             | 0             | 0             | 0             |
| 0             | 0             | 0             | 0             | 6             | 0             | 0             | 0             | 0             | 0             | 0             |
| 0             | 0             | 0             | 0             | 0             | 0             | 0             | 0             | 0             | 0             | 4             |
| 0             | 0             | 0             | 0             | 0             | 0             | 0             | 0             | 0             | 0             | 0             |
| 0             | 0             | 0             | 0             | 0             | 2             | 0             | 0             | 0             | 0             | 0             |
| 0             | 0             | 0             | 0             | 0             | 0             | 0             | 0             | 0             | 0             | 0             |
| 0             | 0             | 0             | 0             | 0             | 0             | 0             | 0             | 0             | 0             | 0             |
| 7.1E-02       | 0.0E+00       | 4.3E-01       | 8.2E-02       | 6.7E-02       | 2.1E-01       | 8.1E-01       | 1.0E-01       | 8.9E-02       | 2.6E-01       | 2.3E-01       |
| 2.0E-01       | 2.3E-01       | 3.2E-01       | 4.1E-01       | 4.7E-01       | 3.8E-01       | 4.4E-01       | 1.9E-01       | 3.3E-01       | 1.9E-01       | 5.8E-01       |
| 0             | 2             | 0             | 3             | 2             | 2             | 2             | 2             | 2             | 0             | 2             |
| 0.0E+00       | 1.1E-01       | 0.0E+00       | 0.0E+00       | -2.4E-01      | -2.9E-01      | -1.2E+00      | 1.9E-01       | 1.0E+00       | 0.0E+00       | 1.0E+00       |
| 0.0E+00       |



| Specific_Low |
|--------------|--------------|--------------|--------------|--------------|--------------|--------------|--------------|--------------|--------------|--------------|--------------|
| At_F0696     | At_F0002     | At_F0119     | At_F0158     | At_F0172     | At_F0348     | At_F0428     | At_F0155     | At_F0347     | At_F0435     | At_F0627     | At_F0192     |
| -            | -            | -            | -            | -            | -            | -            | -            | bm           | -            | -            | -            |
| 3.3E-03      | 3.6E-03      | 1.3E-02      | 3.9E-03      | 1.8E-03      | 1.1E-02      | 1.8E-02      | 1.1E-03      | 1.1E-02      | 3.4E-03      | 3.6E-03      | 1.7E-03      |
| 3.0E-03      | 3.0E-03      | 1.5E-02      | 3.2E-03      | 4.0E-03      | 8.4E-03      | 1.2E-02      | 1.6E-03      | 2.9E-03      | 1.0E-03      | 1.9E-03      | 2.7E-03      |
| 2.9E-03      | 2.4E-03      | 9.8E-03      | 4.7E-03      | 0.0E+00      | 8.6E-03      | 1.3E-02      | 1.7E-03      | 6.1E-03      | 8.6E-04      | 8.6E-03      | 2.8E-03      |
| 4.5E-02      | 4.7E-02      | 9.5E-02      | 4.4E-02      | 5.3E-02      | 9.3E-02      | 1.3E-01      | 3.5E-02      | 1.0E-01      | 3.1E-02      | 5.1E-02      | 2.1E-02      |
| 4.6E-02      | 3.9E-02      | 9.2E-02      | 3.9E-02      | 4.8E-02      | 8.8E-02      | 1.1E-01      | 4.5E-02      | 5.8E-02      | 1.2E-02      | 3.2E-02      | 5.2E-02      |
| 3.8E-02      | 4.7E-02      | 8.1E-02      | 4.6E-02      | 0.0E+00      | 1.6E-01      | 8.2E-02      | 4.0E-02      | 6.3E-02      | 2.9E-02      | 1.0E-01      | 3.9E-02      |
| 0.0E+00      | 0.0E+00      | 2.4E+00      | 0.0E+00      | 1.4E+00      | 1.7E+01      | 0.0E+00      | 0.0E+00      | 2.2E+01      | 0.0E+00      | 0.0E+00      | 8.3E+00      |
| 3            | 0            | 0            | 0            | 0            | 13           | 0            | 0            | 0            | 0            | 0            | 6            |
| 1            | 0            | 0            | 0            | 0            | 0            | 0            | 1            | 0            | 1            | 0            | 1            |
| 0            | 0            | 33           | 0            | 0            | 0            | 0            | 0            | 0            | 0            | 0            | 0            |
| 0            | 0            | 0            | 0            | 0            | 0            | 0            | 0            | 0            | 0            | 0            | 11           |
| 0            | 0            | 0            | 0            | 0            | 0            | 0            | 0            | 0            | 0            | 0            | 18           |
| 0            | 0            | 0            | 0            | 0            | 0            | 0            | 0            | 0            | 0            | 0            | 25           |
| 0            | 0            | 0            | 0            | 13           | 0            | 0            | 0            | 0            | 0            | 0            | 0            |
| 0            | 0            | 0            | 0            | 0            | 0            | 0            | 0            | 0            | 0            | 0            | 0            |
| 0            | 0            | 0            | 0            | 0            | 22           | 0            | 0            | 0            | 0            | 3            | 0            |
| 0            | 0            | 0            | 0            | 0            | 4            | 0            | 0            | 12           | 0            | 0            | 6            |
| 0            | 0            | 11           | 0            | 0            | 0            | 0            | 0            | 38           | 0            | 0            | 40           |
| 0            | 0            | 0            | 0            | 13           | 68           | 0            | 0            | 50           | 0            | 0            | 0            |
| 0            | 0            | 0            | 0            | 0            | 100          | 0            | 0            | 0            | 0            | 0            | 0            |
| 0            | 0            | 0            | 0            | 0            | 33           | 30           | 0            | 0            | 0            | 0            | 0            |
| 0            | 0            | 0            | 0            | 0            | 26           | 6            | 0            | 29           | 0            | 0            | 0            |
| 0            | 0            | 0            | 0            | 0            | 5            | 27           | 0            | 44           | 0            | 0            | 0            |
| 0            | 0            | 0            | 0            | 0            | 0            | 0            | 0            | 60           | 0            | 83           | 0            |
| 0            | 0            | 0            | 0            | 0            | 0            | 20           | 0            | 0            | 0            | 0            | 0            |
| 0            | 0            | 0            | 0            | 0            | 0            | 0            | 0            | 0            | 0            | 0            | 0            |
| 0            | 0            | 0            | 0            | 0            | 0            | 0            | 0            | 0            | 0            | 0            | 13           |
| 0            | 0            | 0            | 0            | 0            | 0            | 0            | 0            | 0            | 0            | 0            | 0            |
| 0            | 0            | 0            | 0            | 0            | 0            | 0            | 0            | 0            | 0            | 0            | 0            |
| 0            | 0            | 0            | 0            | 0            | 0            | 0            | 0            | 0            | 0            | 0            | 0            |
| 0            | 0            | 0            | 0            | 0            | 2            | 0            | 0            | 0            | 0            | 0            | 0            |
| 0            | 0            | 0            | 0            | 0            | 0            | 0            | 0            | 0            | 0            | 0            | 0            |
| 9            | 0            | 0            | 0            | 0            | 0            | 0            | 0            | 0            | 0            | 0            | 14           |
| 0            | 0            | 0            | 0            | 0            | 35           | 0            | 0            | 0            | 0            | 0            | 0            |
| 0            | 0            | 0            | 0            | 0            | 67           | 0            | 0            | 0            | 0            | 0            | 0            |
| 0            | 0            | 0            | 0            | 0            | 0            | 0            | 0            | 0            | 0            | 0            | 0            |
| 0            | 0            | 0            | 0            | 0            | 0            | 0            | 0            | 0            | 0            | 0            | 0            |
| 0            | 0            | 0            | 0            | 0            | 0            | 0            | 0            | 0            | 0            | 0            | 0            |
| 0            | 0            | 0            | 17           | 0            | 0            | 0            | 0            | 0            | 0            | 20           | 0            |
| 0            | 0            | 0            | 0            | 0            | 0            | 0            | 0            | 4            | 0            | 4            | 0            |
| 0            | 0            | 0            | 0            | 0            | 0            | 0            | 0            | 0            | 0            | 0            | 0            |
| 1            | 0            | 0            | 0            | 0            | 0            | 0            | 2            | 0            | 0            | 0            | 1            |
| 0            | 0            | 0            | 0            | 0            | 0            | 0            | 0            | 0            | 0            | 0            | 0            |
| 0            | 0            | 0            | 0            | 0            | 0            | 0            | 0            | 0            | 5            | 0            | 0            |
| 3            | 0            | 0            | 0            | 0            | 0            | 0            | 0            | 0            | 0            | 0            | 0            |
| 0            | 0            | 0            | 0            | 0            | 0            | 0            | 0            | 0            | 0            | 0            | 0            |
| 0            | 0            | 0            | 0            | 0            | 0            | 0            | 2            | 0            | 0            | 0            | 0            |
| 0            | 0            | 0            | 0            | 0            | 0            | 0            | 0            | 0            | 1            | 0            | 2            |
| 0            | 0            | 0            | 0            | 0            | 0            | 0            | 0            | 0            | 3            | 0            | 0            |
| 0            | 0            | 0            | 4            | 0            | 0            | 0            | 0            | 0            | 0            | 0            | 0            |
| 0            | 2            | 0            | 0            | 0            | 0            | 0            | 0            | 0            | 2            | 0            | 0            |
| 0            | 0            | 0            | 1            | 0            | 1            | 0            | 0            | 0            | 0            | 0            | 0            |
| 0            | 0            | 0            | 0            | 0            | 0            | 0            | 0            | 0            | 0            | 0            | 0            |
| 4            | 0            | 0            | 0            | 0            | 0            | 0            | 2            | 0            | 0            | 0            | 0            |
| 1.0E+00      | 6.3E-02      | 1.0E+00      | 2.6E-01      | 2.2E+00      | 3.0E-01      | 1.8E+00      | 4.5E-02      | 1.4E+00      | 3.7E-02      | 1.1E-01      | 5.9E-02      |
| 1.8E-01      | 2.6E-01      | 3.6E-01      | 3.0E-01      | 2.5E-01      | 2.5E-01      | 2.5E-01      | 5.3E-01      | 2.2E-01      | 2.5E-01      | 5.6E-01      | 4.2E-01      |
| 2            | 2            | 2            | 2            | 2            | 2            | 2            | 1            | 2            | 2            | 3            | 2            |
| 1.2E-01      | 6.4E-01      | 4.2E-01      | 5.1E-01      | 5.2E-01      | 2.5E-01      | 1.7E-01      | 0.0E+00      | 7.0E-03      | 3.5E-01      | -1.4E+00     | -2.6E-01     |
| 1.3E+01      | 1.1E+01      | 1.6E+01      | 8.0E+01      | 2.1E+01      | 1.1E+01      | 8.2E+00      | 1.9E+01      | 4.8E+01      | 7.9E+01      | 3.0E+01      | 1.2E+01      |

| Specific_Low |
|--------------|--------------|--------------|--------------|--------------|--------------|--------------|--------------|--------------|--------------|--------------|--------------|
| At_F0110     | At_F0258     | At_F0370     | At_F0596     | At_F0003     | At_F0010     | At_F0048     | At_F0095     | At_F0139     | At_F0168     | At_F0617     | At_F0129     |
| -            | -            | -            | -            | -            | -            | -            | bm           | -            | -            | -            | -            |
| 3.9E-03      | 5.6E-03      | 1.5E-02      | 0.0E+00      | 4.0E-03      | 6.5E-03      | 4.4E-03      | 4.3E-03      | 3.5E-03      | 8.2E-03      | 4.2E-03      | 3.6E-03      |
| 5.0E-03      | 2.0E-03      | 1.2E-02      | 0.0E+00      | 2.6E-03      | 6.6E-03      | 4.4E-03      | 9.9E-03      | 9.9E-03      | 7.2E-03      | 1.9E-03      | 1.9E-03      |
| 3.0E-03      | 1.5E-03      | 7.3E-03      | 3.0E-03      | 1.8E-03      | 7.9E-04      | 5.8E-03      | 1.3E-02      | 8.9E-03      | 1.1E-02      | 5.7E-03      | 7.1E-03      |
| 6.5E-02      | 1.1E-01      | 1.1E-01      | 0.0E+00      | 3.9E-02      | 1.0E-01      | 7.2E-02      | 6.6E-02      | 3.2E-02      | 1.9E-01      | 1.0E-01      | 6.1E-02      |
| 4.8E-02      | 2.6E-02      | 7.6E-02      | 0.0E+00      | 4.3E-02      | 9.4E-02      | 5.0E-02      | 7.5E-02      | 5.3E-02      | 1.5E-01      | 4.5E-02      | 5.0E-02      |
| 4.9E-02      | 3.0E-02      | 8.5E-02      | 3.2E-02      | 3.5E-02      | 5.4E-02      | 9.6E-02      | 1.2E-01      | 4.2E-02      | 2.3E-01      | 1.1E-01      | 5.3E-02      |
| 0.0E+00      | 0.0E+00      | 0.0E+00      | 0.0E+00      | 2.7E+00      | 4.4E+01      | 2.5E+00      | 2.4E+01      | 3.2E+01      | 5.0E+01      | 1.2E+00      | 4.2E+00      |
| 0            | 0            | 0            | 0            | 0            | 68           | 0            | 5            | 31           | 83           | 2            | 3            |
| 0            | 0            | 1            | 0            | 1            | 4            | 0            | 1            | 4            | 8            | 1            | 0            |
| 0            | 0            | 67           | 0            | 0            | 0            | 0            | 17           | 0            | 100          | 0            | 0            |
| 0            | 0            | 29           | 0            | 10           | 0            | 0            | 0            | 0            | 100          | 7            | 10           |
| 0            | 0            | 0            | 0            | 0            | 0            | 0            | 0            | 0            | 0            | 0            | 17           |
| 0            | 0            | 0            | 0            | 0            | 0            | 0            | 0            | 0            | 0            | 0            | 0            |
| 0            | 0            | 0            | 0            | 0            | 0            | 0            | 0            | 0            | 100          | 0            | 0            |
| 0            | 0            | 0            | 0            | 7            | 80           | 0            | 0            | 20           | 100          | 0            | 0            |
| 0            | 0            | 0            | 0            | 7            | 47           | 0            | 0            | 58           | 64           | 0            | 0            |
| 0            | 0            | 0            | 0            | 0            | 33           | 0            | 40           | 23           | 22           | 4            | 14           |
| 0            | 0            | 0            | 0            | 0            | 44           | 0            | 43           | 47           | 47           | 0            | 9            |
| 0            | 0            | 0            | 0            | 0            | 88           | 20           | 86           | 13           | 100          | 0            | 0            |
| 0            | 0            | 0            | 0            | 0            | 0            | 0            | 33           | 0            | 100          | 0            | 0            |
| 0            | 0            | 0            | 0            | 0            | 0            | 0            | 0            | 10           | 17           | 14           | 0            |
| 0            | 0            | 0            | 0            | 0            | 0            | 0            | 0            | 21           | 8            | 0            | 0            |
| 0            | 0            | 0            | 38           | 0            | 0            | 29           | 0            | 31           | 75           | 11           | 0            |
| 0            | 0            | 0            | 50           | 0            | 0            | 0            | 0            | 83           | 100          | 0            | 0            |
| 0            | 0            | 0            | 0            | 0            | 0            | 0            | 0            | 0            | 50           | 20           | 0            |
| 0            | 0            | 0            | 0            | 0            | 0            | 0            | 0            | 0            | 0            | 0            | 0            |
| 0            | 0            | 0            | 0            | 0            | 0            | 0            | 0            | 0            | 0            | 0            | 6            |
| 0            | 0            | 0            | 0            | 0            | 0            | 0            | 0            | 0            | 0            | 0            | 0            |
| 0            | 0            | 0            | 0            | 0            | 0            | 0            | 0            | 0            | 67           | 0            | 0            |
| 0            | 0            | 0            | 0            | 0            | 50           | 0            | 0            | 0            | 82           | 0            | 0            |
| 0            | 0            | 0            | 0            | 0            | 38           | 0            | 0            | 21           | 58           | 8            | 0            |
| 0            | 0            | 0            | 0            | 0            | 38           | 0            | 7            | 29           | 18           | 0            | 5            |
| 0            | 0            | 0            | 0            | 0            | 22           | 0            | 9            | 0            | 35           | 0            | 0            |
| 0            | 0            | 0            | 0            | 0            | 60           | 0            | 0            | 0            | 86           | 0            | 0            |
| 0            | 0            | 0            | 0            | 0            | 0            | 0            | 0            | 0            | 0            | 0            | 0            |
| 0            | 0            | 0            | 0            | 0            | 0            | 0            | 0            | 0            | 0            | 14           | 0            |
| 0            | 0            | 0            | 0            | 0            | 0            | 0            | 0            | 0            | 6            | 17           | 0            |
| 0            | 0            | 0            | 7            | 0            | 0            | 0            | 0            | 0            | 27           | 0            | 0            |
| 0            | 0            | 0            | 22           | 0            | 0            | 0            | 0            | 0            | 50           | 0            | 0            |
| 0            | 0            | 0            | 0            | 2            | 0            | 0            | 0            | 0            | 0            | 3            | 0            |
| 0            | 0            | 0            | 0            | 0            | 0            | 0            | 0            | 0            | 0            | 0            | 0            |
| 0            | 0            | 0            | 0            | 0            | 0            | 1            | 0            | 0            | 0            | 1            | 0            |
| 0            | 0            | 0            | 0            | 0            | 0            | 0            | 0            | 0            | 0            | 0            | 0            |
| 0            | 0            | 0            | 0            | 0            | 0            | 0            | 0            | 4            | 4            | 0            | 0            |
| 0            | 0            | 4            | 0            | 0            | 0            | 0            | 0            | 0            | 7            | 0            | 0            |
| 0            | 0            | 0            | 0            | 1            | 6            | 0            | 0            | 0            | 3            | 1            | 0            |
| 0            | 0            | 0            | 0            | 0            | 0            | 0            | 4            | 6            | 3            | 1            | 0            |
| 0            | 0            | 0            | 0            | 0            | 3            | 0            | 0            | 0            | 2            | 0            | 0            |
| 0            | 0            | 0            | 0            | 0            | 0            | 0            | 0            | 0            | 3            | 0            | 0            |
| 0            | 0            | 0            | 0            | 0            | 0            | 0            | 0            | 0            | 4            | 0            | 5            |
| 2            | 0            | 0            | 0            | 0            | 0            | 0            | 0            | 0            | 0            | 0            | 0            |
| 0            | 0            | 0            | 0            | 0            | 0            | 0            | 0            | 0            | 0            | 5            | 0            |
| 0            | 0            | 0            | 2            | 0            | 1            | 0            | 0            | 0            | 0            | 12           | 0            |
| 0            | 0            | 0            | 0            | 0            | 0            | 0            | 0            | 0            | 6            | 0            | 0            |
| 1.0E+00      | 6.6E-02      | 4.4E-01      | 0.0E+00      | 2.5E-01      | 9.9E-02      | 1.4E+00      | 5.1E-01      | 1.0E-01      | 3.0E-01      | 4.2E-01      | 1.1E-01      |
| 3.5E-01      | 1.2E-01      | 3.0E-01      | 9.7E-02      | 2.5E-01      | 7.7E-02      | 6.9E-02      | 1.7E-01      | 2.4E-01      | 1.4E-01      | 6.0E-02      | 2.1E-01      |
| 4            | 2            | 2            | 2            | 2            | 0            | 2            | 2            | 0            | 2            | 3            | 2            |
| 2.7E-01      | -8.9E-01     | 8.6E-02      | 0.0E+00      | 1.3E-01      | 0.0E+00      | -1.7E+00     | 6.4E-01      | 0.0E+00      | -1.9E-01     | -9.2E-01     | -5.6E-01     |
| 5.7E+00      | 1.2E+01      | 1.3E+01      | 5.8E+02      | 5.4E+00      | 3.3E+00      | 2.1E+01      | 6.1E+00      | 4.8E+00      | 5.7E+00      | 9.9E+00      | 2.8E+00      |

| Specific_Low |
|--------------|--------------|--------------|--------------|--------------|--------------|--------------|--------------|--------------|--------------|--------------|--------------|
| At_F0314     | At_F0386     | At_F0461     | At_F0189     | At_F0456     | At_F0648     | At_F0103     | At_F0268     | At_F0387     | At_F0073     | At_F0201     | At_F0408     |
| -            | -            | -            | -            | -            | -            | -            | -            | -            | -            | -            | -            |
| 6.6E-03      | 4.1E-03      | 1.8E-03      | 4.0E-03      | 3.8E-03      | 5.9E-03      | 4.0E-03      | 9.0E-03      | 1.0E-02      | 9.0E-03      | 6.5E-03      | 9.0E-03      |
| 4.1E-03      | 4.2E-03      | 5.4E-04      | 3.4E-03      | 2.0E-03      | 6.4E-03      | 5.1E-03      | 8.8E-03      | 1.0E-02      | 4.6E-03      | 3.5E-03      | 1.6E-02      |
| 4.3E-03      | 4.4E-03      | 1.2E-03      | 3.9E-03      | 1.2E-03      | 7.9E-03      | 4.3E-03      | 8.3E-03      | 1.4E-02      | 6.6E-03      | 2.6E-03      | 1.4E-02      |
| 5.8E-02      | 8.9E-02      | 4.3E-02      | 6.7E-02      | 5.0E-02      | 8.5E-02      | 4.2E-02      | 8.7E-02      | 1.4E-01      | 6.8E-02      | 5.0E-02      | 9.8E-02      |
| 3.7E-02      | 1.0E-01      | 8.1E-03      | 6.0E-02      | 3.6E-02      | 7.6E-02      | 4.2E-02      | 9.6E-02      | 1.1E-01      | 5.0E-02      | 4.7E-02      | 1.0E-01      |
| 4.0E-02      | 1.1E-01      | 3.5E-02      | 7.8E-02      | 2.2E-02      | 9.1E-02      | 8.3E-02      | 1.2E-01      | 1.1E-01      | 7.6E-02      | 3.9E-02      | 1.6E-01      |
| 0.0E+00      | 4.3E+00      | 0.0E+00      | 0.0E+00      | 1.1E+00      | 3.4E+00      | 9.8E-01      | 5.4E+00      | 2.3E+01      | 0.0E+00      | 1.4E+00      | 1.3E+01      |
| 0            | 0            | 0            | 0            | 0            | 0            | 0            | 0            | 19           | 0            | 0            | 4            |
| 1            | 1            | 0            | 1            | 1            | 0            | 0            | 0            | 3            | 1            | 0            | 0            |
| 0            | 0            | 0            | 50           | 0            | 0            | 0            | 0            | 100          | 0            | 0            | 0            |
| 0            | 0            | 0            | 62           | 0            | 0            | 0            | 0            | 0            | 0            | 13           | 0            |
| 0            | 40           | 0            | 0            | 11           | 0            | 5            | 0            | 22           | 0            | 0            | 14           |
| 0            | 0            | 0            | 0            | 0            | 0            | 0            | 0            | 0            | 0            | 0            | 18           |
| 0            | 0            | 0            | 0            | 0            | 8            | 0            | 0            | 0            | 0            | 0            | 83           |
| 0            | 0            | 0            | 0            | 0            | 8            | 0            | 0            | 33           | 0            | 0            | 0            |
| 0            | 0            | 0            | 0            | 0            | 0            | 0            | 29           | 9            | 0            | 0            | 0            |
| 0            | 0            | 0            | 0            | 4            | 0            | 0            | 8            | 35           | 0            | 0            | 13           |
| 0            | 0            | 0            | 0            | 0            | 9            | 6            | 0            | 27           | 0            | 0            | 17           |
| 0            | 33           | 0            | 0            | 0            | 0            | 0            | 0            | 33           | 0            | 11           | 83           |
| 0            | 0            | 11           | 0            | 0            | 0            | 0            | 0            | 25           | 0            | 0            | 0            |
| 0            | 0            | 0            | 0            | 0            | 0            | 20           | 0            | 0            | 0            | 0            | 0            |
| 0            | 0            | 0            | 0            | 0            | 0            | 80           | 0            | 0            | 0            | 0            | 44           |
| 50           | 0            | 0            | 0            | 0            | 0            | 50           | 0            | 0            | 0            | 0            | 60           |
| 0            | 0            | 0            | 0            | 0            | 0            | 0            | 100          | 33           | 0            | 0            | 100          |
| 0            | 0            | 0            | 0            | 0            | 0            | 0            | 0            | 0            | 0            | 14           | 0            |
| 0            | 0            | 0            | 50           | 0            | 0            | 0            | 0            | 0            | 0            | 0            | 0            |
| 0            | 22           | 0            | 0            | 0            | 0            | 0            | 0            | 0            | 0            | 0            | 0            |
| 0            | 8            | 0            | 0            | 0            | 0            | 0            | 0            | 0            | 0            | 0            | 0            |
| 0            | 0            | 0            | 0            | 0            | 0            | 0            | 0            | 0            | 0            | 0            | 33           |
| 0            | 0            | 0            | 0            | 0            | 0            | 0            | 0            | 0            | 0            | 0            | 0            |
| 0            | 0            | 0            | 0            | 0            | 0            | 0            | 0            | 14           | 0            | 0            | 0            |
| 0            | 0            | 0            | 0            | 0            | 0            | 0            | 0            | 19           | 0            | 0            | 0            |
| 0            | 4            | 0            | 0            | 0            | 0            | 0            | 0            | 0            | 0            | 0            | 0            |
| 0            | 0            | 0            | 0            | 0            | 0            | 0            | 0            | 0            | 0            | 0            | 33           |
| 0            | 0            | 0            | 0            | 0            | 0            | 0            | 0            | 0            | 0            | 0            | 0            |
| 0            | 0            | 0            | 0            | 0            | 0            | 43           | 0            | 0            | 0            | 0            | 21           |
| 100          | 20           | 0            | 0            | 0            | 0            | 100          | 0            | 0            | 0            | 0            | 42           |
| 0            | 0            | 0            | 0            | 0            | 0            | 0            | 0            | 0            | 0            | 0            | 100          |
| 0            | 0            | 0            | 0            | 0            | 0            | 0            | 0            | 6            | 4            | 0            | 0            |
| 0            | 0            | 0            | 2            | 0            | 0            | 0            | 0            | 0            | 0            | 0            | 0            |
| 1            | 3            | 0            | 0            | 0            | 0            | 0            | 0            | 0            | 0            | 0            | 0            |
| 0            | 0            | 0            | 0            | 2            | 0            | 0            | 0            | 0            | 0            | 0            | 0            |
| 0            | 8            | 0            | 0            | 0            | 0            | 0            | 0            | 0            | 0            | 0            | 0            |
| 0            | 0            | 0            | 0            | 0            | 0            | 0            | 0            | 0            | 2            | 0            | 0            |
| 0            | 0            | 0            | 0            | 2            | 0            | 0            | 0            | 0            | 0            | 0            | 0            |
| 1            | 0            | 2            | 0            | 0            | 0            | 0            | 0            | 5            | 0            | 0            | 0            |
| 0            | 2            | 0            | 3            | 0            | 0            | 0            | 0            | 0            | 0            | 0            | 0            |
| 0            | 0            | 0            | 0            | 0            | 0            | 0            | 0            | 0            | 0            | 0            | 0            |
| 0            | 0            | 0            | 0            | 0            | 0            | 0            | 0            | 7            | 0            | 0            | 0            |
| 0            | 0            | 0            | 0            | 0            | 2            | 0            | 0            | 0            | 0            | 0            | 0            |
| 0            | 0            | 0            | 0            | 0            | 0            | 18           | 0            | 0            | 0            | 0            | 1            |
| 0            | 0            | 0            | 0            | 0            | 0            | 20           | 0            | 0            | 0            | 0            | 4            |
| 0            | 0            | 0            | 0            | 0            | 0            | 0            | 0            | 0            | 0            | 0            | 7            |
| 8.5E-02      | 3.0E-01      | 1.3E-01      | 8.3E-02      | 9.8E-02      | 5.7E-01      | 7.1E-01      | 2.4E+00      | 3.1E-01      | 5.0E-01      | 7.4E-02      | 4.1E-01      |
| 4.2E-01      | 3.9E-01      | 4.1E-01      | 2.7E-01      | 1.4E-01      | 1.1E-01      | 3.3E-01      | 2.7E-01      | 2.0E-01      | 1.9E-01      | 3.3E-01      | 1.8E-01      |
| 2            | 3            | 0            | 2            | 2            | 1            | 3            | 1            | 2            | 2            | 1            | 2            |
| -7.9E-01     | -1.7E+00     | 0.0E+00      | 6.9E-01      | 2.7E-01      | 0.0E+00      | -2.9E-01     | 0.0E+00      | -1.2E+00     | 5.8E-01      | 0.0E+00      | 6.9E-02      |
| 1.4E+01      | 1.5E+01      | 9.3E+00      | 1.3E+01      | 2.6E+00      | 3.4E+00      | 8.1E+00      | 4.0E+00      | 2.9E+00      | 4.0E+00      | 1.2E+01      | 2.4E+01      |

| Specific_Low |
|--------------|--------------|--------------|--------------|--------------|--------------|--------------|--------------|--------------|--------------|--------------|--------------|
| At_F0543     | At_F0697     | At_F0434     | At_F0423     | At_F0453     | At_F0018     | At_F0142     | At_F0008     | At_F0208     | At_F0219     | At_F0040     | At_F0195     |
| -            | -            | -            | -            | -            | -            | -            | -            | -            | -            | -            | -            |
| 1.3E-03      | 6.0E-03      | 3.7E-03      | 5.5E-03      | 5.7E-03      | 1.8E-03      | 9.0E-03      | 2.2E-03      | 1.4E-02      | 5.5E-03      | 5.7E-03      | 7.3E-04      |
| 3.0E-03      | 7.7E-03      | 2.3E-03      | 4.6E-03      | 9.2E-03      | 5.8E-03      | 1.4E-02      | 3.0E-03      | 8.7E-03      | 5.0E-03      | 2.5E-04      | 1.0E-03      |
| 4.3E-03      | 1.1E-02      | 2.3E-03      | 2.3E-03      | 1.0E-02      | 7.5E-03      | 6.6E-03      | 2.2E-03      | 2.4E-03      | 6.7E-03      | 3.3E-03      | 1.8E-03      |
| 4.5E-02      | 5.5E-02      | 5.4E-02      | 1.2E-01      | 9.6E-02      | 4.2E-02      | 9.6E-02      | 7.1E-02      | 7.1E-02      | 7.1E-02      | 8.4E-02      | 2.5E-02      |
| 8.6E-02      | 6.5E-02      | 4.0E-02      | 5.3E-02      | 7.1E-02      | 6.5E-02      | 1.3E-01      | 6.9E-02      | 5.4E-02      | 6.1E-02      | 2.4E-02      | 3.5E-02      |
| 7.7E-02      | 1.3E-01      | 4.1E-02      | 3.7E-02      | 8.4E-02      | 8.6E-02      | 6.3E-02      | 6.1E-02      | 2.7E-02      | 7.1E-02      | 7.2E-02      | 3.7E-02      |
| 4.9E+01      | 0.0E+00      | 0.0E+00      | 2.0E+00      | 1.0E+01      | 8.1E+00      | 6.8E+00      | 0.0E+00      | 1.8E+00      | 2.0E+00      | 0.0E+00      | 1.3E+00      |
| 88           | 0            | 0            | 0            | 0            | 0            | 0            | 0            | 0            | 0            | 0            | 0            |
| 17           | 0            | 1            | 1            | 0            | 0            | 1            | 0            | 0            | 0            | 0            | 0            |
| 0            | 0            | 0            | 11           | 100          | 0            | 0            | 0            | 0            | 0            | 0            | 0            |
| 0            | 0            | 0            | 0            | 14           | 0            | 0            | 0            | 0            | 0            | 0            | 0            |
| 0            | 0            | 0            | 0            | 0            | 0            | 0            | 0            | 0            | 0            | 0            | 5            |
| 0            | 0            | 0            | 0            | 10           | 38           | 0            | 0            | 0            | 0            | 86           | 0            |
| 0            | 0            | 0            | 11           | 0            | 67           | 0            | 0            | 0            | 0            | 0            | 0            |
| 100          | 0            | 0            | 0            | 45           | 0            | 33           | 0            | 0            | 15           | 0            | 0            |
| 55           | 0            | 0            | 6            | 0            | 0            | 0            | 0            | 0            | 0            | 0            | 0            |
| 22           | 0            | 0            | 0            | 0            | 0            | 0            | 0            | 6            | 0            | 0            | 4            |
| 44           | 0            | 0            | 0            | 0            | 38           | 15           | 0            | 0            | 0            | 0            | 0            |
| 100          | 0            | 0            | 10           | 0            | 50           | 0            | 0            | 0            | 0            | 0            | 0            |
| 100          | 0            | 0            | 0            | 0            | 0            | 25           | 0            | 0            | 0            | 0            | 0            |
| 63           | 0            | 0            | 0            | 0            | 0            | 0            | 0            | 0            | 0            | 0            | 0            |
| 57           | 9            | 0            | 7            | 0            | 0            | 0            | 0            | 0            | 0            | 0            | 0            |
| 25           | 24           | 0            | 36           | 0            | 29           | 0            | 0            | 0            | 0            | 0            | 0            |
| 0            | 42           | 0            | 0            | 0            | 100          | 0            | 10           | 0            | 0            | 44           | 0            |
| 0            | 0            | 0            | 0            | 60           | 0            | 0            | 0            | 0            | 0            | 0            | 0            |
| 0            | 0            | 0            | 0            | 0            | 0            | 0            | 0            | 0            | 0            | 0            | 0            |
| 0            | 0            | 0            | 0            | 0            | 0            | 0            | 0            | 0            | 0            | 17           | 0            |
| 0            | 0            | 0            | 0            | 0            | 0            | 0            | 0            | 0            | 0            | 0            | 0            |
| 100          | 0            | 0            | 0            | 0            | 0            | 0            | 0            | 0            | 0            | 0            | 0            |
| 33           | 0            | 0            | 0            | 0            | 0            | 0            | 0            | 0            | 0            | 0            | 0            |
| 40           | 0            | 0            | 0            | 0            | 0            | 0            | 0            | 0            | 0            | 0            | 0            |
| 36           | 0            | 0            | 0            | 0            | 0            | 0            | 0            | 0            | 0            | 0            | 0            |
| 71           | 0            | 0            | 0            | 0            | 0            | 0            | 0            | 0            | 0            | 0            | 0            |
| 67           | 0            | 0            | 0            | 0            | 25           | 0            | 0            | 0            | 0            | 0            | 0            |
| 0            | 0            | 0            | 0            | 0            | 0            | 0            | 0            | 0            | 0            | 0            | 0            |
| 28           | 6            | 0            | 0            | 0            | 0            | 0            | 0            | 0            | 0            | 0            | 0            |
| 33           | 8            | 0            | 0            | 0            | 29           | 0            | 0            | 0            | 0            | 0            | 0            |
| 0            | 38           | 0            | 0            | 0            | 60           | 0            | 0            | 0            | 0            | 50           | 0            |
| 0            | 0            | 0            | 0            | 4            | 0            | 0            | 0            | 0            | 0            | 0            | 0            |
| 0            | 0            | 0            | 2            | 0            | 0            | 0            | 0            | 0            | 0            | 0            | 0            |
| 3            | 0            | 0            | 0            | 0            | 0            | 0            | 0            | 0            | 0            | 0            | 0            |
| 0            | 0            | 0            | 0            | 0            | 0            | 0            | 0            | 0            | 0            | 6            | 0            |
| 8            | 0            | 0            | 0            | 0            | 0            | 4            | 0            | 0            | 0            | 3            | 0            |
| 30           | 0            | 0            | 0            | 0            | 0            | 0            | 0            | 0            | 0            | 0            | 0            |
| 12           | 0            | 1            | 0            | 0            | 0            | 0            | 0            | 0            | 0            | 0            | 0            |
| 3            | 0            | 0            | 1            | 0            | 0            | 0            | 0            | 0            | 0            | 0            | 0            |
| 4            | 0            | 0            | 0            | 0            | 0            | 0            | 0            | 0            | 0            | 0            | 0            |
| 10           | 0            | 3            | 0            | 0            | 0            | 3            | 0            | 0            | 0            | 0            | 0            |
| 0            | 0            | 0            | 0            | 0            | 0            | 0            | 0            | 4            | 0            | 0            | 0            |
| 2            | 0            | 0            | 0            | 0            | 0            | 0            | 0            | 0            | 0            | 0            | 0            |
| 1            | 8            | 0            | 0            | 0            | 0            | 0            | 0            | 0            | 0            | 0            | 0            |
| 0            | 9            | 0            | 0            | 0            | 0            | 0            | 0            | 0            | 0            | 0            | 0            |
| 0            | 22           | 0            | 0            | 0            | 23           | 30           | 0            | 0            | 0            | 25           | 0            |
| 5.6E-01      | 2.0E-01      | 3.5E-02      | 4.3E-01      | 4.0E-01      | 2.0E+00      | 2.2E-01      | 4.9E-01      | 2.4E-01      | 1.1E+00      | 6.2E-01      | 8.9E-02      |
| 1.4E-01      | 1.1E-01      | 1.9E-01      | 1.0E-01      | 3.1E-01      | 1.2E-01      | 2.7E-01      | 4.4E-02      | 1.5E-01      | 1.7E-01      | 3.8E-01      | 2.0E-01      |
| 0            | 2            | 2            | 3            | 0            | 2            | 2            | 1            | 4            | 2            | 2            | 2            |
| 0.0E+00      | -1.1E+00     | 2.4E-01      | 2.6E-01      | 0.0E+00      | -6.0E-01     | 4.8E-01      | 0.0E+00      | 0.0E+00      | 4.3E-01      | 1.0E+00      | 6.7E-01      |
| 4.2E+00      | 2.0E+00      | 7.3E+00      | 9.9E+00      | 1.8E+01      | 1.4E+01      | 8.2E+00      | 3.5E+00      | 8.6E+00      | 5.7E+00      | 9.8E+00      | 6.1E+00      |

| Specific_Low |
|--------------|--------------|--------------|--------------|--------------|--------------|--------------|--------------|--------------|--------------|--------------|--------------|
| At_F0224     | At_F0241     | At_F0277     | At_F0384     | At_F0391     | At_F0424     | At_F0498     | At_F0499     | At_F0566     | At_F0650     | At_F0652     | At_F0686     |
| -            | -            | bm           | -            | -            | -            | -            | -            | -            | -            | -            | -            |
| 9.5E-04      | 1.3E-03      | 1.5E-03      | 2.5E-03      | 7.5E-03      | 7.2E-04      | 2.4E-03      | 5.9E-03      | 5.6E-03      | 8.2E-04      | 4.9E-03      | 2.7E-03      |
| 1.1E-03      | 1.0E-03      | 3.3E-03      | 1.4E-03      | 2.4E-03      | 2.1E-03      | 3.7E-03      | 3.2E-03      | 4.5E-03      | 1.0E-03      | 4.5E-03      | 1.6E-03      |
| 5.2E-03      | 2.0E-03      | 4.1E-03      | 2.0E-03      | 7.8E-03      | 4.3E-03      | 3.9E-03      | 2.7E-03      | 7.9E-03      | 7.0E-03      | 1.0E-02      | 1.7E-03      |
| 3.5E-02      | 3.2E-02      | 2.8E-02      | 4.7E-02      | 5.6E-02      | 3.9E-02      | 4.9E-02      | 1.3E-01      | 6.3E-02      | 3.5E-02      | 7.9E-02      | 5.4E-02      |
| 2.8E-02      | 3.2E-02      | 4.2E-02      | 4.2E-02      | 2.0E-02      | 5.1E-02      | 3.7E-02      | 8.7E-02      | 6.2E-02      | 3.1E-02      | 4.4E-02      | 3.0E-02      |
| 5.8E-02      | 4.6E-02      | 3.0E-02      | 3.6E-02      | 5.2E-02      | 9.9E-02      | 7.2E-02      | 4.3E-02      | 8.5E-02      | 1.2E-01      | 5.2E-02      | 4.3E-02      |
| 6.0E+00      | 1.0E+00      | 2.9E+01      | 2.3E+00      | 1.1E+01      | 0.0E+00      | 3.2E+00      | 0.0E+00      | 0.0E+00      | 0.0E+00      | 1.3E+01      | 0.0E+00      |
| 3            | 0            | 0            | 0            | 0            | 0            | 0            | 0            | 0            | 0            | 2            | 0            |
| 0            | 0            | 1            | 1            | 0            | 0            | 0            | 1            | 0            | 0            | 0            | 0            |
| 0            | 0            | 0            | 0            | 0            | 0            | 0            | 0            | 0            | 0            | 0            | 0            |
| 0            | 0            | 0            | 0            | 0            | 0            | 0            | 0            | 0            | 0            | 0            | 0            |
| 0            | 0            | 0            | 0            | 18           | 0            | 0            | 0            | 0            | 0            | 14           | 0            |
| 0            | 8            | 0            | 0            | 7            | 0            | 0            | 0            | 0            | 0            | 0            | 0            |
| 0            | 0            | 0            | 33           | 43           | 0            | 0            | 0            | 0            | 0            | 0            | 0            |
| 0            | 0            | 0            | 0            | 0            | 0            | 0            | 0            | 0            | 0            | 0            | 0            |
| 0            | 0            | 32           | 0            | 17           | 0            | 0            | 0            | 0            | 0            | 18           | 0            |
| 0            | 0            | 28           | 8            | 16           | 0            | 0            | 0            | 0            | 0            | 12           | 0            |
| 27           | 8            | 25           | 0            | 0            | 0            | 14           | 0            | 0            | 0            | 17           | 0            |
| 0            | 0            | 70           | 0            | 44           | 0            | 0            | 0            | 0            | 0            | 0            | 0            |
| 0            | 0            | 0            | 0            | 0            | 0            | 0            | 0            | 0            | 0            | 0            | 0            |
| 0            | 0            | 0            | 0            | 0            | 0            | 0            | 0            | 0            | 33           | 0            | 0            |
| 0            | 0            | 29           | 0            | 0            | 0            | 0            | 0            | 0            | 0            | 67           | 0            |
| 0            | 0            | 10           | 0            | 0            | 29           | 0            | 0            | 0            | 50           | 0            | 0            |
| 0            | 0            | 80           | 0            | 0            | 100          | 0            | 0            | 0            | 0            | 0            | 0            |
| 0            | 0            | 0            | 0            | 0            | 0            | 0            | 0            | 0            | 0            | 0            | 0            |
| 0            | 0            | 0            | 0            | 0            | 0            | 0            | 0            | 0            | 0            | 0            | 0            |
| 0            | 0            | 0            | 0            | 0            | 0            | 0            | 0            | 0            | 0            | 0            | 0            |
| 0            | 0            | 0            | 0            | 0            | 0            | 0            | 0            | 0            | 0            | 0            | 0            |
| 14           | 0            | 0            | 0            | 0            | 0            | 0            | 0            | 0            | 0            | 0            | 0            |
| 0            | 0            | 0            | 0            | 0            | 0            | 2            | 0            | 0            | 0            | 0            | 0            |
| 0            | 0            | 0            | 0            | 0            | 0            | 0            | 0            | 0            | 0            | 0            | 0            |
| 0            | 0            | 0            | 0            | 0            | 0            | 0            | 0            | 0            | 0            | 0            | 0            |
| 0            | 0            | 0            | 0            | 0            | 0            | 0            | 0            | 0            | 0            | 0            | 0            |
| 0            | 0            | 0            | 0            | 0            | 0            | 0            | 0            | 0            | 0            | 8            | 0            |
| 0            | 0            | 0            | 0            | 0            | 0            | 0            | 0            | 0            | 0            | 0            | 0            |
| 0            | 0            | 0            | 0            | 0            | 0            | 0            | 0            | 0            | 0            | 0            | 0            |
| 0            | 0            | 0            | 0            | 0            | 0            | 0            | 0            | 0            | 0            | 0            | 0            |
| 0            | 0            | 0            | 0            | 0            | 0            | 0            | 0            | 0            | 13           | 0            | 0            |
| 0            | 0            | 0            | 0            | 0            | 0            | 0            | 0            | 0            | 0            | 0            | 0            |
| 0            | 0            | 0            | 0            | 0            | 0            | 0            | 0            | 0            | 0            | 0            | 0            |
| 0            | 0            | 0            | 0            | 0            | 0            | 0            | 0            | 0            | 0            | 0            | 0            |
| 0            | 0            | 0            | 0            | 0            | 0            | 0            | 0            | 0            | 0            | 0            | 0            |
| 0            | 0            | 0            | 2            | 0            | 0            | 0            | 11           | 0            | 0            | 0            | 0            |
| 0            | 0            | 0            | 0            | 0            | 0            | 0            | 0            | 0            | 0            | 0            | 0            |
| 0            | 0            | 0            | 0            | 0            | 0            | 0            | 3            | 0            | 0            | 0            | 0            |
| 0            | 0            | 3            | 0            | 0            | 0            | 0            | 0            | 0            | 0            | 0            | 0            |
| 0            | 0            | 0            | 1            | 0            | 0            | 0            | 0            | 0            | 0            | 0            | 0            |
| 0            | 0            | 0            | 0            | 0            | 0            | 1            | 0            | 0            | 0            | 1            | 0            |
| 0            | 0            | 0            | 0            | 0            | 0            | 0            | 0            | 0            | 0            | 0            | 0            |
| 0            | 0            | 0            | 0            | 0            | 0            | 0            | 0            | 0            | 0            | 0            | 0            |
| 2            | 0            | 0            | 2            | 0            | 3            | 0            | 0            | 0            | 0            | 0            | 0            |
| 0            | 0            | 0            | 0            | 0            | 0            | 0            | 0            | 0            | 0            | 1            | 0            |
| 0            | 0            | 0            | 0            | 0            | 7            | 0            | 0            | 0            | 0            | 0            | 0            |
| 0            | 0            | 0            | 4            | 0            | 35           | 0            | 4            | 0            | 0            | 0            | 0            |
| 6.6E-02      | 3.0E-01      | 7.3E-02      | 1.0E-01      | 1.2E-01      | 1.0E-01      | 2.4E+00      | 3.4E-01      | 8.0E-02      | 8.9E-02      | 1.4E-01      | 9.2E-02      |
| 6.2E-01      | 2.4E-01      | 2.1E-01      | 1.2E-01      | 4.8E-01      | 4.2E-01      | 3.3E-01      | 1.4E-01      | 1.4E+00      | 6.7E-01      | 2.5E-01      | 9.0E-01      |
| 2            | 2            | 3            | 3            | 2            | 0            | 2            | 0            | 0            | 2            | 2            | 2            |
| -3.4E+00     | 6.4E-01      | -9.4E-01     | 8.4E-01      | -1.4E-01     | 0.0E+00      | 7.1E-01      | 0.0E+00      | 0.0E+00      | 1.0E+00      | 3.1E-01      | -6.1E-01     |
| 1.7E+01      | 1.8E+01      | 4.4E+01      | 1.6E+01      | 6.9E+01      | 7.6E+00      | 2.5E+01      | 1.3E+01      | 6.7E+00      | 5.0E+01      | 3.5E+00      | 1.8E+01      |

| Specific_Low |
|--------------|--------------|--------------|--------------|--------------|--------------|--------------|--------------|--------------|--------------|--------------|--------------|
| At_F0702     | At_F0316     | At_F0326     | At_F0361     | At_F0502     | At_F0651     | Atpeg0074    | At_F0123     | At_F0179     | At_F0646     | At_F0187     | At_F0431     |
| -            | -            | bm           | -            | -            | -            | NA           | -            | -            | -            | -            | -            |
| 9.3E-03      | 3.5E-03      | 1.7E-02      | 3.8E-03      | 3.9E-03      | 6.1E-03      | 5.9E-03      | 7.5E-03      | 1.8E-03      | 1.8E-02      | 2.4E-03      | 1.3E-03      |
| 4.3E-03      | 1.7E-03      | 3.9E-03      | 3.1E-03      | 2.6E-03      | 9.3E-03      | 4.2E-03      | 7.0E-03      | 9.6E-04      | 1.2E-02      | 4.2E-03      | 1.4E-03      |
| 3.0E-03      | 3.0E-03      | 2.8E-03      | 1.5E-03      | 3.7E-03      | 3.5E-03      | 6.2E-03      | 4.6E-03      | 2.4E-03      | 8.7E-03      | 2.9E-03      | 1.8E-03      |
| 1.1E-01      | 5.6E-02      | 2.3E-01      | 6.9E-02      | 5.0E-02      | 7.6E-02      | 7.1E-02      | 1.3E-01      | 4.6E-02      | 1.4E-01      | 3.2E-02      | 4.1E-02      |
| 4.5E-02      | 5.1E-02      | 7.0E-02      | 7.0E-02      | 3.6E-02      | 7.6E-02      | 5.7E-02      | 6.0E-02      | 3.7E-02      | 1.1E-01      | 4.6E-02      | 4.7E-02      |
| 5.4E-02      | 6.9E-02      | 4.7E-02      | 4.4E-02      | 5.5E-02      | 8.7E-02      | 6.5E-02      | 4.0E-02      | 4.0E-02      | 8.7E-02      | 4.3E-02      | 3.7E-02      |
| 4.3E+01      | 1.1E+01      | 2.2E+01      | 5.0E+00      | 8.3E+00      | 0.0E+00      | 1.2E+01      | 2.6E+00      | 7.1E+00      | 0.0E+00      | 0.0E+00      | 5.0E+00      |
| 75           | 3            | 0            | 9            | 0            | 0            | 0            | 0            | 0            | 4            | 0            | 0            |
| 16           | 1            | 0            | 0            | 1            | 0            | 0            | 0            | 0            | 0            | 1            | 0            |
| 0            | 0            | 0            | 0            | 0            | 0            | 0            | 0            | 0            | 0            | 0            | 0            |
| 0            | 0            | 44           | 0            | 0            | 0            | 0            | 0            | 0            | 0            | 0            | 0            |
| 7            | 0            | 60           | 0            | 0            | 0            | 0            | 0            | 0            | 0            | 0            | 0            |
| 0            | 0            | 17           | 0            | 0            | 0            | 0            | 0            | 0            | 0            | 0            | 0            |
| 83           | 0            | 0            | 0            | 0            | 0            | 0            | 50           | 0            | 0            | 0            | 0            |
| 53           | 0            | 0            | 0            | 0            | 0            | 0            | 0            | 0            | 0            | 0            | 0            |
| 50           | 11           | 0            | 0            | 0            | 0            | 0            | 0            | 0            | 0            | 0            | 0            |
| 53           | 29           | 10           | 10           | 0            | 0            | 0            | 0            | 10           | 0            | 0            | 0            |
| 63           | 0            | 41           | 23           | 44           | 0            | 28           | 0            | 0            | 0            | 0            | 26           |
| 100          | 0            | 25           | 0            | 14           | 0            | 67           | 33           | 25           | 0            | 0            | 0            |
| 67           | 0            | 0            | 0            | 0            | 0            | 20           | 0            | 0            | 0            | 60           | 0            |
| 39           | 0            | 0            | 0            | 0            | 0            | 0            | 33           | 0            | 0            | 23           | 0            |
| 40           | 0            | 14           | 0            | 0            | 0            | 0            | 0            | 0            | 0            | 0            | 0            |
| 33           | 0            | 46           | 0            | 0            | 0            | 0            | 53           | 0            | 0            | 0            | 0            |
| 83           | 0            | 57           | 0            | 0            | 11           | 0            | 43           | 0            | 0            | 0            | 0            |
| 0            | 0            | 0            | 0            | 0            | 0            | 0            | 0            | 0            | 0            | 0            | 0            |
| 0            | 0            | 30           | 0            | 0            | 0            | 0            | 0            | 0            | 0            | 0            | 0            |
| 6            | 0            | 27           | 0            | 0            | 0            | 0            | 0            | 0            | 0            | 0            | 0            |
| 10           | 0            | 0            | 0            | 0            | 0            | 0            | 0            | 0            | 0            | 0            | 0            |
| 67           | 0            | 0            | 0            | 0            | 0            | 0            | 0            | 0            | 0            | 0            | 0            |
| 33           | 0            | 0            | 0            | 0            | 0            | 0            | 0            | 0            | 0            | 0            | 0            |
| 50           | 0            | 0            | 0            | 0            | 0            | 0            | 0            | 0            | 8            | 0            | 0            |
| 33           | 5            | 0            | 5            | 0            | 0            | 0            | 0            | 0            | 0            | 0            | 0            |
| 40           | 0            | 0            | 19           | 0            | 0            | 8            | 0            | 0            | 0            | 0            | 0            |
| 100          | 0            | 0            | 0            | 0            | 0            | 0            | 0            | 0            | 0            | 0            | 0            |
| 100          | 0            | 0            | 0            | 0            | 0            | 0            | 0            | 0            | 0            | 0            | 0            |
| 16           | 0            | 0            | 0            | 0            | 0            | 0            | 0            | 0            | 0            | 0            | 0            |
| 29           | 0            | 0            | 0            | 0            | 0            | 0            | 0            | 0            | 0            | 0            | 0            |
| 21           | 0            | 0            | 0            | 0            | 0            | 0            | 0            | 0            | 0            | 0            | 0            |
| 73           | 0            | 0            | 0            | 0            | 0            | 0            | 0            | 0            | 0            | 0            | 0            |
| 0            | 0            | 0            | 0            | 0            | 0            | 0            | 0            | 0            | 0            | 0            | 0            |
| 0            | 0            | 3            | 0            | 0            | 0            | 0            | 0            | 0            | 0            | 0            | 0            |
| 1            | 0            | 6            | 0            | 0            | 0            | 0            | 0            | 0            | 0            | 0            | 0            |
| 1            | 0            | 25           | 0            | 0            | 0            | 0            | 0            | 0            | 0            | 0            | 0            |
| 20           | 0            | 0            | 0            | 5            | 0            | 0            | 0            | 0            | 0            | 0            | 0            |
| 12           | 2            | 0            | 0            | 0            | 0            | 0            | 0            | 0            | 0            | 0            | 0            |
| 11           | 1            | 2            | 0            | 0            | 0            | 0            | 0            | 0            | 0            | 0            | 0            |
| 6            | 0            | 0            | 0            | 0            | 0            | 0            | 0            | 0            | 0            | 0            | 0            |
| 16           | 0            | 0            | 0            | 3            | 0            | 0            | 0            | 0            | 0            | 2            | 0            |
| 14           | 0            | 0            | 0            | 0            | 0            | 0            | 0            | 0            | 0            | 0            | 0            |
| 6            | 0            | 0            | 0            | 0            | 0            | 0            | 0            | 0            | 0            | 0            | 0            |
| 7            | 0            | 0            | 0            | 0            | 0            | 0            | 0            | 0            | 0            | 0            | 0            |
| 3            | 0            | 0            | 0            | 0            | 0            | 0            | 0            | 0            | 0            | 2            | 0            |
| 3            | 0            | 0            | 0            | 0            | 0            | 0            | 0            | 0            | 0            | 0            | 0            |
| 15           | 0            | 0            | 0            | 0            | 0            | 0            | 0            | 0            | 0            | 0            | 0            |
| 5.6E-01      | 9.8E-02      | 8.1E-01      | 7.0E-02      | 7.8E-01      | 1.3E-01      | 9.4E-02      | 1.5E-01      | 1.3E-01      | 6.4E-01      | 8.7E-02      | 1.3E-01      |
| 4.3E-01      | 1.5E-01      | 4.3E-01      | 8.5E-02      | 1.6E-01      | 2.0E-01      | 2.5E-01      | 1.3E-01      | 3.0E-01      | 8.1E-02      | 4.3E-01      | 1.3E-01      |
| 0            | 2            | 0            | 2            | 2            | 2            | 2            | 2            | 2            | 0            | 3            | 2            |
| 0.0E+00      | -7.6E-01     | 0.0E+00      | -3.1E+00     | 6.6E-01      | -1.8E+00     | 4.3E-01      | 5.5E-01      | 6.5E-01      | 0.0E+00      | 0.0E+00      | 9.7E-01      |
| 3.6E+00      | 0.0E+00      |



| Specific_Low |
|--------------|--------------|--------------|--------------|--------------|--------------|--------------|--------------|--------------|--------------|--------------|--------------|
| At_F0507     | At_F0611     | At_F0188     | At_F0420     | At_F0549     | At_F0668     | Atpeg0005    | Atpeg0045    | Atpeg0108    | At_F0079     | At_F0238     | At_F0321     |
| -            | -            | -            | -            | -            | -            | NA           | NA           | NA           | -            | -            | -            |
| 1.1E-02      | 4.2E-03      | 7.4E-03      | 1.7E-03      | 1.2E-02      | 2.3E-03      | 1.0E-02      | 4.6E-03      | 9.6E-03      | 3.3E-03      | 6.1E-03      | 7.6E-04      |
| 5.8E-03      | 4.6E-03      | 5.9E-03      | 6.9E-03      | 1.3E-02      | 1.7E-03      | 1.0E-02      | 3.1E-03      | 1.1E-02      | 3.3E-03      | 2.8E-03      | 1.4E-03      |
| 1.0E-02      | 1.1E-02      | 4.1E-03      | 2.1E-03      | 4.7E-03      | 3.4E-03      | 6.8E-03      | 2.5E-03      | 1.1E-02      | 1.9E-03      | 1.9E-03      | 1.1E-03      |
| 1.0E-01      | 5.4E-02      | 6.4E-02      | 2.6E-02      | 2.0E-01      | 5.8E-02      | 1.3E-01      | 5.3E-02      | 2.0E-01      | 6.5E-02      | 4.8E-02      | 3.2E-02      |
| 7.0E-02      | 5.3E-02      | 4.9E-02      | 5.1E-02      | 1.3E-01      | 4.8E-02      | 1.3E-01      | 6.0E-02      | 1.7E-01      | 6.6E-02      | 3.5E-02      | 3.8E-02      |
| 7.6E-02      | 1.3E-01      | 2.2E-02      | 4.3E-02      | 4.9E-02      | 6.5E-02      | 9.5E-02      | 5.7E-02      | 2.0E-01      | 3.8E-02      | 3.7E-02      | 2.6E-02      |
| 3.6E+00      | 3.4E+01      | 0.0E+00      | 0.0E+00      | 1.6E+01      | 0.0E+00      | 0.0E+00      | 0.0E+00      | 0.0E+00      | 0.0E+00      | 0.0E+00      | 1.1E+01      |
| 0            | 0            | 0            | 0            | 0            | 0            | 0            | 0            | 0            | 0            | 0            | 0            |
| 1            | 0            | 0            | 0            | 1            | 0            | 0            | 0            | 0            | 0            | 0            | 0            |
| 0            | 0            | 0            | 0            | 0            | 0            | 0            | 0            | 0            | 0            | 0            | 0            |
| 7            | 17           | 0            | 0            | 8            | 0            | 0            | 0            | 0            | 0            | 0            | 0            |
| 11           | 5            | 7            | 0            | 26           | 0            | 0            | 0            | 0            | 0            | 0            | 0            |
| 0            | 27           | 0            | 0            | 33           | 0            | 0            | 0            | 0            | 0            | 0            | 0            |
| 0            | 88           | 0            | 0            | 0            | 0            | 0            | 0            | 0            | 0            | 0            | 0            |
| 11           | 73           | 0            | 0            | 22           | 0            | 0            | 0            | 0            | 0            | 0            | 0            |
| 13           | 20           | 0            | 0            | 7            | 0            | 0            | 0            | 0            | 0            | 0            | 0            |
| 0            | 17           | 0            | 0            | 15           | 0            | 0            | 0            | 0            | 0            | 0            | 6            |
| 0            | 18           | 0            | 0            | 43           | 0            | 0            | 0            | 0            | 0            | 0            | 47           |
| 0            | 5            | 0            | 0            | 0            | 0            | 0            | 0            | 0            | 0            | 0            | 0            |
| 0            | 100          | 0            | 0            | 0            | 0            | 0            | 0            | 0            | 0            | 0            | 0            |
| 0            | 41           | 0            | 0            | 0            | 0            | 0            | 0            | 0            | 0            | 0            | 0            |
| 0            | 0            | 0            | 11           | 0            | 0            | 0            | 27           | 0            | 0            | 0            | 0            |
| 0            | 0            | 0            | 0            | 0            | 0            | 0            | 0            | 0            | 0            | 0            | 0            |
| 0            | 0            | 0            | 0            | 0            | 0            | 0            | 0            | 0            | 0            | 0            | 0            |
| 0            | 0            | 0            | 0            | 0            | 0            | 0            | 0            | 0            | 0            | 0            | 0            |
| 0            | 0            | 0            | 0            | 0            | 0            | 0            | 0            | 0            | 0            | 0            | 0            |
| 0            | 0            | 0            | 0            | 0            | 0            | 0            | 0            | 0            | 0            | 0            | 0            |
| 0            | 0            | 0            | 0            | 0            | 0            | 0            | 0            | 0            | 0            | 0            | 0            |
| 0            | 0            | 0            | 0            | 0            | 0            | 0            | 0            | 0            | 0            | 0            | 0            |
| 0            | 0            | 0            | 0            | 0            | 0            | 0            | 0            | 0            | 0            | 0            | 0            |
| 0            | 0            | 0            | 0            | 0            | 0            | 0            | 0            | 0            | 0            | 0            | 0            |
| 0            | 2            | 0            | 0            | 0            | 0            | 0            | 0            | 0            | 0            | 0            | 0            |
| 0            | 0            | 0            | 0            | 0            | 0            | 0            | 0            | 0            | 0            | 0            | 0            |
| 0            | 25           | 0            | 0            | 0            | 0            | 0            | 0            | 0            | 0            | 0            | 0            |
| 0            | 46           | 0            | 0            | 0            | 0            | 0            | 0            | 0            | 0            | 0            | 0            |
| 0            | 0            | 0            | 0            | 0            | 0            | 0            | 0            | 0            | 0            | 0            | 0            |
| 0            | 0            | 0            | 0            | 0            | 0            | 0            | 0            | 0            | 0            | 0            | 0            |
| 0            | 0            | 0            | 0            | 0            | 0            | 0            | 0            | 0            | 0            | 0            | 0            |
| 0            | 0            | 0            | 0            | 0            | 0            | 0            | 0            | 0            | 0            | 0            | 0            |
| 0            | 0            | 0            | 0            | 0            | 0            | 0            | 0            | 0            | 0            | 0            | 0            |
| 0            | 0            | 0            | 0            | 0            | 0            | 0            | 0            | 0            | 0            | 0            | 0            |
| 0            | 0            | 0            | 0            | 0            | 0            | 0            | 0            | 0            | 0            | 0            | 0            |
| 0            | 0            | 0            | 0            | 0            | 0            | 0            | 0            | 0            | 0            | 0            | 0            |
| 0            | 1            | 0            | 0            | 0            | 0            | 0            | 0            | 0            | 0            | 0            | 0            |
| 0            | 1            | 0            | 0            | 0            | 0            | 0            | 0            | 0            | 0            | 0            | 0            |
| 0            | 0            | 0            | 0            | 0            | 0            | 0            | 0            | 0            | 0            | 0            | 0            |
| 0            | 0            | 0            | 0            | 2            | 0            | 0            | 0            | 0            | 0            | 0            | 0            |
| 3            | 0            | 0            | 0            | 0            | 0            | 0            | 0            | 0            | 0            | 0            | 0            |
| 0            | 7            | 4            | 0            | 0            | 0            | 0            | 0            | 0            | 0            | 0            | 0            |
| 0            | 20           | 0            | 0            | 0            | 0            | 0            | 0            | 0            | 3            | 2            | 0            |
| 0            | 0            | 0            | 0            | 0            | 0            | 0            | 0            | 0            | 1            | 0            | 0            |
| 0            | 0            | 0            | 0            | 0            | 0            | 0            | 0            | 3            | 0            | 0            | 0            |
| 0            | 0            | 0            | 0            | 0            | 0            | 0            | 0            | 0            | 0            | 0            | 0            |
| 1.3E-01      | 1.1E-01      | 2.9E+00      | 5.2E-02      | 3.3E-01      | 6.4E-02      | 5.4E-01      | 1.5E+00      | 1.1E+00      | 7.2E-02      | 1.5E-01      | 8.7E-02      |
| 3.6E-01      | 3.3E-01      | 2.9E-01      | 5.1E-01      | 2.2E-01      | 4.8E-01      | 2.7E-01      | 3.3E-01      | 9.5E-01      | 2.7E-01      | 2.8E-01      | 2.7E-01      |
| 2            | 2            | 2            | 1            | 1            | 3            | 0            | 2            | 0            | 0            | 2            | 2            |
| 0.0E+00      | 1.9E-01      | -1.0E-01     | 0.0E+00      | 0.0E+00      | -4.1E+00     | 0.0E+00      | -2.9E+00     | 0.0E+00      | 0.0E+00      | 5.9E-01      | -5.1E-02     |
| 0.0E+00      |

| Specific_Low |
|--------------|--------------|--------------|--------------|--------------|--------------|--------------|--------------|--------------|--------------|--------------|--------------|
| At_F0340     | At_F0372     | At_F0574     | Atpeg0114    | Atpeg0186    | At_F0113     | At_F0243     | At_F0244     | At_F0390     | At_F0532     | Atpeg0145    | At_F0077     |
| -            | -            | -            | NA           | NA           | -            | -            | -            | -            | -            | NA           | -            |
| 8.8E-03      | 1.1E-02      | 1.6E-03      | 5.7E-03      | 4.1E-03      | 9.1E-03      | 4.2E-03      | 7.3E-03      | 1.3E-02      | 7.9E-03      | 1.3E-02      | 1.9E-03      |
| 4.2E-03      | 1.2E-02      | 6.4E-04      | 4.4E-03      | 3.3E-03      | 7.8E-03      | 4.2E-03      | 3.2E-03      | 1.5E-02      | 6.5E-03      | 9.9E-03      | 4.1E-03      |
| 5.9E-03      | 4.9E-03      | 4.7E-03      | 9.4E-03      | 1.9E-03      | 4.2E-03      | 9.8E-04      | 7.8E-03      | 1.5E-02      | 7.6E-03      | 6.6E-03      | 5.3E-03      |
| 9.0E-02      | 7.9E-02      | 4.4E-02      | 5.7E-02      | 6.9E-02      | 1.3E-01      | 4.4E-02      | 4.6E-02      | 7.7E-02      | 5.4E-02      | 1.9E-01      | 4.4E-02      |
| 4.4E-02      | 7.7E-02      | 3.7E-02      | 3.3E-02      | 6.9E-02      | 8.4E-02      | 2.5E-02      | 5.6E-02      | 8.6E-02      | 7.1E-02      | 8.3E-02      | 4.9E-02      |
| 4.4E-02      | 4.6E-02      | 8.5E-02      | 4.3E-02      | 9.2E-02      | 7.3E-02      | 3.6E-02      | 6.8E-02      | 9.6E-02      | 6.2E-02      | 7.9E-02      | 4.9E-02      |
| 0.0E+00      | 3.8E+01      | 0.0E+00      | 2.9E+00      | 0.0E+00      | 0.0E+00      |
| 0            | 0            | 0            | 0            | 0            | 0            | 0            | 52           | 0            | 3            | 0            | 3            |
| 0            | 0            | 0            | 1            | 0            | 0            | 0            | 4            | 0            | 0            | 0            | 0            |
| 0            | 0            | 0            | 0            | 0            | 0            | 0            | 0            | 0            | 0            | 0            | 0            |
| 0            | 10           | 0            | 0            | 0            | 0            | 0            | 0            | 0            | 0            | 0            | 0            |
| 0            | 0            | 0            | 0            | 0            | 0            | 0            | 0            | 0            | 0            | 0            | 36           |
| 0            | 0            | 0            | 0            | 0            | 0            | 0            | 0            | 0            | 0            | 0            | 0            |
| 0            | 0            | 0            | 0            | 0            | 0            | 0            | 20           | 0            | 33           | 0            | 0            |
| 0            | 0            | 0            | 0            | 0            | 0            | 0            | 100          | 0            | 0            | 0            | 0            |
| 0            | 0            | 0            | 0            | 0            | 0            | 0            | 44           | 0            | 0            | 0            | 0            |
| 0            | 0            | 0            | 0            | 0            | 0            | 0            | 45           | 0            | 8            | 0            | 0            |
| 0            | 0            | 0            | 0            | 0            | 0            | 0            | 0            | 0            | 0            | 0            | 0            |
| 0            | 0            | 0            | 0            | 0            | 0            | 0            | 0            | 22           | 0            | 0            | 0            |
| 0            | 0            | 0            | 0            | 33           | 0            | 0            | 0            | 0            | 0            | 0            | 0            |
| 0            | 0            | 0            | 21           | 0            | 0            | 0            | 0            | 30           | 0            | 0            | 0            |
| 0            | 0            | 0            | 37           | 0            | 12           | 0            | 0            | 25           | 0            | 0            | 0            |
| 0            | 0            | 0            | 50           | 0            | 23           | 0            | 0            | 50           | 0            | 0            | 33           |
| 8            | 0            | 0            | 75           | 67           | 0            | 0            | 0            | 0            | 0            | 50           | 100          |
| 0            | 0            | 0            | 0            | 0            | 0            | 0            | 0            | 0            | 0            | 0            | 0            |
| 0            | 0            | 0            | 0            | 0            | 0            | 0            | 0            | 0            | 0            | 0            | 0            |
| 0            | 0            | 0            | 0            | 0            | 0            | 0            | 0            | 0            | 10           | 0            | 0            |
| 0            | 0            | 0            | 0            | 0            | 0            | 0            | 0            | 0            | 0            | 0            | 0            |
| 0            | 0            | 0            | 0            | 0            | 0            | 0            | 100          | 0            | 0            | 0            | 0            |
| 0            | 0            | 0            | 0            | 0            | 0            | 0            | 0            | 22           | 0            | 4            | 0            |
| 0            | 0            | 0            | 0            | 0            | 0            | 0            | 28           | 0            | 0            | 0            | 0            |
| 0            | 0            | 0            | 0            | 0            | 0            | 0            | 0            | 0            | 0            | 0            | 5            |
| 0            | 0            | 0            | 0            | 0            | 0            | 0            | 17           | 0            | 0            | 0            | 0            |
| 0            | 0            | 0            | 0            | 0            | 0            | 0            | 0            | 0            | 0            | 0            | 0            |
| 0            | 8            | 0            | 0            | 0            | 0            | 0            | 0            | 0            | 0            | 0            | 0            |
| 0            | 0            | 0            | 0            | 0            | 0            | 0            | 0            | 0            | 0            | 0            | 0            |
| 0            | 0            | 0            | 0            | 0            | 0            | 0            | 0            | 0            | 0            | 100          | 0            |
| 0            | 0            | 0            | 0            | 0            | 0            | 0            | 0            | 0            | 0            | 0            | 0            |
| 0            | 0            | 0            | 0            | 0            | 0            | 0            | 5            | 0            | 0            | 0            | 6            |
| 0            | 0            | 0            | 0            | 0            | 2            | 0            | 0            | 0            | 0            | 0            | 0            |
| 0            | 0            | 0            | 0            | 0            | 0            | 0            | 0            | 0            | 1            | 0            | 0            |
| 0            | 0            | 0            | 0            | 0            | 0            | 0            | 0            | 0            | 0            | 0            | 0            |
| 0            | 0            | 0            | 3            | 0            | 0            | 0            | 0            | 0            | 0            | 0            | 0            |
| 0            | 0            | 0            | 0            | 0            | 0            | 0            | 10           | 0            | 0            | 0            | 0            |
| 0            | 0            | 0            | 2            | 0            | 0            | 0            | 2            | 0            | 0            | 0            | 0            |
| 0            | 1            | 0            | 0            | 0            | 0            | 0            | 3            | 0            | 0            | 0            | 0            |
| 0            | 0            | 0            | 0            | 0            | 0            | 0            | 0            | 0            | 0            | 0            | 0            |
| 0            | 0            | 0            | 0            | 0            | 0            | 0            | 0            | 0            | 0            | 0            | 0            |
| 0            | 0            | 0            | 3            | 0            | 0            | 0            | 0            | 0            | 0            | 0            | 0            |
| 0            | 0            | 0            | 2            | 0            | 0            | 0            | 0            | 0            | 0            | 0            | 2            |
| 0            | 1            | 0            | 0            | 0            | 0            | 0            | 0            | 0            | 0            | 0            | 0            |
| 0            | 0            | 0            | 0            | 0            | 0            | 0            | 0            | 0            | 0            | 13           | 0            |
| 0            | 0            | 0            | 0            | 0            | 0            | 0            | 0            | 0            | 0            | 25           | 0            |
| 1.9E-01      | 2.2E+00      | 7.9E-02      | 5.6E-02      | 1.1E-01      | 1.1E+00      | 9.1E-02      | 1.3E-01      | 1.9E-01      | 1.4E+00      | 4.4E-01      | 5.6E-02      |
| 4.5E-01      | 2.4E-01      | 6.7E-01      | 5.2E-01      | 2.7E-01      | 1.5E-01      | 4.3E-02      | 1.9E-01      | 2.4E-01      | 1.7E-01      | 2.3E-01      | 2.5E-01      |
| 2            | 2            | 2            | 0            | 2            | 0            | 3            | 2            | 2            | 0            | 2            | 2            |
| -2.1E-02     | 4.6E-01      | 1.0E+00      | 0.0E+00      | 8.4E-01      | 0.0E+00      | 0.0E+00      | 5.1E-01      | 3.6E-01      | 0.0E+00      | 6.9E-01      | -1.3E+00     |
| 0.0E+00      |

| Specific_Low |
|--------------|--------------|--------------|--------------|--------------|--------------|--------------|--------------|--------------|--------------|--------------|--------------|--------------|
| At_F0250     | At_F0343     | At_F0608     | At_F0663     | Atpeg0125    | At_F0062     | At_F0074     | At_F0239     | At_F0349     | At_F0025     | At_F0154     | At_F0488     |              |
| -            | bm           | -            | -            | NA           | -            | -            | bm           | -            | -            | -            | -            |              |
| 3.2E-03      | 1.6E-02      | 7.1E-03      | 6.6E-03      | 6.3E-03      | 8.2E-04      | 4.2E-03      | 3.3E-03      | 1.8E-03      | 6.5E-03      | 3.7E-03      | 1.5E-02      |              |
| 2.8E-03      | 8.9E-03      | 3.0E-03      | 2.0E-03      | 3.1E-03      | 3.8E-04      | 3.1E-03      | 3.0E-03      | 3.0E-03      | 1.2E-02      | 5.7E-03      | 1.4E-02      |              |
| 2.4E-03      | 1.1E-02      | 6.0E-03      | 3.1E-03      | 2.9E-03      | 1.0E-03      | 9.5E-03      | 9.6E-03      | 7.8E-04      | 9.7E-03      | 4.6E-03      | 9.1E-03      |              |
| 4.5E-02      | 2.2E-01      | 6.2E-02      | 1.0E-01      | 1.1E-01      | 2.8E-02      | 7.4E-02      | 7.2E-02      | 2.6E-02      | 1.4E-01      | 7.4E-02      | 1.3E-01      |              |
| 4.0E-02      | 1.2E-01      | 4.4E-02      | 2.6E-02      | 4.2E-02      | 2.3E-02      | 5.4E-02      | 8.4E-02      | 4.5E-02      | 1.1E-01      | 1.2E-01      | 9.7E-02      |              |
| 6.2E-02      | 1.2E-01      | 5.7E-02      | 4.4E-02      | 5.8E-02      | 2.5E-02      | 9.4E-02      | 1.4E-01      | 2.0E-02      | 8.3E-02      | 7.3E-02      | 8.6E-02      |              |
| 0.0E+00      | 2.0E+01      | 0.0E+00      | 1.7E+00      | 4.8E+00      | 2.4E+00      | 8.8E+00      | 2.4E+01      | 0.0E+00      | 0.0E+00      | 4.4E+01      | 2.4E+00      |              |
| 0            | 0            | 0            | 0            | 12           | 0            | 14           | 0            | 0            | 0            | 58           | 0            |              |
| 0            | 1            | 1            | 0            | 1            | 1            | 2            | 0            | 0            | 0            | 3            | 0            |              |
| 0            | 88           | 0            | 0            | 0            | 0            | 0            | 0            | 0            | 0            | 0            | 0            |              |
| 0            | 0            | 0            | 0            | 0            | 0            | 0            | 0            | 0            | 0            | 0            | 0            |              |
| 0            | 0            | 0            | 6            | 15           | 10           | 28           | 0            | 0            | 12           | 0            | 6            |              |
| 0            | 0            | 0            | 0            | 9            | 0            | 8            | 0            | 0            | 47           | 0            | 0            |              |
| 0            | 0            | 0            | 0            | 0            | 0            | 0            | 0            | 0            | 0            | 0            | 0            |              |
| 0            | 0            | 0            | 0            | 0            | 0            | 0            | 5            | 0            | 0            | 50           | 9            |              |
| 0            | 0            | 0            | 0            | 0            | 0            | 0            | 28           | 0            | 0            | 57           | 0            |              |
| 0            | 20           | 0            | 5            | 0            | 0            | 20           | 35           | 0            | 0            | 40           | 0            |              |
| 0            | 43           | 0            | 0            | 23           | 13           | 14           | 0            | 0            | 0            | 44           | 0            |              |
| 0            | 43           | 0            | 0            | 0            | 0            | 0            | 100          | 0            | 0            | 100          | 0            |              |
| 0            | 0            | 0            | 0            | 0            | 0            | 0            | 0            | 0            | 0            | 100          | 0            |              |
| 15           | 0            | 0            | 0            | 0            | 0            | 0            | 100          | 0            | 33           | 0            | 0            |              |
| 4            | 0            | 0            | 0            | 0            | 39           | 0            | 0            | 29           | 28           | 0            | 0            |              |
| 0            | 0            | 0            | 0            | 15           | 64           | 0            | 67           | 45           | 39           | 0            | 0            |              |
| 0            | 0            | 0            | 0            | 50           | 50           | 0            | 0            | 67           | 44           | 0            | 18           |              |
| 0            | 40           | 0            | 0            | 0            | 0            | 0            | 0            | 0            | 0            | 0            | 0            |              |
| 0            | 0            | 0            | 0            | 0            | 0            | 0            | 0            | 0            | 0            | 0            | 0            |              |
| 0            | 0            | 0            | 0            | 21           | 0            | 25           | 0            | 0            | 0            | 0            | 0            |              |
| 0            | 0            | 0            | 0            | 0            | 0            | 0            | 0            | 0            | 33           | 0            | 0            |              |
| 0            | 0            | 0            | 0            | 0            | 0            | 0            | 0            | 0            | 0            | 0            | 0            |              |
| 0            | 0            | 0            | 0            | 0            | 0            | 0            | 9            | 0            | 0            | 0            | 0            |              |
| 0            | 0            | 0            | 0            | 0            | 0            | 0            | 0            | 9            | 0            | 38           | 0            |              |
| 0            | 0            | 0            | 0            | 5            | 0            | 19           | 0            | 0            | 0            | 14           | 0            |              |
| 0            | 0            | 0            | 0            | 20           | 0            | 11           | 0            | 0            | 0            | 44           | 0            |              |
| 0            | 0            | 0            | 0            | 0            | 0            | 0            | 0            | 0            | 0            | 100          | 0            |              |
| 0            | 0            | 0            | 0            | 0            | 0            | 0            | 0            | 0            | 0            | 0            | 0            |              |
| 20           | 0            | 0            | 0            | 0            | 0            | 0            | 0            | 0            | 0            | 75           | 0            |              |
| 0            | 0            | 0            | 0            | 0            | 0            | 0            | 0            | 0            | 0            | 0            | 0            |              |
| 0            | 0            | 20           | 0            | 0            | 0            | 0            | 33           | 0            | 0            | 0            | 0            |              |
| 0            | 0            | 0            | 0            | 0            | 0            | 0            | 0            | 0            | 0            | 0            | 0            |              |
| 3            | 4            | 0            | 0            | 0            | 4            | 0            | 0            | 0            | 0            | 0            | 0            |              |
| 0            | 0            | 0            | 0            | 0            | 0            | 0            | 0            | 0            | 0            | 0            | 0            |              |
| 0            | 0            | 0            | 0            | 3            | 0            | 5            | 0            | 0            | 0            | 1            | 0            |              |
| 0            | 0            | 0            | 0            | 0            | 0            | 0            | 0            | 0            | 12           | 0            | 0            |              |
| 0            | 0            | 0            | 0            | 0            | 0            | 0            | 0            | 0            | 0            | 0            | 0            |              |
| 0            | 0            | 0            | 0            | 0            | 4            | 0            | 0            | 0            | 0            | 0            | 0            |              |
| 0            | 2            | 0            | 0            | 0            | 0            | 0            | 0            | 0            | 0            | 0            | 0            |              |
| 0            | 0            | 1            | 0            | 1            | 0            | 4            | 0            | 0            | 0            | 0            | 0            |              |
| 0            | 0            | 1            | 0            | 2            | 0            | 0            | 0            | 0            | 0            | 5            | 0            |              |
| 0            | 0            | 0            | 0            | 0            | 0            | 0            | 0            | 0            | 0            | 10           | 0            |              |
| 0            | 0            | 0            | 0            | 0            | 0            | 0            | 0            | 0            | 0            | 14           | 0            |              |
| 2            | 0            | 0            | 0            | 0            | 0            | 0            | 0            | 0            | 0            | 12           | 0            |              |
| 0            | 0            | 3            | 0            | 0            | 0            | 1            | 0            | 1            | 0            | 0            | 3            |              |
| 0            | 0            | 3            | 0            | 0            | 2            | 0            | 11           | 0            | 0            | 0            | 0            |              |
| 0            | 0            | 0            | 0            | 0            | 5            | 0            | 0            | 0            | 0            | 4            | 0            |              |
| 7.3E-02      | 1.5E+00      | 1.0E-01      | 5.9E-02      | 6.4E-01      | 2.2E-01      | 6.6E-02      | 2.1E+00      | 7.2E-02      | 1.3E-01      | 1.7E+00      | 8.9E-01      |              |
| 1.6E-01      | 3.8E-01      | 4.1E-01      | 3.3E-01      | 2.4E-01      | 3.4E-01      | 1.9E-01      | 3.0E-01      | 3.0E-01      | 3.2E-01      | 1.4E-01      | 3.0E-01      |              |
| 2            | 2            | 2            | 2            | 2            | 2            | 3            | 4            | 2            | 2            | 2            | 2            |              |
| 5.5E-01      | 3.3E-01      | -2.4E-02     | 2.7E-01      | 8.0E-01      | 0.0E+00      | 0.0E+00      | 4.3E-01      | 6.8E-01      | -6.5E-02     | -2.3E-02     | 4.3E-01      |              |
| 0.0E+00      |              |

| Specific_Low |
|--------------|--------------|--------------|--------------|--------------|--------------|--------------|--------------|--------------|--------------|--------------|--------------|
| At_F0131     | At_F0227     | At_F0457     | Atpeg0016    | Atpeg0123    | At_F0004     | At_F0263     | Atpeg0082    | At_F0104     | At_F0480     | At_F0688     | At_F0562     |
| -            | -            | -            | NA           | NA           | -            | -            | NA           | -            | -            | -            | -            |
| 8.8E-03      | 1.3E-03      | 7.8E-03      | 6.4E-03      | 2.4E-03      | 1.1E-02      | 1.8E-03      | 3.9E-03      | 1.2E-02      | 3.9E-03      | 1.2E-02      | 9.2E-03      |
| 5.0E-03      | 2.5E-03      | 1.0E-02      | 5.8E-03      | 3.5E-03      | 5.6E-03      | 3.3E-03      | 4.2E-03      | 6.3E-03      | 8.2E-03      | 7.4E-03      | 2.2E-02      |
| 5.0E-03      | 1.2E-03      | 1.5E-02      | 2.9E-03      | 9.5E-04      | 3.7E-03      | 1.0E-02      | 8.3E-03      | 4.4E-03      | 4.7E-03      | 9.4E-03      | 1.9E-02      |
| 1.9E-01      | 3.7E-02      | 1.0E-01      | 1.2E-01      | 6.4E-02      | 1.6E-01      | 5.1E-02      | 4.1E-02      | 8.8E-02      | 5.6E-02      | 1.1E-01      | 1.5E-01      |
| 7.1E-02      | 3.5E-02      | 1.5E-01      | 5.1E-02      | 6.7E-02      | 9.8E-02      | 3.9E-02      | 3.2E-02      | 7.0E-02      | 5.9E-02      | 9.0E-02      | 1.2E-01      |
| 9.3E-02      | 3.8E-02      | 1.9E-01      | 4.1E-02      | 4.6E-02      | 7.1E-02      | 7.2E-02      | 3.1E-02      | 6.0E-02      | 4.9E-02      | 1.7E-01      | 1.1E-01      |
| 0.0E+00      | 0.0E+00      | 2.0E+01      | 0.0E+00      | 8.8E+00      | 4.1E+00      | 5.2E+00      | 0.0E+00      | 0.0E+00      | 0.0E+00      | 1.1E+01      | 0.0E+00      |
| 0            | 0            | 39           | 0            | 0            | 0            | 0            | 0            | 0            | 0            | 6            | 0            |
| 0            | 0            | 7            | 0            | 0            | 0            | 0            | 0            | 0            | 0            | 1            | 2            |
| 0            | 0            | 0            | 100          | 14           | 0            | 0            | 0            | 0            | 0            | 0            | 0            |
| 0            | 0            | 0            | 25           | 17           | 44           | 0            | 0            | 0            | 0            | 0            | 0            |
| 0            | 0            | 0            | 36           | 16           | 17           | 0            | 0            | 0            | 0            | 0            | 0            |
| 0            | 0            | 0            | 56           | 0            | 0            | 0            | 0            | 0            | 0            | 0            | 0            |
| 0            | 0            | 0            | 0            | 0            | 0            | 0            | 0            | 0            | 0            | 0            | 0            |
| 0            | 0            | 0            | 0            | 9            | 0            | 0            | 0            | 0            | 0            | 0            | 0            |
| 0            | 0            | 6            | 0            | 17           | 10           | 0            | 0            | 0            | 0            | 0            | 0            |
| 0            | 0            | 29           | 0            | 14           | 0            | 18           | 0            | 0            | 0            | 0            | 0            |
| 0            | 0            | 42           | 0            | 0            | 18           | 0            | 0            | 0            | 0            | 0            | 0            |
| 0            | 0            | 91           | 0            | 0            | 0            | 0            | 0            | 0            | 0            | 71           | 0            |
| 0            | 0            | 100          | 0            | 0            | 0            | 0            | 0            | 0            | 0            | 0            | 0            |
| 0            | 0            | 50           | 0            | 0            | 0            | 0            | 0            | 0            | 0            | 11           | 0            |
| 0            | 0            | 33           | 0            | 30           | 0            | 0            | 11           | 0            | 0            | 10           | 0            |
| 0            | 0            | 17           | 0            | 25           | 0            | 0            | 17           | 0            | 0            | 25           | 0            |
| 67           | 0            | 100          | 0            | 0            | 67           | 0            | 0            | 0            | 0            | 0            | 0            |
| 0            | 0            | 0            | 0            | 0            | 0            | 0            | 0            | 0            | 0            | 0            | 0            |
| 0            | 0            | 0            | 0            | 0            | 42           | 0            | 0            | 0            | 0            | 0            | 0            |
| 0            | 0            | 0            | 9            | 0            | 0            | 0            | 0            | 0            | 0            | 0            | 0            |
| 0            | 0            | 0            | 10           | 0            | 0            | 0            | 0            | 0            | 0            | 0            | 0            |
| 0            | 0            | 0            | 29           | 0            | 0            | 0            | 0            | 0            | 0            | 0            | 0            |
| 0            | 0            | 0            | 0            | 0            | 0            | 0            | 0            | 0            | 0            | 0            | 0            |
| 0            | 0            | 0            | 0            | 0            | 0            | 0            | 0            | 0            | 0            | 0            | 0            |
| 0            | 0            | 17           | 0            | 0            | 0            | 0            | 0            | 0            | 0            | 0            | 0            |
| 0            | 0            | 47           | 0            | 0            | 0            | 0            | 0            | 0            | 0            | 0            | 0            |
| 0            | 0            | 77           | 0            | 0            | 0            | 0            | 0            | 0            | 0            | 29           | 0            |
| 0            | 0            | 90           | 0            | 0            | 0            | 0            | 0            | 0            | 0            | 0            | 0            |
| 0            | 0            | 38           | 0            | 0            | 14           | 0            | 0            | 0            | 0            | 0            | 0            |
| 0            | 0            | 50           | 0            | 0            | 0            | 0            | 0            | 0            | 0            | 17           | 0            |
| 0            | 0            | 50           | 0            | 0            | 0            | 0            | 0            | 0            | 0            | 22           | 0            |
| 0            | 0            | 75           | 0            | 0            | 0            | 0            | 0            | 0            | 0            | 0            | 0            |
| 0            | 0            | 0            | 0            | 0            | 0            | 0            | 0            | 0            | 0            | 0            | 0            |
| 0            | 0            | 0            | 3            | 0            | 3            | 0            | 0            | 0            | 0            | 0            | 0            |
| 0            | 0            | 0            | 3            | 0            | 0            | 0            | 0            | 0            | 0            | 0            | 0            |
| 0            | 0            | 0            | 33           | 0            | 0            | 0            | 0            | 1            | 0            | 0            | 0            |
| 0            | 0            | 0            | 0            | 0            | 0            | 0            | 3            | 0            | 0            | 4            | 0            |
| 0            | 0            | 0            | 0            | 0            | 0            | 0            | 0            | 0            | 0            | 2            | 0            |
| 0            | 0            | 0            | 0            | 0            | 0            | 0            | 0            | 0            | 0            | 0            | 0            |
| 0            | 0            | 4            | 0            | 0            | 0            | 0            | 0            | 0            | 0            | 0            | 3            |
| 0            | 0            | 5            | 0            | 0            | 0            | 0            | 0            | 0            | 0            | 0            | 0            |
| 0            | 0            | 22           | 0            | 0            | 0            | 0            | 0            | 0            | 0            | 0            | 0            |
| 0            | 0            | 13           | 0            | 0            | 0            | 0            | 0            | 0            | 0            | 0            | 0            |
| 0            | 0            | 17           | 0            | 0            | 0            | 0            | 0            | 0            | 0            | 0            | 0            |
| 0            | 0            | 0            | 0            | 0            | 0            | 0            | 0            | 0            | 0            | 3            | 0            |
| 0            | 0            | 17           | 0            | 1            | 0            | 0            | 0            | 0            | 0            | 3            | 0            |
| 0            | 0            | 42           | 0            | 0            | 0            | 0            | 0            | 0            | 0            | 2            | 0            |
| 9.5E-02      | 6.9E-02      | 2.8E-01      | 1.0E-01      | 2.0E-01      | 2.9E-01      | 6.9E-02      | 5.4E-01      | 1.0E+00      | 1.4E-01      | 2.7E-01      | 2.8E+00      |
| 4.4E-01      | 3.4E-01      | 3.2E-01      | 9.0E-01      | 3.1E-01      | 9.4E-02      | 3.0E-01      | 4.0E-02      | 2.6E-01      | 4.6E-01      | 2.2E-01      | 6.2E-01      |
| 0            | 2            | 2            | 0            | 2            | 2            | 4            | 2            | 2            | 2            | 1            | 0            |
| 0.0E+00      | -4.0E-01     | -5.0E-01     | 0.0E+00      | 1.4E-01      | 5.5E-01      | 7.1E-01      | -3.5E-01     | 4.3E-01      | 4.1E-01      | 0.0E+00      | 0.0E+00      |
| 0.0E+00      |

| Specific_Low |
|--------------|--------------|--------------|--------------|--------------|--------------|--------------|--------------|--------------|--------------|--------------|--------------|
| At_F0603     | Atpeg0023    | Atpeg0106    | At_F0149     | At_F0071     | Atpeg0140    | At_F0284     | At_F0317     | At_F0353     | At_F0288     | At_F0597     | At_F0305     |
| -            | NA           | NA           | -            | -            | NA           | -            | -            | -            | -            | -            | -            |
| 0.0E+00      | 0.0E+00      | 6.1E-03      | 3.5E-03      | 1.2E-02      | 1.1E-02      | 8.9E-03      | 1.5E-02      | 1.4E-02      | 1.7E-03      | 9.2E-03      | 1.1E-02      |
| 0.0E+00      | 0.0E+00      | 2.8E-03      | 3.8E-03      | 6.7E-03      | 4.3E-03      | 4.9E-03      | 1.2E-02      | 1.9E-02      | 3.3E-03      | 1.0E-02      | 4.7E-03      |
| 0.0E+00      | 0.0E+00      | 5.1E-03      | 4.4E-03      | 8.3E-03      | 1.2E-02      | 6.4E-03      | 1.0E-02      | 1.1E-02      | 3.2E-03      | 4.8E-03      | 8.0E-03      |
| 0.0E+00      | 0.0E+00      | 7.6E-02      | 1.1E-01      | 1.1E-01      | 1.1E-01      | 8.5E-02      | 2.0E-01      | 1.6E-01      | 3.3E-02      | 1.5E-01      | 8.8E-02      |
| 0.0E+00      | 0.0E+00      | 5.8E-02      | 1.1E-01      | 7.4E-02      | 5.9E-02      | 6.4E-02      | 1.4E-01      | 1.2E-01      | 4.2E-02      | 1.0E-01      | 7.7E-02      |
| 0.0E+00      | 0.0E+00      | 8.3E-02      | 1.1E-01      | 9.6E-02      | 9.0E-02      | 8.1E-02      | 9.8E-02      | 1.2E-01      | 3.5E-02      | 5.3E-02      | 7.6E-02      |
| 0.0E+00      | 0.0E+00      | 0.0E+00      | 4.4E+00      | 5.6E+00      | 2.8E+00      | 2.3E+00      | 6.6E+00      | 0.0E+00      | 0.0E+00      | 1.0E+01      | 1.3E+01      |
| 0            | 0            | 0            | 3            | 0            | 0            | 0            | 0            | 0            | 0            | 0            | 13           |
| 0            | 0            | 0            | 0            | 0            | 1            | 0            | 1            | 1            | 0            | 1            | 2            |
| 0            | 0            | 0            | 0            | 0            | 0            | 0            | 0            | 0            | 0            | 56           | 100          |
| 0            | 0            | 0            | 0            | 0            | 0            | 5            | 0            | 0            | 0            | 8            | 29           |
| 0            | 0            | 0            | 38           | 0            | 0            | 0            | 0            | 0            | 0            | 0            | 0            |
| 0            | 0            | 0            | 100          | 0            | 0            | 0            | 0            | 0            | 0            | 0            | 0            |
| 0            | 0            | 0            | 0            | 0            | 0            | 0            | 11           | 0            | 0            | 0            | 0            |
| 0            | 0            | 0            | 18           | 7            | 0            | 0            | 0            | 0            | 0            | 50           | 85           |
| 0            | 0            | 35           | 0            | 0            | 0            | 5            | 0            | 0            | 0            | 6            | 0            |
| 0            | 0            | 0            | 0            | 12           | 0            | 0            | 5            | 0            | 0            | 0            | 0            |
| 0            | 0            | 0            | 0            | 0            | 15           | 0            | 0            | 0            | 0            | 0            | 0            |
| 0            | 0            | 0            | 33           | 25           | 0            | 17           | 67           | 0            | 0            | 33           | 0            |
| 0            | 0            | 0            | 0            | 0            | 0            | 0            | 0            | 0            | 0            | 0            | 0            |
| 0            | 0            | 0            | 0            | 0            | 0            | 0            | 0            | 0            | 0            | 0            | 0            |
| 0            | 0            | 0            | 0            | 0            | 0            | 0            | 0            | 0            | 0            | 0            | 0            |
| 0            | 0            | 0            | 0            | 0            | 0            | 0            | 0            | 0            | 0            | 0            | 0            |
| 0            | 0            | 0            | 100          | 0            | 60           | 0            | 0            | 0            | 0            | 0            | 0            |
| 0            | 0            | 0            | 0            | 0            | 0            | 0            | 0            | 0            | 0            | 0            | 71           |
| 0            | 0            | 0            | 0            | 0            | 0            | 0            | 0            | 0            | 0            | 0            | 0            |
| 0            | 0            | 0            | 11           | 0            | 0            | 0            | 0            | 0            | 0            | 0            | 0            |
| 0            | 0            | 0            | 33           | 0            | 0            | 0            | 0            | 0            | 0            | 0            | 0            |
| 0            | 0            | 0            | 0            | 0            | 0            | 0            | 0            | 0            | 0            | 0            | 0            |
| 0            | 0            | 0            | 0            | 0            | 0            | 0            | 0            | 0            | 0            | 0            | 63           |
| 0            | 0            | 0            | 6            | 0            | 0            | 0            | 0            | 0            | 0            | 0            | 0            |
| 0            | 0            | 0            | 0            | 0            | 0            | 0            | 0            | 0            | 0            | 0            | 0            |
| 0            | 0            | 0            | 0            | 0            | 0            | 0            | 0            | 0            | 0            | 0            | 0            |
| 0            | 0            | 0            | 0            | 0            | 0            | 0            | 0            | 0            | 0            | 0            | 0            |
| 0            | 0            | 0            | 0            | 0            | 0            | 0            | 0            | 0            | 0            | 0            | 0            |
| 0            | 0            | 0            | 0            | 0            | 0            | 0            | 0            | 0            | 0            | 0            | 0            |
| 0            | 0            | 0            | 0            | 0            | 0            | 0            | 0            | 0            | 0            | 0            | 0            |
| 0            | 0            | 0            | 0            | 0            | 0            | 0            | 0            | 0            | 0            | 0            | 0            |
| 0            | 0            | 0            | 0            | 0            | 0            | 0            | 0            | 0            | 0            | 0            | 0            |
| 0            | 0            | 0            | 0            | 0            | 0            | 0            | 0            | 0            | 0            | 0            | 0            |
| 0            | 0            | 0            | 0            | 0            | 0            | 0            | 0            | 0            | 0            | 0            | 0            |
| 0            | 0            | 0            | 28           | 3            | 0            | 0            | 0            | 0            | 0            | 6            | 17           |
| 0            | 0            | 0            | 0            | 0            | 0            | 0            | 0            | 3            | 0            | 3            | 0            |
| 0            | 0            | 0            | 3            | 0            | 0            | 0            | 2            | 0            | 0            | 0            | 0            |
| 0            | 0            | 0            | 9            | 0            | 0            | 0            | 0            | 0            | 0            | 0            | 0            |
| 0            | 0            | 0            | 0            | 0            | 3            | 0            | 0            | 0            | 0            | 0            | 0            |
| 0            | 0            | 0            | 0            | 0            | 0            | 0            | 0            | 0            | 0            | 4            | 14           |
| 0            | 0            | 0            | 0            | 0            | 0            | 0            | 2            | 2            | 0            | 1            | 0            |
| 0            | 0            | 0            | 0            | 0            | 1            | 0            | 0            | 0            | 0            | 0            | 0            |
| 0            | 0            | 0            | 0            | 0            | 0            | 0            | 0            | 0            | 0            | 0            | 0            |
| 0            | 0            | 2            | 0            | 0            | 0            | 0            | 0            | 0            | 0            | 0            | 0            |
| 0            | 0            | 0            | 0            | 6            | 0            | 0            | 0            | 0            | 0            | 0            | 0            |
| 0            | 0            | 0            | 0            | 0            | 0            | 0            | 0            | 0            | 0            | 0            | 0            |
| 0            | 0            | 0            | 0            | 0            | 0            | 0            | 0            | 0            | 0            | 0            | 0            |
| 0            | 0            | 0            | 0            | 0            | 0            | 0            | 0            | 0            | 0            | 0            | 0            |
| 0            | 0            | 0            | 0            | 0            | 0            | 0            | 0            | 0            | 0            | 0            | 0            |
| 0            | 0            | 0            | 0            | 0            | 0            | 0            | 0            | 0            | 0            | 3            | 0            |
| 0.0E+00      | 0.0E+00      | 4.0E-01      | 1.8E+00      | 7.7E-01      | 9.9E-02      | 4.1E-01      | 3.8E-01      | 2.0E-01      | 6.4E-02      | 3.1E-01      | 7.9E-02      |
| 8.9E-02      | 3.0E-01      | 3.4E-01      | 2.6E-01      | 2.4E-01      | 2.1E-01      | 4.5E-01      | 2.2E-01      | 5.1E-01      | 1.6E-01      | 1.9E-01      | 2.3E-01      |
| 2            | 2            | 2            | 3            | 2            | 3            | 0            | 2            | 0            | 0            | 2            | 1            |
| 0.0E+00      | 0.0E+00      | -1.6E-01     | -1.1E+00     | 8.1E-02      | 9.7E-02      | 0.0E+00      | -1.0E+00     | 0.0E+00      | 0.0E+00      | -1.4E-01     | 0.0E+00      |
| 0.0E+00      |

| Specific_Low |
|--------------|--------------|--------------|--------------|--------------|--------------|--------------|--------------|--------------|--------------|--------------|--------------|--------------|
| Atpeg0137    | At_F0009     | At_F0050     | At_F0057     | At_F0070     | At_F0096     | At_F0162     | At_F0169     | At_F0181     | At_F0206     | At_F0209     | At_F0253     |              |
| NA           | -            | -            | -            | -            | -            | -            | -            | -            | -            | -            | -            | -            |
| 1.7E-03      | 1.8E-02      | 4.8E-03      | 4.2E-03      | 5.1E-03      | 9.8E-03      | 2.7E-03      | 1.1E-02      | 5.3E-03      | 1.4E-02      | 1.5E-03      | 1.4E-02      |              |
| 1.5E-03      | 1.1E-02      | 1.4E-03      | 2.7E-03      | 4.4E-03      | 6.6E-03      | 4.1E-03      | 6.3E-03      | 1.2E-03      | 3.6E-03      | 4.7E-03      | 6.7E-03      |              |
| 1.8E-03      | 4.0E-03      | 9.0E-04      | 2.6E-03      | 3.0E-03      | 1.2E-02      | 3.2E-03      | 8.9E-03      | 4.0E-03      | 1.1E-02      | 3.8E-03      | 1.3E-02      |              |
| 2.9E-02      | 1.6E-01      | 5.6E-02      | 4.4E-02      | 9.3E-02      | 1.1E-01      | 4.6E-02      | 9.4E-02      | 4.0E-02      | 1.6E-01      | 2.2E-02      | 2.1E-01      |              |
| 3.7E-02      | 5.9E-02      | 4.9E-02      | 4.1E-02      | 5.3E-02      | 8.1E-02      | 3.4E-02      | 6.2E-02      | 2.5E-02      | 4.1E-02      | 4.1E-02      | 7.0E-02      |              |
| 3.9E-02      | 5.4E-02      | 2.6E-02      | 5.4E-02      | 5.1E-02      | 1.2E-01      | 4.2E-02      | 7.1E-02      | 5.1E-02      | 6.4E-02      | 3.2E-02      | 1.2E-01      |              |
| 0.0E+00      | 0.0E+00      | 0.0E+00      | 1.7E+01      | 0.0E+00      | 0.0E+00      | 0.0E+00      | 7.7E+00      | 0.0E+00      | 4.4E+00      | 0.0E+00      | 0.0E+00      |              |
| 0            | 0            | 0            | 4            | 0            | 2            | 0            | 6            | 0            | 0            | 0            | 0            |              |
| 0            | 0            | 0            | 1            | 0            | 0            | 0            | 0            | 0            | 1            | 0            | 0            |              |
| 0            | 0            | 0            | 25           | 0            | 0            | 0            | 100          | 80           | 0            | 0            | 80           |              |
| 0            | 0            | 0            | 22           | 0            | 0            | 0            | 0            | 14           | 9            | 0            | 73           |              |
| 0            | 0            | 0            | 13           | 0            | 0            | 0            | 0            | 0            | 15           | 0            | 40           |              |
| 0            | 0            | 0            | 27           | 0            | 0            | 0            | 0            | 0            | 0            | 0            | 0            |              |
| 0            | 0            | 0            | 50           | 0            | 0            | 0            | 0            | 0            | 0            | 0            | 0            |              |
| 0            | 0            | 0            | 0            | 0            | 0            | 0            | 0            | 0            | 0            | 0            | 0            |              |
| 0            | 0            | 0            | 14           | 0            | 0            | 0            | 0            | 0            | 0            | 0            | 0            |              |
| 0            | 0            | 0            | 17           | 0            | 0            | 0            | 13           | 0            | 6            | 0            | 0            |              |
| 0            | 0            | 5            | 17           | 0            | 0            | 0            | 0            | 0            | 18           | 0            | 0            |              |
| 0            | 0            | 0            | 56           | 0            | 0            | 0            | 75           | 0            | 0            | 0            | 0            |              |
| 0            | 0            | 0            | 0            | 0            | 0            | 0            | 0            | 0            | 50           | 0            | 0            |              |
| 0            | 0            | 0            | 0            | 0            | 0            | 0            | 0            | 0            | 0            | 0            | 0            |              |
| 0            | 0            | 0            | 0            | 0            | 25           | 0            | 0            | 33           | 0            | 0            | 0            |              |
| 0            | 0            | 0            | 0            | 0            | 0            | 4            | 0            | 0            | 0            | 0            | 0            |              |
| 0            | 0            | 0            | 20           | 0            | 0            | 0            | 0            | 0            | 0            | 0            | 0            |              |
| 0            | 0            | 0            | 0            | 0            | 0            | 0            | 0            | 0            | 0            | 0            | 20           |              |
| 0            | 0            | 0            | 0            | 0            | 0            | 0            | 0            | 0            | 0            | 0            | 67           |              |
| 0            | 0            | 0            | 0            | 0            | 0            | 0            | 0            | 0            | 0            | 0            | 10           |              |
| 0            | 0            | 0            | 10           | 0            | 0            | 0            | 0            | 0            | 0            | 0            | 0            |              |
| 0            | 0            | 0            | 0            | 0            | 0            | 0            | 0            | 0            | 0            | 0            | 0            |              |
| 0            | 0            | 0            | 0            | 0            | 0            | 0            | 0            | 0            | 0            | 0            | 0            |              |
| 0            | 0            | 0            | 0            | 0            | 0            | 0            | 0            | 0            | 0            | 0            | 0            |              |
| 0            | 0            | 0            | 9            | 0            | 7            | 0            | 7            | 0            | 0            | 0            | 0            |              |
| 0            | 0            | 0            | 0            | 0            | 0            | 0            | 14           | 0            | 0            | 0            | 0            |              |
| 0            | 0            | 0            | 0            | 0            | 0            | 0            | 0            | 0            | 0            | 0            | 0            |              |
| 0            | 0            | 0            | 0            | 0            | 0            | 0            | 0            | 0            | 0            | 0            | 0            |              |
| 0            | 0            | 0            | 0            | 0            | 0            | 0            | 0            | 0            | 10           | 0            | 0            |              |
| 0            | 0            | 0            | 0            | 0            | 0            | 0            | 0            | 0            | 3            | 0            | 42           |              |
| 0            | 0            | 0            | 0            | 0            | 0            | 0            | 0            | 0            | 0            | 0            | 15           |              |
| 0            | 0            | 0            | 1            | 0            | 0            | 0            | 0            | 0            | 0            | 0            | 0            |              |
| 0            | 0            | 0            | 0            | 0            | 0            | 0            | 0            | 2            | 0            | 0            | 0            |              |
| 0            | 0            | 0            | 0            | 0            | 0            | 0            | 0            | 5            | 0            | 0            | 0            |              |
| 0            | 0            | 0            | 0            | 0            | 0            | 0            | 0            | 0            | 3            | 0            | 0            |              |
| 0            | 0            | 0            | 1            | 0            | 0            | 0            | 0            | 0            | 0            | 0            | 0            |              |
| 0            | 0            | 0            | 0            | 0            | 0            | 0            | 0            | 1            | 0            | 0            | 0            |              |
| 0            | 0            | 0            | 0            | 0            | 0            | 0            | 0            | 0            | 0            | 0            | 0            |              |
| 0            | 0            | 0            | 0            | 0            | 0            | 0            | 0            | 0            | 0            | 0            | 0            |              |
| 0            | 0            | 0            | 0            | 0            | 0            | 0            | 0            | 0            | 0            | 0            | 0            |              |
| 0            | 0            | 0            | 0            | 0            | 0            | 0            | 0            | 0            | 0            | 0            | 0            |              |
| 0            | 0            | 0            | 0            | 0            | 0            | 3            | 5            | 0            | 0            | 0            | 0            |              |
| 1.0E+00      | 3.8E-01      | 3.7E-01      | 6.8E-02      | 8.5E-02      | 7.0E-01      | 4.9E-01      | 8.5E-02      | 1.5E-01      | 1.3E-01      | 3.1E-01      | 6.9E-01      |              |
| 9.7E-02      | 4.5E-01      | 4.3E-01      | 3.3E-01      | 1.6E-01      | 2.1E-01      | 2.0E-01      | 2.3E-01      | 3.5E-01      | 3.2E-01      | 2.6E-01      | 2.5E-01      |              |
| 0            | 3            | 2            | 2            | 2            | 0            | 0            | 2            | 2            | 2            | 2            | 2            |              |
| 0.0E+00      | -5.7E-01     | -2.6E+00     | -5.0E-01     | 4.9E-02      | 0.0E+00      | 0.0E+00      | -1.3E-01     | 8.2E-01      | 5.6E-02      | 5.1E-01      | 5.1E-01      |              |
| 0.0E+00      |              |

| Specific_Low |
|--------------|--------------|--------------|--------------|--------------|--------------|--------------|--------------|--------------|--------------|--------------|--------------|
| At_F0260     | At_F0311     | At_F0395     | At_F0413     | At_F0439     | At_F0523     | At_F0568     | At_F0571     | At_F0610     | At_F0632     | At_F0638     | At_F0642     |
| -            | -            | -            | -            | -            | -            | -            | -            | -            | bm           | -            | bm           |
| 5.2E-03      | 2.5E-03      | 2.3E-03      | 3.0E-03      | 1.0E-02      | 9.6E-03      | 1.3E-03      | 1.4E-03      | 1.3E-02      | 2.3E-03      | 5.3E-03      | 1.4E-02      |
| 4.0E-03      | 3.0E-03      | 3.0E-03      | 3.1E-03      | 2.3E-03      | 7.7E-03      | 1.1E-03      | 1.1E-03      | 4.6E-03      | 2.4E-03      | 8.0E-03      | 8.9E-03      |
| 2.0E-03      | 1.7E-03      | 2.1E-03      | 7.2E-03      | 2.7E-03      | 1.3E-02      | 3.9E-03      | 1.0E-03      | 6.0E-03      | 3.2E-03      | 3.3E-03      | 2.1E-03      |
| 4.6E-02      | 4.4E-02      | 4.3E-02      | 5.9E-02      | 1.6E-01      | 1.5E-01      | 3.1E-02      | 4.3E-02      | 1.6E-01      | 3.8E-02      | 7.2E-02      | 1.3E-01      |
| 6.0E-02      | 3.2E-02      | 3.6E-02      | 4.4E-02      | 6.1E-02      | 6.9E-02      | 3.4E-02      | 2.2E-02      | 5.5E-02      | 3.9E-02      | 4.5E-02      | 1.1E-01      |
| 4.3E-02      | 3.9E-02      | 4.1E-02      | 5.9E-02      | 5.2E-02      | 1.2E-01      | 5.2E-02      | 2.9E-02      | 5.6E-02      | 5.1E-02      | 6.8E-02      | 4.3E-02      |
| 0.0E+00      | 1.7E+01      | 5.5E+00      | 9.6E+00      | 2.6E+00      | 0.0E+00      | 0.0E+00      | 1.2E+01      | 5.3E+00      | 3.5E+01      | 1.0E+01      | 3.0E+01      |
| 0            | 2            | 0            | 0            | 0            | 0            | 0            | 5            | 0            | 0            | 0            | 4            |
| 0            | 0            | 0            | 0            | 0            | 0            | 0            | 3            | 1            | 0            | 0            | 1            |
| 0            | 0            | 0            | 0            | 100          | 100          | 0            | 0            | 100          | 100          | 0            | 75           |
| 0            | 0            | 11           | 0            | 33           | 36           | 0            | 0            | 56           | 71           | 0            | 22           |
| 0            | 0            | 0            | 0            | 50           | 0            | 0            | 0            | 33           | 0            | 0            | 50           |
| 0            | 0            | 45           | 8            | 0            | 0            | 0            | 0            | 0            | 0            | 15           | 13           |
| 0            | 0            | 0            | 57           | 0            | 0            | 0            | 40           | 0            | 0            | 0            | 100          |
| 0            | 0            | 33           | 0            | 0            | 0            | 0            | 83           | 0            | 77           | 20           | 60           |
| 0            | 18           | 0            | 0            | 0            | 0            | 0            | 8            | 0            | 35           | 6            | 50           |
| 0            | 32           | 0            | 18           | 5            | 0            | 0            | 0            | 0            | 32           | 18           | 13           |
| 0            | 8            | 3            | 18           | 7            | 0            | 0            | 0            | 20           | 50           | 0            | 67           |
| 0            | 40           | 3            | 11           | 0            | 0            | 0            | 0            | 43           | 0            | 0            | 0            |
| 0            | 0            | 0            | 0            | 0            | 0            | 0            | 0            | 0            | 0            | 0            | 0            |
| 50           | 0            | 0            | 0            | 0            | 0            | 0            | 0            | 0            | 0            | 0            | 0            |
| 0            | 0            | 10           | 0            | 0            | 20           | 0            | 0            | 0            | 0            | 0            | 0            |
| 0            | 0            | 50           | 44           | 0            | 0            | 0            | 0            | 0            | 0            | 0            | 0            |
| 50           | 0            | 0            | 86           | 0            | 0            | 0            | 0            | 0            | 0            | 0            | 0            |
| 0            | 14           | 0            | 0            | 100          | 50           | 0            | 0            | 100          | 11           | 0            | 0            |
| 0            | 0            | 0            | 0            | 50           | 0            | 0            | 0            | 36           | 0            | 0            | 0            |
| 0            | 0            | 0            | 0            | 0            | 0            | 0            | 0            | 33           | 0            | 0            | 6            |
| 0            | 0            | 0            | 0            | 0            | 0            | 0            | 0            | 0            | 0            | 0            | 0            |
| 0            | 0            | 0            | 0            | 0            | 0            | 0            | 0            | 0            | 0            | 0            | 0            |
| 0            | 0            | 0            | 0            | 0            | 0            | 0            | 33           | 0            | 0            | 0            | 0            |
| 0            | 0            | 0            | 0            | 0            | 0            | 0            | 0            | 0            | 0            | 0            | 11           |
| 0            | 0            | 2            | 0            | 0            | 0            | 0            | 0            | 0            | 0            | 0            | 0            |
| 0            | 4            | 0            | 5            | 0            | 0            | 0            | 0            | 0            | 0            | 0            | 0            |
| 0            | 0            | 0            | 0            | 0            | 0            | 0            | 0            | 0            | 0            | 0            | 0            |
| 0            | 0            | 0            | 0            | 0            | 0            | 0            | 0            | 0            | 0            | 0            | 0            |
| 0            | 0            | 0            | 0            | 0            | 0            | 0            | 0            | 0            | 0            | 0            | 0            |
| 0            | 0            | 0            | 0            | 0            | 0            | 0            | 0            | 0            | 0            | 0            | 0            |
| 0            | 0            | 0            | 0            | 0            | 0            | 0            | 0            | 0            | 0            | 0            | 0            |
| 0            | 3            | 0            | 0            | 35           | 13           | 0            | 0            | 33           | 0            | 4            | 0            |
| 0            | 0            | 0            | 0            | 2            | 16           | 2            | 0            | 2            | 0            | 0            | 0            |
| 0            | 0            | 0            | 0            | 0            | 2            | 0            | 0            | 1            | 0            | 0            | 0            |
| 0            | 0            | 0            | 2            | 0            | 0            | 0            | 0            | 0            | 0            | 0            | 0            |
| 0            | 0            | 0            | 0            | 0            | 0            | 0            | 0            | 0            | 0            | 0            | 4            |
| 0            | 0            | 0            | 0            | 0            | 0            | 0            | 16           | 0            | 0            | 0            | 0            |
| 0            | 0            | 0            | 0            | 0            | 4            | 0            | 0            | 0            | 0            | 0            | 0            |
| 0            | 0            | 0            | 1            | 0            | 0            | 0            | 0            | 0            | 0            | 0            | 0            |
| 0            | 0            | 7            | 0            | 0            | 0            | 0            | 0            | 2            | 0            | 0            | 3            |
| 0            | 0            | 0            | 0            | 0            | 0            | 0            | 0            | 0            | 0            | 0            | 0            |
| 0            | 0            | 0            | 0            | 0            | 0            | 0            | 0            | 0            | 0            | 0            | 0            |
| 0            | 0            | 0            | 0            | 0            | 0            | 0            | 0            | 0            | 0            | 0            | 0            |
| 0            | 0            | 0            | 0            | 0            | 0            | 0            | 0            | 0            | 0            | 0            | 0            |
| 0            | 0            | 0            | 0            | 0            | 0            | 0            | 0            | 0            | 0            | 0            | 0            |
| 0            | 0            | 0            | 4            | 0            | 0            | 0            | 0            | 0            | 0            | 0            | 0            |
| 1.5E-01      | 7.9E-02      | 7.2E-01      | 1.8E-01      | 2.5E-01      | 7.2E-01      | 2.1E-01      | 7.5E-01      | 7.2E-01      | 2.5E-01      | 6.8E-02      | 2.0E+00      |
| 3.2E-01      | 3.8E-01      | 6.6E-01      | 4.5E-01      | 4.0E-01      | 9.1E-01      | 1.5E+00      | 2.0E-01      | 2.1E-01      | 2.4E-01      | 3.7E-01      | 3.3E-01      |
| 3            | 3            | 2            | 2            | 2            | 2            | 0            | 3            | 2            | 2            | 2            | 2            |
| 0.0E+00      | 3.1E-01      | 5.6E-01      | -1.5E-01     | 6.1E-01      | 5.5E-01      | 0.0E+00      | 2.4E-01      | 7.9E-01      | 1.6E-01      | -1.5E-01     | -3.8E-01     |
| 0.0E+00      |

| Specific_Low | Specific_Low | Specific_Low | Specific_Rare |
|--------------|--------------|--------------|---------------|---------------|---------------|---------------|---------------|---------------|---------------|---------------|
| Atpeg0058    | Atpeg0084    | Atpeg0110    | At_F0005      | At_F0007      | At_F0012      | At_F0014      | At_F0023      | At_F0032      | At_F0034      | At_F0037      |
| NA           | NA           | NA           | -             | -             | -             | -             | -             | -             | -             | -             |
| 3.3E-03      | 5.5E-03      | 5.0E-03      | 5.0E-03       | 1.4E-02       | 1.9E-03       | 1.7E-02       | 2.7E-03       | 2.9E-03       | 5.4E-03       | 7.4E-03       |
| 3.0E-03      | 7.1E-03      | 8.4E-03      | 4.2E-03       | 6.5E-03       | 3.1E-03       | 6.8E-03       | 4.5E-03       | 3.0E-03       | 4.7E-03       | 1.4E-03       |
| 2.9E-03      | 3.1E-03      | 4.3E-03      | 5.6E-03       | 4.4E-03       | 4.0E-03       | 3.5E-03       | 6.0E-03       | 1.9E-03       | 9.2E-03       | 9.6E-03       |
| 4.5E-02      | 7.9E-02      | 1.1E-01      | 1.3E-01       | 9.4E-02       | 5.3E-02       | 1.3E-01       | 7.4E-02       | 4.5E-02       | 5.4E-02       | 6.0E-02       |
| 7.0E-02      | 6.0E-02      | 1.1E-01      | 8.0E-02       | 6.0E-02       | 5.1E-02       | 7.4E-02       | 5.1E-02       | 6.1E-02       | 5.4E-02       | 2.3E-02       |
| 6.2E-02      | 4.2E-02      | 9.6E-02      | 1.5E-01       | 6.0E-02       | 5.6E-02       | 1.2E-01       | 8.5E-02       | 4.3E-02       | 8.2E-02       | 6.3E-02       |
| 0.0E+00      | 0.0E+00      | 0.0E+00      | 0.0E+00       | 6.1E+00       | 3.6E+01       | 0.0E+00       | 3.7E+01       | 2.3E+01       | 0.0E+00       | 3.8E+00       |
| 0            | 0            | 0            | 0             | 4             | 57            | 0             | 36            | 9             | 0             | 0             |
| 1            | 0            | 0            | 0             | 5             | 2             | 1             | 1             | 7             | 0             | 0             |
| 0            | 0            | 0            | 0             | 0             | 0             | 100           | 0             | 0             | 0             | 0             |
| 0            | 0            | 0            | 0             | 0             | 0             | 0             | 0             | 38            | 0             | 0             |
| 0            | 0            | 0            | 0             | 0             | 0             | 0             | 0             | 21            | 0             | 7             |
| 0            | 0            | 0            | 0             | 0             | 0             | 0             | 0             | 54            | 0             | 0             |
| 0            | 0            | 0            | 0             | 0             | 0             | 0             | 0             | 67            | 0             | 0             |
| 10           | 0            | 0            | 0             | 0             | 0             | 0             | 100           | 0             | 0             | 0             |
| 6            | 0            | 0            | 0             | 0             | 31            | 0             | 44            | 36            | 0             | 0             |
| 0            | 0            | 0            | 0             | 24            | 48            | 0             | 47            | 18            | 0             | 15            |
| 0            | 0            | 0            | 0             | 0             | 67            | 0             | 22            | 50            | 0             | 0             |
| 0            | 0            | 0            | 0             | 0             | 75            | 0             | 0             | 0             | 0             | 0             |
| 0            | 0            | 0            | 100           | 0             | 0             | 0             | 0             | 0             | 0             | 0             |
| 0            | 0            | 0            | 11            | 0             | 0             | 0             | 56            | 0             | 0             | 0             |
| 0            | 0            | 18           | 0             | 0             | 0             | 14            | 33            | 0             | 0             | 0             |
| 0            | 0            | 0            | 0             | 0             | 0             | 17            | 9             | 7             | 0             | 0             |
| 0            | 0            | 0            | 60            | 0             | 0             | 25            | 0             | 0             | 0             | 0             |
| 0            | 0            | 0            | 0             | 0             | 0             | 100           | 0             | 0             | 0             | 0             |
| 0            | 0            | 0            | 0             | 0             | 0             | 0             | 0             | 0             | 0             | 0             |
| 0            | 0            | 0            | 0             | 0             | 0             | 0             | 0             | 14            | 0             | 0             |
| 0            | 0            | 0            | 0             | 25            | 0             | 0             | 0             | 0             | 0             | 0             |
| 0            | 0            | 0            | 0             | 0             | 0             | 0             | 0             | 0             | 0             | 0             |
| 0            | 0            | 0            | 0             | 0             | 0             | 0             | 33            | 0             | 0             | 0             |
| 0            | 0            | 0            | 0             | 0             | 36            | 0             | 25            | 0             | 0             | 0             |
| 0            | 0            | 0            | 0             | 5             | 33            | 0             | 24            | 14            | 0             | 0             |
| 0            | 0            | 0            | 0             | 0             | 71            | 0             | 10            | 0             | 0             | 0             |
| 0            | 0            | 0            | 0             | 0             | 0             | 0             | 0             | 0             | 0             | 0             |
| 0            | 0            | 0            | 0             | 0             | 0             | 0             | 0             | 0             | 0             | 0             |
| 0            | 0            | 0            | 0             | 8             | 0             | 0             | 30            | 0             | 0             | 0             |
| 0            | 0            | 14           | 0             | 0             | 0             | 0             | 0             | 0             | 0             | 0             |
| 0            | 0            | 0            | 11            | 0             | 0             | 13            | 0             | 0             | 0             | 0             |
| 0            | 0            | 0            | 33            | 0             | 0             | 0             | 0             | 0             | 0             | 0             |
| 0            | 0            | 0            | 0             | 0             | 0             | 0             | 0             | 0             | 0             | 0             |
| 0            | 0            | 0            | 2             | 0             | 0             | 0             | 0             | 0             | 0             | 2             |
| 0            | 0            | 0            | 0             | 0             | 0             | 0             | 0             | 14            | 0             | 0             |
| 0            | 0            | 0            | 2             | 0             | 0             | 0             | 0             | 0             | 0             | 0             |
| 0            | 0            | 0            | 0             | 0             | 0             | 0             | 0             | 0             | 0             | 0             |
| 0            | 0            | 0            | 0             | 0             | 0             | 3             | 0             | 0             | 0             | 0             |
| 0            | 0            | 0            | 0             | 0             | 0             | 0             | 2             | 0             | 0             | 0             |
| 0            | 0            | 0            | 0             | 11            | 0             | 0             | 0             | 12            | 0             | 0             |
| 0            | 0            | 0            | 0             | 0             | 6             | 0             | 0             | 0             | 0             | 0             |
| 1            | 0            | 0            | 0             | 0             | 0             | 0             | 0             | 0             | 0             | 0             |
| 0            | 0            | 0            | 31            | 0             | 0             | 40            | 0             | 0             | 0             | 0             |
| 2            | 0            | 0            | 0             | 1             | 0             | 6             | 2             | 0             | 0             | 0             |
| 0            | 0            | 6            | 0             | 1             | 0             | 0             | 3             | 0             | 0             | 0             |
| 0            | 0            | 0            | 2             | 0             | 0             | 4             | 0             | 0             | 0             | 0             |
| 0            | 0            | 0            | 0             | 0             | 0             | 62            | 0             | 0             | 0             | 0             |
| 2.7E-01      | 3.4E-01      | 2.2E-01      | 4.9E-01       | 2.0E-01       | 1.2E-01       | 2.5E-01       | 1.9E-01       | 4.7E-02       | 3.5E-01       | 9.9E-02       |
| 3.1E-01      | 2.3E-01      | 1.2E-01      | 2.4E-01       | 4.8E-02       | 1.9E-01       | 5.6E-01       | 1.9E-01       | 1.1E-01       | 5.1E-01       | 6.2E-01       |
| 1            | 2            | 2            | 2             | 2             | 2             | 3             | 2             | 2             | 3             | 2             |
| 0.0E+00      | 7.8E-01      | 4.8E-01      | -1.3E+00      | -1.1E-01      | -1.2E+00      | 2.8E-01       | 6.8E-02       | 2.1E-01       | 2.2E-01       | 5.7E-01       |
| 0.0E+00      | 0.0E+00      | 0.0E+00      | 1.3E+01       | 1.5E+01       | 1.2E+01       | 4.2E+00       | 1.2E+01       | 2.3E+00       | 4.3E+00       | 4.6E+00       |



| Specific_Rare |
|---------------|---------------|---------------|---------------|---------------|---------------|---------------|---------------|---------------|---------------|---------------|---------------|
| At_F0038      | At_F0044      | At_F0049      | At_F0056      | At_F0060      | At_F0061      | At_F0066      | At_F0082      | At_F0092      | At_F0093      | At_F0098      |               |
| -             | -             | -             | -             | bm            | -             | -             | -             | -             | -             | -             | -             |
| 1.6E-03       | 2.2E-03       | 1.1E-02       | 9.0E-03       | 1.7E-03       | 1.7E-03       | 8.8E-03       | 2.2E-03       | 1.1E-02       | 6.7E-03       | 7.5E-03       |               |
| 9.4E-04       | 1.3E-03       | 3.0E-03       | 9.7E-03       | 6.8E-04       | 2.8E-03       | 5.4E-03       | 2.8E-03       | 9.8E-03       | 1.1E-02       | 9.4E-03       |               |
| 2.1E-03       | 4.2E-03       | 7.5E-03       | 1.2E-02       | 7.9E-04       | 3.8E-03       | 2.5E-03       | 3.5E-03       | 1.5E-02       | 7.7E-03       | 2.9E-03       |               |
| 4.4E-02       | 5.2E-02       | 2.0E-01       | 1.2E-01       | 4.5E-02       | 2.9E-02       | 1.2E-01       | 4.0E-02       | 9.7E-02       | 1.1E-01       | 5.9E-02       |               |
| 2.7E-02       | 3.8E-02       | 5.8E-02       | 1.2E-01       | 4.2E-02       | 4.3E-02       | 1.0E-01       | 3.1E-02       | 9.6E-02       | 9.0E-02       | 9.5E-02       |               |
| 4.6E-02       | 5.3E-02       | 1.5E-01       | 1.4E-01       | 4.4E-02       | 4.0E-02       | 6.3E-02       | 6.8E-02       | 8.8E-02       | 8.9E-02       | 6.2E-02       |               |
| 0.0E+00       | 8.0E+00       | 3.8E+00       | 2.6E+00       | 2.7E+01       | 2.0E+01       | 0.0E+00       | 4.3E+00       | 1.2E+01       | 1.1E+01       | 2.8E+01       |               |
| 0             | 0             | 0             | 0             | 0             | 35            | 0             | 0             | 9             | 5             | 50            |               |
| 0             | 1             | 0             | 0             | 2             | 8             | 0             | 0             | 0             | 1             | 7             |               |
| 0             | 0             | 0             | 40            | 0             | 0             | 0             | 0             | 50            | 0             | 0             |               |
| 0             | 0             | 0             | 0             | 0             | 40            | 0             | 0             | 0             | 0             | 0             |               |
| 0             | 0             | 17            | 0             | 0             | 0             | 0             | 0             | 0             | 0             | 0             |               |
| 0             | 0             | 0             | 0             | 0             | 0             | 0             | 0             | 0             | 0             | 0             |               |
| 0             | 0             | 0             | 0             | 0             | 0             | 0             | 0             | 0             | 0             | 100           |               |
| 0             | 0             | 0             | 0             | 40            | 0             | 0             | 0             | 0             | 0             | 100           |               |
| 0             | 0             | 0             | 14            | 29            | 44            | 0             | 0             | 0             | 6             | 55            |               |
| 0             | 8             | 0             | 0             | 32            | 35            | 0             | 0             | 0             | 6             | 7             |               |
| 0             | 29            | 19            | 0             | 8             | 8             | 0             | 13            | 33            | 29            | 0             |               |
| 0             | 0             | 0             | 0             | 67            | 0             | 0             | 67            | 71            | 8             | 0             |               |
| 0             | 40            | 67            | 0             | 0             | 0             | 0             | 0             | 0             | 0             | 0             |               |
| 0             | 0             | 0             | 0             | 0             | 0             | 0             | 0             | 0             | 0             | 0             |               |
| 0             | 0             | 0             | 0             | 0             | 0             | 0             | 20            | 0             | 0             | 0             |               |
| 0             | 0             | 29            | 0             | 0             | 0             | 0             | 0             | 50            | 0             | 0             |               |
| 0             | 0             | 0             | 0             | 43            | 0             | 0             | 0             | 100           | 0             | 0             |               |
| 0             | 0             | 0             | 0             | 0             | 0             | 0             | 0             | 20            | 0             | 0             |               |
| 0             | 0             | 0             | 0             | 0             | 0             | 0             | 0             | 0             | 0             | 0             |               |
| 0             | 0             | 0             | 0             | 0             | 0             | 0             | 0             | 0             | 0             | 0             |               |
| 0             | 0             | 0             | 0             | 0             | 0             | 0             | 0             | 0             | 0             | 67            |               |
| 0             | 0             | 0             | 0             | 0             | 0             | 0             | 0             | 0             | 0             | 100           |               |
| 0             | 0             | 0             | 0             | 0             | 25            | 0             | 0             | 0             | 0             | 60            |               |
| 0             | 0             | 0             | 0             | 0             | 29            | 0             | 0             | 0             | 0             | 0             |               |
| 0             | 0             | 0             | 0             | 0             | 0             | 0             | 0             | 7             | 10            | 0             |               |
| 0             | 0             | 0             | 0             | 0             | 0             | 0             | 0             | 29            | 0             | 0             |               |
| 0             | 0             | 0             | 0             | 0             | 0             | 0             | 0             | 0             | 0             | 0             |               |
| 0             | 0             | 0             | 0             | 0             | 0             | 0             | 0             | 0             | 0             | 0             |               |
| 0             | 0             | 0             | 0             | 0             | 0             | 0             | 83            | 0             | 0             | 0             |               |
| 0             | 0             | 0             | 0             | 0             | 0             | 0             | 0             | 0             | 0             | 0             |               |
| 0             | 0             | 0             | 0             | 0             | 0             | 0             | 0             | 0             | 0             | 0             |               |
| 0             | 0             | 0             | 0             | 0             | 0             | 0             | 0             | 2             | 0             | 0             |               |
| 0             | 0             | 0             | 0             | 0             | 0             | 0             | 0             | 0             | 0             | 0             |               |
| 0             | 0             | 0             | 0             | 0             | 0             | 0             | 0             | 0             | 0             | 46            |               |
| 0             | 3             | 0             | 0             | 5             | 0             | 0             | 0             | 0             | 0             | 37            |               |
| 0             | 0             | 0             | 0             | 0             | 8             | 0             | 0             | 0             | 0             | 4             |               |
| 0             | 0             | 0             | 0             | 2             | 7             | 0             | 0             | 0             | 0             | 0             |               |
| 0             | 0             | 0             | 0             | 0             | 0             | 0             | 0             | 0             | 3             | 0             |               |
| 0             | 0             | 0             | 0             | 0             | 0             | 0             | 0             | 0             | 0             | 0             |               |
| 0             | 0             | 0             | 0             | 0             | 5             | 0             | 0             | 0             | 0             | 0             |               |
| 0             | 0             | 0             | 0             | 0             | 0             | 0             | 0             | 2             | 0             | 0             |               |
| 0             | 0             | 0             | 0             | 0             | 0             | 0             | 0             | 0             | 0             | 0             |               |
| 0             | 0             | 16            | 0             | 0             | 0             | 0             | 36            | 0             | 0             | 3             |               |
| 0             | 0             | 0             | 0             | 0             | 0             | 0             | 0             | 0             | 0             | 0             |               |
| 1.4E-01       | 7.4E-02       | 3.7E-01       | 1.9E+00       | 8.7E-02       | 1.1E-01       | 7.7E-01       | 5.0E-02       | 1.8E-01       | 1.4E-01       | 8.4E-01       |               |
| 2.3E-01       | 4.1E-01       | 1.5E-01       | 1.8E-01       | 1.1E-01       | 1.9E-01       | 1.7E-01       | 3.6E-01       | 3.3E-01       | 5.8E-02       | 3.3E-01       |               |
| 2             | 2             | 2             | 0             | 0             | 2             | 0             | 2             | 2             | 2             | 0             |               |
| 9.7E-01       | 7.3E-01       | -2.8E-01      | 0.0E+00       | 0.0E+00       | -2.2E+00      | 0.0E+00       | 2.8E-02       | 3.8E-01       | -7.0E-02      | 0.0E+00       |               |
| 9.6E+00       | 2.0E+00       | 2.0E+00       | 1.1E+01       | 1.0E+01       | 6.1E+00       | 4.2E+00       | 4.4E+00       | 2.8E+00       | 1.9E+00       | 7.9E+00       |               |

| Specific_Rare |
|---------------|---------------|---------------|---------------|---------------|---------------|---------------|---------------|---------------|---------------|---------------|---------------|
| At_F0099      | At_F0100      | At_F0106      | At_F0107      | At_F0111      | At_F0121      | At_F0126      | At_F0127      | At_F0135      | At_F0137      | At_F0141      |               |
| -             | -             | -             | -             | -             | -             | bm            | -             | -             | -             | -             |               |
| 9.4E-03       | 1.9E-03       | 6.5E-03       | 8.9E-04       | 1.3E-03       | 2.0E-03       | 9.3E-04       | 6.4E-03       | 4.9E-03       | 2.0E-03       | 1.2E-02       |               |
| 6.2E-03       | 3.3E-03       | 2.1E-03       | 1.7E-03       | 1.5E-03       | 1.5E-03       | 5.7E-03       | 8.9E-03       | 6.5E-03       | 5.1E-03       | 7.4E-03       |               |
| 6.6E-03       | 9.2E-04       | 7.0E-03       | 3.0E-03       | 1.5E-03       | 5.2E-03       | 6.6E-03       | 4.4E-03       | 1.0E-02       | 8.8E-03       | 8.6E-03       |               |
| 8.9E-02       | 4.5E-02       | 6.1E-02       | 2.7E-02       | 4.6E-02       | 3.2E-02       | 2.0E-02       | 1.3E-01       | 6.5E-02       | 4.2E-02       | 1.2E-01       |               |
| 6.8E-02       | 4.2E-02       | 6.0E-02       | 3.9E-02       | 3.9E-02       | 2.5E-02       | 5.8E-02       | 6.2E-02       | 6.3E-02       | 6.0E-02       | 6.0E-02       |               |
| 1.1E-01       | 2.7E-02       | 9.4E-02       | 5.3E-02       | 2.6E-02       | 6.2E-02       | 5.2E-02       | 6.5E-02       | 6.5E-02       | 8.5E-02       | 8.8E-02       |               |
| 3.5E+00       | 0.0E+00       | 3.4E+00       | 0.0E+00       | 9.6E+00       | 0.0E+00       | 2.7E+01       | 0.0E+00       | 0.0E+00       | 6.0E+00       | 0.0E+00       |               |
| 0             | 0             | 0             | 0             | 0             | 0             | 16            | 0             | 0             | 0             | 0             |               |
| 1             | 0             | 0             | 0             | 0             | 0             | 3             | 0             | 0             | 0             | 0             |               |
| 80            | 0             | 0             | 0             | 0             | 0             | 0             | 50            | 0             | 25            | 0             |               |
| 0             | 0             | 12            | 0             | 0             | 0             | 0             | 0             | 0             | 0             | 0             |               |
| 0             | 0             | 0             | 0             | 0             | 0             | 0             | 80            | 0             | 0             | 0             |               |
| 0             | 0             | 0             | 0             | 0             | 0             | 10            | 0             | 0             | 0             | 0             |               |
| 0             | 0             | 0             | 0             | 0             | 0             | 0             | 0             | 0             | 0             | 0             |               |
| 0             | 0             | 20            | 0             | 0             | 0             | 0             | 0             | 0             | 60            | 0             |               |
| 0             | 0             | 0             | 0             | 0             | 0             | 21            | 0             | 0             | 0             | 0             |               |
| 0             | 0             | 0             | 0             | 0             | 0             | 25            | 0             | 0             | 0             | 0             |               |
| 0             | 0             | 0             | 0             | 38            | 0             | 62            | 0             | 0             | 0             | 0             |               |
| 60            | 0             | 0             | 0             | 67            | 0             | 17            | 0             | 0             | 0             | 0             |               |
| 0             | 0             | 0             | 0             | 0             | 0             | 0             | 0             | 0             | 0             | 0             |               |
| 33            | 0             | 0             | 0             | 0             | 0             | 0             | 0             | 0             | 0             | 17            |               |
| 38            | 0             | 25            | 0             | 11            | 0             | 0             | 14            | 0             | 0             | 0             |               |
| 14            | 0             | 0             | 0             | 10            | 0             | 0             | 0             | 0             | 20            | 0             |               |
| 17            | 0             | 0             | 0             | 75            | 0             | 0             | 0             | 25            | 25            | 0             |               |
| 0             | 0             | 0             | 0             | 0             | 0             | 0             | 100           | 0             | 0             | 0             |               |
| 0             | 0             | 0             | 0             | 0             | 0             | 0             | 0             | 0             | 0             | 0             |               |
| 0             | 0             | 0             | 0             | 0             | 0             | 0             | 0             | 0             | 0             | 0             |               |
| 0             | 0             | 0             | 0             | 0             | 0             | 0             | 0             | 0             | 0             | 0             |               |
| 0             | 0             | 0             | 0             | 0             | 0             | 0             | 0             | 0             | 0             | 0             |               |
| 0             | 0             | 0             | 0             | 0             | 0             | 24            | 0             | 0             | 0             | 0             |               |
| 0             | 0             | 0             | 0             | 0             | 0             | 0             | 0             | 0             | 0             | 0             |               |
| 0             | 0             | 0             | 0             | 0             | 0             | 0             | 0             | 0             | 0             | 0             |               |
| 0             | 0             | 0             | 0             | 0             | 0             | 0             | 0             | 0             | 0             | 0             |               |
| 0             | 0             | 0             | 0             | 0             | 0             | 0             | 0             | 0             | 0             | 0             |               |
| 20            | 0             | 0             | 0             | 0             | 0             | 0             | 0             | 0             | 0             | 18            |               |
| 71            | 0             | 0             | 0             | 0             | 0             | 0             | 0             | 0             | 0             | 0             |               |
| 67            | 0             | 0             | 0             | 0             | 0             | 0             | 0             | 0             | 0             | 0             |               |
| 0             | 0             | 0             | 0             | 0             | 0             | 0             | 0             | 0             | 0             | 0             |               |
| 0             | 0             | 0             | 0             | 0             | 0             | 0             | 0             | 0             | 0             | 0             |               |
| 0             | 0             | 0             | 0             | 10            | 2             | 0             | 7             | 0             | 0             | 0             |               |
| 0             | 0             | 0             | 0             | 0             | 0             | 0             | 0             | 0             | 0             | 0             |               |
| 2             | 0             | 0             | 0             | 0             | 0             | 0             | 0             | 0             | 0             | 0             |               |
| 0             | 0             | 0             | 0             | 0             | 0             | 0             | 0             | 0             | 4             | 0             |               |
| 0             | 0             | 0             | 0             | 0             | 0             | 0             | 0             | 0             | 0             | 0             |               |
| 0             | 0             | 0             | 0             | 0             | 0             | 0             | 0             | 0             | 0             | 0             |               |
| 0             | 0             | 0             | 0             | 0             | 0             | 5             | 0             | 0             | 0             | 0             |               |
| 0             | 0             | 0             | 0             | 0             | 0             | 0             | 0             | 0             | 0             | 0             |               |
| 7             | 0             | 0             | 0             | 0             | 0             | 0             | 0             | 0             | 0             | 0             |               |
| 0             | 0             | 4             | 0             | 0             | 0             | 0             | 3             | 0             | 0             | 0             |               |
| 12            | 0             | 0             | 0             | 0             | 0             | 0             | 0             | 2             | 0             | 11            |               |
| 8             | 0             | 0             | 0             | 0             | 0             | 0             | 0             | 0             | 0             | 0             |               |
| 0             | 0             | 0             | 0             | 0             | 0             | 0             | 0             | 0             | 0             | 0             |               |
| 0             | 0             | 0             | 0             | 0             | 0             | 0             | 0             | 0             | 0             | 0             |               |
| 1.1E+00       | 7.2E-02       | 1.2E-01       | 7.8E-02       | 7.1E-02       | 3.9E-01       | 6.3E-02       | 2.4E-01       | 9.9E-01       | 1.0E+00       | 5.8E-02       |               |
| 2.3E-01       | 3.1E-01       | 2.4E-01       | 2.7E-01       | 3.0E-01       | 4.9E-02       | 2.4E-01       | 2.0E-01       | 2.8E-01       | 4.9E-01       | 3.3E-01       |               |
| 2             | 0             | 0             | 2             | 0             | 2             | 3             | 2             | 1             | 0             | 1             |               |
| 6.3E-01       | 0.0E+00       | 0.0E+00       | 1.2E-01       | 0.0E+00       | 8.3E-01       | 3.8E-01       | -2.3E-01      | 0.0E+00       | 0.0E+00       | 0.0E+00       |               |
| 1.2E+01       | 1.3E+01       | 3.3E+00       | 6.3E+00       | 9.4E+00       | 1.6E+01       | 1.6E+01       | 1.2E+01       | 4.8E+00       | 8.3E+00       | 4.1E+00       |               |

| Specific_Rare |
|---------------|---------------|---------------|---------------|---------------|---------------|---------------|---------------|---------------|---------------|---------------|
| At_F0145      | At_F0147      | At_F0148      | At_F0156      | At_F0163      | At_F0173      | At_F0176      | At_F0180      | At_F0191      | At_F0193      | At_F0197      |
| -             | -             | -             | -             | -             | -             | -             | -             | -             | -             | -             |
| 5.7E-03       | 1.0E-02       | 2.9E-03       | 3.2E-03       | 1.9E-03       | 4.1E-03       | 7.1E-03       | 9.9E-03       | 4.1E-03       | 3.5E-03       | 2.2E-03       |
| 4.0E-03       | 7.3E-03       | 2.4E-03       | 5.9E-03       | 3.6E-03       | 2.5E-03       | 6.7E-03       | 2.8E-03       | 1.1E-03       | 1.0E-02       | 2.1E-03       |
| 3.3E-03       | 1.0E-02       | 1.0E-02       | 2.2E-03       | 1.5E-02       | 2.1E-03       | 1.0E-02       | 1.7E-03       | 5.0E-03       | 7.1E-03       | 1.3E-03       |
| 4.8E-02       | 1.5E-01       | 5.6E-02       | 7.3E-02       | 5.4E-02       | 9.3E-02       | 1.5E-01       | 7.1E-02       | 7.2E-02       | 1.0E-01       | 4.7E-02       |
| 4.0E-02       | 7.5E-02       | 4.3E-02       | 7.4E-02       | 7.3E-02       | 5.6E-02       | 1.5E-01       | 3.6E-02       | 3.5E-02       | 1.1E-01       | 5.1E-02       |
| 3.1E-02       | 1.4E-01       | 8.1E-02       | 6.4E-02       | 2.4E-01       | 5.2E-02       | 1.0E-01       | 2.7E-02       | 3.1E-02       | 9.3E-02       | 3.7E-02       |
| 0.0E+00       | 1.1E+00       | 0.0E+00       | 5.0E+01       | 0.0E+00       | 0.0E+00       | 4.0E+00       | 0.0E+00       | 3.7E+00       | 1.4E+00       | 0.0E+00       |
| 0             | 0             | 0             | 71            | 0             | 0             | 0             | 0             | 0             | 0             | 0             |
| 0             | 0             | 1             | 9             | 0             | 0             | 0             | 0             | 0             | 0             | 1             |
| 0             | 0             | 0             | 0             | 0             | 17            | 0             | 0             | 83            | 0             | 0             |
| 0             | 0             | 0             | 0             | 0             | 0             | 0             | 0             | 22            | 0             | 0             |
| 0             | 0             | 0             | 0             | 0             | 0             | 0             | 0             | 0             | 0             | 0             |
| 0             | 0             | 0             | 0             | 0             | 0             | 27            | 0             | 0             | 33            | 0             |
| 0             | 0             | 0             | 0             | 0             | 0             | 0             | 0             | 0             | 0             | 8             |
| 0             | 0             | 0             | 100           | 0             | 0             | 0             | 0             | 38            | 8             | 0             |
| 0             | 0             | 0             | 55            | 0             | 0             | 17            | 0             | 0             | 0             | 0             |
| 0             | 5             | 0             | 36            | 0             | 0             | 0             | 0             | 0             | 0             | 0             |
| 0             | 0             | 0             | 50            | 0             | 0             | 0             | 0             | 0             | 0             | 0             |
| 0             | 0             | 0             | 100           | 0             | 0             | 0             | 0             | 0             | 0             | 0             |
| 0             | 60            | 0             | 100           | 0             | 0             | 0             | 0             | 0             | 0             | 0             |
| 0             | 24            | 0             | 30            | 0             | 0             | 0             | 0             | 0             | 0             | 0             |
| 0             | 0             | 0             | 0             | 18            | 0             | 0             | 14            | 0             | 0             | 0             |
| 0             | 0             | 0             | 0             | 57            | 0             | 0             | 40            | 0             | 0             | 0             |
| 0             | 0             | 0             | 20            | 100           | 6             | 0             | 60            | 0             | 0             | 0             |
| 0             | 0             | 0             | 0             | 0             | 0             | 0             | 0             | 0             | 0             | 0             |
| 0             | 0             | 0             | 0             | 0             | 0             | 0             | 0             | 0             | 50            | 0             |
| 0             | 0             | 0             | 0             | 0             | 0             | 0             | 0             | 0             | 0             | 0             |
| 0             | 0             | 0             | 0             | 0             | 0             | 0             | 0             | 0             | 25            | 0             |
| 0             | 0             | 0             | 0             | 0             | 0             | 0             | 0             | 0             | 0             | 0             |
| 0             | 0             | 0             | 67            | 0             | 0             | 0             | 0             | 0             | 0             | 0             |
| 0             | 0             | 0             | 17            | 0             | 0             | 0             | 0             | 0             | 0             | 0             |
| 0             | 0             | 0             | 22            | 0             | 0             | 0             | 0             | 0             | 0             | 0             |
| 0             | 0             | 0             | 47            | 0             | 0             | 0             | 0             | 0             | 0             | 0             |
| 0             | 0             | 0             | 86            | 0             | 0             | 0             | 0             | 0             | 0             | 0             |
| 0             | 0             | 0             | 0             | 0             | 0             | 0             | 0             | 0             | 0             | 0             |
| 0             | 0             | 0             | 14            | 0             | 0             | 0             | 0             | 0             | 0             | 0             |
| 0             | 0             | 0             | 0             | 21            | 0             | 0             | 0             | 0             | 0             | 0             |
| 0             | 0             | 0             | 0             | 57            | 0             | 0             | 0             | 0             | 0             | 0             |
| 0             | 0             | 0             | 0             | 100           | 0             | 0             | 0             | 0             | 0             | 0             |
| 0             | 4             | 0             | 0             | 0             | 4             | 0             | 0             | 10            | 0             | 0             |
| 0             | 0             | 0             | 0             | 0             | 0             | 0             | 0             | 0             | 5             | 0             |
| 0             | 0             | 0             | 0             | 0             | 2             | 0             | 0             | 0             | 0             | 0             |
| 0             | 0             | 0             | 0             | 0             | 0             | 0             | 0             | 0             | 14            | 0             |
| 0             | 0             | 0             | 0             | 0             | 0             | 0             | 0             | 0             | 0             | 0             |
| 0             | 0             | 0             | 5             | 0             | 0             | 0             | 0             | 0             | 0             | 0             |
| 0             | 0             | 0             | 6             | 0             | 0             | 0             | 0             | 0             | 0             | 0             |
| 0             | 0             | 0             | 1             | 0             | 0             | 0             | 0             | 0             | 0             | 1             |
| 0             | 0             | 0             | 4             | 0             | 0             | 0             | 0             | 0             | 0             | 0             |
| 0             | 0             | 3             | 17            | 0             | 0             | 0             | 0             | 0             | 0             | 0             |
| 0             | 0             | 0             | 6             | 0             | 0             | 0             | 0             | 0             | 0             | 0             |
| 0             | 0             | 0             | 9             | 0             | 0             | 0             | 0             | 2             | 0             | 0             |
| 0             | 0             | 0             | 0             | 12            | 0             | 0             | 0             | 0             | 0             | 0             |
| 0             | 0             | 0             | 0             | 6             | 0             | 0             | 0             | 0             | 0             | 0             |
| 0             | 0             | 0             | 0             | 35            | 0             | 0             | 0             | 0             | 5             | 0             |
| 7.5E-02       | 6.1E-02       | 2.6E-01       | 3.0E-01       | 6.6E-01       | 1.2E-01       | 3.8E-01       | 1.4E-01       | 8.9E-02       | 2.5E-01       | 1.0E-01       |
| 3.1E-01       | 2.6E-01       | 3.0E-01       | 5.0E-02       | 1.2E-01       | 3.2E-01       | 1.5E-01       | 3.0E-01       | 2.5E-01       | 1.5E-01       | 2.9E-01       |
| 2             | 0             | 3             | 2             | 2             | 2             | 4             | 1             | 3             | 2             | 2             |
| 0.0E+00       | 0.0E+00       | -9.3E-01      | 3.5E-02       | 6.0E-01       | 8.3E-01       | 0.0E+00       | 0.0E+00       | -2.5E-01      | 5.3E-01       | -1.3E+00      |
| 4.6E+00       | 7.9E+00       | 6.3E+00       | 5.0E+00       | 1.8E+01       | 9.3E+00       | 4.3E+00       | 3.5E+00       | 9.2E+00       | 1.6E+00       | 1.7E+01       |

| Specific_Rare |
|---------------|---------------|---------------|---------------|---------------|---------------|---------------|---------------|---------------|---------------|---------------|---------------|
| At_F0215      | At_F0216      | At_F0217      | At_F0222      | At_F0237      | At_F0242      | At_F0247      | At_F0248      | At_F0261      | At_F0280      | At_F0285      |               |
| -             | -             | -             | -             | -             | -             | -             | -             | -             | -             | -             | -             |
| 8.5E-03       | 6.7E-03       | 7.5E-03       | 5.3E-03       | 7.7E-03       | 8.4E-03       | 5.6E-03       | 5.0E-03       | 8.1E-03       | 9.9E-03       | 2.8E-03       |               |
| 4.7E-03       | 4.4E-03       | 2.7E-03       | 3.8E-03       | 7.0E-03       | 4.2E-03       | 1.8E-03       | 4.0E-03       | 2.9E-03       | 1.1E-02       | 3.6E-03       |               |
| 2.5E-03       | 3.7E-03       | 5.9E-03       | 6.0E-03       | 5.2E-03       | 7.8E-03       | 2.2E-03       | 4.6E-03       | 2.6E-03       | 7.8E-03       | 7.4E-03       |               |
| 1.1E-01       | 5.8E-02       | 1.0E-01       | 8.5E-02       | 9.6E-02       | 1.6E-01       | 5.2E-02       | 6.6E-02       | 1.7E-01       | 1.3E-01       | 4.4E-02       |               |
| 4.8E-02       | 5.0E-02       | 5.0E-02       | 7.5E-02       | 7.9E-02       | 6.9E-02       | 2.4E-02       | 3.9E-02       | 6.2E-02       | 9.8E-02       | 6.9E-02       |               |
| 8.7E-02       | 5.6E-02       | 8.4E-02       | 8.0E-02       | 1.0E-01       | 6.0E-02       | 3.6E-02       | 7.3E-02       | 7.0E-02       | 8.2E-02       | 9.6E-02       |               |
| 3.3E+00       | 3.0E+00       | 1.5E+01       | 1.0E+01       | 1.4E+00       | 0.0E+00       | 1.5E+00       | 0.0E+00       | 0.0E+00       | 1.5E+01       | 3.8E+00       |               |
| 0             | 6             | 0             | 0             | 0             | 9             | 4             | 0             | 4             | 3             | 0             |               |
| 1             | 0             | 0             | 0             | 1             | 4             | 0             | 1             | 0             | 1             | 0             |               |
| 33            | 0             | 0             | 0             | 0             | 0             | 0             | 0             | 0             | 20            | 17            |               |
| 0             | 0             | 0             | 0             | 67            | 0             | 0             | 0             | 67            | 43            | 0             |               |
| 0             | 0             | 0             | 0             | 0             | 0             | 10            | 0             | 7             | 0             | 6             |               |
| 0             | 0             | 13            | 0             | 0             | 0             | 0             | 0             | 0             | 9             | 24            |               |
| 0             | 0             | 27            | 0             | 0             | 0             | 0             | 0             | 0             | 60            | 0             |               |
| 0             | 0             | 16            | 0             | 0             | 0             | 0             | 0             | 0             | 0             | 0             |               |
| 0             | 0             | 25            | 22            | 6             | 0             | 0             | 0             | 0             | 44            | 0             |               |
| 0             | 0             | 0             | 18            | 0             | 0             | 0             | 0             | 0             | 0             | 4             |               |
| 15            | 25            | 11            | 0             | 0             | 0             | 11            | 0             | 0             | 8             | 13            |               |
| 0             | 0             | 50            | 0             | 0             | 0             | 0             | 0             | 0             | 50            | 0             |               |
| 0             | 0             | 0             | 0             | 0             | 0             | 0             | 0             | 0             | 0             | 0             |               |
| 45            | 0             | 0             | 0             | 0             | 0             | 0             | 0             | 0             | 20            | 0             |               |
| 45            | 0             | 0             | 0             | 0             | 0             | 0             | 26            | 0             | 0             | 0             |               |
| 0             | 0             | 0             | 25            | 43            | 0             | 0             | 10            | 0             | 40            | 0             |               |
| 0             | 0             | 0             | 0             | 0             | 89            | 0             | 0             | 0             | 0             | 0             |               |
| 0             | 0             | 0             | 0             | 0             | 0             | 0             | 0             | 100           | 0             | 13            |               |
| 0             | 0             | 0             | 0             | 0             | 0             | 0             | 0             | 50            | 0             | 0             |               |
| 0             | 0             | 0             | 0             | 0             | 0             | 9             | 0             | 0             | 5             | 0             |               |
| 0             | 0             | 0             | 0             | 0             | 17            | 0             | 0             | 0             | 0             | 0             |               |
| 0             | 0             | 0             | 0             | 0             | 0             | 0             | 0             | 0             | 0             | 0             |               |
| 0             | 0             | 0             | 0             | 0             | 0             | 0             | 0             | 0             | 0             | 0             |               |
| 0             | 0             | 0             | 0             | 0             | 0             | 0             | 0             | 0             | 0             | 0             |               |
| 0             | 5             | 0             | 0             | 0             | 15            | 0             | 0             | 0             | 0             | 0             |               |
| 0             | 7             | 0             | 0             | 0             | 0             | 11            | 0             | 11            | 7             | 0             |               |
| 0             | 0             | 0             | 0             | 0             | 0             | 0             | 0             | 0             | 0             | 0             |               |
| 0             | 0             | 0             | 0             | 0             | 0             | 0             | 0             | 0             | 0             | 0             |               |
| 0             | 0             | 0             | 0             | 0             | 0             | 0             | 0             | 0             | 0             | 0             |               |
| 0             | 0             | 0             | 0             | 0             | 0             | 0             | 0             | 0             | 0             | 0             |               |
| 0             | 0             | 0             | 0             | 0             | 0             | 0             | 0             | 0             | 0             | 0             |               |
| 0             | 0             | 0             | 0             | 0             | 0             | 0             | 0             | 0             | 0             | 0             |               |
| 0             | 0             | 0             | 0             | 0             | 0             | 0             | 0             | 0             | 0             | 0             |               |
| 0             | 0             | 0             | 0             | 0             | 0             | 0             | 0             | 0             | 0             | 0             |               |
| 0             | 0             | 0             | 0             | 0             | 0             | 0             | 0             | 0             | 0             | 0             |               |
| 0             | 0             | 0             | 0             | 0             | 0             | 0             | 0             | 0             | 0             | 0             |               |
| 0             | 0             | 0             | 0             | 0             | 0             | 0             | 0             | 0             | 0             | 0             |               |
| 0             | 0             | 0             | 0             | 0             | 0             | 0             | 0             | 0             | 0             | 0             |               |
| 0             | 0             | 0             | 0             | 0             | 0             | 0             | 0             | 0             | 0             | 0             |               |
| 0             | 0             | 0             | 0             | 0             | 0             | 0             | 0             | 0             | 0             | 0             |               |
| 0             | 0             | 0             | 0             | 0             | 0             | 0             | 0             | 0             | 0             | 0             |               |
| 0             | 0             | 0             | 0             | 0             | 0             | 0             | 0             | 0             | 0             | 0             |               |
| 0             | 4             | 0             | 2             | 0             | 0             | 0             | 0             | 0             | 0             | 0             |               |
| 0             | 0             | 0             | 0             | 0             | 2             | 0             | 0             | 0             | 0             | 0             |               |
| 1.5E-01       | 3.5E-02       | 4.0E-01       | 9.2E-02       | 2.4E-01       | 2.0E-01       | 2.5E-01       | 6.1E-01       | 7.9E-02       | 6.6E-01       | 3.2E-01       |               |
| 1.8E-01       | 7.0E-02       | 4.2E-01       | 5.4E-02       | 2.2E-01       | 6.5E-01       | 2.0E-01       | 3.3E-01       | 3.8E-01       | 3.3E-01       | 2.0E-01       |               |
| 0             | 2             | 2             | 2             | 2             | 0             | 2             | 2             | 2             | 2             | 2             |               |
| 0.0E+00       | -2.1E+00      | 3.1E-01       | 9.0E-03       | -7.2E-01      | 0.0E+00       | -1.8E-01      | -3.3E-01      | -3.7E-01      | 0.0E+00       | 1.7E-01       |               |
| 2.2E+01       | 2.7E+00       | 1.4E+01       | 6.5E+00       | 1.2E+01       | 7.8E+00       | 5.2E+00       | 8.4E+00       | 1.0E+01       | 1.6E+01       | 2.3E+00       |               |



| Specific_Rare |
|---------------|---------------|---------------|---------------|---------------|---------------|---------------|---------------|---------------|---------------|---------------|
| At_F0371      | At_F0373      | At_F0379      | At_F0380      | At_F0383      | At_F0389      | At_F0404      | At_F0405      | At_F0430      | At_F0447      | At_F0449      |
| -             | -             | bm            | -             | -             | -             | -             | -             | -             | -             | -             |
| 9.6E-03       | 5.4E-03       | 1.4E-03       | 2.4E-03       | 7.5E-03       | 5.3E-03       | 4.9E-03       | 1.0E-02       | 9.9E-04       | 1.3E-02       | 1.2E-03       |
| 6.4E-03       | 1.5E-02       | 2.6E-03       | 4.9E-03       | 1.3E-02       | 1.3E-03       | 3.8E-03       | 2.2E-03       | 3.4E-04       | 6.1E-03       | 4.5E-03       |
| 1.3E-02       | 1.3E-02       | 1.7E-03       | 4.3E-03       | 1.4E-02       | 2.4E-03       | 2.0E-03       | 1.2E-03       | 2.3E-05       | 1.0E-02       | 3.7E-03       |
| 1.2E-01       | 9.0E-02       | 3.4E-02       | 3.4E-02       | 9.1E-02       | 7.1E-02       | 5.3E-02       | 6.1E-02       | 3.5E-02       | 1.3E-01       | 2.8E-02       |
| 1.3E-01       | 9.8E-02       | 4.1E-02       | 4.3E-02       | 1.5E-01       | 2.9E-02       | 3.5E-02       | 3.6E-02       | 1.2E-02       | 8.7E-02       | 3.8E-02       |
| 1.3E-01       | 9.0E-02       | 3.3E-02       | 4.6E-02       | 1.3E-01       | 3.1E-02       | 3.5E-02       | 1.7E-02       | 3.0E-03       | 7.5E-02       | 3.8E-02       |
| 0.0E+00       | 0.0E+00       | 2.1E+01       | 5.7E+00       | 4.8E+01       | 2.4E+00       | 0.0E+00       | 0.0E+00       | 0.0E+00       | 4.5E+00       | 0.0E+00       |
| 0             | 0             | 14            | 0             | 75            | 0             | 0             | 0             | 0             | 0             | 0             |
| 1             | 0             | 8             | 0             | 18            | 0             | 0             | 0             | 0             | 0             | 0             |
| 0             | 0             | 17            | 0             | 25            | 0             | 0             | 33            | 0             | 25            | 80            |
| 0             | 0             | 0             | 0             | 17            | 0             | 0             | 0             | 60            | 7             | 56            |
| 0             | 0             | 14            | 0             | 44            | 0             | 0             | 27            | 0             | 6             | 0             |
| 0             | 0             | 43            | 0             | 38            | 0             | 0             | 0             | 0             | 0             | 0             |
| 0             | 0             | 50            | 67            | 80            | 33            | 0             | 0             | 0             | 0             | 0             |
| 0             | 0             | 71            | 0             | 100           | 7             | 0             | 0             | 0             | 27            | 0             |
| 0             | 0             | 9             | 0             | 54            | 31            | 0             | 0             | 0             | 6             | 0             |
| 0             | 0             | 0             | 17            | 31            | 4             | 0             | 0             | 0             | 0             | 0             |
| 0             | 0             | 27            | 0             | 60            | 0             | 0             | 0             | 0             | 0             | 0             |
| 0             | 0             | 75            | 0             | 100           | 0             | 0             | 0             | 0             | 0             | 0             |
| 0             | 20            | 0             | 0             | 100           | 0             | 0             | 0             | 0             | 0             | 0             |
| 0             | 0             | 0             | 0             | 17            | 0             | 0             | 0             | 0             | 0             | 0             |
| 0             | 15            | 20            | 0             | 17            | 50            | 0             | 0             | 0             | 0             | 0             |
| 0             | 10            | 50            | 36            | 31            | 33            | 10            | 22            | 0             | 0             | 33            |
| 29            | 63            | 67            | 0             | 100           | 100           | 71            | 80            | 0             | 0             | 67            |
| 0             | 0             | 0             | 0             | 43            | 0             | 0             | 0             | 0             | 0             | 0             |
| 0             | 0             | 0             | 0             | 30            | 0             | 0             | 0             | 0             | 0             | 0             |
| 0             | 0             | 0             | 0             | 20            | 0             | 0             | 0             | 0             | 0             | 0             |
| 0             | 0             | 0             | 0             | 50            | 0             | 0             | 0             | 0             | 0             | 0             |
| 0             | 0             | 0             | 0             | 33            | 33            | 0             | 0             | 0             | 0             | 0             |
| 0             | 0             | 57            | 0             | 63            | 0             | 0             | 0             | 0             | 0             | 0             |
| 0             | 0             | 0             | 0             | 27            | 0             | 0             | 0             | 0             | 0             | 0             |
| 0             | 0             | 0             | 0             | 29            | 0             | 0             | 0             | 0             | 0             | 0             |
| 0             | 0             | 0             | 0             | 33            | 0             | 0             | 0             | 0             | 0             | 0             |
| 0             | 0             | 0             | 0             | 100           | 0             | 0             | 0             | 0             | 0             | 0             |
| 0             | 0             | 0             | 0             | 67            | 0             | 0             | 0             | 0             | 0             | 0             |
| 0             | 0             | 0             | 0             | 25            | 0             | 0             | 0             | 0             | 0             | 0             |
| 0             | 0             | 0             | 0             | 6             | 0             | 0             | 0             | 0             | 0             | 0             |
| 0             | 0             | 0             | 0             | 0             | 0             | 0             | 0             | 0             | 0             | 0             |
| 0             | 0             | 0             | 0             | 83            | 0             | 0             | 0             | 0             | 0             | 0             |
| 13            | 0             | 4             | 0             | 7             | 0             | 0             | 0             | 0             | 0             | 0             |
| 0             | 0             | 0             | 0             | 11            | 0             | 0             | 0             | 0             | 0             | 0             |
| 0             | 0             | 0             | 0             | 6             | 0             | 0             | 1             | 0             | 0             | 0             |
| 0             | 0             | 0             | 0             | 0             | 0             | 0             | 0             | 0             | 0             | 0             |
| 0             | 0             | 0             | 0             | 5             | 6             | 0             | 0             | 0             | 0             | 0             |
| 0             | 0             | 33            | 0             | 19            | 3             | 0             | 0             | 0             | 0             | 0             |
| 0             | 0             | 2             | 0             | 10            | 0             | 0             | 0             | 0             | 0             | 0             |
| 1             | 0             | 0             | 0             | 2             | 0             | 0             | 0             | 0             | 0             | 0             |
| 0             | 0             | 0             | 0             | 8             | 0             | 0             | 0             | 0             | 0             | 0             |
| 5             | 0             | 0             | 0             | 27            | 0             | 0             | 0             | 0             | 0             | 0             |
| 0             | 0             | 0             | 0             | 6             | 0             | 0             | 0             | 0             | 0             | 0             |
| 0             | 0             | 0             | 0             | 2             | 2             | 0             | 0             | 0             | 0             | 0             |
| 0             | 0             | 0             | 1             | 1             | 0             | 0             | 0             | 0             | 0             | 0             |
| 0             | 0             | 0             | 0             | 7             | 0             | 0             | 0             | 0             | 0             | 0             |
| 6             | 0             | 0             | 0             | 21            | 0             | 0             | 4             | 0             | 0             | 0             |
| 6.1E-01       | 4.5E-01       | 4.8E-01       | 2.3E-01       | 3.6E-01       | 5.3E-01       | 4.4E+00       | 6.3E-02       | 1.2E+00       | 1.5E+00       | 5.7E-02       |
| 1.7E-01       | 1.8E-01       | 3.8E-01       | 3.7E-01       | 3.9E-01       | 5.0E-01       | 1.7E-01       | 1.6E-01       | 4.0E-01       | 2.4E-01       | 2.2E-01       |
| 2             | 2             | 0             | 1             | 0             | 3             | 0             | 2             | 2             | 3             | 2             |
| -2.8E+00      | -5.0E-02      | 0.0E+00       | 0.0E+00       | 0.0E+00       | -6.8E-01      | 0.0E+00       | 4.9E-01       | 1.0E+00       | 8.3E-02       | -2.5E-01      |
| 6.9E+00       | 4.2E+00       | 2.6E+00       | 3.1E+01       | 3.3E+00       | 6.6E+00       | 1.4E+01       | 2.6E+00       | 2.1E+00       | 9.1E+00       | 6.3E+00       |

| Specific_Rare |
|---------------|---------------|---------------|---------------|---------------|---------------|---------------|---------------|---------------|---------------|---------------|---------------|
| At_F0450      | At_F0452      | At_F0454      | At_F0459      | At_F0463      | At_F0484      | At_F0489      | At_F0491      | At_F0501      | At_F0536      | At_F0554      |               |
| -             | -             | -             | -             | -             | -             | -             | -             | -             | -             | -             |               |
| 1.1E-02       | 2.1E-03       | 3.6E-03       | 2.7E-03       | 4.6E-03       | 2.6E-03       | 4.1E-03       | 6.0E-03       | 7.2E-03       | 5.6E-03       | 3.5E-03       |               |
| 1.1E-02       | 2.9E-03       | 7.0E-03       | 2.1E-03       | 4.0E-03       | 8.4E-04       | 3.4E-03       | 7.1E-03       | 6.8E-03       | 6.7E-03       | 7.0E-04       |               |
| 4.1E-03       | 2.4E-03       | 9.7E-03       | 1.8E-03       | 6.3E-03       | 2.0E-03       | 4.6E-03       | 6.4E-03       | 4.1E-03       | 6.8E-03       | 2.4E-03       |               |
| 9.3E-02       | 4.9E-02       | 5.9E-02       | 5.8E-02       | 6.6E-02       | 6.5E-02       | 6.6E-02       | 1.3E-01       | 7.6E-02       | 9.7E-02       | 5.5E-02       |               |
| 9.3E-02       | 5.4E-02       | 5.6E-02       | 5.5E-02       | 4.4E-02       | 3.6E-02       | 6.2E-02       | 1.0E-01       | 6.0E-02       | 9.8E-02       | 3.6E-02       |               |
| 1.2E-01       | 7.2E-02       | 8.2E-02       | 4.0E-02       | 6.5E-02       | 4.0E-02       | 7.4E-02       | 1.1E-01       | 6.5E-02       | 1.1E-01       | 4.0E-02       |               |
| 8.3E+00       | 0.0E+00       | 0.0E+00       | 0.0E+00       | 1.1E+00       | 0.0E+00       | 2.9E+01       | 3.4E+01       | 0.0E+00       | 4.3E+01       | 7.1E+00       |               |
| 0             | 0             | 0             | 0             | 0             | 0             | 55            | 27            | 0             | 50            | 0             |               |
| 2             | 1             | 0             | 0             | 1             | 0             | 3             | 1             | 0             | 1             | 0             |               |
| 0             | 0             | 0             | 0             | 0             | 0             | 100           | 85            | 0             | 100           | 0             |               |
| 0             | 0             | 0             | 0             | 0             | 0             | 13            | 47            | 0             | 33            | 7             |               |
| 0             | 0             | 0             | 0             | 0             | 0             | 17            | 27            | 0             | 22            | 6             |               |
| 11            | 0             | 0             | 0             | 0             | 0             | 50            | 40            | 0             | 57            | 9             |               |
| 50            | 0             | 0             | 0             | 0             | 0             | 100           | 50            | 0             | 67            | 0             |               |
| 0             | 0             | 0             | 0             | 0             | 0             | 58            | 78            | 0             | 100           | 33            |               |
| 0             | 0             | 0             | 0             | 0             | 0             | 41            | 34            | 0             | 43            | 5             |               |
| 14            | 0             | 0             | 0             | 5             | 0             | 10            | 21            | 0             | 50            | 4             |               |
| 0             | 0             | 0             | 0             | 0             | 0             | 0             | 0             | 0             | 0             | 7             |               |
| 50            | 0             | 0             | 0             | 0             | 0             | 100           | 100           | 0             | 100           | 0             |               |
| 38            | 0             | 0             | 0             | 0             | 0             | 100           | 100           | 0             | 0             | 0             |               |
| 48            | 0             | 0             | 40            | 0             | 20            | 0             | 0             | 0             | 13            | 0             |               |
| 11            | 0             | 0             | 18            | 0             | 29            | 0             | 0             | 0             | 45            | 0             |               |
| 46            | 0             | 0             | 33            | 0             | 0             | 0             | 0             | 0             | 38            | 0             |               |
| 28            | 0             | 0             | 33            | 0             | 29            | 0             | 0             | 0             | 100           | 17            |               |
| 0             | 0             | 0             | 0             | 0             | 0             | 67            | 0             | 0             | 0             | 0             |               |
| 0             | 0             | 0             | 0             | 0             | 0             | 14            | 8             | 0             | 0             | 0             |               |
| 0             | 0             | 0             | 0             | 0             | 0             | 18            | 15            | 0             | 10            | 0             |               |
| 0             | 0             | 0             | 0             | 0             | 0             | 42            | 29            | 0             | 25            | 0             |               |
| 0             | 0             | 0             | 0             | 0             | 0             | 100           | 33            | 0             | 67            | 0             |               |
| 0             | 0             | 0             | 0             | 0             | 0             | 56            | 17            | 0             | 100           | 0             |               |
| 0             | 0             | 0             | 0             | 0             | 0             | 52            | 27            | 0             | 0             | 0             |               |
| 0             | 0             | 0             | 0             | 0             | 0             | 13            | 15            | 0             | 25            | 0             |               |
| 0             | 0             | 0             | 0             | 0             | 0             | 0             | 0             | 0             | 0             | 0             |               |
| 0             | 0             | 0             | 0             | 0             | 0             | 50            | 25            | 0             | 50            | 0             |               |
| 29            | 0             | 0             | 0             | 0             | 0             | 0             | 0             | 0             | 0             | 0             |               |
| 40            | 0             | 0             | 0             | 0             | 0             | 0             | 0             | 0             | 25            | 0             |               |
| 8             | 0             | 0             | 0             | 0             | 0             | 0             | 0             | 0             | 13            | 0             |               |
| 60            | 0             | 0             | 0             | 0             | 0             | 0             | 0             | 0             | 0             | 0             |               |
| 33            | 0             | 14            | 0             | 0             | 0             | 0             | 0             | 0             | 75            | 0             |               |
| 0             | 0             | 0             | 0             | 0             | 0             | 15            | 5             | 0             | 0             | 0             |               |
| 0             | 0             | 0             | 0             | 0             | 0             | 0             | 0             | 0             | 0             | 0             |               |
| 0             | 0             | 0             | 0             | 0             | 0             | 1             | 0             | 0             | 1             | 0             |               |
| 0             | 0             | 0             | 0             | 0             | 0             | 3             | 2             | 0             | 0             | 0             |               |
| 4             | 0             | 0             | 0             | 0             | 0             | 5             | 0             | 0             | 3             | 0             |               |
| 0             | 0             | 0             | 0             | 4             | 0             | 2             | 2             | 0             | 0             | 0             |               |
| 0             | 2             | 0             | 0             | 0             | 0             | 5             | 1             | 0             | 0             | 0             |               |
| 0             | 0             | 0             | 0             | 0             | 0             | 2             | 1             | 0             | 0             | 0             |               |
| 4             | 0             | 0             | 0             | 0             | 0             | 0             | 0             | 0             | 0             | 0             |               |
| 0             | 0             | 0             | 0             | 0             | 0             | 0             | 0             | 0             | 7             | 0             |               |
| 3             | 0             | 0             | 0             | 0             | 0             | 0             | 0             | 0             | 0             | 0             |               |
| 3             | 0             | 0             | 0             | 0             | 0             | 0             | 0             | 0             | 6             | 0             |               |
| 7             | 0             | 0             | 0             | 0             | 0             | 0             | 0             | 0             | 1             | 0             |               |
| 12            | 0             | 0             | 0             | 0             | 0             | 0             | 0             | 0             | 0             | 0             |               |
| 5             | 0             | 0             | 0             | 0             | 0             | 0             | 0             | 0             | 8             | 0             |               |
| 2.8E-01       | 3.2E-01       | 7.1E-02       | 8.3E-02       | 2.0E-01       | 1.2E+00       | 1.9E+00       | 2.2E-01       | 4.8E-02       | 2.7E-01       | 1.3E-01       |               |
| 3.6E-01       | 1.0E-01       | 2.9E-01       | 3.3E-01       | 2.2E-01       | 3.0E-01       | 6.6E-02       | 7.8E-02       | 2.8E-01       | 1.5E-01       | 3.9E-01       |               |
| 0             | 2             | 3             | 0             | 2             | 2             | 2             | 2             | 2             | 0             | 0             |               |
| 0.0E+00       | -1.9E+00      | -2.6E+00      | 0.0E+00       | 7.2E-01       | 1.0E+00       | 2.7E-01       | 5.2E-01       | -1.5E-02      | 0.0E+00       | 0.0E+00       |               |
| 6.2E+00       | 1.2E+01       | 4.0E+00       | 5.9E+00       | 7.1E+00       | 8.5E+00       | 3.0E+00       | 3.0E+00       | 6.7E+00       | 1.8E+01       | 3.3E+00       |               |





| Specific_Rare |
|---------------|---------------|---------------|---------------|---------------|---------------|---------------|---------------|---------------|---------------|---------------|---------------|
| At_F0659      | At_F0660      | At_F0670      | At_F0675      | At_F0691      | At_F0694      | At_F0707      | At_F0006      | At_F0015      | At_F0017      | At_F0019      |               |
| -             | -             | -             | -             | -             | -             | -             | -             | -             | -             | -             |               |
| 3.3E-03       | 8.2E-03       | 8.8E-03       | 9.3E-03       | 5.2E-03       | 3.1E-03       | 6.5E-03       | 7.4E-03       | 5.8E-03       | 7.1E-03       | 6.7E-03       |               |
| 3.1E-03       | 3.4E-03       | 6.2E-03       | 1.7E-03       | 5.8E-03       | 5.7E-03       | 8.3E-03       | 4.3E-03       | 2.6E-03       | 3.2E-03       | 7.9E-03       |               |
| 1.1E-02       | 4.0E-03       | 1.0E-02       | 4.6E-03       | 5.9E-03       | 1.9E-02       | 1.5E-02       | 3.2E-03       | 4.5E-03       | 4.1E-03       | 1.8E-03       |               |
| 6.6E-02       | 7.7E-02       | 1.1E-01       | 1.4E-01       | 5.8E-02       | 6.1E-02       | 1.4E-01       | 6.5E-02       | 5.3E-02       | 6.7E-02       | 1.0E-01       |               |
| 4.5E-02       | 6.3E-02       | 7.1E-02       | 3.7E-02       | 4.3E-02       | 6.1E-02       | 6.6E-02       | 5.5E-02       | 3.3E-02       | 4.1E-02       | 8.7E-02       |               |
| 8.8E-02       | 5.5E-02       | 9.5E-02       | 5.8E-02       | 4.3E-02       | 1.8E-01       | 1.2E-01       | 6.2E-02       | 4.2E-02       | 5.0E-02       | 3.4E-02       |               |
| 0.0E+00       | 4.8E+00       | 0.0E+00       | 0.0E+00       | 0.0E+00       | 0.0E+00       | 1.1E+00       | 6.3E+00       | 0.0E+00       | 0.0E+00       | 1.7E+01       |               |
| 0             | 0             | 0             | 0             | 0             | 0             | 0             | 0             | 0             | 0             | 7             |               |
| 0             | 0             | 1             | 1             | 0             | 1             | 1             | 0             | 2             | 0             | 1             |               |
| 0             | 0             | 0             | 0             | 0             | 11            | 9             | 0             | 0             | 0             | 0             |               |
| 0             | 0             | 0             | 0             | 0             | 0             | 0             | 0             | 0             | 0             | 10            |               |
| 0             | 0             | 0             | 0             | 0             | 0             | 0             | 24            | 0             | 25            | 20            |               |
| 0             | 0             | 38            | 0             | 0             | 0             | 0             | 0             | 0             | 0             | 10            |               |
| 0             | 0             | 0             | 0             | 0             | 0             | 0             | 20            | 0             | 0             | 0             |               |
| 0             | 0             | 0             | 0             | 0             | 0             | 9             | 0             | 0             | 0             | 0             |               |
| 0             | 0             | 0             | 0             | 0             | 0             | 0             | 0             | 0             | 0             | 19            |               |
| 0             | 0             | 0             | 0             | 0             | 0             | 0             | 5             | 0             | 0             | 3             |               |
| 0             | 21            | 0             | 0             | 0             | 0             | 0             | 25            | 0             | 0             | 4             |               |
| 0             | 20            | 0             | 0             | 0             | 0             | 0             | 14            | 0             | 0             | 59            |               |
| 0             | 0             | 0             | 0             | 0             | 0             | 0             | 0             | 0             | 0             | 0             |               |
| 0             | 0             | 0             | 0             | 0             | 33            | 0             | 0             | 0             | 0             | 11            |               |
| 0             | 0             | 0             | 0             | 0             | 0             | 0             | 0             | 0             | 0             | 0             |               |
| 0             | 0             | 0             | 0             | 0             | 44            | 0             | 0             | 0             | 0             | 0             |               |
| 0             | 0             | 0             | 0             | 0             | 100           | 0             | 0             | 0             | 0             | 0             |               |
| 0             | 0             | 0             | 0             | 0             | 0             | 0             | 0             | 0             | 0             | 0             |               |
| 0             | 0             | 0             | 0             | 0             | 0             | 0             | 0             | 0             | 0             | 0             |               |
| 0             | 0             | 0             | 0             | 0             | 0             | 0             | 0             | 0             | 0             | 13            |               |
| 0             | 0             | 0             | 0             | 0             | 0             | 0             | 0             | 0             | 0             | 0             |               |
| 0             | 0             | 0             | 0             | 0             | 0             | 0             | 0             | 0             | 0             | 0             |               |
| 0             | 0             | 0             | 0             | 0             | 0             | 0             | 0             | 0             | 0             | 0             |               |
| 0             | 0             | 0             | 0             | 0             | 0             | 0             | 0             | 0             | 0             | 9             |               |
| 0             | 0             | 0             | 0             | 0             | 0             | 0             | 0             | 0             | 0             | 0             |               |
| 0             | 0             | 0             | 0             | 0             | 0             | 0             | 0             | 0             | 0             | 0             |               |
| 0             | 0             | 0             | 0             | 0             | 0             | 0             | 0             | 0             | 0             | 0             |               |
| 0             | 0             | 0             | 0             | 0             | 0             | 0             | 0             | 0             | 0             | 0             |               |
| 0             | 0             | 0             | 0             | 0             | 0             | 0             | 0             | 0             | 0             | 0             |               |
| 0             | 0             | 0             | 0             | 0             | 0             | 0             | 0             | 0             | 0             | 0             |               |
| 0             | 0             | 0             | 0             | 0             | 0             | 0             | 0             | 0             | 0             | 0             |               |
| 0             | 0             | 0             | 0             | 0             | 0             | 0             | 0             | 0             | 0             | 0             |               |
| 0             | 0             | 0             | 0             | 0             | 0             | 0             | 0             | 0             | 0             | 0             |               |
| 0             | 0             | 0             | 0             | 0             | 0             | 0             | 0             | 0             | 0             | 0             |               |
| 0             | 0             | 0             | 0             | 0             | 0             | 0             | 0             | 0             | 0             | 0             |               |
| 0             | 0             | 0             | 0             | 0             | 11            | 0             | 0             | 0             | 0             | 0             |               |
| 0             | 0             | 0             | 0             | 0             | 80            | 0             | 0             | 0             | 0             | 0             |               |
| 0             | 0             | 0             | 0             | 0             | 0             | 0             | 0             | 0             | 5             | 0             |               |
| 0             | 0             | 0             | 0             | 0             | 0             | 0             | 0             | 0             | 0             | 0             |               |
| 0             | 0             | 0             | 0             | 0             | 0             | 0             | 0             | 0             | 12            | 1             |               |
| 0             | 0             | 0             | 0             | 0             | 0             | 0             | 0             | 0             | 0             | 0             |               |
| 0             | 0             | 4             | 6             | 4             | 0             | 3             | 0             | 3             | 5             | 0             |               |
| 0             | 0             | 3             | 0             | 0             | 0             | 0             | 0             | 0             | 0             | 0             |               |
| 0             | 0             | 0             | 0             | 0             | 0             | 0             | 0             | 7             | 0             | 1             |               |
| 0             | 0             | 0             | 0             | 0             | 0             | 0             | 0             | 0             | 0             | 0             |               |
| 0             | 0             | 0             | 0             | 0             | 0             | 0             | 0             | 0             | 0             | 0             |               |
| 0             | 0             | 0             | 5             | 0             | 4             | 3             | 0             | 0             | 0             | 0             |               |
| 0             | 0             | 0             | 0             | 0             | 0             | 0             | 0             | 0             | 4             | 2             |               |
| 0             | 0             | 0             | 0             | 0             | 0             | 0             | 0             | 0             | 0             | 0             |               |
| 0             | 0             | 0             | 0             | 0             | 0             | 3             | 0             | 0             | 2             | 0             |               |
| 0             | 0             | 0             | 0             | 0             | 12            | 0             | 0             | 0             | 0             | 0             |               |
| 0             | 0             | 0             | 0             | 0             | 10            | 5             | 0             | 0             | 0             | 4             |               |
| 7.4E-02       | 1.6E-01       | 4.5E-01       | 8.6E-02       | 1.2E-01       | 6.4E-02       | 2.9E-01       | 9.7E-01       | 1.6E-01       | 9.2E-02       | 4.2E-01       |               |
| 1.5E-01       | 2.8E-01       | 3.0E-01       | 1.1E-01       | 1.5E-01       | 2.3E-01       | 2.9E-01       | 4.3E-02       | 9.3E-01       | 2.0E-01       | 4.0E-01       |               |
| 2             | 3             | 0             | 2             | 2             | 3             | 2             | 2             | 3             | 0             | 1             |               |
| 1.7E-01       | 3.2E-01       | 0.0E+00       | -4.5E-01      | -4.2E-01      | -1.6E+00      | -1.0E+00      | 4.7E-01       | -3.4E-02      | 0.0E+00       | 0.0E+00       |               |
| 2.1E+01       | 8.0E+00       | 4.7E+00       | 1.0E+01       | 2.0E+00       | 1.0E+01       | 4.7E+00       | 0.0E+00       | 0.0E+00       | 0.0E+00       | 0.0E+00       |               |

| Specific_Rare |
|---------------|---------------|---------------|---------------|---------------|---------------|---------------|---------------|---------------|---------------|---------------|
| At_F0020      | At_F0021      | At_F0022      | At_F0026      | At_F0028      | At_F0031      | At_F0035      | At_F0041      | At_F0042      | At_F0046      | At_F0047      |
| -             | -             | -             | -             | -             | bm            | -             | -             | -             | -             | -             |
| 1.1E-02       | 9.4E-03       | 1.2E-02       | 1.5E-02       | 7.1E-03       | 6.2E-03       | 8.0E-03       | 4.8E-03       | 8.5E-03       | 0.0E+00       | 0.0E+00       |
| 1.3E-02       | 5.8E-03       | 9.2E-03       | 7.3E-03       | 8.9E-03       | 1.0E-02       | 1.7E-02       | 3.0E-03       | 9.5E-03       | 0.0E+00       | 0.0E+00       |
| 5.1E-03       | 1.2E-03       | 2.1E-02       | 6.6E-03       | 4.9E-03       | 7.3E-03       | 1.1E-02       | 7.6E-03       | 1.7E-03       | 0.0E+00       | 0.0E+00       |
| 9.4E-02       | 1.3E-01       | 8.0E-02       | 1.5E-01       | 9.9E-02       | 6.4E-02       | 7.3E-02       | 7.4E-02       | 1.2E-01       | 0.0E+00       | 0.0E+00       |
| 1.1E-01       | 9.3E-02       | 5.0E-02       | 9.3E-02       | 8.6E-02       | 8.3E-02       | 8.6E-02       | 3.9E-02       | 7.5E-02       | 0.0E+00       | 0.0E+00       |
| 8.9E-02       | 3.6E-02       | 1.2E-01       | 8.5E-02       | 1.0E-01       | 1.0E-01       | 7.9E-02       | 5.7E-02       | 3.8E-02       | 0.0E+00       | 0.0E+00       |
| 2.3E+00       | 4.4E+01       | 2.0E+00       | 0.0E+00       | 1.4E+01       | 2.4E+01       | 3.9E+01       | 0.0E+00       | 0.0E+00       | 0.0E+00       | 0.0E+00       |
| 0             | 70            | 3             | 0             | 24            | 27            | 56            | 0             | 0             | 0             | 0             |
| 0             | 21            | 0             | 0             | 2             | 4             | 13            | 0             | 0             | 0             | 0             |
| 60            | 0             | 56            | 0             | 0             | 100           | 0             | 0             | 0             | 0             | 0             |
| 0             | 0             | 0             | 0             | 0             | 0             | 0             | 0             | 0             | 0             | 0             |
| 7             | 25            | 0             | 0             | 0             | 0             | 0             | 0             | 25            | 0             | 0             |
| 0             | 33            | 0             | 0             | 0             | 0             | 0             | 0             | 67            | 0             | 0             |
| 0             | 100           | 0             | 0             | 0             | 0             | 0             | 0             | 0             | 0             | 0             |
| 11            | 100           | 0             | 0             | 0             | 0             | 67            | 0             | 0             | 0             | 0             |
| 0             | 73            | 4             | 0             | 45            | 73            | 47            | 0             | 0             | 0             | 0             |
| 0             | 30            | 0             | 0             | 21            | 18            | 24            | 0             | 0             | 0             | 0             |
| 0             | 14            | 0             | 0             | 0             | 29            | 52            | 0             | 0             | 0             | 0             |
| 0             | 100           | 14            | 0             | 0             | 20            | 44            | 0             | 0             | 0             | 0             |
| 0             | 0             | 60            | 43            | 0             | 0             | 0             | 0             | 0             | 0             | 0             |
| 0             | 0             | 57            | 0             | 0             | 54            | 0             | 0             | 0             | 0             | 0             |
| 0             | 0             | 14            | 0             | 0             | 18            | 0             | 0             | 0             | 0             | 0             |
| 0             | 0             | 26            | 0             | 0             | 0             | 0             | 0             | 40            | 0             | 0             |
| 0             | 0             | 100           | 0             | 0             | 0             | 0             | 43            | 100           | 0             | 0             |
| 0             | 0             | 33            | 0             | 0             | 0             | 0             | 0             | 0             | 0             | 0             |
| 0             | 20            | 25            | 0             | 0             | 0             | 0             | 0             | 0             | 0             | 0             |
| 0             | 21            | 0             | 0             | 0             | 0             | 0             | 0             | 23            | 0             | 0             |
| 0             | 45            | 0             | 0             | 0             | 0             | 0             | 0             | 56            | 0             | 0             |
| 0             | 100           | 0             | 0             | 0             | 0             | 0             | 0             | 0             | 0             | 0             |
| 0             | 86            | 0             | 0             | 0             | 0             | 40            | 0             | 0             | 0             | 0             |
| 0             | 33            | 7             | 0             | 14            | 14            | 42            | 0             | 0             | 0             | 0             |
| 0             | 36            | 0             | 0             | 27            | 31            | 21            | 0             | 0             | 0             | 0             |
| 0             | 33            | 0             | 0             | 0             | 0             | 40            | 0             | 0             | 0             | 0             |
| 0             | 0             | 0             | 0             | 0             | 0             | 33            | 0             | 0             | 0             | 0             |
| 0             | 0             | 100           | 0             | 0             | 0             | 0             | 0             | 0             | 0             | 0             |
| 0             | 0             | 29            | 0             | 0             | 0             | 0             | 0             | 0             | 0             | 0             |
| 0             | 0             | 13            | 0             | 0             | 0             | 0             | 0             | 0             | 0             | 0             |
| 0             | 0             | 17            | 0             | 0             | 0             | 0             | 0             | 0             | 0             | 0             |
| 0             | 0             | 56            | 0             | 0             | 0             | 0             | 0             | 0             | 0             | 0             |
| 0             | 0             | 17            | 0             | 0             | 0             | 0             | 4             | 0             | 0             | 0             |
| 0             | 20            | 12            | 0             | 0             | 0             | 0             | 0             | 0             | 0             | 0             |
| 0             | 7             | 0             | 0             | 0             | 0             | 0             | 0             | 8             | 0             | 0             |
| 0             | 4             | 0             | 0             | 0             | 0             | 0             | 0             | 12            | 0             | 0             |
| 0             | 43            | 0             | 0             | 0             | 0             | 0             | 0             | 0             | 0             | 0             |
| 0             | 31            | 0             | 0             | 0             | 3             | 31            | 0             | 0             | 0             | 0             |
| 0             | 10            | 0             | 0             | 0             | 0             | 6             | 0             | 0             | 0             | 0             |
| 0             | 6             | 0             | 0             | 3             | 5             | 4             | 0             | 0             | 0             | 0             |
| 0             | 8             | 0             | 0             | 0             | 0             | 5             | 0             | 0             | 0             | 0             |
| 0             | 12            | 0             | 0             | 0             | 0             | 0             | 0             | 0             | 0             | 0             |
| 0             | 0             | 0             | 0             | 0             | 0             | 0             | 0             | 0             | 0             | 0             |
| 0             | 0             | 2             | 2             | 0             | 1             | 0             | 0             | 0             | 0             | 0             |
| 0             | 1             | 4             | 0             | 1             | 0             | 0             | 0             | 0             | 0             | 0             |
| 0             | 0             | 14            | 0             | 0             | 0             | 0             | 0             | 1             | 0             | 0             |
| 0             | 0             | 57            | 0             | 0             | 0             | 0             | 0             | 3             | 0             | 0             |
| 6.9E-01       | 9.4E-02       | 3.7E-01       | 2.9E-01       | 5.9E-01       | 1.6E-01       | 9.7E-01       | 1.4E-01       | 2.3E+00       | 0.0E+00       | 0.0E+00       |
| 3.2E-01       | 8.3E-02       | 3.9E-01       | 3.5E-01       | 1.7E-01       | 1.6E-01       | 2.1E-01       | 2.3E-01       | 3.9E-01       | 2.9E-01       | 2.9E-01       |
| 0             | 2             | 2             | 2             | 2             | 2             | 4             | 2             | 0             | 1             | 1             |
| 0.0E+00       | -1.4E+00      | -9.0E-01      | -1.6E-01      | -5.0E-02      | 7.3E-01       | 4.7E-01       | 2.8E-01       | 0.0E+00       | 0.0E+00       | 0.0E+00       |
| 0.0E+00       |

| Specific_Rare |
|---------------|---------------|---------------|---------------|---------------|---------------|---------------|---------------|---------------|---------------|---------------|---------------|
| At_F0051      | At_F0053      | At_F0054      | At_F0059      | At_F0067      | At_F0069      | At_F0080      | At_F0083      | At_F0087      | At_F0088      | At_F0089      |               |
| -             | -             | -             | -             | -             | bm            | -             | -             | -             | -             | -             | -             |
| 7.4E-03       | 1.1E-02       | 2.1E-03       | 2.7E-03       | 3.1E-04       | 1.0E-02       | 4.7E-03       | 8.4E-03       | 3.9E-03       | 2.2E-03       | 4.8E-03       |               |
| 5.4E-03       | 8.4E-03       | 1.1E-02       | 1.6E-03       | 1.2E-03       | 3.4E-03       | 2.8E-03       | 5.3E-03       | 8.0E-03       | 1.6E-03       | 4.3E-03       |               |
| 1.0E-02       | 6.5E-03       | 2.4E-03       | 4.2E-03       | 5.9E-03       | 4.1E-03       | 6.7E-03       | 9.7E-03       | 3.1E-03       | 2.2E-03       | 3.4E-03       |               |
| 1.1E-01       | 7.9E-02       | 4.9E-02       | 7.9E-02       | 2.0E-02       | 8.2E-02       | 5.1E-02       | 1.3E-01       | 8.0E-02       | 5.0E-02       | 9.8E-02       |               |
| 5.9E-02       | 1.0E-01       | 1.9E-01       | 5.6E-02       | 2.9E-02       | 4.0E-02       | 2.8E-02       | 9.0E-02       | 9.7E-02       | 3.9E-02       | 9.2E-02       |               |
| 1.1E-01       | 1.6E-01       | 4.2E-02       | 7.0E-02       | 6.2E-02       | 4.5E-02       | 4.9E-02       | 1.8E-01       | 6.8E-02       | 5.0E-02       | 7.5E-02       |               |
| 1.2E+00       | 0.0E+00       | 3.9E+01       | 4.5E+00       | 0.0E+00       | 1.8E+01       | 0.0E+00       | 9.7E+00       | 0.0E+00       | 0.0E+00       | 1.4E+01       |               |
| 0             | 0             | 89            | 0             | 0             | 12            | 0             | 21            | 0             | 0             | 4             |               |
| 1             | 0             | 37            | 0             | 4             | 3             | 1             | 7             | 0             | 0             | 1             |               |
| 0             | 0             | 0             | 0             | 50            | 0             | 0             | 89            | 0             | 0             | 0             |               |
| 44            | 0             | 0             | 0             | 38            | 0             | 0             | 20            | 0             | 0             | 0             |               |
| 44            | 0             | 0             | 0             | 27            | 47            | 0             | 67            | 0             | 0             | 0             |               |
| 60            | 11            | 0             | 0             | 40            | 0             | 0             | 0             | 0             | 0             | 0             |               |
| 0             | 0             | 100           | 0             | 0             | 0             | 0             | 0             | 0             | 0             | 0             |               |
| 0             | 0             | 100           | 0             | 0             | 50            | 0             | 0             | 0             | 0             | 60            |               |
| 6             | 0             | 22            | 0             | 0             | 0             | 0             | 8             | 0             | 0             | 31            |               |
| 0             | 0             | 32            | 0             | 0             | 28            | 0             | 27            | 0             | 0             | 0             |               |
| 0             | 0             | 33            | 5             | 0             | 20            | 0             | 18            | 0             | 0             | 0             |               |
| 0             | 0             | 50            | 12            | 0             | 0             | 0             | 0             | 0             | 0             | 0             |               |
| 0             | 0             | 0             | 0             | 0             | 0             | 0             | 0             | 0             | 0             | 0             |               |
| 33            | 0             | 0             | 0             | 0             | 0             | 0             | 17            | 0             | 0             | 0             |               |
| 7             | 0             | 0             | 0             | 0             | 0             | 11            | 0             | 0             | 0             | 0             |               |
| 0             | 14            | 0             | 0             | 0             | 0             | 0             | 0             | 0             | 0             | 0             |               |
| 0             | 100           | 0             | 0             | 0             | 0             | 0             | 0             | 0             | 0             | 0             |               |
| 50            | 0             | 0             | 0             | 0             | 0             | 0             | 0             | 0             | 0             | 0             |               |
| 17            | 0             | 0             | 0             | 0             | 0             | 0             | 0             | 0             | 0             | 0             |               |
| 57            | 0             | 0             | 0             | 0             | 17            | 0             | 0             | 0             | 0             | 0             |               |
| 0             | 0             | 0             | 0             | 0             | 14            | 0             | 0             | 0             | 0             | 0             |               |
| 0             | 0             | 29            | 0             | 0             | 0             | 0             | 0             | 0             | 0             | 0             |               |
| 0             | 0             | 100           | 0             | 0             | 0             | 0             | 0             | 0             | 0             | 0             |               |
| 0             | 0             | 40            | 0             | 0             | 0             | 0             | 0             | 0             | 0             | 11            |               |
| 0             | 0             | 22            | 0             | 0             | 7             | 0             | 35            | 0             | 0             | 0             |               |
| 0             | 0             | 57            | 0             | 0             | 20            | 0             | 0             | 0             | 0             | 0             |               |
| 0             | 0             | 67            | 0             | 0             | 0             | 0             | 0             | 0             | 0             | 0             |               |
| 0             | 0             | 0             | 0             | 0             | 0             | 0             | 0             | 0             | 0             | 0             |               |
| 25            | 0             | 0             | 0             | 0             | 0             | 8             | 0             | 0             | 0             | 0             |               |
| 0             | 0             | 0             | 0             | 0             | 0             | 0             | 0             | 0             | 0             | 0             |               |
| 0             | 0             | 0             | 0             | 0             | 0             | 0             | 0             | 0             | 0             | 0             |               |
| 14            | 50            | 0             | 0             | 0             | 0             | 0             | 33            | 0             | 0             | 0             |               |
| 0             | 0             | 0             | 0             | 0             | 0             | 0             | 0             | 0             | 0             | 0             |               |
| 3             | 0             | 0             | 0             | 0             | 0             | 2             | 0             | 0             | 0             | 0             |               |
| 20            | 0             | 0             | 0             | 0             | 6             | 0             | 0             | 0             | 0             | 0             |               |
| 15            | 3             | 0             | 0             | 0             | 0             | 0             | 0             | 0             | 0             | 0             |               |
| 0             | 0             | 4             | 0             | 0             | 0             | 0             | 0             | 0             | 0             | 0             |               |
| 4             | 0             | 58            | 0             | 50            | 0             | 0             | 0             | 0             | 0             | 3             |               |
| 0             | 0             | 0             | 0             | 0             | 0             | 0             | 2             | 0             | 0             | 0             |               |
| 0             | 0             | 8             | 0             | 0             | 5             | 1             | 10            | 0             | 0             | 0             |               |
| 0             | 0             | 48            | 0             | 0             | 0             | 0             | 0             | 0             | 0             | 0             |               |
| 0             | 0             | 8             | 0             | 0             | 0             | 0             | 0             | 0             | 0             | 0             |               |
| 0             | 0             | 0             | 0             | 0             | 0             | 0             | 0             | 0             | 0             | 0             |               |
| 0             | 3             | 0             | 0             | 0             | 0             | 0             | 0             | 0             | 0             | 2             |               |
| 1             | 0             | 0             | 0             | 0             | 0             | 0             | 0             | 0             | 0             | 0             |               |
| 0             | 0             | 0             | 0             | 0             | 0             | 0             | 0             | 0             | 0             | 0             |               |
| 0             | 7             | 0             | 0             | 0             | 0             | 0             | 0             | 0             | 0             | 0             |               |
| 8.4E-02       | 3.5E-01       | 1.8E-01       | 1.6E-01       | 7.8E-01       | 5.7E-02       | 9.9E-02       | 2.1E+00       | 2.2E-01       | 1.1E+00       | 7.3E-02       |               |
| 3.0E-01       | 2.3E-01       | 2.4E-01       | 4.2E-01       | 2.0E-01       | 2.9E-01       | 1.5E-01       | 2.8E-01       | 5.1E-02       | 2.3E-01       | 4.3E-01       |               |
| 2             | 2             | 0             | 2             | 0             | 2             | 2             | 2             | 0             | 0             | 2             |               |
| 6.1E-01       | -3.3E-01      | 0.0E+00       | -8.4E-01      | 0.0E+00       | 8.1E-01       | 6.1E-01       | -3.5E+00      | 0.0E+00       | 0.0E+00       | 8.5E-01       |               |
| 0.0E+00       |               |



| Specific_Rare |
|---------------|---------------|---------------|---------------|---------------|---------------|---------------|---------------|---------------|---------------|---------------|
| At_F0157      | At_F0160      | At_F0165      | At_F0170      | At_F0174      | At_F0175      | At_F0186      | At_F0196      | At_F0198      | At_F0199      | At_F0200      |
| -             | -             | -             | -             | -             | -             | -             | -             | -             | -             | -             |
| 2.4E-03       | 3.7E-03       | 4.5E-03       | 1.7E-02       | 7.8E-03       | 3.4E-03       | 6.1E-03       | 1.5E-02       | 1.3E-02       | 4.9E-03       | 2.6E-03       |
| 4.5E-03       | 1.5E-03       | 5.0E-03       | 5.4E-03       | 7.8E-03       | 5.9E-03       | 3.2E-03       | 9.1E-03       | 7.4E-03       | 3.5E-03       | 4.3E-03       |
| 2.4E-03       | 2.7E-03       | 2.8E-03       | 2.9E-03       | 4.8E-03       | 1.0E-02       | 4.1E-03       | 4.5E-03       | 1.2E-02       | 5.8E-03       | 1.4E-03       |
| 6.4E-02       | 7.7E-02       | 5.1E-02       | 9.7E-02       | 5.2E-02       | 4.5E-02       | 5.5E-02       | 8.7E-02       | 1.6E-01       | 1.1E-01       | 5.5E-02       |
| 7.7E-02       | 6.9E-02       | 6.1E-02       | 6.2E-02       | 5.4E-02       | 4.1E-02       | 4.0E-02       | 1.1E-01       | 9.5E-02       | 7.7E-02       | 3.8E-02       |
| 6.7E-02       | 9.2E-02       | 5.0E-02       | 9.2E-02       | 3.1E-02       | 6.6E-02       | 4.1E-02       | 7.6E-02       | 1.1E-01       | 1.2E-01       | 2.8E-02       |
| 0.0E+00       | 5.9E+00       | 0.0E+00       | 0.0E+00       | 2.6E+01       | 0.0E+00       | 1.6E+00       | 5.0E+01       | 2.5E+00       | 7.6E+00       | 3.3E+00       |
| 0             | 0             | 0             | 0             | 22            | 0             | 0             | 86            | 0             | 0             | 0             |
| 1             | 0             | 1             | 1             | 1             | 0             | 1             | 20            | 0             | 0             | 0             |
| 0             | 0             | 0             | 0             | 0             | 0             | 0             | 100           | 86            | 0             | 0             |
| 0             | 0             | 0             | 0             | 0             | 0             | 0             | 45            | 56            | 8             | 0             |
| 0             | 0             | 0             | 0             | 0             | 0             | 0             | 29            | 0             | 0             | 0             |
| 0             | 20            | 0             | 0             | 0             | 0             | 0             | 53            | 8             | 50            | 0             |
| 0             | 100           | 0             | 0             | 0             | 0             | 0             | 100           | 0             | 0             | 0             |
| 0             | 0             | 0             | 0             | 33            | 0             | 9             | 100           | 0             | 0             | 0             |
| 0             | 0             | 0             | 0             | 11            | 0             | 0             | 45            | 0             | 8             | 0             |
| 0             | 0             | 0             | 0             | 22            | 0             | 0             | 27            | 6             | 0             | 0             |
| 0             | 14            | 0             | 0             | 62            | 0             | 0             | 56            | 11            | 40            | 0             |
| 0             | 100           | 0             | 0             | 0             | 0             | 0             | 100           | 0             | 0             | 6             |
| 0             | 100           | 0             | 0             | 0             | 0             | 0             | 100           | 0             | 0             | 0             |
| 0             | 27            | 0             | 0             | 0             | 0             | 0             | 0             | 0             | 75            | 0             |
| 0             | 13            | 0             | 8             | 23            | 0             | 27            | 0             | 0             | 0             | 0             |
| 0             | 0             | 0             | 0             | 40            | 0             | 17            | 50            | 0             | 0             | 0             |
| 50            | 0             | 0             | 0             | 40            | 0             | 67            | 75            | 0             | 57            | 88            |
| 0             | 0             | 0             | 0             | 0             | 0             | 0             | 100           | 86            | 0             | 0             |
| 0             | 0             | 0             | 0             | 0             | 0             | 0             | 42            | 0             | 0             | 0             |
| 0             | 0             | 0             | 0             | 0             | 0             | 0             | 36            | 25            | 0             | 0             |
| 0             | 0             | 0             | 0             | 0             | 0             | 0             | 63            | 0             | 0             | 0             |
| 0             | 0             | 0             | 0             | 0             | 0             | 0             | 100           | 0             | 0             | 0             |
| 0             | 0             | 0             | 0             | 0             | 0             | 0             | 100           | 0             | 0             | 0             |
| 0             | 0             | 0             | 0             | 0             | 0             | 0             | 58            | 0             | 0             | 0             |
| 0             | 0             | 0             | 0             | 10            | 0             | 0             | 20            | 0             | 0             | 0             |
| 0             | 0             | 0             | 0             | 38            | 0             | 0             | 60            | 0             | 0             | 0             |
| 0             | 0             | 0             | 0             | 0             | 0             | 0             | 100           | 0             | 0             | 0             |
| 0             | 0             | 0             | 0             | 0             | 0             | 0             | 100           | 0             | 0             | 0             |
| 0             | 25            | 0             | 0             | 0             | 0             | 0             | 0             | 0             | 0             | 0             |
| 0             | 6             | 0             | 0             | 5             | 0             | 0             | 5             | 0             | 0             | 0             |
| 0             | 0             | 0             | 0             | 0             | 0             | 0             | 20            | 0             | 0             | 0             |
| 0             | 0             | 0             | 0             | 0             | 0             | 0             | 27            | 0             | 0             | 0             |
| 0             | 0             | 0             | 0             | 0             | 0             | 0             | 8             | 10            | 0             | 0             |
| 1             | 0             | 0             | 0             | 0             | 0             | 0             | 20            | 0             | 0             | 0             |
| 0             | 0             | 0             | 0             | 0             | 0             | 0             | 4             | 8             | 0             | 0             |
| 0             | 0             | 0             | 0             | 0             | 0             | 0             | 11            | 0             | 0             | 0             |
| 0             | 0             | 4             | 0             | 0             | 0             | 0             | 28            | 0             | 0             | 0             |
| 0             | 0             | 0             | 3             | 0             | 0             | 3             | 12            | 0             | 0             | 0             |
| 1             | 0             | 0             | 0             | 2             | 0             | 0             | 15            | 0             | 0             | 0             |
| 0             | 0             | 0             | 0             | 1             | 0             | 0             | 6             | 0             | 0             | 0             |
| 0             | 0             | 0             | 0             | 0             | 0             | 0             | 11            | 0             | 0             | 0             |
| 0             | 0             | 4             | 0             | 0             | 0             | 0             | 26            | 0             | 0             | 0             |
| 0             | 0             | 0             | 0             | 0             | 0             | 0             | 5             | 0             | 0             | 4             |
| 3             | 0             | 0             | 0             | 0             | 0             | 0             | 0             | 2             | 0             | 0             |
| 0             | 0             | 0             | 0             | 0             | 0             | 0             | 2             | 2             | 0             | 0             |
| 0             | 0             | 0             | 0             | 0             | 0             | 0             | 2             | 0             | 0             | 2             |
| 0             | 0             | 0             | 0             | 0             | 0             | 0             | 6             | 0             | 0             | 0             |
| 2.3E-01       | 3.5E-01       | 6.8E-02       | 3.6E-01       | 3.8E-01       | 4.2E-01       | 1.0E-01       | 6.1E-01       | 4.8E-01       | 1.9E-01       | 5.8E-01       |
| 1.6E-01       | 6.0E-02       | 2.1E-01       | 1.7E-01       | 2.6E-01       | 3.2E-01       | 3.0E-01       | 5.8E-02       | 5.6E-02       | 5.7E-01       | 8.0E-01       |
| 2             | 0             | 2             | 2             | 0             | 0             | 2             | 2             | 2             | 2             | 0             |
| 4.3E-01       | 0.0E+00       | -2.0E-02      | 4.1E-01       | 0.0E+00       | 0.0E+00       | 6.2E-01       | 3.3E-01       | -5.3E-01      | 5.7E-01       | 0.0E+00       |
| 0.0E+00       |

| Specific_Rare |
|---------------|---------------|---------------|---------------|---------------|---------------|---------------|---------------|---------------|---------------|---------------|
| At_F0204      | At_F0226      | At_F0235      | At_F0245      | At_F0251      | At_F0256      | At_F0259      | At_F0262      | At_F0265      | At_F0266      | At_F0274      |
| -             | -             | -             | -             | -             | -             | -             | -             | -             | -             | -             |
| 1.8E-03       | 1.8E-03       | 7.2E-04       | 1.6E-02       | 5.9E-03       | 4.8E-03       | 1.7E-03       | 3.1E-03       | 1.3E-03       | 2.8E-03       | 3.3E-03       |
| 5.3E-03       | 4.3E-03       | 4.5E-04       | 1.5E-02       | 1.0E-02       | 4.9E-03       | 2.3E-03       | 2.0E-03       | 3.7E-03       | 2.5E-03       | 1.6E-03       |
| 8.5E-03       | 2.7E-03       | 1.1E-03       | 1.5E-02       | 1.4E-02       | 2.4E-03       | 1.3E-03       | 3.1E-03       | 1.9E-03       | 6.2E-03       | 5.0E-03       |
| 4.4E-02       | 3.7E-02       | 3.5E-02       | 1.5E-01       | 9.0E-02       | 7.1E-02       | 6.1E-02       | 4.3E-02       | 1.8E-02       | 5.4E-02       | 5.6E-02       |
| 5.2E-02       | 7.4E-02       | 2.7E-02       | 1.3E-01       | 9.6E-02       | 5.7E-02       | 4.1E-02       | 4.7E-02       | 3.8E-02       | 4.7E-02       | 3.5E-02       |
| 7.7E-02       | 4.8E-02       | 4.3E-02       | 2.0E-01       | 9.6E-02       | 4.6E-02       | 3.1E-02       | 4.8E-02       | 3.3E-02       | 6.5E-02       | 5.4E-02       |
| 0.0E+00       | 3.9E+01       | 0.0E+00       | 2.5E+00       | 1.3E+00       | 0.0E+00       | 1.3E+00       | 0.0E+00       | 4.8E+00       | 0.0E+00       | 0.0E+00       |
| 0             | 27            | 0             | 0             | 0             | 0             | 3             | 0             | 0             | 0             | 0             |
| 0             | 3             | 0             | 0             | 0             | 0             | 0             | 0             | 0             | 0             | 0             |
| 0             | 100           | 0             | 100           | 0             | 0             | 0             | 0             | 0             | 0             | 0             |
| 0             | 54            | 0             | 60            | 0             | 0             | 10            | 0             | 0             | 0             | 0             |
| 0             | 33            | 0             | 20            | 6             | 0             | 0             | 0             | 0             | 0             | 0             |
| 0             | 67            | 0             | 33            | 0             | 0             | 0             | 0             | 0             | 0             | 0             |
| 0             | 50            | 0             | 0             | 0             | 0             | 0             | 0             | 0             | 0             | 0             |
| 0             | 17            | 0             | 0             | 0             | 0             | 0             | 0             | 22            | 0             | 0             |
| 0             | 58            | 0             | 0             | 0             | 0             | 0             | 0             | 0             | 0             | 0             |
| 0             | 33            | 0             | 0             | 5             | 0             | 0             | 0             | 0             | 0             | 0             |
| 0             | 77            | 0             | 0             | 0             | 0             | 11            | 0             | 0             | 0             | 0             |
| 0             | 33            | 0             | 29            | 0             | 0             | 0             | 0             | 14            | 0             | 0             |
| 0             | 0             | 0             | 0             | 0             | 0             | 0             | 0             | 0             | 0             | 0             |
| 0             | 0             | 0             | 0             | 0             | 0             | 0             | 0             | 0             | 0             | 0             |
| 0             | 23            | 0             | 0             | 0             | 0             | 0             | 0             | 50            | 0             | 0             |
| 17            | 10            | 0             | 75            | 0             | 0             | 0             | 0             | 50            | 100           | 0             |
| 0             | 50            | 0             | 0             | 0             | 0             | 0             | 0             | 50            | 0             | 0             |
| 0             | 22            | 0             | 25            | 0             | 0             | 0             | 0             | 0             | 0             | 0             |
| 0             | 0             | 0             | 14            | 0             | 0             | 0             | 0             | 0             | 0             | 0             |
| 0             | 20            | 0             | 0             | 0             | 0             | 0             | 0             | 0             | 0             | 0             |
| 0             | 0             | 0             | 0             | 0             | 0             | 0             | 0             | 0             | 0             | 0             |
| 0             | 25            | 0             | 0             | 0             | 0             | 0             | 0             | 0             | 0             | 0             |
| 0             | 23            | 0             | 0             | 0             | 0             | 8             | 0             | 0             | 0             | 0             |
| 0             | 11            | 0             | 0             | 0             | 0             | 0             | 0             | 0             | 0             | 0             |
| 0             | 17            | 0             | 0             | 0             | 0             | 0             | 0             | 0             | 0             | 0             |
| 0             | 0             | 0             | 0             | 0             | 0             | 0             | 0             | 0             | 0             | 0             |
| 0             | 0             | 0             | 0             | 0             | 0             | 0             | 0             | 0             | 0             | 0             |
| 0             | 0             | 0             | 0             | 0             | 0             | 0             | 0             | 0             | 13            | 0             |
| 0             | 0             | 0             | 33            | 0             | 0             | 0             | 0             | 0             | 33            | 0             |
| 0             | 11            | 0             | 0             | 0             | 0             | 0             | 0             | 0             | 0             | 0             |
| 0             | 2             | 0             | 0             | 0             | 0             | 2             | 2             | 1             | 0             | 0             |
| 0             | 3             | 0             | 0             | 0             | 0             | 1             | 0             | 0             | 0             | 0             |
| 0             | 0             | 0             | 0             | 0             | 0             | 0             | 0             | 0             | 0             | 0             |
| 0             | 0             | 4             | 0             | 0             | 0             | 0             | 0             | 0             | 0             | 0             |
| 0             | 0             | 0             | 0             | 0             | 0             | 0             | 0             | 0             | 0             | 0             |
| 0             | 3             | 0             | 0             | 0             | 0             | 0             | 0             | 0             | 0             | 0             |
| 0             | 2             | 0             | 0             | 0             | 0             | 0             | 0             | 0             | 0             | 0             |
| 1             | 2             | 0             | 1             | 0             | 0             | 0             | 0             | 0             | 0             | 0             |
| 0             | 0             | 0             | 0             | 0             | 0             | 0             | 0             | 0             | 0             | 0             |
| 0             | 0             | 7             | 0             | 0             | 0             | 0             | 0             | 4             | 0             | 0             |
| 0             | 0             | 0             | 0             | 0             | 0             | 0             | 0             | 0             | 0             | 2             |
| 0             | 1             | 0             | 0             | 0             | 0             | 0             | 0             | 0             | 0             | 0             |
| 0             | 2             | 0             | 0             | 2             | 0             | 0             | 0             | 0             | 2             | 0             |
| 0             | 0             | 0             | 3             | 0             | 0             | 0             | 16            | 0             | 25            | 0             |
| 8.9E-02       | 2.7E-01       | 1.0E-01       | 3.0E-01       | 1.4E+00       | 1.5E-01       | 8.2E-02       | 1.7E-01       | 8.6E-02       | 6.4E-02       | 7.9E-02       |
| 5.2E-01       | 2.0E-01       | 1.6E-01       | 4.8E-01       | 1.3E-01       | 2.4E-01       | 1.9E-01       | 1.4E-01       | 4.1E-01       | 1.8E-01       | 3.0E-01       |
| 2             | 2             | 0             | 3             | 3             | 2             | 2             | 0             | 0             | 2             | 2             |
| -1.3E+00      | 9.9E-02       | 0.0E+00       | 3.6E-01       | 3.4E-01       | 5.9E-01       | 6.7E-01       | 0.0E+00       | 0.0E+00       | -3.7E+00      | 3.4E-01       |
| 0.0E+00       |

| Specific_Rare |
|---------------|---------------|---------------|---------------|---------------|---------------|---------------|---------------|---------------|---------------|---------------|
| At_F0275      | At_F0282      | At_F0289      | At_F0292      | At_F0299      | At_F0319      | At_F0324      | At_F0327      | At_F0335      | At_F0342      | At_F0363      |
| -             | -             | -             | -             | -             | -             | -             | -             | -             | -             | -             |
| 1.2E-02       | 6.0E-03       | 5.9E-03       | 3.7E-03       | 5.2E-03       | 1.4E-03       | 3.1E-03       | 4.0E-03       | 4.4E-03       | 7.3E-03       | 1.4E-02       |
| 3.4E-03       | 1.6E-03       | 5.1E-03       | 4.7E-03       | 3.9E-03       | 1.3E-03       | 3.4E-03       | 2.7E-03       | 4.8E-03       | 2.1E-03       | 6.4E-03       |
| 2.5E-03       | 5.7E-03       | 4.2E-03       | 9.5E-03       | 3.6E-03       | 8.1E-03       | 1.8E-03       | 7.3E-03       | 2.4E-03       | 4.5E-03       | 1.2E-02       |
| 1.6E-01       | 9.0E-02       | 9.9E-02       | 1.2E-01       | 4.5E-02       | 1.8E-02       | 5.0E-02       | 8.5E-02       | 4.7E-02       | 5.2E-02       | 1.2E-01       |
| 5.7E-02       | 3.1E-02       | 4.7E-02       | 6.7E-02       | 6.2E-02       | 1.3E-02       | 5.5E-02       | 8.7E-02       | 5.5E-02       | 4.0E-02       | 9.4E-02       |
| 8.8E-02       | 6.8E-02       | 6.2E-02       | 1.1E-01       | 4.6E-02       | 4.6E-02       | 5.2E-02       | 1.9E-01       | 5.7E-02       | 5.0E-02       | 1.0E-01       |
| 4.7E+00       | 3.0E+01       | 0.0E+00       | 0.0E+00       | 0.0E+00       | 0.0E+00       | 1.2E+01       | 2.1E+00       | 4.9E+00       | 1.3E+00       | 0.0E+00       |
| 0             | 56            | 0             | 0             | 0             | 0             | 8             | 0             | 0             | 0             | 0             |
| 1             | 6             | 0             | 0             | 0             | 0             | 2             | 0             | 0             | 0             | 0             |
| 75            | 60            | 0             | 0             | 0             | 0             | 0             | 0             | 0             | 0             | 0             |
| 55            | 83            | 0             | 0             | 0             | 0             | 0             | 0             | 0             | 0             | 0             |
| 45            | 0             | 0             | 0             | 0             | 0             | 0             | 0             | 0             | 0             | 12            |
| 17            | 50            | 0             | 0             | 0             | 0             | 0             | 0             | 0             | 0             | 0             |
| 0             | 0             | 0             | 0             | 0             | 0             | 0             | 33            | 0             | 0             | 0             |
| 0             | 0             | 0             | 0             | 0             | 0             | 0             | 0             | 10            | 0             | 0             |
| 0             | 38            | 0             | 0             | 0             | 0             | 0             | 0             | 0             | 6             | 0             |
| 0             | 25            | 0             | 0             | 0             | 0             | 25            | 9             | 14            | 0             | 0             |
| 0             | 13            | 0             | 0             | 0             | 0             | 40            | 0             | 0             | 0             | 0             |
| 63            | 100           | 0             | 0             | 0             | 0             | 0             | 0             | 0             | 0             | 0             |
| 50            | 100           | 0             | 0             | 0             | 0             | 0             | 0             | 0             | 0             | 0             |
| 0             | 14            | 0             | 0             | 0             | 0             | 0             | 0             | 0             | 0             | 0             |
| 38            | 9             | 29            | 0             | 0             | 0             | 0             | 0             | 0             | 0             | 0             |
| 71            | 50            | 7             | 0             | 0             | 33            | 0             | 0             | 0             | 0             | 0             |
| 0             | 25            | 0             | 0             | 0             | 0             | 9             | 67            | 0             | 0             | 0             |
| 50            | 17            | 0             | 0             | 0             | 0             | 0             | 0             | 0             | 0             | 0             |
| 23            | 38            | 0             | 0             | 0             | 0             | 0             | 0             | 0             | 0             | 0             |
| 50            | 0             | 0             | 0             | 0             | 0             | 0             | 0             | 0             | 0             | 0             |
| 25            | 0             | 0             | 0             | 0             | 0             | 0             | 0             | 0             | 0             | 0             |
| 0             | 0             | 0             | 0             | 0             | 0             | 0             | 0             | 0             | 0             | 0             |
| 0             | 0             | 0             | 0             | 0             | 0             | 0             | 0             | 0             | 0             | 0             |
| 0             | 7             | 0             | 0             | 0             | 0             | 0             | 0             | 0             | 0             | 0             |
| 0             | 32            | 0             | 0             | 0             | 0             | 13            | 0             | 0             | 0             | 0             |
| 0             | 21            | 0             | 0             | 0             | 0             | 0             | 0             | 0             | 0             | 0             |
| 0             | 80            | 0             | 0             | 0             | 0             | 0             | 0             | 0             | 0             | 0             |
| 0             | 100           | 0             | 0             | 0             | 0             | 0             | 0             | 0             | 0             | 0             |
| 0             | 70            | 0             | 0             | 0             | 0             | 0             | 0             | 0             | 0             | 0             |
| 0             | 0             | 0             | 0             | 0             | 0             | 0             | 0             | 0             | 0             | 0             |
| 0             | 22            | 0             | 0             | 0             | 0             | 0             | 0             | 0             | 0             | 0             |
| 0             | 29            | 0             | 0             | 0             | 0             | 0             | 0             | 0             | 0             | 0             |
| 0             | 4             | 0             | 0             | 0             | 0             | 0             | 0             | 0             | 0             | 0             |
| 32            | 4             | 0             | 0             | 0             | 0             | 0             | 0             | 0             | 0             | 0             |
| 23            | 0             | 0             | 0             | 0             | 0             | 0             | 0             | 0             | 0             | 0             |
| 11            | 0             | 0             | 0             | 0             | 0             | 0             | 0             | 0             | 0             | 0             |
| 0             | 0             | 0             | 0             | 0             | 0             | 0             | 0             | 0             | 0             | 0             |
| 2             | 0             | 0             | 0             | 0             | 0             | 0             | 0             | 0             | 0             | 0             |
| 0             | 3             | 0             | 0             | 0             | 0             | 0             | 0             | 0             | 0             | 0             |
| 0             | 4             | 0             | 0             | 0             | 0             | 4             | 0             | 0             | 0             | 0             |
| 0             | 3             | 0             | 0             | 0             | 0             | 0             | 0             | 0             | 0             | 0             |
| 0             | 13            | 0             | 0             | 0             | 0             | 0             | 0             | 0             | 0             | 0             |
| 0             | 23            | 0             | 0             | 0             | 10            | 0             | 0             | 0             | 0             | 0             |
| 0             | 5             | 0             | 0             | 0             | 0             | 0             | 0             | 0             | 0             | 0             |
| 0             | 2             | 0             | 2             | 0             | 0             | 0             | 0             | 1             | 0             | 0             |
| 0             | 6             | 0             | 0             | 0             | 0             | 0             | 0             | 0             | 0             | 0             |
| 0             | 10            | 0             | 0             | 0             | 0             | 0             | 35            | 0             | 0             | 0             |
| 6.6E-02       | 1.0E-01       | 6.0E-02       | 1.6E-01       | 0.0E+00       | 7.8E-02       | 2.1E-01       | 2.6E-01       | 4.5E-02       | 1.1E-01       | 6.6E-01       |
| 2.2E-01       | 1.9E-01       | 1.9E-01       | 8.9E-02       | 2.9E-01       | 2.4E-01       | 1.6E-01       | 1.3E-01       | 8.3E-02       | 3.6E-01       | 2.0E-01       |
| 2             | 3             | 2             | 2             | 2             | 4             | 2             | 3             | 2             | 2             | 2             |
| -1.2E+00      | 7.1E-01       | 4.2E-01       | 4.1E-01       | -1.6E-01      | -6.3E-01      | -2.5E-01      | 3.2E-01       | -3.3E-01      | 1.9E-01       | 5.3E-01       |
| 0.0E+00       |

| Specific_Rare |
|---------------|---------------|---------------|---------------|---------------|---------------|---------------|---------------|---------------|---------------|---------------|
| At_F0378      | At_F0381      | At_F0385      | At_F0392      | At_F0393      | At_F0399      | At_F0400      | At_F0401      | At_F0415      | At_F0419      | At_F0432      |
| -             | -             | -             | -             | -             | bm            | -             | -             | -             | -             | -             |
| 5.5E-03       | 1.2E-02       | 2.8E-03       | 1.5E-02       | 1.8E-03       | 3.3E-03       | 1.1E-02       | 5.4E-03       | 4.9E-03       | 4.5E-03       | 2.5E-03       |
| 6.3E-03       | 2.0E-03       | 2.9E-03       | 6.4E-03       | 1.9E-03       | 1.9E-03       | 8.7E-03       | 1.0E-02       | 9.4E-03       | 9.6E-03       | 2.5E-03       |
| 8.4E-03       | 6.4E-03       | 9.5E-04       | 2.3E-03       | 3.4E-03       | 2.7E-03       | 3.9E-03       | 1.3E-02       | 1.1E-02       | 1.8E-02       | 1.0E-03       |
| 7.9E-02       | 8.0E-02       | 4.7E-02       | 1.0E-01       | 5.3E-02       | 7.7E-02       | 5.5E-02       | 8.7E-02       | 9.4E-02       | 4.6E-02       | 4.2E-02       |
| 7.0E-02       | 4.0E-02       | 6.3E-02       | 6.6E-02       | 4.6E-02       | 4.5E-02       | 5.9E-02       | 1.2E-01       | 1.4E-01       | 4.8E-02       | 3.7E-02       |
| 1.5E-01       | 6.5E-02       | 2.1E-02       | 5.0E-02       | 4.7E-02       | 5.3E-02       | 1.2E-01       | 1.1E-01       | 1.2E-01       | 7.9E-02       | 3.6E-02       |
| 0.0E+00       | 0.0E+00       | 0.0E+00       | 1.7E+00       | 0.0E+00       | 2.5E+01       | 0.0E+00       | 0.0E+00       | 0.0E+00       | 0.0E+00       | 0.0E+00       |
| 2             | 0             | 0             | 0             | 0             | 12            | 5             | 0             | 3             | 0             | 0             |
| 1             | 0             | 0             | 0             | 0             | 2             | 2             | 0             | 2             | 0             | 0             |
| 0             | 0             | 0             | 50            | 0             | 0             | 0             | 0             | 0             | 0             | 0             |
| 0             | 0             | 0             | 0             | 0             | 0             | 0             | 0             | 0             | 0             | 0             |
| 0             | 0             | 0             | 0             | 0             | 38            | 0             | 0             | 0             | 0             | 0             |
| 0             | 0             | 0             | 0             | 0             | 80            | 0             | 0             | 0             | 0             | 0             |
| 0             | 0             | 0             | 13            | 0             | 83            | 0             | 0             | 0             | 0             | 0             |
| 0             | 0             | 0             | 0             | 0             | 56            | 0             | 0             | 0             | 0             | 0             |
| 0             | 0             | 0             | 0             | 0             | 16            | 0             | 0             | 0             | 0             | 0             |
| 0             | 0             | 0             | 0             | 0             | 8             | 0             | 0             | 0             | 0             | 0             |
| 0             | 0             | 0             | 0             | 0             | 0             | 0             | 0             | 0             | 0             | 0             |
| 0             | 0             | 25            | 0             | 0             | 0             | 17            | 0             | 0             | 0             | 0             |
| 75            | 0             | 0             | 0             | 0             | 0             | 11            | 0             | 0             | 0             | 0             |
| 67            | 0             | 4             | 0             | 0             | 0             | 50            | 0             | 0             | 0             | 0             |
| 0             | 25            | 31            | 0             | 0             | 0             | 73            | 0             | 0             | 0             | 0             |
| 0             | 100           | 40            | 0             | 0             | 0             | 50            | 0             | 0             | 0             | 0             |
| 0             | 0             | 0             | 0             | 0             | 0             | 0             | 0             | 17            | 0             | 0             |
| 0             | 0             | 0             | 0             | 0             | 0             | 0             | 0             | 0             | 0             | 0             |
| 0             | 0             | 0             | 0             | 0             | 50            | 0             | 0             | 0             | 0             | 0             |
| 0             | 0             | 0             | 0             | 0             | 0             | 0             | 0             | 0             | 0             | 0             |
| 0             | 0             | 0             | 0             | 0             | 100           | 33            | 0             | 0             | 0             | 0             |
| 8             | 0             | 0             | 0             | 0             | 100           | 0             | 0             | 0             | 0             | 0             |
| 0             | 0             | 0             | 0             | 0             | 0             | 0             | 0             | 11            | 0             | 0             |
| 0             | 0             | 0             | 0             | 0             | 0             | 0             | 0             | 0             | 0             | 0             |
| 0             | 0             | 0             | 0             | 0             | 0             | 0             | 0             | 0             | 0             | 0             |
| 0             | 0             | 0             | 0             | 0             | 0             | 40            | 0             | 0             | 0             | 0             |
| 0             | 0             | 0             | 0             | 0             | 0             | 0             | 0             | 0             | 0             | 0             |
| 83            | 0             | 0             | 0             | 0             | 0             | 0             | 0             | 0             | 0             | 0             |
| 17            | 0             | 0             | 0             | 0             | 0             | 21            | 0             | 0             | 0             | 0             |
| 0             | 0             | 0             | 0             | 0             | 0             | 41            | 0             | 0             | 0             | 0             |
| 0             | 0             | 0             | 0             | 0             | 0             | 91            | 0             | 0             | 0             | 0             |
| 0             | 0             | 0             | 0             | 0             | 0             | 0             | 0             | 0             | 0             | 0             |
| 0             | 0             | 0             | 0             | 0             | 17            | 0             | 0             | 0             | 1             | 0             |
| 0             | 0             | 0             | 3             | 0             | 0             | 0             | 0             | 0             | 0             | 0             |
| 0             | 0             | 0             | 0             | 0             | 22            | 9             | 0             | 0             | 0             | 0             |
| 2             | 0             | 0             | 0             | 0             | 9             | 0             | 0             | 0             | 0             | 0             |
| 0             | 0             | 0             | 0             | 0             | 0             | 0             | 0             | 0             | 0             | 0             |
| 0             | 0             | 0             | 0             | 0             | 0             | 3             | 0             | 0             | 0             | 0             |
| 0             | 0             | 0             | 0             | 0             | 0             | 6             | 0             | 9             | 0             | 0             |
| 0             | 0             | 0             | 0             | 0             | 0             | 11            | 0             | 0             | 0             | 0             |
| 42            | 0             | 0             | 0             | 0             | 2             | 2             | 0             | 0             | 0             | 0             |
| 3             | 0             | 0             | 0             | 1             | 0             | 11            | 0             | 0             | 0             | 0             |
| 2             | 0             | 0             | 0             | 0             | 0             | 0             | 0             | 0             | 0             | 0             |
| 0             | 7             | 0             | 0             | 0             | 5             | 21            | 0             | 0             | 0             | 0             |
| 5.5E-01       | 8.2E-02       | 3.0E+00       | 5.3E-02       | 1.4E-01       | 2.2E-01       | 4.8E+00       | 1.2E+00       | 2.1E-01       | 2.4E-01       | 1.0E-01       |
| 3.8E-01       | 1.7E-01       | 3.9E-01       | 6.5E-02       | 4.3E-01       | 6.0E-02       | 1.3E-01       | 2.6E-01       | 1.6E-01       | 3.7E-01       | 2.8E-01       |
| 2             | 2             | 0             | 0             | 1             | 0             | 0             | 0             | 0             | 0             | 2             |
| 5.5E-01       | 1.3E-02       | 0.0E+00       | 1.7E-01       |
| 0.0E+00       |



| Specific_Rare |
|---------------|---------------|---------------|---------------|---------------|---------------|---------------|---------------|---------------|---------------|---------------|---------------|
| At_F0436      | At_F0444      | At_F0448      | At_F0455      | At_F0458      | At_F0462      | At_F0464      | At_F0471      | At_F0481      | At_F0494      | At_F0503      |               |
| -             | -             | -             | -             | -             | -             | -             | -             | -             | -             | -             | -             |
| 7.6E-03       | 1.1E-03       | 1.1E-02       | 3.7E-03       | 4.8E-03       | 7.4E-03       | 4.0E-03       | 6.5E-03       | 1.7E-03       | 2.2E-03       | 1.2E-02       |               |
| 2.7E-03       | 2.4E-03       | 1.0E-02       | 4.3E-03       | 3.1E-03       | 2.9E-03       | 5.6E-03       | 3.8E-03       | 4.8E-04       | 6.0E-03       | 7.3E-03       |               |
| 5.1E-03       | 4.2E-03       | 1.5E-02       | 4.1E-03       | 4.2E-03       | 3.5E-03       | 3.4E-03       | 4.5E-03       | 7.9E-04       | 6.0E-03       | 1.0E-02       |               |
| 6.5E-02       | 2.8E-02       | 9.5E-02       | 7.8E-02       | 6.0E-02       | 8.7E-02       | 6.3E-02       | 1.5E-01       | 3.6E-02       | 6.1E-02       | 1.1E-01       |               |
| 6.1E-02       | 2.8E-02       | 8.0E-02       | 5.3E-02       | 6.4E-02       | 5.4E-02       | 5.3E-02       | 7.4E-02       | 3.3E-02       | 6.1E-02       | 7.9E-02       |               |
| 5.5E-02       | 5.2E-02       | 1.2E-01       | 1.1E-01       | 8.5E-02       | 6.1E-02       | 5.6E-02       | 8.0E-02       | 3.8E-02       | 7.8E-02       | 1.8E-01       |               |
| 1.2E+01       | 4.8E+00       | 0.0E+00       | 6.4E+00       | 0.0E+00       | 0.0E+00       | 0.0E+00       | 4.2E+00       | 1.4E+00       | 1.4E+00       | 7.9E+00       |               |
| 11            | 0             | 0             | 0             | 0             | 0             | 0             | 4             | 0             | 0             | 0             |               |
| 2             | 2             | 0             | 1             | 0             | 1             | 0             | 1             | 1             | 0             | 0             |               |
| 0             | 0             | 0             | 0             | 0             | 0             | 0             | 100           | 0             | 0             | 0             |               |
| 0             | 11            | 0             | 0             | 17            | 0             | 0             | 0             | 0             | 0             | 0             |               |
| 0             | 18            | 0             | 0             | 0             | 0             | 0             | 0             | 0             | 5             | 0             |               |
| 0             | 0             | 0             | 0             | 0             | 0             | 0             | 0             | 0             | 0             | 0             |               |
| 0             | 0             | 0             | 0             | 0             | 0             | 0             | 0             | 0             | 0             | 0             |               |
| 0             | 0             | 0             | 0             | 0             | 0             | 0             | 18            | 0             | 0             | 0             |               |
| 0             | 0             | 0             | 8             | 0             | 0             | 0             | 0             | 6             | 6             | 23            |               |
| 10            | 7             | 0             | 0             | 0             | 0             | 0             | 0             | 0             | 0             | 13            |               |
| 0             | 22            | 0             | 6             | 0             | 0             | 0             | 0             | 0             | 0             | 0             |               |
| 100           | 0             | 0             | 0             | 0             | 0             | 0             | 13            | 0             | 0             | 0             |               |
| 100           | 0             | 0             | 0             | 0             | 0             | 0             | 0             | 0             | 0             | 0             |               |
| 0             | 0             | 0             | 50            | 0             | 0             | 0             | 0             | 0             | 0             | 0             |               |
| 0             | 0             | 0             | 0             | 21            | 0             | 0             | 0             | 0             | 0             | 17            |               |
| 0             | 0             | 0             | 0             | 0             | 0             | 10            | 0             | 0             | 0             | 20            |               |
| 0             | 0             | 0             | 0             | 0             | 0             | 0             | 0             | 0             | 0             | 100           |               |
| 0             | 0             | 0             | 0             | 0             | 0             | 0             | 75            | 0             | 0             | 0             |               |
| 0             | 0             | 0             | 0             | 0             | 0             | 0             | 0             | 0             | 0             | 0             |               |
| 0             | 0             | 0             | 0             | 0             | 0             | 0             | 0             | 0             | 0             | 0             |               |
| 0             | 0             | 0             | 0             | 0             | 0             | 0             | 0             | 0             | 0             | 0             |               |
| 0             | 0             | 0             | 0             | 0             | 0             | 0             | 0             | 0             | 0             | 0             |               |
| 0             | 0             | 0             | 0             | 0             | 0             | 0             | 0             | 0             | 0             | 0             |               |
| 0             | 0             | 0             | 0             | 0             | 0             | 0             | 8             | 0             | 0             | 0             |               |
| 50            | 0             | 0             | 0             | 0             | 0             | 0             | 0             | 0             | 0             | 0             |               |
| 50            | 0             | 0             | 0             | 0             | 0             | 0             | 0             | 0             | 0             | 0             |               |
| 0             | 0             | 13            | 11            | 0             | 0             | 0             | 0             | 0             | 0             | 0             |               |
| 0             | 0             | 0             | 0             | 0             | 0             | 0             | 0             | 0             | 11            | 22            |               |
| 0             | 0             | 0             | 0             | 0             | 0             | 0             | 0             | 0             | 0             | 14            |               |
| 0             | 0             | 0             | 0             | 0             | 0             | 0             | 0             | 0             | 0             | 100           |               |
| 0             | 5             | 0             | 0             | 0             | 0             | 0             | 12            | 0             | 0             | 0             |               |
| 0             | 0             | 0             | 0             | 8             | 2             | 0             | 0             | 0             | 0             | 0             |               |
| 0             | 0             | 0             | 1             | 0             | 0             | 0             | 0             | 0             | 0             | 0             |               |
| 0             | 0             | 0             | 0             | 0             | 0             | 0             | 0             | 0             | 0             | 0             |               |
| 0             | 4             | 0             | 3             | 0             | 4             | 0             | 0             | 0             | 0             | 0             |               |
| 0             | 0             | 0             | 2             | 0             | 0             | 0             | 2             | 0             | 0             | 0             |               |
| 0             | 2             | 0             | 0             | 0             | 0             | 0             | 0             | 0             | 0             | 0             |               |
| 0             | 0             | 0             | 0             | 0             | 1             | 0             | 0             | 0             | 0             | 0             |               |
| 0             | 0             | 0             | 0             | 0             | 0             | 0             | 0             | 0             | 0             | 0             |               |
| 9             | 3             | 0             | 0             | 0             | 0             | 0             | 0             | 4             | 0             | 0             |               |
| 0             | 0             | 0             | 6             | 0             | 0             | 0             | 0             | 0             | 0             | 0             |               |
| 0             | 0             | 0             | 5             | 0             | 0             | 0             | 0             | 0             | 0             | 0             |               |
| 0             | 0             | 0             | 0             | 0             | 0             | 0             | 0             | 0             | 5             | 17            |               |
| 0             | 2             | 0             | 0             | 0             | 0             | 0             | 0             | 0             | 0             | 20            |               |
| 0             | 0             | 0             | 0             | 0             | 0             | 0             | 0             | 0             | 0             | 100           |               |
| 3.1E-01       | 7.1E-02       | 8.3E-01       | 7.0E-01       | 7.4E-02       | 2.4E-01       | 1.4E+00       | 3.9E-01       | 8.8E-01       | 7.9E-02       | 9.3E-01       |               |
| 2.5E-01       | 2.3E-01       | 3.5E-01       | 2.8E-01       | 2.3E-01       | 3.2E-01       | 1.4E-01       | 1.9E-01       | 4.3E-01       | 4.2E-01       | 2.5E-01       |               |
| 2             | 2             | 2             | 2             | 2             | 2             | 4             | 0             | 2             | 2             | 2             |               |
| 8.5E-01       | -7.8E-02      | 2.0E-01       | -3.6E-01      | -5.5E-01      | 7.5E-02       | 4.5E-01       | 0.0E+00       | -6.2E-01      | 3.2E-01       | -5.2E-02      |               |
| 0.0E+00       |               |

| Specific_Rare |
|---------------|---------------|---------------|---------------|---------------|---------------|---------------|---------------|---------------|---------------|---------------|
| At_F0504      | At_F0512      | At_F0513      | At_F0517      | At_F0521      | At_F0524      | At_F0528      | At_F0546      | At_F0550      | At_F0551      | At_F0567      |
| -             | -             | -             | -             | -             | -             | -             | -             | -             | -             | -             |
| 6.1E-03       | 1.0E-02       | 2.7E-03       | 1.6E-03       | 2.5E-03       | 6.3E-03       | 3.6E-03       | 4.7E-03       | 2.2E-03       | 3.8E-03       | 1.5E-03       |
| 7.4E-03       | 9.9E-03       | 8.3E-03       | 3.2E-03       | 1.4E-03       | 1.0E-02       | 1.6E-03       | 4.7E-03       | 3.6E-03       | 4.1E-03       | 4.1E-03       |
| 3.1E-03       | 6.9E-03       | 6.1E-03       | 4.5E-03       | 2.1E-03       | 7.0E-03       | 2.9E-03       | 2.3E-03       | 1.8E-03       | 5.9E-03       | 4.5E-03       |
| 1.0E-01       | 9.4E-02       | 5.4E-02       | 3.6E-02       | 3.8E-02       | 1.0E-01       | 4.9E-02       | 5.5E-02       | 3.7E-02       | 6.2E-02       | 4.7E-02       |
| 1.6E-01       | 1.0E-01       | 9.4E-02       | 4.3E-02       | 4.1E-02       | 8.7E-02       | 4.1E-02       | 6.1E-02       | 6.2E-02       | 4.7E-02       | 4.4E-02       |
| 5.5E-02       | 9.7E-02       | 1.1E-01       | 4.9E-02       | 4.6E-02       | 6.8E-02       | 5.7E-02       | 4.6E-02       | 4.1E-02       | 1.2E-01       | 5.8E-02       |
| 4.7E+01       | 0.0E+00       | 8.5E-01       | 1.6E+00       | 0.0E+00       | 0.0E+00       | 5.0E+00       | 2.4E+01       | 1.2E+01       | 1.3E+00       | 0.0E+00       |
| 74            | 0             | 0             | 0             | 0             | 0             | 0             | 51            | 7             | 0             | 0             |
| 4             | 0             | 1             | 1             | 0             | 1             | 0             | 3             | 0             | 0             | 0             |
| 100           | 0             | 0             | 0             | 0             | 0             | 0             | 0             | 0             | 0             | 29            |
| 29            | 0             | 0             | 0             | 0             | 50            | 0             | 0             | 0             | 0             | 0             |
| 60            | 0             | 0             | 0             | 0             | 0             | 0             | 0             | 0             | 0             | 0             |
| 0             | 0             | 8             | 0             | 0             | 0             | 0             | 0             | 38            | 8             | 0             |
| 0             | 0             | 0             | 33            | 0             | 0             | 0             | 0             | 100           | 0             | 0             |
| 100           | 0             | 0             | 0             | 0             | 0             | 0             | 0             | 0             | 0             | 0             |
| 80            | 0             | 0             | 0             | 0             | 0             | 0             | 7             | 19            | 0             | 0             |
| 12            | 0             | 3             | 0             | 0             | 0             | 0             | 29            | 18            | 0             | 0             |
| 33            | 0             | 0             | 0             | 0             | 0             | 20            | 20            | 28            | 7             | 0             |
| 100           | 0             | 0             | 25            | 0             | 0             | 40            | 92            | 0             | 0             | 0             |
| 0             | 0             | 0             | 0             | 0             | 0             | 0             | 0             | 0             | 0             | 0             |
| 0             | 0             | 0             | 0             | 0             | 0             | 0             | 0             | 0             | 0             | 0             |
| 0             | 0             | 0             | 0             | 0             | 0             | 0             | 0             | 0             | 5             | 0             |
| 0             | 0             | 0             | 0             | 0             | 0             | 0             | 0             | 0             | 0             | 0             |
| 0             | 0             | 0             | 14            | 0             | 0             | 0             | 0             | 0             | 24            | 0             |
| 100           | 0             | 0             | 0             | 0             | 50            | 0             | 0             | 0             | 0             | 0             |
| 20            | 0             | 0             | 0             | 0             | 50            | 0             | 0             | 0             | 0             | 0             |
| 0             | 0             | 0             | 0             | 0             | 0             | 0             | 0             | 0             | 0             | 0             |
| 0             | 0             | 0             | 0             | 0             | 0             | 0             | 12            | 0             | 0             | 0             |
| 0             | 0             | 0             | 0             | 0             | 0             | 0             | 0             | 17            | 0             | 0             |
| 80            | 0             | 0             | 0             | 0             | 0             | 0             | 0             | 0             | 0             | 0             |
| 45            | 0             | 0             | 0             | 0             | 0             | 0             | 0             | 0             | 0             | 0             |
| 31            | 0             | 0             | 0             | 0             | 0             | 0             | 27            | 12            | 0             | 0             |
| 67            | 0             | 0             | 0             | 0             | 0             | 0             | 29            | 0             | 0             | 0             |
| 0             | 0             | 0             | 0             | 0             | 0             | 0             | 78            | 0             | 0             | 0             |
| 0             | 0             | 0             | 0             | 0             | 0             | 0             | 50            | 0             | 0             | 0             |
| 0             | 0             | 0             | 0             | 0             | 0             | 20            | 0             | 0             | 0             | 0             |
| 0             | 0             | 0             | 0             | 0             | 0             | 0             | 0             | 0             | 0             | 0             |
| 0             | 0             | 0             | 0             | 0             | 0             | 0             | 0             | 0             | 0             | 0             |
| 0             | 0             | 0             | 0             | 0             | 0             | 0             | 0             | 0             | 22            | 0             |
| 40            | 0             | 0             | 0             | 0             | 0             | 0             | 0             | 0             | 0             | 0             |
| 0             | 0             | 0             | 2             | 0             | 0             | 0             | 0             | 0             | 0             | 0             |
| 0             | 0             | 0             | 0             | 0             | 0             | 0             | 0             | 0             | 0             | 0             |
| 0             | 0             | 0             | 0             | 0             | 0             | 0             | 2             | 0             | 0             | 0             |
| 0             | 0             | 0             | 0             | 0             | 0             | 0             | 0             | 0             | 0             | 0             |
| 2             | 0             | 2             | 0             | 0             | 0             | 0             | 3             | 0             | 0             | 0             |
| 1             | 0             | 0             | 2             | 0             | 1             | 0             | 0             | 0             | 0             | 0             |
| 3             | 0             | 0             | 0             | 0             | 1             | 0             | 0             | 1             | 0             | 0             |
| 3             | 0             | 0             | 0             | 0             | 0             | 0             | 5             | 0             | 0             | 0             |
| 0             | 0             | 0             | 0             | 0             | 3             | 2             | 10            | 0             | 0             | 0             |
| 0             | 0             | 0             | 0             | 0             | 0             | 0             | 0             | 0             | 0             | 0             |
| 0             | 0             | 0             | 0             | 0             | 0             | 0             | 0             | 0             | 0             | 0             |
| 0             | 0             | 0             | 0             | 0             | 0             | 0             | 0             | 0             | 11            | 0             |
| 2             | 0             | 0             | 0             | 0             | 0             | 0             | 2             | 0             | 0             | 0             |
| 0             | 0             | 0             | 0             | 0             | 0             | 0             | 0             | 0             | 4             | 0             |
| 1.4E+00       | 7.2E-01       | 2.0E-01       | 6.0E-01       | 9.4E-02       | 4.0E+00       | 2.9E-01       | 5.2E-01       | 1.5E+00       | 6.3E-02       | 6.2E-02       |
| 4.0E-02       | 3.7E-01       | 3.0E-01       | 3.4E-02       | 2.8E-01       | 3.9E-01       | 4.3E-01       | 1.3E-01       | 2.2E-01       | 4.6E-01       | 4.4E-01       |
| 2             | 0             | 2             | 2             | 2             | 2             | 1             | 0             | 2             | 1             | 0             |
| -7.8E-01      | 0.0E+00       | -9.6E-02      | -7.6E-01      | 8.0E-01       | 7.0E-01       | 0.0E+00       | 0.0E+00       | -1.3E+00      | 0.0E+00       | 0.0E+00       |
| 0.0E+00       |

| Specific_Rare |
|---------------|---------------|---------------|---------------|---------------|---------------|---------------|---------------|---------------|---------------|---------------|---------------|
| At_F0572      | At_F0573      | At_F0576      | At_F0580      | At_F0592      | At_F0599      | At_F0600      | At_F0633      | At_F0635      | At_F0636      | At_F0644      |               |
| -             | -             | -             | -             | -             | -             | -             | -             | -             | -             | -             | -             |
| 9.2E-03       | 4.9E-03       | 1.2E-02       | 1.9E-03       | 1.1E-02       | 8.3E-03       | 4.1E-03       | 1.8E-02       | 7.3E-03       | 5.6E-03       | 1.1E-02       |               |
| 8.9E-03       | 6.9E-03       | 1.1E-02       | 3.6E-03       | 5.6E-03       | 3.5E-03       | 4.2E-03       | 1.9E-02       | 6.9E-03       | 6.1E-03       | 5.3E-03       |               |
| 1.2E-02       | 1.1E-02       | 1.7E-02       | 2.3E-03       | 6.6E-03       | 7.2E-03       | 7.7E-03       | 9.5E-03       | 4.9E-03       | 3.7E-03       | 7.9E-03       |               |
| 7.5E-02       | 8.2E-02       | 1.9E-01       | 6.6E-02       | 1.6E-01       | 5.8E-02       | 5.9E-02       | 1.3E-01       | 8.2E-02       | 6.8E-02       | 1.9E-01       |               |
| 5.9E-02       | 5.9E-02       | 8.6E-02       | 6.4E-02       | 1.3E-01       | 4.1E-02       | 4.8E-02       | 1.1E-01       | 5.5E-02       | 6.5E-02       | 1.0E-01       |               |
| 1.1E-01       | 7.2E-02       | 1.6E-01       | 6.3E-02       | 8.2E-02       | 1.3E-01       | 1.1E-01       | 6.1E-02       | 7.8E-02       | 7.5E-02       | 1.3E-01       |               |
| 7.3E+00       | 0.0E+00       | 1.3E+00       | 0.0E+00       | 3.3E+00       | 0.0E+00       | 0.0E+00       | 0.0E+00       | 0.0E+00       | 4.7E+00       | 1.6E+01       |               |
| 0             | 0             | 0             | 0             | 0             | 0             | 0             | 0             | 0             | 2             | 4             |               |
| 0             | 1             | 0             | 0             | 0             | 0             | 0             | 0             | 1             | 0             | 1             |               |
| 0             | 0             | 50            | 0             | 0             | 0             | 0             | 0             | 0             | 0             | 0             |               |
| 0             | 0             | 75            | 0             | 0             | 0             | 0             | 0             | 0             | 0             | 0             |               |
| 0             | 0             | 14            | 0             | 0             | 0             | 0             | 0             | 0             | 0             | 0             |               |
| 0             | 0             | 46            | 0             | 0             | 0             | 0             | 0             | 0             | 0             | 0             |               |
| 80            | 17            | 0             | 0             | 0             | 0             | 0             | 0             | 0             | 0             | 20            |               |
| 0             | 0             | 0             | 0             | 0             | 0             | 0             | 0             | 0             | 0             | 0             |               |
| 0             | 0             | 0             | 0             | 0             | 0             | 0             | 0             | 0             | 12            | 10            |               |
| 17            | 0             | 5             | 0             | 6             | 0             | 0             | 0             | 0             | 6             | 26            |               |
| 6             | 0             | 0             | 0             | 8             | 0             | 0             | 0             | 0             | 0             | 25            |               |
| 14            | 0             | 0             | 0             | 0             | 0             | 0             | 0             | 0             | 0             | 45            |               |
| 0             | 0             | 0             | 0             | 0             | 0             | 75            | 0             | 0             | 0             | 0             |               |
| 75            | 0             | 0             | 0             | 0             | 50            | 0             | 27            | 0             | 20            | 0             |               |
| 0             | 0             | 0             | 0             | 0             | 13            | 5             | 0             | 0             | 0             | 50            |               |
| 0             | 0             | 0             | 0             | 0             | 38            | 29            | 0             | 0             | 0             | 0             |               |
| 0             | 0             | 0             | 0             | 0             | 0             | 100           | 0             | 0             | 0             | 0             |               |
| 0             | 0             | 0             | 0             | 0             | 0             | 0             | 0             | 0             | 0             | 0             |               |
| 0             | 0             | 0             | 0             | 0             | 0             | 0             | 0             | 0             | 0             | 0             |               |
| 0             | 0             | 0             | 0             | 0             | 0             | 0             | 0             | 0             | 0             | 0             |               |
| 0             | 0             | 36            | 0             | 0             | 0             | 0             | 0             | 0             | 0             | 0             |               |
| 0             | 0             | 0             | 0             | 0             | 0             | 0             | 0             | 0             | 0             | 0             |               |
| 0             | 0             | 0             | 0             | 0             | 0             | 0             | 0             | 0             | 0             | 0             |               |
| 0             | 0             | 0             | 0             | 0             | 0             | 0             | 0             | 0             | 6             | 15            |               |
| 0             | 0             | 0             | 0             | 0             | 0             | 0             | 0             | 0             | 0             | 8             |               |
| 0             | 0             | 0             | 0             | 0             | 0             | 0             | 0             | 6             | 0             | 27            |               |
| 0             | 0             | 0             | 0             | 0             | 0             | 0             | 0             | 0             | 0             | 14            |               |
| 0             | 0             | 0             | 0             | 0             | 0             | 0             | 0             | 0             | 0             | 0             |               |
| 10            | 0             | 0             | 0             | 0             | 8             | 0             | 0             | 0             | 0             | 0             |               |
| 31            | 0             | 0             | 0             | 0             | 40            | 0             | 0             | 0             | 0             | 0             |               |
| 0             | 0             | 0             | 0             | 0             | 44            | 19            | 0             | 0             | 0             | 0             |               |
| 0             | 0             | 0             | 0             | 0             | 20            | 75            | 0             | 0             | 0             | 0             |               |
| 0             | 0             | 0             | 0             | 0             | 0             | 0             | 0             | 0             | 0             | 0             |               |
| 0             | 0             | 0             | 0             | 0             | 0             | 0             | 0             | 2             | 0             | 0             |               |
| 0             | 0             | 0             | 0             | 0             | 0             | 0             | 0             | 0             | 0             | 0             |               |
| 0             | 0             | 13            | 0             | 0             | 0             | 0             | 0             | 0             | 0             | 0             |               |
| 0             | 0             | 0             | 0             | 0             | 0             | 0             | 0             | 0             | 0             | 0             |               |
| 0             | 3             | 0             | 0             | 0             | 0             | 0             | 0             | 3             | 0             | 0             |               |
| 0             | 0             | 0             | 0             | 0             | 0             | 0             | 0             | 0             | 0             | 6             |               |
| 0             | 0             | 0             | 0             | 0             | 0             | 0             | 0             | 0             | 1             | 1             |               |
| 0             | 0             | 0             | 0             | 0             | 0             | 0             | 0             | 1             | 0             | 1             |               |
| 0             | 0             | 0             | 0             | 0             | 0             | 0             | 0             | 0             | 0             | 0             |               |
| 0             | 0             | 0             | 0             | 0             | 0             | 0             | 0             | 0             | 0             | 0             |               |
| 0             | 0             | 0             | 0             | 2             | 0             | 0             | 0             | 0             | 0             | 0             |               |
| 23            | 0             | 0             | 0             | 0             | 28            | 0             | 0             | 0             | 0             | 0             |               |
| 0             | 0             | 0             | 0             | 1             | 5             | 0             | 0             | 0             | 0             | 0             |               |
| 0             | 0             | 0             | 0             | 0             | 0             | 0             | 0             | 0             | 0             | 0             |               |
| 2.7E+00       | 1.0E-01       | 2.2E+00       | 1.4E+00       | 6.8E-01       | 9.3E-02       | 1.6E-01       | 2.0E-01       | 3.1E-01       | 3.8E-01       | 3.8E-01       |               |
| 3.7E-01       | 3.2E-01       | 3.6E-01       | 4.4E-01       | 4.3E-01       | 1.0E-01       | 1.2E-01       | 2.9E-01       | 1.2E-01       | 1.4E-01       | 2.8E-01       |               |
| 3             | 2             | 3             | 2             | 2             | 0             | 2             | 2             | 2             | 2             | 2             |               |
| 3.9E-01       | -2.1E+00      | 5.7E-01       | -1.5E-01      | -9.4E-01      | 0.0E+00       | 3.5E-01       | -3.1E+00      | 3.5E-01       | 2.5E-01       | -5.8E-01      |               |
| 0.0E+00       |               |

| Specific_Rare |
|---------------|---------------|---------------|---------------|---------------|---------------|---------------|---------------|---------------|---------------|---------------|
| At_F0658      | At_F0671      | At_F0672      | At_F0673      | At_F0683      | At_F0698      | Atpeg0008     | Atpeg0014     | Atpeg0017     | Atpeg0018     | Atpeg0024     |
| -             | -             | -             | -             | -             | -             | NA            | NA            | NA            | NA            | NA            |
| 2.1E-03       | 5.8E-03       | 1.7E-02       | 7.6E-03       | 6.5E-03       | 8.7E-03       | 2.5E-03       | 2.6E-03       | 6.4E-03       | 1.7E-02       | 1.0E-02       |
| 3.3E-03       | 1.5E-03       | 1.8E-02       | 5.3E-03       | 6.5E-03       | 6.9E-03       | 9.3E-04       | 2.0E-03       | 2.8E-03       | 1.4E-02       | 0.0E+00       |
| 1.5E-03       | 5.6E-03       | 1.3E-02       | 4.8E-03       | 3.7E-03       | 4.0E-03       | 4.2E-03       | 2.5E-03       | 3.2E-03       | 1.6E-02       | 0.0E+00       |
| 4.0E-02       | 1.2E-01       | 1.3E-01       | 1.1E-01       | 1.0E-01       | 1.4E-01       | 6.3E-02       | 4.6E-02       | 1.0E-01       | 1.6E-01       | 6.1E-02       |
| 5.4E-02       | 4.5E-02       | 1.3E-01       | 1.0E-01       | 6.8E-02       | 1.2E-01       | 3.3E-02       | 3.6E-02       | 3.9E-02       | 1.9E-01       | 0.0E+00       |
| 3.4E-02       | 9.4E-02       | 8.6E-02       | 9.7E-02       | 7.2E-02       | 8.9E-02       | 7.3E-02       | 4.6E-02       | 4.4E-02       | 1.8E-01       | 0.0E+00       |
| 0.0E+00       | 6.5E+00       | 3.6E+00       | 3.2E+01       | 1.5E+00       | 1.4E+01       | 0.0E+00       | 0.0E+00       | 0.0E+00       | 4.3E+01       | 0.0E+00       |
| 0             | 0             | 0             | 50            | 0             | 22            | 0             | 0             | 0             | 67            | 0             |
| 0             | 1             | 0             | 6             | 0             | 2             | 0             | 0             | 0             | 7             | 0             |
| 0             | 0             | 0             | 75            | 0             | 0             | 0             | 0             | 100           | 100           | 0             |
| 0             | 0             | 0             | 14            | 14            | 0             | 0             | 0             | 0             | 17            | 0             |
| 0             | 0             | 0             | 15            | 42            | 35            | 0             | 0             | 17            | 17            | 0             |
| 0             | 36            | 0             | 22            | 0             | 64            | 0             | 0             | 0             | 38            | 0             |
| 0             | 25            | 0             | 100           | 0             | 0             | 0             | 0             | 0             | 100           | 0             |
| 0             | 0             | 0             | 100           | 7             | 100           | 0             | 0             | 0             | 50            | 0             |
| 0             | 0             | 0             | 17            | 0             | 17            | 0             | 0             | 0             | 60            | 0             |
| 0             | 0             | 0             | 17            | 0             | 0             | 0             | 0             | 0             | 20            | 0             |
| 0             | 36            | 0             | 67            | 0             | 0             | 0             | 0             | 0             | 44            | 0             |
| 0             | 25            | 38            | 100           | 0             | 0             | 0             | 0             | 0             | 78            | 0             |
| 0             | 0             | 0             | 0             | 0             | 0             | 0             | 70            | 0             | 0             | 0             |
| 0             | 0             | 0             | 18            | 0             | 0             | 0             | 56            | 0             | 67            | 0             |
| 0             | 0             | 0             | 33            | 0             | 0             | 0             | 10            | 0             | 9             | 0             |
| 0             | 0             | 0             | 0             | 0             | 63            | 0             | 0             | 0             | 20            | 0             |
| 0             | 0             | 0             | 0             | 0             | 0             | 0             | 0             | 0             | 100           | 0             |
| 0             | 0             | 0             | 33            | 0             | 0             | 0             | 0             | 0             | 50            | 0             |
| 0             | 0             | 0             | 50            | 0             | 0             | 0             | 0             | 0             | 0             | 0             |
| 0             | 0             | 0             | 15            | 9             | 0             | 0             | 0             | 8             | 25            | 0             |
| 0             | 0             | 0             | 20            | 0             | 0             | 0             | 0             | 0             | 25            | 0             |
| 0             | 0             | 0             | 50            | 0             | 0             | 0             | 0             | 0             | 60            | 0             |
| 0             | 0             | 0             | 67            | 0             | 0             | 0             | 0             | 0             | 60            | 0             |
| 0             | 0             | 0             | 20            | 0             | 0             | 0             | 0             | 0             | 33            | 0             |
| 0             | 0             | 0             | 17            | 0             | 0             | 0             | 0             | 0             | 27            | 0             |
| 0             | 0             | 0             | 25            | 0             | 0             | 0             | 0             | 0             | 57            | 0             |
| 0             | 0             | 0             | 50            | 0             | 100           | 0             | 0             | 0             | 50            | 0             |
| 0             | 0             | 0             | 0             | 0             | 0             | 0             | 0             | 0             | 0             | 0             |
| 0             | 0             | 0             | 0             | 0             | 0             | 0             | 0             | 0             | 0             | 0             |
| 0             | 0             | 0             | 20            | 0             | 0             | 0             | 0             | 0             | 0             | 0             |
| 0             | 0             | 0             | 0             | 0             | 60            | 0             | 0             | 0             | 0             | 0             |
| 25            | 0             | 17            | 0             | 0             | 0             | 0             | 0             | 0             | 50            | 0             |
| 0             | 2             | 0             | 41            | 0             | 0             | 4             | 3             | 14            | 0             | 0             |
| 0             | 0             | 0             | 2             | 4             | 0             | 0             | 0             | 0             | 0             | 0             |
| 0             | 0             | 0             | 5             | 14            | 0             | 1             | 0             | 8             | 2             | 0             |
| 0             | 0             | 2             | 1             | 0             | 0             | 0             | 0             | 0             | 2             | 0             |
| 0             | 0             | 0             | 0             | 0             | 0             | 0             | 0             | 0             | 0             | 0             |
| 0             | 0             | 0             | 29            | 0             | 0             | 0             | 0             | 0             | 7             | 0             |
| 0             | 2             | 0             | 3             | 0             | 5             | 0             | 0             | 0             | 0             | 0             |
| 0             | 0             | 0             | 0             | 0             | 0             | 0             | 0             | 0             | 0             | 0             |
| 0             | 0             | 0             | 0             | 0             | 0             | 0             | 0             | 1             | 12            | 0             |
| 0             | 0             | 0             | 0             | 0             | 0             | 0             | 0             | 0             | 4             | 0             |
| 0             | 0             | 0             | 0             | 0             | 0             | 0             | 3             | 0             | 0             | 0             |
| 0             | 0             | 0             | 0             | 0             | 0             | 0             | 0             | 0             | 0             | 0             |
| 0             | 0             | 0             | 4             | 0             | 0             | 0             | 0             | 0             | 0             | 0             |
| 0             | 0             | 0             | 10            | 0             | 9             | 0             | 0             | 0             | 0             | 0             |
| 0             | 0             | 0             | 0             | 0             | 0             | 0             | 0             | 0             | 13            | 0             |
| 2.7E-01       | 1.7E-01       | 1.1E+00       | 7.7E-01       | 7.0E-01       | 4.2E-01       | 9.9E-01       | 7.1E-01       | 1.5E-01       | 5.8E-01       | 0.0E+00       |
| 2.8E-01       | 1.9E-01       | 1.7E-01       | 4.7E-01       | 2.6E-01       | 4.8E-01       | 9.8E-02       | 2.7E-01       | 1.3E-01       | 1.1E-01       | 3.0E-01       |
| 0             | 3             | 3             | 2             | 2             | 2             | 3             | 0             | 2             | 2             | 2             |
| 0.0E+00       | 0.0E+00       | 5.5E-01       | -1.5E+00      | 6.7E-01       | 1.0E+00       | 0.0E+00       | 0.0E+00       | -2.9E-01      | -3.8E-01      | 0.0E+00       |
| 0.0E+00       |

| Specific_Rare |
|---------------|---------------|---------------|---------------|---------------|---------------|---------------|---------------|---------------|---------------|---------------|
| Atpeg0026     | Atpeg0027     | Atpeg0028     | Atpeg0031     | Atpeg0032     | Atpeg0035     | Atpeg0039     | Atpeg0044     | Atpeg0047     | Atpeg0059     | Atpeg0061     |
| NA            |
| 2.8E-03       | 0.0E+00       | 1.7E-03       | 2.5E-03       | 9.0E-03       | 2.6E-03       | 5.7E-03       | 8.4E-03       | 4.1E-03       | 5.4E-03       | 3.1E-03       |
| 2.0E-03       | 0.0E+00       | 2.3E-03       | 6.4E-03       | 1.1E-02       | 3.4E-03       | 7.7E-03       | 1.1E-02       | 3.3E-03       | 6.5E-03       | 1.7E-03       |
| 0.0E+00       | 0.0E+00       | 2.1E-03       | 7.6E-03       | 5.4E-03       | 4.7E-03       | 3.9E-03       | 1.2E-02       | 1.5E-02       | 5.1E-03       | 9.5E-03       |
| 2.9E-02       | 0.0E+00       | 4.9E-02       | 7.3E-02       | 1.0E-01       | 6.6E-02       | 5.7E-02       | 1.7E-01       | 7.7E-02       | 1.2E-01       | 4.0E-02       |
| 3.0E-02       | 0.0E+00       | 2.8E-02       | 1.4E-01       | 1.9E-01       | 4.1E-02       | 1.1E-01       | 1.6E-01       | 1.2E-01       | 1.1E-01       | 4.6E-02       |
| 0.0E+00       | 0.0E+00       | 4.5E-02       | 1.6E-01       | 1.1E-01       | 3.8E-02       | 8.4E-02       | 1.6E-01       | 2.6E-01       | 1.1E-01       | 1.1E-01       |
| 0.0E+00       | 0.0E+00       | 0.0E+00       | 2.0E+01       | 5.0E+01       | 1.0E+00       | 0.0E+00       | 4.3E+01       | 0.0E+00       | 5.0E+01       | 5.7E+00       |
| 11            | 0             | 0             | 100           | 100           | 0             | 0             | 53            | 0             | 67            | 0             |
| 2             | 0             | 0             | 38            | 78            | 0             | 0             | 6             | 0             | 2             | 0             |
| 0             | 0             | 0             | 0             | 0             | 33            | 0             | 0             | 0             | 0             | 20            |
| 0             | 0             | 0             | 0             | 0             | 0             | 0             | 0             | 0             | 0             | 0             |
| 0             | 0             | 0             | 0             | 0             | 0             | 0             | 18            | 0             | 11            | 0             |
| 0             | 0             | 0             | 0             | 29            | 17            | 0             | 0             | 0             | 75            | 7             |
| 0             | 0             | 0             | 63            | 100           | 0             | 0             | 100           | 0             | 0             | 0             |
| 0             | 0             | 0             | 0             | 100           | 0             | 0             | 100           | 0             | 0             | 0             |
| 0             | 0             | 0             | 0             | 0             | 0             | 0             | 17            | 0             | 67            | 0             |
| 0             | 0             | 0             | 50            | 50            | 4             | 0             | 33            | 0             | 43            | 0             |
| 0             | 0             | 0             | 0             | 0             | 0             | 0             | 57            | 0             | 75            | 30            |
| 0             | 0             | 0             | 100           | 100           | 0             | 0             | 67            | 0             | 100           | 20            |
| 0             | 0             | 0             | 0             | 0             | 0             | 25            | 88            | 0             | 100           | 0             |
| 0             | 0             | 0             | 20            | 0             | 0             | 0             | 50            | 0             | 0             | 33            |
| 0             | 0             | 0             | 43            | 0             | 0             | 0             | 11            | 0             | 0             | 11            |
| 0             | 0             | 8             | 67            | 0             | 0             | 0             | 38            | 0             | 0             | 14            |
| 0             | 0             | 40            | 100           | 0             | 0             | 0             | 0             | 0             | 0             | 33            |
| 0             | 0             | 0             | 0             | 0             | 0             | 0             | 0             | 0             | 0             | 0             |
| 0             | 0             | 0             | 0             | 0             | 0             | 0             | 0             | 0             | 0             | 0             |
| 0             | 0             | 0             | 0             | 0             | 0             | 0             | 54            | 0             | 14            | 0             |
| 0             | 0             | 0             | 0             | 0             | 0             | 0             | 0             | 0             | 0             | 0             |
| 0             | 0             | 0             | 100           | 100           | 0             | 0             | 100           | 0             | 0             | 0             |
| 0             | 0             | 0             | 0             | 100           | 0             | 0             | 100           | 0             | 0             | 0             |
| 0             | 0             | 0             | 0             | 50            | 0             | 0             | 20            | 0             | 0             | 0             |
| 0             | 0             | 0             | 0             | 50            | 0             | 0             | 0             | 0             | 30            | 0             |
| 50            | 0             | 0             | 100           | 50            | 0             | 0             | 0             | 0             | 43            | 0             |
| 0             | 0             | 0             | 0             | 100           | 0             | 0             | 80            | 0             | 50            | 0             |
| 0             | 0             | 0             | 0             | 0             | 0             | 0             | 22            | 0             | 100           | 0             |
| 0             | 0             | 0             | 33            | 0             | 0             | 0             | 8             | 0             | 0             | 50            |
| 0             | 0             | 0             | 0             | 0             | 0             | 0             | 53            | 10            | 0             | 0             |
| 0             | 0             | 0             | 50            | 0             | 0             | 0             | 50            | 0             | 0             | 100           |
| 0             | 0             | 0             | 0             | 0             | 0             | 0             | 0             | 0             | 0             | 0             |
| 0             | 0             | 0             | 0             | 0             | 0             | 0             | 0             | 0             | 0             | 0             |
| 0             | 0             | 0             | 0             | 0             | 0             | 0             | 10            | 0             | 0             | 0             |
| 0             | 0             | 0             | 0             | 0             | 0             | 0             | 12            | 0             | 0             | 0             |
| 0             | 0             | 0             | 46            | 40            | 0             | 0             | 28            | 3             | 0             | 0             |
| 0             | 0             | 0             | 0             | 100           | 0             | 0             | 13            | 0             | 0             | 0             |
| 0             | 0             | 0             | 0             | 22            | 0             | 0             | 7             | 0             | 0             | 0             |
| 0             | 0             | 0             | 14            | 47            | 0             | 0             | 2             | 0             | 0             | 0             |
| 4             | 0             | 0             | 100           | 38            | 0             | 0             | 0             | 0             | 5             | 0             |
| 0             | 0             | 0             | 0             | 0             | 0             | 0             | 0             | 0             | 0             | 0             |
| 0             | 0             | 0             | 0             | 0             | 0             | 0             | 3             | 0             | 16            | 70            |
| 0             | 0             | 0             | 0             | 2             | 0             | 0             | 3             | 0             | 0             | 11            |
| 0             | 0             | 0             | 0             | 0             | 0             | 0             | 13            | 0             | 0             | 4             |
| 0             | 0             | 0             | 0             | 0             | 0             | 0             | 0             | 0             | 0             | 0             |
| 0             | 0             | 0             | 8             | 0             | 0             | 0             | 0             | 2             | 0             | 4             |
| 7.0E-01       | 0.0E+00       | 9.1E-01       | 1.0E+00       | 2.8E-01       | 3.5E-01       | 2.6E-01       | 1.2E+00       | 2.8E-01       | 3.9E-01       | 5.4E-01       |
| 2.8E-01       | 3.0E-01       | 6.1E-01       | 3.0E+00       | 8.0E-02       | 1.3E-01       | 2.9E-01       | 3.4E-01       | 5.1E-02       | 5.3E-01       | 5.4E-01       |
| 2             | 2             | 2             | 0             | 0             | 0             | 0             | 0             | 0             | 2             | 2             |
| -8.0E-01      | 0.0E+00       | -9.8E+00      | -1.4E-01      |
| 0.0E+00       |

| Specific_Rare |
|---------------|---------------|---------------|---------------|---------------|---------------|---------------|---------------|---------------|---------------|---------------|
| Atpeg0067     | Atpeg0075     | Atpeg0093     | Atpeg0094     | Atpeg0096     | Atpeg0101     | Atpeg0104     | Atpeg0109     | Atpeg0111     | Atpeg0113     | Atpeg0118     |
| NA            |
| 2.5E-03       | 1.2E-02       | 1.7E-02       | 8.7E-03       | 1.7E-03       | 9.0E-03       | 6.0E-03       | 2.7E-03       | 4.2E-03       | 2.1E-03       | 5.4E-03       |
| 4.5E-04       | 7.5E-03       | 5.0E-03       | 4.6E-03       | 1.5E-03       | 1.0E-02       | 3.7E-03       | 7.0E-03       | 5.8E-03       | 3.1E-03       | 1.6E-02       |
| 3.2E-03       | 1.4E-02       | 7.5E-03       | 5.5E-03       | 3.0E-03       | 3.7E-03       | 3.6E-03       | 9.2E-03       | 2.7E-03       | 2.4E-03       | 1.9E-02       |
| 3.9E-02       | 7.8E-02       | 2.2E-01       | 1.7E-01       | 2.9E-02       | 7.6E-02       | 6.5E-02       | 6.1E-02       | 5.7E-02       | 3.4E-02       | 3.5E-02       |
| 1.7E-02       | 6.6E-02       | 9.1E-02       | 9.3E-02       | 5.0E-02       | 5.6E-02       | 5.1E-02       | 1.5E-01       | 5.3E-02       | 2.9E-02       | 5.7E-02       |
| 5.2E-02       | 1.1E-01       | 9.5E-02       | 9.6E-02       | 8.4E-02       | 6.4E-02       | 3.2E-02       | 1.0E-01       | 3.7E-02       | 4.5E-02       | 1.0E-01       |
| 0.0E+00       | 0.0E+00       | 1.8E+01       | 0.0E+00       | 4.0E+01       | 0.0E+00       | 2.3E+00       | 4.1E+01       | 0.0E+00       | 0.0E+00       | 0.0E+00       |
| 0             | 0             | 36            | 0             | 0             | 0             | 0             | 56            | 0             | 0             | 0             |
| 0             | 0             | 2             | 0             | 0             | 1             | 0             | 3             | 0             | 0             | 0             |
| 0             | 0             | 46            | 0             | 0             | 0             | 0             | 0             | 0             | 33            | 0             |
| 0             | 0             | 50            | 0             | 25            | 0             | 0             | 0             | 0             | 0             | 0             |
| 0             | 0             | 0             | 0             | 30            | 0             | 0             | 0             | 0             | 0             | 0             |
| 0             | 17            | 62            | 0             | 29            | 0             | 0             | 0             | 0             | 0             | 0             |
| 0             | 0             | 0             | 0             | 33            | 0             | 0             | 82            | 0             | 0             | 0             |
| 0             | 0             | 32            | 0             | 0             | 0             | 0             | 0             | 0             | 0             | 0             |
| 0             | 0             | 0             | 0             | 100           | 0             | 9             | 43            | 0             | 0             | 0             |
| 0             | 0             | 0             | 0             | 0             | 0             | 0             | 57            | 0             | 0             | 0             |
| 0             | 0             | 23            | 0             | 50            | 0             | 0             | 33            | 0             | 0             | 0             |
| 0             | 0             | 100           | 0             | 100           | 0             | 0             | 50            | 0             | 0             | 0             |
| 0             | 0             | 100           | 0             | 33            | 0             | 0             | 67            | 0             | 0             | 0             |
| 0             | 0             | 60            | 0             | 14            | 0             | 0             | 0             | 0             | 0             | 0             |
| 0             | 0             | 0             | 0             | 0             | 0             | 0             | 0             | 0             | 0             | 0             |
| 0             | 0             | 0             | 0             | 0             | 0             | 0             | 0             | 0             | 0             | 0             |
| 0             | 0             | 14            | 0             | 0             | 0             | 0             | 0             | 33            | 0             | 0             |
| 0             | 0             | 0             | 0             | 0             | 0             | 0             | 0             | 0             | 0             | 0             |
| 0             | 0             | 0             | 0             | 0             | 0             | 0             | 0             | 0             | 0             | 0             |
| 0             | 0             | 0             | 0             | 0             | 0             | 0             | 0             | 0             | 0             | 0             |
| 0             | 0             | 0             | 0             | 0             | 0             | 0             | 0             | 0             | 0             | 0             |
| 0             | 0             | 29            | 0             | 0             | 0             | 0             | 0             | 0             | 0             | 0             |
| 0             | 0             | 0             | 0             | 0             | 0             | 0             | 63            | 0             | 0             | 0             |
| 0             | 0             | 6             | 0             | 0             | 0             | 0             | 0             | 0             | 0             | 0             |
| 0             | 0             | 0             | 0             | 0             | 0             | 0             | 25            | 0             | 0             | 0             |
| 0             | 0             | 0             | 0             | 0             | 0             | 0             | 17            | 0             | 0             | 0             |
| 0             | 0             | 6             | 0             | 0             | 0             | 0             | 60            | 0             | 0             | 0             |
| 0             | 0             | 75            | 0             | 0             | 0             | 0             | 0             | 0             | 0             | 0             |
| 0             | 0             | 100           | 0             | 33            | 0             | 0             | 100           | 0             | 0             | 0             |
| 0             | 0             | 50            | 0             | 0             | 0             | 0             | 9             | 0             | 0             | 0             |
| 0             | 0             | 10            | 0             | 0             | 0             | 0             | 0             | 0             | 0             | 0             |
| 0             | 13            | 0             | 0             | 0             | 0             | 0             | 0             | 0             | 0             | 0             |
| 0             | 0             | 0             | 0             | 0             | 0             | 0             | 0             | 0             | 0             | 0             |
| 0             | 0             | 0             | 0             | 0             | 0             | 0             | 0             | 0             | 0             | 0             |
| 0             | 0             | 0             | 0             | 0             | 0             | 0             | 0             | 0             | 0             | 0             |
| 0             | 0             | 0             | 0             | 0             | 0             | 0             | 0             | 0             | 0             | 0             |
| 0             | 0             | 0             | 0             | 0             | 0             | 0             | 0             | 0             | 0             | 0             |
| 0             | 0             | 0             | 0             | 0             | 0             | 0             | 0             | 0             | 0             | 0             |
| 0             | 0             | 0             | 0             | 0             | 0             | 0             | 0             | 0             | 0             | 0             |
| 0             | 0             | 0             | 0             | 0             | 0             | 0             | 0             | 0             | 0             | 0             |
| 0             | 0             | 0             | 0             | 0             | 0             | 0             | 0             | 0             | 0             | 0             |
| 0             | 0             | 1             | 0             | 0             | 3             | 0             | 0             | 0             | 0             | 0             |
| 0             | 0             | 0             | 0             | 0             | 0             | 0             | 0             | 0             | 0             | 0             |
| 0             | 0             | 0             | 0             | 0             | 0             | 0             | 0             | 0             | 0             | 0             |
| 0             | 0             | 1             | 0             | 0             | 0             | 0             | 7             | 0             | 0             | 0             |
| 0             | 0             | 5             | 0             | 0             | 3             | 0             | 0             | 0             | 0             | 0             |
| 0             | 0             | 0             | 0             | 0             | 0             | 3             | 64            | 0             | 0             | 0             |
| 0             | 0             | 10            | 0             | 0             | 2             | 0             | 13            | 0             | 0             | 0             |
| 0             | 0             | 8             | 0             | 0             | 0             | 0             | 0             | 0             | 0             | 0             |
| 0             | 0             | 0             | 0             | 0             | 0             | 0             | 0             | 0             | 0             | 0             |
| 6             | 0             | 0             | 0             | 0             | 0             | 0             | 0             | 0             | 0             | 0             |
| 9.9E-01       | 1.3E-01       | 6.4E-01       | 4.5E-01       | 5.7E-01       | 2.2E+00       | 1.7E-01       | 3.1E-01       | 2.0E+00       | 9.9E-01       | 6.8E-02       |
| 5.1E-01       | 1.3E-01       | 1.2E-01       | 3.1E-01       | 4.3E-01       | 3.9E-01       | 4.3E-02       | 1.5E-01       | 5.2E-02       | 2.5E-01       | 3.0E-01       |
| 0             | 4             | 0             | 2             | 0             | 0             | 0             | 0             | 0             | 0             | 2             |
| 0.0E+00       | 1.8E-01       | 0.0E+00       | -7.5E-01      | 0.0E+00       | 0.0E+00       | 0.0E+00       | 0.0E+00       | 0.0E+00       | 0.0E+00       | -3.0E+00      |
| 0.0E+00       |

| Specific_Rare |
|---------------|---------------|---------------|---------------|---------------|---------------|---------------|---------------|---------------|---------------|---------------|
| Atpeg0119     | Atpeg0126     | Atpeg0129     | Atpeg0139     | Atpeg0149     | Atpeg0152     | Atpeg0153     | Atpeg0154     | Atpeg0156     | Atpeg0168     | Atpeg0171     |
| NA            |
| 7.0E-03       | 4.7E-03       | 5.3E-03       | 6.9E-03       | 2.2E-03       | 3.8E-03       | 4.0E-03       | 7.0E-03       | 2.3E-03       | 1.2E-02       | 2.5E-03       |
| 9.6E-03       | 2.4E-03       | 7.4E-03       | 7.9E-03       | 2.2E-03       | 7.1E-04       | 7.4E-04       | 6.1E-03       | 8.9E-03       | 1.0E-02       | 5.7E-04       |
| 1.2E-02       | 1.2E-03       | 3.2E-03       | 1.5E-02       | 2.4E-03       | 2.8E-03       | 6.0E-03       | 5.1E-03       | 8.2E-03       | 6.7E-03       | 5.9E-03       |
| 8.4E-02       | 4.3E-02       | 6.6E-02       | 6.8E-02       | 5.0E-02       | 8.1E-02       | 4.4E-02       | 9.8E-02       | 4.8E-02       | 9.4E-02       | 4.7E-02       |
| 8.0E-02       | 3.3E-02       | 6.4E-02       | 9.2E-02       | 7.3E-02       | 5.1E-02       | 1.9E-02       | 4.4E-02       | 2.2E-01       | 1.1E-01       | 3.7E-02       |
| 1.5E-01       | 3.1E-02       | 3.8E-02       | 1.7E-01       | 6.4E-02       | 7.5E-02       | 6.3E-02       | 5.0E-02       | 1.3E-01       | 5.8E-02       | 7.0E-02       |
| 1.1E+01       | 1.3E+01       | 0.0E+00       | 8.3E+00       | 0.0E+00       | 0.0E+00       | 1.7E+01       | 0.0E+00       | 5.0E+01       | 0.0E+00       | 0.0E+00       |
| 0             | 0             | 0             | 0             | 0             | 0             | 0             | 0             | 25            | 0             | 0             |
| 1             | 0             | 1             | 0             | 0             | 0             | 0             | 0             | 0             | 0             | 0             |
| 100           | 0             | 0             | 0             | 0             | 0             | 0             | 0             | 0             | 0             | 0             |
| 0             | 0             | 0             | 0             | 0             | 0             | 0             | 0             | 0             | 0             | 0             |
| 0             | 0             | 0             | 0             | 0             | 0             | 0             | 10            | 0             | 0             | 0             |
| 0             | 0             | 0             | 0             | 0             | 0             | 0             | 0             | 0             | 0             | 0             |
| 0             | 25            | 0             | 0             | 0             | 0             | 25            | 0             | 86            | 0             | 0             |
| 0             | 0             | 0             | 0             | 0             | 0             | 0             | 0             | 0             | 0             | 0             |
| 0             | 0             | 0             | 0             | 0             | 0             | 0             | 0             | 67            | 0             | 0             |
| 5             | 29            | 0             | 0             | 0             | 0             | 100           | 0             | 0             | 0             | 0             |
| 30            | 0             | 0             | 5             | 0             | 0             | 0             | 0             | 50            | 0             | 0             |
| 60            | 0             | 0             | 40            | 0             | 0             | 0             | 0             | 100           | 0             | 0             |
| 100           | 0             | 0             | 0             | 0             | 0             | 0             | 0             | 100           | 17            | 0             |
| 42            | 0             | 0             | 0             | 0             | 0             | 0             | 0             | 67            | 22            | 0             |
| 43            | 0             | 7             | 6             | 0             | 0             | 0             | 0             | 0             | 0             | 0             |
| 67            | 8             | 17            | 47            | 0             | 0             | 0             | 0             | 0             | 0             | 0             |
| 0             | 63            | 60            | 88            | 0             | 100           | 0             | 0             | 100           | 0             | 0             |
| 0             | 0             | 0             | 0             | 0             | 0             | 0             | 0             | 0             | 0             | 0             |
| 8             | 0             | 0             | 0             | 0             | 0             | 0             | 0             | 0             | 0             | 0             |
| 0             | 0             | 0             | 0             | 0             | 0             | 0             | 0             | 0             | 0             | 0             |
| 0             | 0             | 0             | 0             | 0             | 0             | 0             | 0             | 0             | 0             | 0             |
| 0             | 0             | 0             | 0             | 0             | 0             | 0             | 0             | 11            | 0             | 0             |
| 0             | 0             | 0             | 0             | 0             | 0             | 0             | 0             | 0             | 0             | 0             |
| 0             | 0             | 0             | 0             | 0             | 0             | 0             | 0             | 0             | 0             | 0             |
| 0             | 0             | 0             | 0             | 0             | 0             | 0             | 0             | 0             | 0             | 0             |
| 0             | 0             | 0             | 0             | 0             | 0             | 0             | 0             | 0             | 0             | 0             |
| 0             | 0             | 0             | 0             | 0             | 0             | 0             | 0             | 100           | 0             | 0             |
| 0             | 0             | 0             | 0             | 0             | 0             | 0             | 0             | 33            | 0             | 0             |
| 22            | 0             | 0             | 0             | 0             | 0             | 0             | 0             | 33            | 11            | 0             |
| 17            | 0             | 0             | 7             | 0             | 0             | 0             | 0             | 0             | 0             | 0             |
| 0             | 0             | 0             | 27            | 0             | 0             | 0             | 0             | 20            | 0             | 0             |
| 0             | 0             | 0             | 0             | 0             | 0             | 0             | 0             | 100           | 0             | 0             |
| 3             | 4             | 0             | 0             | 0             | 0             | 0             | 0             | 0             | 0             | 0             |
| 0             | 0             | 0             | 0             | 0             | 0             | 0             | 3             | 0             | 0             | 0             |
| 0             | 0             | 1             | 0             | 0             | 0             | 0             | 6             | 0             | 0             | 0             |
| 0             | 0             | 0             | 0             | 0             | 0             | 0             | 0             | 0             | 0             | 0             |
| 0             | 0             | 0             | 0             | 0             | 0             | 0             | 0             | 0             | 0             | 0             |
| 0             | 0             | 0             | 0             | 0             | 0             | 0             | 0             | 0             | 0             | 0             |
| 0             | 0             | 0             | 0             | 0             | 0             | 0             | 0             | 0             | 0             | 0             |
| 0             | 0             | 0             | 0             | 0             | 0             | 0             | 0             | 0             | 0             | 0             |
| 0             | 0             | 2             | 0             | 0             | 0             | 0             | 0             | 0             | 0             | 0             |
| 3             | 0             | 0             | 0             | 0             | 0             | 0             | 0             | 0             | 0             | 0             |
| 0             | 0             | 0             | 0             | 0             | 0             | 0             | 0             | 4             | 0             | 0             |
| 5             | 0             | 0             | 0             | 0             | 0             | 0             | 0             | 14            | 0             | 0             |
| 1             | 0             | 0             | 0             | 0             | 0             | 0             | 0             | 0             | 0             | 0             |
| 0             | 0             | 1             | 0             | 0             | 0             | 0             | 0             | 20            | 0             | 0             |
| 0             | 0             | 0             | 0             | 0             | 0             | 0             | 0             | 21            | 0             | 0             |
| 1.6E-01       | 9.5E-01       | 1.8E-01       | 9.2E-02       | 4.1E-01       | 1.0E+00       | 4.6E-01       | 8.8E-02       | 1.8E-01       | 1.7E+00       | 1.0E+00       |
| 2.3E-01       | 2.9E-01       | 3.4E-01       | 1.8E-01       | 2.6E-01       | 1.5E-01       | 5.2E-01       | 7.0E-01       | 9.2E-02       | 5.5E-01       | 4.7E-01       |
| 4             | 0             | 2             | 2             | 0             | 0             | 0             | 0             | 0             | 0             | 0             |
| 0.0E+00       | 0.0E+00       | -3.4E-01      | 0.0E+00       |
| 0.0E+00       |





| Pseudo_High | Pseudo_Low |
|-------------|------------|------------|------------|------------|------------|------------|------------|------------|------------|------------|------------|
| At_F0693    | At_F0465   | At_F0368   | At_F0322   | At_F0203   | At_F0690   | At_F0527   | At_F0605   | At_F0625   | At_F0654   | At_F0701   | At_F0291   |
| -           | -          | -          | -          | bm         | -          | -          | -          | -          | -          | -          | -          |
| 1.6E-03     | 9.3E-03    | 8.1E-03    | 1.2E-02    | 1.1E-02    | 8.1E-03    | 9.3E-03    | 2.4E-03    | 1.6E-03    | 7.3E-03    | 7.2E-03    | 2.5E-03    |
| 1.8E-03     | 6.4E-03    | 3.8E-03    | 1.4E-02    | 3.1E-03    | 7.3E-03    | 5.0E-03    | 2.1E-03    | 5.0E-03    | 4.3E-03    | 6.5E-03    | 2.9E-03    |
| 4.6E-03     | 4.0E-03    | 4.4E-03    | 8.4E-03    | 1.2E-03    | 7.8E-03    | 8.6E-03    | 2.0E-03    | 5.2E-03    | 6.2E-03    | 6.1E-03    | 5.0E-03    |
| 4.3E-02     | 1.0E-01    | 1.2E-01    | 1.4E-01    | 6.9E-02    | 1.1E-01    | 7.7E-02    | 5.6E-02    | 1.1E-01    | 5.6E-02    | 9.6E-02    | 4.2E-02    |
| 3.4E-02     | 5.1E-02    | 6.4E-02    | 8.6E-02    | 6.9E-02    | 9.2E-02    | 9.1E-02    | 4.5E-02    | 8.1E-02    | 3.8E-02    | 7.9E-02    | 4.1E-02    |
| 5.5E-02     | 5.1E-02    | 6.8E-02    | 1.2E-01    | 4.2E-02    | 1.3E-01    | 6.4E-02    | 6.6E-02    | 8.5E-02    | 1.0E-01    | 5.7E-02    | 5.5E-02    |
| 1.3E+00     | 0.0E+00    | 5.7E+00    | 2.0E+00    | 2.3E+01    | 5.0E+01    | 0.0E+00    | 0.0E+00    | 0.0E+00    | 0.0E+00    | 3.2E+00    | 0.0E+00    |
| 0           | 0          | 0          | 0          | 0          | 77         | 0          | 0          | 0          | 0          | 8          | 0          |
| 0           | 0          | 0          | 0          | 0          | 13         | 0          | 0          | 1          | 0          | 4          | 0          |
| 0           | 0          | 0          | 0          | 80         | 0          | 0          | 0          | 100        | 0          | 0          | 0          |
| 0           | 0          | 50         | 43         | 0          | 0          | 0          | 0          | 47         | 0          | 0          | 31         |
| 0           | 0          | 38         | 0          | 40         | 0          | 0          | 0          | 23         | 0          | 0          | 0          |
| 0           | 0          | 0          | 8          | 67         | 60         | 0          | 0          | 53         | 0          | 0          | 0          |
| 0           | 0          | 0          | 0          | 0          | 100        | 0          | 0          | 17         | 0          | 0          | 0          |
| 0           | 0          | 8          | 14         | 89         | 100        | 0          | 0          | 0          | 0          | 0          | 0          |
| 10          | 0          | 16         | 0          | 0          | 50         | 0          | 0          | 0          | 0          | 0          | 0          |
| 0           | 0          | 4          | 0          | 6          | 44         | 0          | 0          | 0          | 0          | 20         | 0          |
| 0           | 0          | 0          | 0          | 25         | 56         | 0          | 0          | 0          | 0          | 5          | 0          |
| 0           | 0          | 0          | 0          | 0          | 100        | 0          | 0          | 0          | 0          | 0          | 0          |
| 0           | 0          | 0          | 0          | 0          | 100        | 0          | 0          | 0          | 0          | 0          | 0          |
| 0           | 0          | 0          | 0          | 0          | 0          | 0          | 0          | 0          | 0          | 0          | 0          |
| 0           | 0          | 0          | 0          | 0          | 10         | 0          | 0          | 0          | 0          | 0          | 0          |
| 0           | 0          | 0          | 0          | 27         | 13         | 0          | 0          | 0          | 11         | 0          | 0          |
| 0           | 0          | 0          | 0          | 100        | 83         | 0          | 0          | 50         | 67         | 0          | 0          |
| 0           | 0          | 0          | 50         | 0          | 0          | 0          | 0          | 100        | 0          | 0          | 0          |
| 0           | 0          | 33         | 18         | 0          | 0          | 0          | 0          | 25         | 0          | 0          | 0          |
| 0           | 0          | 0          | 0          | 0          | 11         | 0          | 0          | 36         | 0          | 0          | 5          |
| 0           | 0          | 0          | 0          | 0          | 13         | 0          | 0          | 0          | 0          | 0          | 0          |
| 0           | 0          | 0          | 0          | 0          | 57         | 0          | 0          | 0          | 0          | 0          | 0          |
| 0           | 0          | 0          | 0          | 0          | 88         | 0          | 0          | 0          | 0          | 0          | 0          |
| 0           | 0          | 0          | 0          | 0          | 56         | 0          | 0          | 0          | 0          | 0          | 0          |
| 0           | 0          | 0          | 0          | 0          | 13         | 0          | 0          | 0          | 0          | 33         | 0          |
| 0           | 0          | 0          | 0          | 0          | 31         | 0          | 0          | 0          | 0          | 0          | 0          |
| 0           | 0          | 0          | 0          | 0          | 75         | 0          | 0          | 0          | 0          | 0          | 0          |
| 0           | 0          | 0          | 0          | 0          | 50         | 0          | 0          | 0          | 0          | 0          | 0          |
| 0           | 0          | 0          | 0          | 0          | 25         | 0          | 0          | 0          | 0          | 0          | 0          |
| 0           | 0          | 0          | 0          | 0          | 7          | 0          | 0          | 0          | 0          | 0          | 0          |
| 0           | 0          | 0          | 0          | 0          | 45         | 0          | 0          | 0          | 25         | 0          | 0          |
| 0           | 0          | 0          | 0          | 0          | 60         | 0          | 0          | 0          | 50         | 0          | 0          |
| 0           | 0          | 0          | 0          | 0          | 0          | 3          | 0          | 10         | 0          | 0          | 0          |
| 0           | 0          | 9          | 22         | 0          | 0          | 0          | 0          | 9          | 0          | 0          | 0          |
| 0           | 0          | 0          | 0          | 0          | 0          | 0          | 1          | 3          | 0          | 0          | 0          |
| 0           | 0          | 0          | 0          | 0          | 0          | 0          | 0          | 4          | 0          | 0          | 0          |
| 0           | 0          | 0          | 3          | 0          | 36         | 0          | 0          | 0          | 0          | 0          | 0          |
| 2           | 0          | 0          | 0          | 0          | 13         | 0          | 0          | 0          | 0          | 0          | 0          |
| 0           | 0          | 0          | 1          | 0          | 12         | 0          | 0          | 0          | 0          | 0          | 0          |
| 0           | 0          | 0          | 0          | 0          | 4          | 0          | 0          | 0          | 0          | 17         | 0          |
| 0           | 0          | 0          | 0          | 0          | 6          | 0          | 0          | 2          | 0          | 0          | 0          |
| 0           | 0          | 0          | 0          | 0          | 13         | 0          | 0          | 0          | 0          | 0          | 0          |
| 0           | 0          | 0          | 0          | 0          | 24         | 0          | 0          | 0          | 0          | 0          | 0          |
| 0           | 0          | 2          | 0          | 0          | 6          | 0          | 0          | 0          | 0          | 0          | 0          |
| 0           | 0          | 0          | 0          | 0          | 2          | 2          | 0          | 0          | 0          | 0          | 0          |
| 0           | 0          | 0          | 20         | 1          | 2          | 0          | 0          | 0          | 12         | 0          | 0          |
| 0           | 0          | 0          | 0          | 0          | 9          | 0          | 0          | 0          | 5          | 0          | 0          |
| 8.0E-02     | 1.9E-01    | 8.1E-02    | 9.3E-01    | 6.9E-02    | 8.4E-02    | 8.8E-01    | 2.0E-01    | 1.9E-01    | 1.8E+00    | 6.0E-01    | 7.4E-02    |
| 6.4E-01     | 2.3E-01    | 1.9E-01    | 4.6E-01    | 2.2E-01    | 1.2E-01    | 3.8E-01    | 3.7E-01    | 3.3E-01    | 2.5E-01    | 4.6E-01    | 1.1E-01    |
| 2           | 0          | 2          | 2          | 2          | 2          | 2          | 0          | 0          | 0          | 2          | 0          |
| 1.7E-01     | 0.0E+00    | 4.8E-01    | 4.0E-02    | 6.9E-01    | -1.1E+00   | -8.7E-01   | 0.0E+00    | 0.0E+00    | 0.0E+00    | -2.4E+00   | 0.0E+00    |
| 0.0E+00     | 1.6E+01    | 2.9E+00    | 1.4E+01    | 1.3E+01    | 5.0E+00    | 4.7E+01    | 5.9E+00    | 9.8E+00    | 1.6E+01    | 1.1E+01    | 0.0E+00    |

| Pseudo_Low |
|------------|------------|------------|------------|------------|------------|------------|------------|------------|------------|------------|------------|
| At_F0352   | At_F0689   | Atesg0095  | Atesg0146  | Atpsg0022  | Atpsg0041  | Atpsg0081  | At_F0479   | Atpsg0066  | Atpsg0116  | At_F0333   | At_F0525   |
| -          | -          | NA         | NA         | NA         | NA         | NA         | -          | NA         | NA         | -          | -          |
| 3.0E-03    | 8.5E-03    | 8.2E-03    | 3.2E-03    | 1.6E-02    | 1.2E-02    | 1.6E-03    | 8.6E-03    | 5.9E-03    | 1.3E-02    | 3.1E-03    | 2.6E-03    |
| 3.9E-03    | 3.2E-03    | 6.1E-03    | 5.2E-03    | 7.3E-03    | 9.4E-03    | 2.7E-03    | 4.8E-03    | 7.8E-03    | 2.8E-02    | 5.2E-03    | 1.4E-03    |
| 4.9E-03    | 2.4E-03    | 3.1E-03    | 6.7E-03    | 6.8E-03    | 8.1E-03    | 2.3E-03    | 3.4E-03    | 9.0E-03    | 3.0E-02    | 3.4E-03    | 3.1E-03    |
| 4.6E-02    | 6.1E-02    | 1.3E-01    | 6.0E-02    | 1.9E-01    | 1.4E-01    | 4.0E-02    | 1.3E-01    | 7.9E-02    | 1.6E-01    | 9.7E-02    | 2.6E-02    |
| 3.9E-02    | 4.4E-02    | 1.1E-01    | 6.9E-02    | 9.3E-02    | 1.0E-01    | 4.3E-02    | 7.7E-02    | 6.7E-02    | 2.0E-01    | 8.9E-02    | 2.2E-02    |
| 5.1E-02    | 4.5E-02    | 6.7E-02    | 4.6E-02    | 1.1E-01    | 1.1E-01    | 4.6E-02    | 8.6E-02    | 5.9E-02    | 2.0E-01    | 4.7E-02    | 3.8E-02    |
| 4.0E+00    | 0.0E+00    | 2.3E+01    | 2.0E+01    | 0.0E+00    | 0.0E+00    | 0.0E+00    | 0.0E+00    | 7.6E+00    | 2.7E+01    | 3.9E+00    | 0.0E+00    |
| 0          | 0          | 0          | 0          | 0          | 0          | 0          | 0          | 0          | 3          | 0          | 0          |
| 0          | 1          | 1          | 0          | 0          | 0          | 2          | 0          | 0          | 0          | 0          | 0          |
| 0          | 0          | 100        | 0          | 88         | 0          | 0          | 100        | 0          | 0          | 0          | 0          |
| 0          | 0          | 0          | 0          | 0          | 0          | 0          | 0          | 0          | 0          | 0          | 0          |
| 0          | 0          | 16         | 0          | 38         | 0          | 0          | 0          | 0          | 0          | 0          | 0          |
| 0          | 0          | 0          | 0          | 0          | 0          | 0          | 0          | 25         | 0          | 0          | 13         |
| 0          | 0          | 0          | 0          | 0          | 0          | 0          | 0          | 0          | 100        | 0          | 0          |
| 0          | 0          | 0          | 0          | 0          | 0          | 0          | 0          | 0          | 0          | 0          | 0          |
| 0          | 0          | 0          | 23         | 0          | 0          | 0          | 0          | 13         | 0          | 0          | 0          |
| 0          | 0          | 25         | 29         | 0          | 0          | 0          | 0          | 0          | 26         | 0          | 0          |
| 22         | 0          | 25         | 25         | 0          | 0          | 0          | 0          | 22         | 50         | 5          | 0          |
| 0          | 0          | 78         | 0          | 0          | 0          | 0          | 0          | 40         | 67         | 11         | 0          |
| 0          | 0          | 0          | 0          | 100        | 50         | 0          | 0          | 0          | 0          | 0          | 0          |
| 0          | 0          | 0          | 0          | 40         | 44         | 0          | 0          | 0          | 0          | 0          | 0          |
| 0          | 0          | 0          | 0          | 35         | 8          | 0          | 0          | 0          | 7          | 0          | 0          |
| 0          | 0          | 0          | 0          | 36         | 22         | 0          | 0          | 14         | 0          | 9          | 0          |
| 0          | 0          | 0          | 0          | 67         | 0          | 0          | 0          | 50         | 0          | 57         | 50         |
| 0          | 0          | 0          | 0          | 0          | 0          | 0          | 100        | 0          | 0          | 0          | 0          |
| 0          | 0          | 0          | 0          | 0          | 0          | 0          | 0          | 0          | 0          | 0          | 0          |
| 0          | 0          | 0          | 0          | 20         | 0          | 0          | 0          | 0          | 0          | 0          | 0          |
| 0          | 0          | 0          | 0          | 0          | 0          | 0          | 0          | 0          | 0          | 0          | 0          |
| 0          | 0          | 0          | 0          | 0          | 0          | 0          | 0          | 0          | 0          | 0          | 0          |
| 0          | 0          | 0          | 0          | 0          | 0          | 0          | 0          | 0          | 0          | 0          | 0          |
| 0          | 0          | 0          | 0          | 0          | 0          | 0          | 0          | 0          | 0          | 0          | 0          |
| 0          | 0          | 0          | 0          | 0          | 0          | 0          | 0          | 0          | 8          | 0          | 0          |
| 0          | 0          | 0          | 0          | 0          | 0          | 0          | 0          | 0          | 0          | 0          | 0          |
| 0          | 0          | 0          | 0          | 25         | 0          | 0          | 0          | 0          | 0          | 0          | 0          |
| 0          | 0          | 0          | 0          | 38         | 0          | 0          | 0          | 0          | 0          | 0          | 0          |
| 0          | 0          | 0          | 0          | 15         | 0          | 0          | 0          | 0          | 0          | 0          | 0          |
| 0          | 0          | 0          | 0          | 11         | 0          | 0          | 0          | 0          | 0          | 0          | 0          |
| 0          | 0          | 0          | 0          | 57         | 0          | 0          | 0          | 0          | 0          | 0          | 0          |
| 0          | 0          | 13         | 0          | 0          | 0          | 0          | 25         | 0          | 0          | 0          | 0          |
| 0          | 0          | 0          | 0          | 0          | 0          | 2          | 0          | 0          | 0          | 0          | 0          |
| 0          | 0          | 0          | 0          | 0          | 0          | 0          | 0          | 0          | 0          | 0          | 0          |
| 0          | 0          | 0          | 0          | 0          | 0          | 0          | 0          | 0          | 0          | 0          | 0          |
| 0          | 0          | 0          | 0          | 0          | 0          | 0          | 0          | 0          | 0          | 4          | 0          |
| 0          | 0          | 5          | 0          | 0          | 0          | 2          | 0          | 0          | 0          | 0          | 0          |
| 0          | 0          | 0          | 0          | 0          | 0          | 0          | 0          | 0          | 0          | 0          | 0          |
| 0          | 1          | 0          | 0          | 0          | 0          | 0          | 0          | 0          | 0          | 0          | 0          |
| 0          | 0          | 0          | 0          | 0          | 0          | 3          | 0          | 0          | 0          | 0          | 0          |
| 0          | 0          | 0          | 0          | 0          | 0          | 3          | 0          | 0          | 0          | 0          | 0          |
| 0          | 0          | 0          | 0          | 0          | 0          | 0          | 0          | 0          | 0          | 0          | 0          |
| 0          | 0          | 0          | 1          | 0          | 0          | 0          | 0          | 0          | 0          | 2          | 0          |
| 0          | 0          | 0          | 0          | 0          | 0          | 0          | 0          | 0          | 0          | 0          | 0          |
| 0          | 0          | 0          | 0          | 2          | 0          | 0          | 0          | 0          | 0          | 0          | 0          |
| 0          | 0          | 0          | 0          | 0          | 0          | 0          | 0          | 0          | 0          | 0          | 0          |
| 2.6E-01    | 1.1E-01    | 2.0E-01    | 8.9E-02    | 2.3E-01    | 1.3E+00    | 6.7E-02    | 1.3E+00    | 2.0E+00    | 2.9E-01    | 1.1E+00    | 7.3E-02    |
| 2.8E-01    | 4.5E-01    | 3.4E-01    | 3.6E-01    | 9.9E-01    | 8.6E-01    | 3.7E-01    | 3.6E-01    | 2.4E-01    | 5.1E-01    | 1.9E-01    | 4.5E-01    |
| 2          | 11         | 1          | 2          | 0          | 0          | 2          | 0          | 2          | 0          | 0          | 0          |
| -1.1E+00   | -1.9E+00   | 0.0E+00    | 7.3E-01    | 0.0E+00    | 0.0E+00    | 3.0E-02    | 0.0E+00    | 4.9E-01    | 0.0E+00    | 0.0E+00    | 0.0E+00    |
| 0.0E+00    |

| Pseudo_Low |
|------------|------------|------------|------------|------------|------------|------------|------------|------------|------------|------------|------------|
| At_F0579   | Atesg0143  | Atpsg0133  | Atesg0002  | Atpsg0087  | Atpsg0184  | At_F0410   | At_F0376   | At_F0577   | Atpsg0086  | Atpsg0175  | At_F0582   |
| -          | NA         | NA         | NA         | NA         | NA         | -          | -          | -          | NA         | NA         | -          |
| 5.3E-03    | 1.0E-03    | 8.3E-03    | 8.0E-03    | 6.6E-03    | 8.8E-03    | 1.1E-02    | 2.6E-03    | 5.4E-03    | 1.4E-02    | 1.5E-03    | 3.9E-03    |
| 4.3E-03    | 1.8E-03    | 4.2E-03    | 8.3E-03    | 9.9E-03    | 1.2E-02    | 3.2E-03    | 1.1E-03    | 3.6E-03    | 9.9E-03    | 4.7E-03    | 2.4E-03    |
| 4.5E-03    | 1.9E-03    | 4.8E-03    | 4.8E-03    | 9.1E-03    | 6.8E-03    | 2.0E-03    | 5.3E-03    | 3.3E-03    | 6.1E-03    | 2.0E-03    | 5.2E-03    |
| 7.8E-02    | 2.9E-02    | 1.4E-01    | 1.5E-01    | 1.0E-01    | 7.4E-02    | 7.7E-02    | 5.6E-02    | 5.7E-02    | 2.3E-01    | 4.6E-02    | 6.6E-02    |
| 6.6E-02    | 4.3E-02    | 5.6E-02    | 8.1E-02    | 1.1E-01    | 1.4E-01    | 7.3E-02    | 2.8E-02    | 7.4E-02    | 1.2E-01    | 6.3E-02    | 6.6E-02    |
| 8.7E-02    | 2.6E-02    | 6.6E-02    | 6.9E-02    | 1.5E-01    | 9.6E-02    | 5.2E-02    | 3.9E-02    | 6.1E-02    | 6.6E-02    | 6.1E-02    | 8.3E-02    |
| 0.0E+00    | 0.0E+00    | 0.0E+00    | 1.2E+01    | 4.3E+00    | 7.7E+00    | 7.8E+00    | 3.8E+00    | 1.3E+01    | 0.0E+00    | 0.0E+00    | 0.0E+00    |
| 0          | 0          | 5          | 0          | 0          | 0          | 0          | 0          | 5          | 0          | 0          | 0          |
| 1          | 0          | 1          | 0          | 1          | 0          | 0          | 0          | 1          | 1          | 0          | 0          |
| 0          | 40         | 100        | 0          | 50         | 0          | 0          | 60         | 50         | 100        | 0          | 0          |
| 0          | 0          | 0          | 0          | 40         | 0          | 9          | 50         | 0          | 50         | 0          | 0          |
| 0          | 42         | 0          | 14         | 7          | 0          | 0          | 29         | 0          | 38         | 0          | 0          |
| 0          | 0          | 0          | 50         | 20         | 0          | 11         | 0          | 0          | 63         | 0          | 0          |
| 0          | 0          | 0          | 20         | 0          | 22         | 100        | 0          | 9          | 0          | 0          | 0          |
| 0          | 0          | 0          | 0          | 33         | 0          | 0          | 0          | 9          | 0          | 0          | 0          |
| 0          | 0          | 0          | 0          | 0          | 0          | 8          | 0          | 16         | 0          | 0          | 0          |
| 0          | 0          | 0          | 0          | 0          | 22         | 6          | 0          | 7          | 0          | 0          | 0          |
| 0          | 0          | 0          | 50         | 0          | 0          | 10         | 8          | 0          | 0          | 0          | 0          |
| 0          | 0          | 0          | 33         | 0          | 0          | 43         | 0          | 100        | 0          | 0          | 0          |
| 0          | 0          | 0          | 0          | 0          | 0          | 0          | 0          | 0          | 0          | 0          | 0          |
| 0          | 0          | 0          | 0          | 0          | 0          | 0          | 0          | 19         | 42         | 0          | 0          |
| 0          | 15         | 0          | 0          | 0          | 0          | 14         | 0          | 59         | 13         | 0          | 13         |
| 0          | 22         | 0          | 0          | 0          | 0          | 22         | 12         | 33         | 27         | 0          | 0          |
| 0          | 75         | 0          | 0          | 0          | 0          | 0          | 0          | 50         | 57         | 0          | 50         |
| 0          | 0          | 100        | 0          | 0          | 0          | 0          | 0          | 0          | 67         | 0          | 0          |
| 0          | 0          | 0          | 0          | 0          | 0          | 0          | 0          | 0          | 75         | 0          | 0          |
| 0          | 0          | 4          | 0          | 0          | 0          | 0          | 0          | 0          | 8          | 0          | 0          |
| 0          | 0          | 0          | 0          | 0          | 0          | 0          | 0          | 0          | 18         | 0          | 0          |
| 0          | 0          | 0          | 0          | 0          | 0          | 0          | 0          | 0          | 0          | 0          | 0          |
| 0          | 0          | 9          | 0          | 0          | 0          | 0          | 0          | 0          | 0          | 0          | 0          |
| 0          | 0          | 5          | 0          | 0          | 0          | 0          | 0          | 0          | 0          | 0          | 0          |
| 0          | 0          | 0          | 0          | 0          | 0          | 0          | 0          | 0          | 0          | 0          | 0          |
| 0          | 0          | 0          | 0          | 0          | 0          | 0          | 0          | 0          | 0          | 0          | 0          |
| 0          | 0          | 0          | 0          | 0          | 0          | 0          | 0          | 0          | 0          | 0          | 0          |
| 0          | 0          | 0          | 0          | 0          | 0          | 0          | 0          | 80         | 0          | 0          | 0          |
| 0          | 0          | 0          | 0          | 0          | 0          | 0          | 0          | 0          | 0          | 0          | 0          |
| 0          | 0          | 0          | 0          | 0          | 0          | 0          | 0          | 11         | 0          | 0          | 0          |
| 0          | 0          | 0          | 0          | 0          | 0          | 4          | 0          | 42         | 0          | 0          | 0          |
| 0          | 0          | 0          | 0          | 0          | 0          | 0          | 0          | 0          | 0          | 0          | 0          |
| 0          | 0          | 0          | 0          | 0          | 0          | 0          | 0          | 0          | 0          | 0          | 0          |
| 0          | 0          | 71         | 0          | 0          | 0          | 0          | 0          | 0          | 4          | 0          | 0          |
| 0          | 0          | 0          | 0          | 0          | 3          | 0          | 0          | 0          | 7          | 0          | 0          |
| 0          | 0          | 0          | 0          | 0          | 0          | 0          | 0          | 0          | 11         | 0          | 0          |
| 0          | 0          | 2          | 0          | 0          | 0          | 0          | 4          | 0          | 10         | 0          | 0          |
| 0          | 0          | 0          | 0          | 0          | 0          | 0          | 0          | 0          | 0          | 0          | 5          |
| 0          | 0          | 0          | 0          | 0          | 0          | 0          | 0          | 0          | 0          | 0          | 0          |
| 0          | 0          | 0          | 0          | 0          | 0          | 0          | 0          | 0          | 0          | 0          | 0          |
| 0          | 0          | 1          | 0          | 1          | 0          | 0          | 0          | 0          | 1          | 0          | 0          |
| 0          | 0          | 0          | 0          | 0          | 0          | 0          | 0          | 0          | 0          | 0          | 0          |
| 3          | 0          | 0          | 0          | 0          | 0          | 0          | 0          | 30         | 0          | 0          | 0          |
| 0          | 0          | 0          | 0          | 0          | 0          | 0          | 0          | 9          | 0          | 0          | 3          |
| 0          | 0          | 0          | 0          | 0          | 0          | 0          | 1          | 9          | 0          | 0          | 0          |
| 0          | 0          | 0          | 0          | 0          | 0          | 1          | 0          | 22         | 0          | 0          | 0          |
| 0          | 0          | 0          | 0          | 0          | 0          | 0          | 0          | 7          | 0          | 0          | 0          |
| 0          | 4          | 0          | 0          | 0          | 0          | 0          | 0          | 0          | 0          | 0          | 0          |
| 1.6E-01    | 2.6E-02    | 1.1E-01    | 2.2E-01    | 9.8E-01    | 3.0E-01    | 1.6E-01    | 9.6E-02    | 1.1E-01    | 2.3E-01    | 9.4E-02    | 9.5E-01    |
| 3.1E-01    | 2.8E-01    | 5.7E-01    | 4.0E-01    | 2.0E-01    | 3.6E-01    | 3.2E-01    | 4.1E-01    | 1.2E-01    | 3.6E-01    | 5.6E-01    | 4.8E-01    |
| 2          | 2          | 2          | 2          | 3          | 0          | 2          | 2          | 0          | 0          | 0          | 0          |
| -1.1E+00   | 9.4E-01    | -4.4E-01   | -2.2E-02   | 0.0E+00    | 0.0E+00    | 2.9E-01    | 4.0E-01    | 0.0E+00    | 0.0E+00    | 0.0E+00    | 0.0E+00    |
| 0.0E+00    |

| Pseudo_Low |
|------------|------------|------------|------------|------------|------------|------------|------------|------------|------------|------------|------------|
| Atesg0158  | Atpsg0046  | Atpsg0097  | Atpsg0080  | Atpsg0099  | Atpsg0132  | At_F0530   | Atpsg0006  | Atpsg0115  | Atpsg0036  | Atpsg0088  | At_F0374   |
| NA         | NA         | NA         | NA         | NA         | NA         | -          | NA         | NA         | NA         | NA         | -          |
| 2.1E-02    | 3.0E-03    | 1.8E-03    | 1.4E-02    | 5.9E-03    | 4.4E-03    | 4.2E-03    | 8.9E-03    | 2.7E-03    | 8.3E-03    | 1.2E-02    | 9.7E-03    |
| 8.6E-03    | 3.1E-03    | 3.9E-03    | 1.8E-02    | 6.0E-03    | 5.9E-03    | 9.8E-03    | 4.9E-03    | 3.0E-03    | 9.2E-03    | 1.9E-03    | 1.0E-02    |
| 1.5E-02    | 3.3E-03    | 1.8E-03    | 8.8E-03    | 7.3E-03    | 1.1E-02    | 1.6E-02    | 5.5E-03    | 4.3E-03    | 4.3E-03    | 2.1E-03    | 9.3E-03    |
| 8.6E-02    | 5.6E-02    | 4.4E-02    | 9.0E-02    | 1.3E-01    | 6.8E-02    | 5.3E-02    | 6.9E-02    | 4.2E-02    | 1.2E-01    | 6.4E-02    | 1.4E-01    |
| 8.5E-02    | 4.3E-02    | 3.9E-02    | 1.3E-01    | 1.2E-01    | 1.0E-01    | 8.8E-02    | 5.5E-02    | 8.5E-02    | 9.5E-02    | 4.3E-02    | 1.1E-01    |
| 8.6E-02    | 3.6E-02    | 4.3E-02    | 9.7E-02    | 1.5E-01    | 1.6E-01    | 1.7E-01    | 9.0E-02    | 5.4E-02    | 1.2E-01    | 4.4E-02    | 7.7E-02    |
| 0.0E+00    | 0.0E+00    | 0.0E+00    | 0.0E+00    | 5.0E+01    | 4.1E+01    | 3.6E+00    | 0.0E+00    | 3.8E+00    | 3.9E+01    | 0.0E+00    | 7.4E+00    |
| 0          | 0          | 0          | 0          | 79         | 71         | 0          | 0          | 0          | 22         | 4          | 29         |
| 0          | 0          | 0          | 0          | 15         | 14         | 0          | 0          | 0          | 3          | 0          | 4          |
| 0          | 0          | 0          | 0          | 100        | 50         | 0          | 0          | 0          | 0          | 0          | 0          |
| 0          | 0          | 0          | 0          | 38         | 30         | 0          | 25         | 0          | 0          | 0          | 0          |
| 0          | 0          | 0          | 0          | 36         | 19         | 0          | 0          | 0          | 67         | 0          | 0          |
| 0          | 0          | 0          | 0          | 67         | 0          | 0          | 0          | 0          | 0          | 0          | 27         |
| 0          | 0          | 0          | 0          | 100        | 80         | 0          | 0          | 0          | 0          | 0          | 100        |
| 0          | 0          | 0          | 0          | 100        | 83         | 32         | 0          | 36         | 83         | 0          | 81         |
| 0          | 0          | 0          | 0          | 54         | 33         | 0          | 0          | 0          | 53         | 0          | 33         |
| 0          | 0          | 0          | 0          | 46         | 24         | 0          | 0          | 0          | 21         | 0          | 8          |
| 0          | 0          | 0          | 0          | 29         | 56         | 0          | 0          | 0          | 35         | 0          | 0          |
| 0          | 0          | 0          | 0          | 100        | 71         | 0          | 0          | 0          | 42         | 0          | 0          |
| 0          | 0          | 0          | 33         | 100        | 100        | 0          | 0          | 0          | 0          | 0          | 0          |
| 0          | 0          | 0          | 0          | 33         | 67         | 56         | 0          | 0          | 0          | 0          | 0          |
| 0          | 0          | 0          | 0          | 50         | 33         | 47         | 44         | 0          | 0          | 0          | 0          |
| 0          | 0          | 0          | 0          | 50         | 25         | 33         | 0          | 0          | 0          | 0          | 0          |
| 0          | 0          | 0          | 0          | 100        | 100        | 0          | 0          | 0          | 0          | 0          | 0          |
| 0          | 0          | 0          | 0          | 100        | 0          | 0          | 0          | 0          | 0          | 0          | 0          |
| 0          | 0          | 0          | 0          | 25         | 0          | 0          | 0          | 0          | 0          | 0          | 0          |
| 0          | 0          | 0          | 0          | 25         | 0          | 0          | 0          | 0          | 36         | 0          | 0          |
| 0          | 0          | 0          | 0          | 36         | 0          | 0          | 0          | 0          | 0          | 0          | 0          |
| 0          | 0          | 0          | 0          | 100        | 0          | 0          | 0          | 0          | 0          | 0          | 80         |
| 0          | 0          | 0          | 0          | 83         | 60         | 0          | 0          | 0          | 14         | 14         | 76         |
| 0          | 0          | 0          | 0          | 43         | 25         | 0          | 0          | 0          | 14         | 0          | 35         |
| 0          | 0          | 0          | 0          | 39         | 38         | 0          | 0          | 0          | 21         | 0          | 3          |
| 0          | 0          | 0          | 0          | 27         | 54         | 0          | 0          | 0          | 0          | 0          | 0          |
| 0          | 0          | 0          | 0          | 100        | 25         | 0          | 0          | 0          | 0          | 0          | 0          |
| 0          | 0          | 0          | 0          | 100        | 0          | 25         | 0          | 0          | 0          | 0          | 0          |
| 0          | 0          | 0          | 0          | 20         | 57         | 36         | 14         | 0          | 0          | 0          | 0          |
| 0          | 0          | 0          | 0          | 29         | 20         | 44         | 0          | 0          | 0          | 0          | 0          |
| 0          | 0          | 0          | 0          | 40         | 50         | 22         | 0          | 0          | 0          | 0          | 0          |
| 0          | 0          | 0          | 0          | 100        | 0          | 0          | 0          | 0          | 0          | 0          | 0          |
| 0          | 0          | 0          | 0          | 17         | 0          | 4          | 3          | 0          | 0          | 0          | 0          |
| 0          | 0          | 0          | 0          | 11         | 0          | 0          | 0          | 0          | 26         | 0          | 0          |
| 0          | 0          | 0          | 0          | 4          | 0          | 0          | 0          | 2          | 12         | 0          | 2          |
| 0          | 0          | 0          | 1          | 9          | 0          | 0          | 0          | 0          | 0          | 0          | 0          |
| 0          | 0          | 0          | 0          | 3          | 0          | 0          | 0          | 4          | 0          | 0          | 0          |
| 0          | 0          | 0          | 0          | 21         | 10         | 0          | 0          | 0          | 0          | 0          | 4          |
| 0          | 0          | 0          | 0          | 3          | 15         | 0          | 0          | 0          | 2          | 0          | 8          |
| 0          | 0          | 0          | 0          | 5          | 3          | 0          | 0          | 0          | 3          | 0          | 5          |
| 0          | 0          | 0          | 0          | 6          | 4          | 0          | 0          | 0          | 0          | 0          | 1          |
| 0          | 0          | 0          | 0          | 17         | 10         | 0          | 0          | 0          | 0          | 0          | 0          |
| 0          | 0          | 0          | 0          | 7          | 7          | 4          | 8          | 4          | 0          | 0          | 0          |
| 2          | 0          | 0          | 0          | 3          | 4          | 28         | 5          | 0          | 0          | 0          | 1          |
| 0          | 0          | 0          | 0          | 9          | 19         | 25         | 0          | 0          | 0          | 0          | 0          |
| 0          | 0          | 0          | 0          | 7          | 0          | 9          | 0          | 0          | 0          | 0          | 0          |
| 0          | 0          | 0          | 0          | 0          | 0          | 0          | 0          | 0          | 0          | 0          | 0          |
| 1.1E-01    | 1.6E+00    | 6.6E-02    | 3.1E-01    | 1.2E-01    | 8.4E-02    | 6.5E-01    | 3.8E-02    | 3.4E-01    | 1.7E-01    | 9.7E-02    | 1.2E+00    |
| 2.1E-01    | 8.5E-01    | 1.7E-01    | 4.0E-01    | 3.6E-01    | 8.5E-02    | 3.2E-01    | 4.5E-01    | 2.8E-01    | 3.2E-01    | 3.1E-01    | 4.0E-01    |
| 0          | 2          | 0          | 2          | 0          | 0          | 2          | 0          | 0          | 0          | 2          | 2          |
| 0.0E+00    | -4.5E-01   | 0.0E+00    | -6.1E-01   | 0.0E+00    | 0.0E+00    | -1.2E+00   | 0.0E+00    | 0.0E+00    | 0.0E+00    | -1.3E+00   | 4.4E-01    |
| 0.0E+00    |

| Pseudo_Low |
|------------|------------|------------|------------|------------|------------|------------|------------|------------|------------|------------|------------|
| Atpsg0003  | Atesg0062  | At_F0246   | Atpsg0112  | At_F0150   | At_F0167   | At_F0325   | At_F0358   | At_F0518   | Atesg0077  | Atesg0134  | Atpsg0079  |
| NA         | NA         | -          | NA         | -          | -          | -          | -          | -          | NA         | NA         | NA         |
| 1.2E-02    | 1.0E-02    | 5.2E-03    | 1.3E-02    | 4.7E-03    | 4.1E-03    | 1.2E-03    | 2.4E-03    | 2.0E-03    | 4.1E-03    | 1.4E-02    | 1.4E-02    |
| 1.6E-02    | 5.0E-03    | 3.9E-03    | 7.1E-03    | 5.3E-03    | 2.6E-03    | 3.6E-03    | 9.7E-04    | 1.0E-03    | 2.1E-03    | 2.6E-03    | 8.7E-03    |
| 1.5E-02    | 6.5E-03    | 2.2E-03    | 4.6E-03    | 2.2E-03    | 2.2E-03    | 1.1E-02    | 5.2E-03    | 1.8E-04    | 2.4E-03    | 2.4E-03    | 3.4E-03    |
| 9.1E-02    | 8.1E-02    | 7.8E-02    | 8.1E-02    | 7.1E-02    | 7.7E-02    | 5.6E-02    | 6.0E-02    | 5.7E-02    | 5.9E-02    | 2.2E-01    | 1.4E-01    |
| 1.2E-01    | 6.8E-02    | 4.0E-02    | 6.4E-02    | 5.1E-02    | 6.3E-02    | 7.9E-02    | 3.7E-02    | 4.3E-02    | 4.2E-02    | 5.2E-02    | 9.8E-02    |
| 6.7E-02    | 1.2E-01    | 4.3E-02    | 8.1E-02    | 6.0E-02    | 8.5E-02    | 1.7E-01    | 1.1E-01    | 1.9E-02    | 3.3E-02    | 3.1E-02    | 9.2E-02    |
| 0.0E+00    | 0.0E+00    | 0.0E+00    | 0.0E+00    | 1.2E+00    | 6.3E+00    | 1.6E+01    | 0.0E+00    | 0.0E+00    | 0.0E+00    | 8.3E+00    | 4.4E+00    |
| 0          | 0          | 0          | 0          | 0          | 0          | 29         | 0          | 0          | 0          | 0          | 0          |
| 0          | 0          | 0          | 0          | 0          | 0          | 7          | 0          | 0          | 0          | 0          | 0          |
| 0          | 0          | 0          | 0          | 0          | 0          | 0          | 0          | 0          | 0          | 0          | 0          |
| 33         | 0          | 0          | 0          | 0          | 0          | 0          | 0          | 0          | 0          | 0          | 0          |
| 8          | 0          | 0          | 0          | 0          | 0          | 0          | 0          | 0          | 0          | 7          | 0          |
| 0          | 0          | 0          | 0          | 0          | 0          | 0          | 0          | 0          | 0          | 0          | 13         |
| 0          | 0          | 0          | 0          | 0          | 40         | 0          | 0          | 0          | 0          | 0          | 14         |
| 0          | 0          | 0          | 0          | 7          | 0          | 0          | 0          | 0          | 0          | 0          | 0          |
| 0          | 0          | 0          | 0          | 0          | 13         | 0          | 0          | 0          | 0          | 0          | 0          |
| 0          | 0          | 0          | 0          | 0          | 0          | 5          | 0          | 0          | 0          | 6          | 0          |
| 0          | 0          | 0          | 0          | 0          | 14         | 42         | 0          | 0          | 0          | 17         | 11         |
| 0          | 0          | 0          | 0          | 0          | 0          | 86         | 0          | 0          | 0          | 31         | 13         |
| 0          | 0          | 0          | 0          | 0          | 67         | 100        | 0          | 0          | 0          | 20         | 0          |
| 0          | 29         | 0          | 0          | 0          | 17         | 0          | 0          | 24         | 0          | 25         | 0          |
| 0          | 20         | 0          | 0          | 0          | 0          | 19         | 15         | 0          | 0          | 0          | 14         |
| 0          | 100        | 0          | 0          | 0          | 0          | 17         | 27         | 0          | 60         | 0          | 50         |
| 0          | 0          | 0          | 0          | 0          | 0          | 15         | 88         | 0          | 0          | 0          | 100        |
| 0          | 0          | 0          | 0          | 0          | 0          | 0          | 0          | 0          | 0          | 0          | 0          |
| 67         | 0          | 0          | 0          | 0          | 0          | 0          | 0          | 0          | 0          | 0          | 0          |
| 0          | 0          | 0          | 0          | 0          | 0          | 0          | 0          | 0          | 0          | 0          | 0          |
| 0          | 0          | 0          | 0          | 0          | 0          | 0          | 0          | 0          | 0          | 0          | 0          |
| 0          | 0          | 0          | 0          | 0          | 0          | 0          | 0          | 0          | 0          | 0          | 0          |
| 0          | 0          | 0          | 0          | 0          | 0          | 0          | 0          | 0          | 0          | 0          | 0          |
| 0          | 0          | 0          | 0          | 0          | 0          | 0          | 0          | 0          | 0          | 0          | 0          |
| 0          | 0          | 0          | 0          | 0          | 0          | 44         | 0          | 0          | 0          | 0          | 0          |
| 0          | 0          | 0          | 0          | 0          | 0          | 89         | 0          | 0          | 0          | 0          | 0          |
| 0          | 0          | 0          | 0          | 0          | 0          | 80         | 0          | 0          | 0          | 0          | 0          |
| 0          | 0          | 0          | 0          | 0          | 0          | 50         | 0          | 0          | 0          | 0          | 0          |
| 0          | 23         | 0          | 0          | 0          | 0          | 0          | 25         | 0          | 0          | 0          | 0          |
| 0          | 100        | 0          | 0          | 0          | 0          | 9          | 0          | 0          | 0          | 0          | 20         |
| 0          | 0          | 0          | 0          | 0          | 0          | 0          | 50         | 0          | 0          | 0          | 100        |
| 0          | 0          | 0          | 2          | 0          | 0          | 0          | 0          | 0          | 0          | 0          | 0          |
| 11         | 0          | 0          | 0          | 0          | 0          | 0          | 0          | 0          | 0          | 0          | 0          |
| 5          | 0          | 0          | 0          | 0          | 0          | 0          | 0          | 0          | 0          | 4          | 0          |
| 0          | 0          | 0          | 0          | 2          | 0          | 0          | 0          | 0          | 0          | 0          | 0          |
| 0          | 0          | 0          | 0          | 0          | 0          | 0          | 0          | 0          | 0          | 0          | 0          |
| 0          | 0          | 0          | 0          | 0          | 0          | 0          | 0          | 0          | 0          | 0          | 0          |
| 0          | 0          | 0          | 0          | 0          | 0          | 0          | 0          | 0          | 0          | 0          | 0          |
| 0          | 0          | 0          | 0          | 0          | 0          | 0          | 0          | 0          | 0          | 0          | 0          |
| 0          | 0          | 0          | 0          | 0          | 0          | 24         | 0          | 0          | 0          | 0          | 0          |
| 0          | 0          | 0          | 0          | 0          | 0          | 9          | 0          | 0          | 0          | 0          | 0          |
| 0          | 4          | 0          | 0          | 0          | 0          | 50         | 0          | 0          | 0          | 0          | 0          |
| 0          | 3          | 0          | 0          | 0          | 0          | 0          | 0          | 0          | 0          | 2          | 4          |
| 0          | 9          | 0          | 0          | 0          | 0          | 1          | 1          | 1          | 0          | 0          | 1          |
| 0          | 37         | 0          | 0          | 0          | 0          | 0          | 2          | 0          | 0          | 0          | 4          |
| 0          | 0          | 0          | 0          | 0          | 0          | 0          | 0          | 0          | 0          | 0          | 0          |
| 1.4E-01    | 1.1E-01    | 0.0E+00    | 4.5E-01    | 7.8E-01    | 1.4E-01    | 3.5E-01    | 2.3E-01    | 3.5E-01    | 5.4E-02    | 5.4E-02    | 5.3E-01    |
| 5.0E-01    | 2.0E-01    | 2.9E-01    | 3.3E-01    | 2.2E-01    | 1.7E-01    | 2.3E-01    | 1.3E-01    | 2.8E-01    | 4.3E-01    | 4.2E-01    | 6.2E-01    |
| 0          | 2          | 3          | 0          | 0          | 2          | 2          | 1          | 2          | 0          | 2          | 5          |
| 0.0E+00    | 6.2E-01    | -2.6E-01   | 0.0E+00    | 0.0E+00    | 0.0E+00    | -1.8E+00   | 0.0E+00    | 2.0E-01    | 0.0E+00    | -3.1E+00   | -7.6E-01   |
| 0.0E+00    |

| Pseudo_Low | Pseudo_Low | Pseudo_Low | Pseudo_Low | Pseudo_Rare |
|------------|------------|------------|------------|-------------|-------------|-------------|-------------|-------------|-------------|-------------|
| Atpsg0091  | Atpsg0098  | Atpsg0148  | Atpsg0165  | At_F0036    | At_F0112    | At_F0118    | At_F0185    | At_F0212    | At_F0249    | At_F0257    |
| NA         | NA         | NA         | NA         | -           | -           | -           | -           | -           | -           | -           |
| 5.9E-03    | 3.4E-03    | 1.0E-02    | 1.3E-03    | 4.9E-03     | 7.5E-03     | 1.7E-02     | 3.0E-03     | 1.0E-02     | 6.4E-03     | 6.9E-03     |
| 5.8E-03    | 1.3E-03    | 7.0E-03    | 1.1E-03    | 4.2E-03     | 1.0E-02     | 1.4E-02     | 1.6E-03     | 1.3E-02     | 8.6E-03     | 5.0E-04     |
| 5.0E-03    | 5.2E-03    | 6.3E-03    | 1.1E-03    | 2.1E-03     | 5.9E-03     | 9.7E-03     | 1.1E-03     | 8.4E-03     | 7.4E-03     | 5.7E-03     |
| 7.0E-02    | 9.9E-02    | 1.1E-01    | 3.2E-02    | 7.5E-02     | 8.6E-02     | 9.4E-02     | 3.1E-02     | 1.3E-01     | 9.4E-02     | 5.4E-02     |
| 4.9E-02    | 5.2E-02    | 1.4E-01    | 3.1E-02    | 7.5E-02     | 8.5E-02     | 8.6E-02     | 2.5E-02     | 1.2E-01     | 9.8E-02     | 2.7E-02     |
| 7.5E-02    | 1.0E-01    | 1.6E-01    | 1.9E-02    | 7.6E-02     | 8.0E-02     | 8.1E-02     | 1.4E-02     | 1.4E-01     | 1.1E-01     | 8.7E-02     |
| 1.1E+00    | 0.0E+00    | 5.0E+01    | 0.0E+00    | 4.6E+01     | 8.3E+00     | 0.0E+00     | 5.8E+00     | 4.8E+01     | 8.0E+00     | 2.6E+00     |
| 0          | 0          | 69         | 3          | 38          | 3           | 0           | 0           | 73          | 6           | 0           |
| 0          | 0          | 9          | 0          | 4           | 0           | 0           | 0           | 7           | 1           | 0           |
| 0          | 0          | 67         | 0          | 0           | 0           | 0           | 0           | 0           | 0           | 0           |
| 0          | 0          | 0          | 0          | 0           | 0           | 0           | 0           | 0           | 0           | 0           |
| 6          | 0          | 8          | 0          | 0           | 0           | 0           | 0           | 0           | 0           | 0           |
| 0          | 0          | 0          | 0          | 27          | 18          | 0           | 0           | 46          | 0           | 0           |
| 0          | 0          | 75         | 0          | 100         | 0           | 0           | 0           | 86          | 0           | 0           |
| 0          | 0          | 92         | 0          | 89          | 33          | 0           | 25          | 91          | 44          | 0           |
| 0          | 0          | 50         | 0          | 53          | 0           | 0           | 0           | 50          | 0           | 8           |
| 5          | 0          | 12         | 0          | 47          | 0           | 0           | 0           | 22          | 11          | 0           |
| 0          | 0          | 15         | 0          | 44          | 20          | 0           | 0           | 43          | 0           | 0           |
| 0          | 0          | 100        | 0          | 100         | 0           | 0           | 20          | 100         | 0           | 0           |
| 0          | 0          | 0          | 0          | 0           | 0           | 0           | 0           | 0           | 0           | 0           |
| 0          | 0          | 6          | 0          | 0           | 0           | 0           | 0           | 14          | 0           | 0           |
| 0          | 8          | 20         | 0          | 0           | 0           | 0           | 0           | 29          | 0           | 45          |
| 0          | 17         | 29         | 0          | 0           | 0           | 0           | 0           | 0           | 0           | 25          |
| 0          | 0          | 100        | 57         | 0           | 20          | 0           | 0           | 75          | 0           | 67          |
| 0          | 0          | 0          | 0          | 0           | 0           | 0           | 0           | 0           | 0           | 0           |
| 0          | 0          | 0          | 0          | 0           | 0           | 0           | 0           | 0           | 0           | 0           |
| 0          | 0          | 0          | 0          | 8           | 0           | 0           | 0           | 0           | 0           | 0           |
| 0          | 0          | 0          | 0          | 20          | 9           | 0           | 0           | 42          | 0           | 0           |
| 0          | 0          | 100        | 20         | 83          | 0           | 0           | 0           | 33          | 0           | 0           |
| 0          | 0          | 67         | 0          | 71          | 14          | 0           | 0           | 50          | 18          | 0           |
| 0          | 0          | 13         | 0          | 14          | 0           | 0           | 0           | 47          | 0           | 0           |
| 0          | 0          | 11         | 0          | 10          | 0           | 0           | 0           | 50          | 0           | 0           |
| 0          | 0          | 22         | 0          | 14          | 0           | 0           | 0           | 20          | 0           | 0           |
| 0          | 0          | 50         | 20         | 0           | 0           | 0           | 0           | 100         | 0           | 0           |
| 0          | 0          | 0          | 0          | 0           | 0           | 0           | 0           | 0           | 0           | 0           |
| 0          | 0          | 27         | 0          | 0           | 0           | 0           | 0           | 8           | 0           | 0           |
| 0          | 0          | 0          | 0          | 0           | 0           | 0           | 0           | 7           | 0           | 13          |
| 0          | 0          | 20         | 0          | 0           | 0           | 0           | 0           | 0           | 0           | 33          |
| 0          | 0          | 0          | 0          | 0           | 0           | 0           | 0           | 33          | 0           | 0           |
| 0          | 0          | 0          | 0          | 0           | 0           | 0           | 0           | 0           | 0           | 0           |
| 0          | 0          | 1          | 0          | 0           | 0           | 0           | 0           | 0           | 0           | 0           |
| 0          | 0          | 0          | 0          | 0           | 0           | 1           | 0           | 1           | 0           | 1           |
| 0          | 0          | 0          | 0          | 2           | 0           | 0           | 0           | 8           | 0           | 0           |
| 0          | 0          | 6          | 0          | 8           | 0           | 0           | 0           | 0           | 0           | 4           |
| 0          | 0          | 9          | 0          | 12          | 0           | 0           | 0           | 5           | 5           | 0           |
| 0          | 0          | 1          | 0          | 2           | 0           | 0           | 0           | 0           | 0           | 0           |
| 0          | 0          | 0          | 0          | 3           | 0           | 0           | 0           | 5           | 0           | 0           |
| 0          | 0          | 0          | 0          | 2           | 0           | 0           | 0           | 2           | 0           | 0           |
| 0          | 0          | 3          | 0          | 0           | 0           | 0           | 0           | 11          | 0           | 0           |
| 0          | 0          | 0          | 0          | 0           | 0           | 3           | 0           | 0           | 0           | 0           |
| 0          | 0          | 0          | 2          | 0           | 0           | 0           | 0           | 2           | 0           | 0           |
| 0          | 0          | 0          | 0          | 0           | 0           | 0           | 0           | 1           | 0           | 2           |
| 0          | 0          | 4          | 0          | 0           | 0           | 0           | 0           | 4           | 0           | 3           |
| 0          | 0          | 2          | 0          | 0           | 0           | 0           | 0           | 0           | 4           | 0           |
| 2.4E+00    | 2.5E-01    | 5.3E-01    | 8.2E-02    | 5.6E-01     | 7.1E-01     | 1.3E+00     | 4.4E-01     | 6.1E-01     | 2.5E+00     | 8.8E-02     |
| 2.8E-01    | 3.6E-01    | 3.8E-01    | 3.9E-01    | 6.3E-02     | 4.0E-01     | 1.5E-01     | 5.6E-02     | 3.0E-01     | 3.2E-01     | 3.1E-01     |
| 0          | 0          | 0          | 0          | 0           | 2           | 2           | 0           | 2           | 2           | 12          |
| 0.0E+00    | 0.0E+00    | 0.0E+00    | 0.0E+00    | 0.0E+00     | 1.3E-01     | 2.5E-01     | 0.0E+00     | 2.7E-01     | -5.5E-02    | 9.4E-01     |
| 0.0E+00    | 0.0E+00    | 0.0E+00    | 0.0E+00    | 1.1E+01     | 4.0E+00     | 4.0E+00     | 1.5E+01     | 3.2E+00     | 1.3E+01     | 9.8E+00     |

| Pseudo_Rare |
|-------------|-------------|-------------|-------------|-------------|-------------|-------------|-------------|-------------|-------------|-------------|
| At_F0290    | At_F0312    | At_F0331    | At_F0339    | At_F0341    | At_F0356    | At_F0375    | At_F0412    | At_F0425    | At_F0472    | At_F0473    |
| -           | -           | -           | bm          | -           | -           | -           | -           | -           | -           | -           |
| 8.8E-03     | 8.1E-03     | 2.2E-03     | 1.1E-02     | 2.8E-03     | 2.4E-03     | 4.6E-03     | 3.9E-03     | 7.2E-03     | 1.8E-03     | 1.8E-03     |
| 6.6E-03     | 4.0E-03     | 3.1E-03     | 8.5E-03     | 2.6E-03     | 3.0E-03     | 3.8E-03     | 5.0E-03     | 1.6E-02     | 4.2E-03     | 7.9E-03     |
| 3.6E-03     | 5.3E-03     | 4.5E-03     | 1.1E-02     | 1.3E-03     | 2.5E-03     | 8.2E-03     | 3.4E-03     | 5.7E-03     | 8.8E-03     | 7.0E-03     |
| 1.7E-01     | 9.4E-02     | 4.2E-02     | 2.3E-01     | 5.6E-02     | 7.9E-02     | 9.5E-02     | 6.4E-02     | 9.8E-02     | 3.7E-02     | 2.8E-02     |
| 1.0E-01     | 6.9E-02     | 4.7E-02     | 1.3E-01     | 4.2E-02     | 6.9E-02     | 1.0E-01     | 7.1E-02     | 1.4E-01     | 3.8E-02     | 6.4E-02     |
| 7.5E-02     | 7.7E-02     | 5.8E-02     | 1.4E-01     | 3.6E-02     | 6.3E-02     | 1.5E-01     | 6.7E-02     | 8.7E-02     | 5.6E-02     | 7.1E-02     |
| 0.0E+00     | 0.0E+00     | 4.3E+00     | 2.6E+01     | 8.3E+00     | 0.0E+00     | 6.6E+00     | 1.3E+01     | 0.0E+00     | 0.0E+00     | 0.0E+00     |
| 0           | 0           | 0           | 0           | 0           | 0           | 14          | 0           | 0           | 0           | 0           |
| 1           | 0           | 0           | 0           | 0           | 0           | 1           | 0           | 0           | 1           | 0           |
| 50          | 0           | 0           | 0           | 0           | 0           | 50          | 50          | 0           | 0           | 0           |
| 13          | 11          | 0           | 0           | 0           | 0           | 0           | 33          | 0           | 0           | 0           |
| 0           | 0           | 0           | 0           | 0           | 0           | 0           | 0           | 0           | 0           | 0           |
| 0           | 0           | 0           | 0           | 0           | 0           | 0           | 18          | 0           | 0           | 0           |
| 0           | 0           | 0           | 50          | 0           | 0           | 0           | 13          | 0           | 0           | 0           |
| 0           | 0           | 18          | 0           | 0           | 0           | 0           | 29          | 0           | 0           | 0           |
| 0           | 0           | 3           | 14          | 0           | 0           | 0           | 19          | 0           | 0           | 0           |
| 0           | 0           | 0           | 11          | 19          | 0           | 0           | 11          | 0           | 0           | 0           |
| 0           | 0           | 0           | 60          | 29          | 0           | 0           | 0           | 0           | 0           | 0           |
| 0           | 0           | 0           | 88          | 0           | 0           | 100         | 40          | 0           | 0           | 0           |
| 0           | 0           | 0           | 0           | 0           | 0           | 83          | 0           | 0           | 0           | 0           |
| 18          | 0           | 0           | 0           | 0           | 0           | 57          | 0           | 0           | 0           | 0           |
| 17          | 0           | 0           | 0           | 0           | 0           | 0           | 0           | 0           | 0           | 0           |
| 0           | 0           | 0           | 0           | 0           | 0           | 36          | 0           | 0           | 0           | 0           |
| 100         | 0           | 25          | 0           | 0           | 0           | 0           | 0           | 0           | 0           | 100         |
| 0           | 0           | 0           | 0           | 0           | 0           | 100         | 0           | 0           | 0           | 0           |
| 25          | 0           | 0           | 0           | 0           | 0           | 0           | 0           | 0           | 0           | 0           |
| 0           | 0           | 0           | 0           | 0           | 0           | 0           | 0           | 0           | 0           | 0           |
| 0           | 0           | 0           | 0           | 0           | 0           | 0           | 0           | 0           | 0           | 0           |
| 0           | 0           | 0           | 0           | 0           | 0           | 0           | 0           | 0           | 0           | 0           |
| 0           | 0           | 0           | 0           | 0           | 0           | 0           | 0           | 0           | 0           | 0           |
| 0           | 0           | 0           | 0           | 0           | 0           | 0           | 0           | 0           | 0           | 0           |
| 0           | 0           | 0           | 0           | 0           | 0           | 0           | 0           | 0           | 0           | 0           |
| 0           | 0           | 0           | 0           | 0           | 0           | 0           | 0           | 0           | 0           | 0           |
| 0           | 0           | 0           | 0           | 0           | 0           | 0           | 0           | 0           | 0           | 0           |
| 0           | 0           | 0           | 0           | 0           | 0           | 67          | 0           | 0           | 0           | 0           |
| 0           | 0           | 0           | 0           | 0           | 0           | 50          | 0           | 0           | 0           | 0           |
| 7           | 0           | 0           | 0           | 0           | 0           | 50          | 0           | 0           | 0           | 0           |
| 0           | 0           | 0           | 0           | 0           | 0           | 0           | 0           | 0           | 0           | 0           |
| 0           | 0           | 0           | 0           | 0           | 0           | 13          | 0           | 0           | 0           | 0           |
| 0           | 0           | 33          | 0           | 0           | 0           | 0           | 0           | 0           | 0           | 60          |
| 0           | 0           | 0           | 0           | 0           | 0           | 53          | 0           | 0           | 0           | 0           |
| 4           | 0           | 0           | 0           | 0           | 0           | 0           | 0           | 0           | 0           | 0           |
| 0           | 0           | 0           | 0           | 0           | 0           | 0           | 0           | 0           | 0           | 0           |
| 0           | 0           | 0           | 0           | 0           | 2           | 0           | 0           | 0           | 0           | 0           |
| 4           | 0           | 0           | 0           | 0           | 0           | 0           | 0           | 0           | 0           | 0           |
| 0           | 0           | 0           | 0           | 0           | 0           | 0           | 0           | 0           | 2           | 0           |
| 2           | 0           | 0           | 0           | 0           | 0           | 0           | 0           | 0           | 0           | 0           |
| 0           | 0           | 0           | 0           | 0           | 0           | 0           | 0           | 0           | 0           | 0           |
| 0           | 0           | 0           | 0           | 0           | 0           | 0           | 0           | 0           | 0           | 0           |
| 0           | 0           | 0           | 0           | 0           | 0           | 4           | 0           | 0           | 0           | 0           |
| 0           | 0           | 0           | 8           | 0           | 0           | 10          | 0           | 0           | 0           | 0           |
| 4           | 0           | 0           | 0           | 0           | 0           | 0           | 0           | 0           | 0           | 0           |
| 0           | 0           | 0           | 0           | 0           | 0           | 0           | 0           | 0           | 0           | 0           |
| 0           | 0           | 0           | 0           | 0           | 0           | 0           | 0           | 0           | 0           | 2           |
| 0           | 4           | 12          | 6           | 0           | 0           | 0           | 0           | 0           | 0           | 17          |
| 2.8E-01     | 1.1E-01     | 5.1E-01     | 1.2E+00     | 4.7E-02     | 1.6E-01     | 5.2E-01     | 1.9E-01     | 0.0E+00     | 3.1E-02     | 7.7E-01     |
| 1.5E-01     | 9.2E-02     | 8.0E-01     | 2.6E-01     | 3.9E-01     | 3.9E-01     | 3.0E-01     | 2.4E-01     | 1.1E-01     | 4.2E-01     | 1.1E-01     |
| 8           | 0           | 0           | 1           | 2           | 0           | 2           | 3           | 2           | 0           | 0           |
| 0.0E+00     | 0.0E+00     | 0.0E+00     | 0.0E+00     | 1.4E-01     | 0.0E+00     | -3.3E-01    | -2.7E-01    | -2.9E-01    | 0.0E+00     | 0.0E+00     |
| 1.1E+00     | 2.3E+01     | 6.6E+00     | 4.9E+00     | 6.0E+00     | 1.4E+01     | 1.9E+01     | 8.1E+00     | 2.4E+00     | 1.6E+01     | 1.7E+01     |

| Pseudo_Rare |
|-------------|-------------|-------------|-------------|-------------|-------------|-------------|-------------|-------------|-------------|-------------|
| At_F0476    | At_F0618    | At_F0661    | At_F0682    | At_F0043    | At_F0045    | At_F0075    | At_F0078    | At_F0084    | At_F0094    | At_F0117    |
| -           | -           | -           | -           | -           | -           | -           | -           | -           | -           | -           |
| 4.8E-03     | 7.5E-03     | 1.2E-02     | 5.9E-03     | 1.9E-03     | 7.0E-03     | 2.9E-03     | 4.5E-03     | 1.7E-02     | 5.8E-03     | 1.7E-03     |
| 1.6E-02     | 2.9E-03     | 1.2E-02     | 2.5E-02     | 3.4E-03     | 7.4E-03     | 4.3E-03     | 1.5E-02     | 1.6E-02     | 1.0E-02     | 3.2E-03     |
| 7.1E-03     | 5.6E-03     | 1.0E-02     | 4.3E-03     | 5.0E-03     | 3.9E-03     | 3.6E-03     | 9.3E-03     | 8.3E-03     | 8.9E-03     | 1.0E-02     |
| 7.2E-02     | 1.2E-01     | 9.2E-02     | 1.3E-01     | 6.2E-02     | 1.2E-01     | 8.6E-02     | 8.5E-02     | 2.3E-01     | 7.1E-02     | 4.4E-02     |
| 1.5E-01     | 5.2E-02     | 9.3E-02     | 1.1E-01     | 3.8E-02     | 6.5E-02     | 8.4E-02     | 1.2E-01     | 2.5E-01     | 9.0E-02     | 3.2E-02     |
| 9.4E-02     | 7.3E-02     | 1.0E-01     | 5.2E-02     | 3.9E-02     | 4.7E-02     | 6.3E-02     | 7.5E-02     | 2.3E-01     | 8.9E-02     | 4.6E-02     |
| 3.3E+00     | 8.2E+00     | 6.3E+00     | 3.5E+01     | 1.6E+00     | 0.0E+00     | 0.0E+00     | 1.7E+00     | 4.3E+01     | 1.0E+01     | 1.3E+01     |
| 0           | 6           | 0           | 54          | 0           | 4           | 0           | 0           | 74          | 0           | 0           |
| 0           | 0           | 0           | 2           | 0           | 0           | 0           | 1           | 4           | 1           | 0           |
| 0           | 33          | 0           | 0           | 0           | 75          | 0           | 100         | 100         | 0           | 0           |
| 0           | 70          | 14          | 57          | 0           | 0           | 0           | 67          | 50          | 0           | 0           |
| 0           | 15          | 0           | 4           | 0           | 0           | 0           | 50          | 25          | 8           | 0           |
| 6           | 9           | 0           | 55          | 0           | 0           | 0           | 0           | 0           | 0           | 6           |
| 0           | 0           | 0           | 100         | 0           | 0           | 0           | 0           | 100         | 0           | 63          |
| 8           | 0           | 0           | 92          | 7           | 0           | 0           | 11          | 84          | 11          | 36          |
| 0           | 0           | 0           | 100         | 0           | 0           | 0           | 0           | 67          | 0           | 22          |
| 0           | 0           | 0           | 0           | 0           | 0           | 0           | 0           | 7           | 39          | 0           |
| 8           | 0           | 0           | 27          | 0           | 0           | 0           | 0           | 30          | 0           | 0           |
| 0           | 58          | 50          | 0           | 0           | 0           | 0           | 0           | 83          | 0           | 0           |
| 0           | 0           | 0           | 0           | 0           | 0           | 0           | 0           | 100         | 20          | 0           |
| 0           | 0           | 15          | 0           | 0           | 0           | 0           | 0           | 0           | 0           | 0           |
| 0           | 0           | 0           | 0           | 0           | 0           | 0           | 10          | 0           | 0           | 0           |
| 8           | 0           | 0           | 0           | 0           | 15          | 0           | 44          | 20          | 0           | 0           |
| 0           | 0           | 0           | 0           | 0           | 29          | 0           | 71          | 25          | 0           | 0           |
| 0           | 50          | 0           | 0           | 0           | 0           | 0           | 83          | 71          | 0           | 0           |
| 0           | 73          | 0           | 14          | 0           | 0           | 0           | 73          | 50          | 0           | 0           |
| 0           | 50          | 0           | 17          | 0           | 0           | 0           | 33          | 33          | 0           | 0           |
| 0           | 0           | 0           | 53          | 0           | 0           | 0           | 25          | 0           | 0           | 0           |
| 0           | 0           | 0           | 83          | 0           | 0           | 0           | 0           | 100         | 0           | 0           |
| 0           | 0           | 0           | 89          | 0           | 0           | 0           | 0           | 82          | 0           | 0           |
| 0           | 0           | 0           | 33          | 0           | 0           | 0           | 0           | 36          | 0           | 0           |
| 0           | 0           | 0           | 41          | 0           | 0           | 0           | 0           | 9           | 0           | 0           |
| 0           | 0           | 0           | 10          | 0           | 27          | 0           | 0           | 25          | 0           | 0           |
| 0           | 22          | 0           | 0           | 0           | 0           | 0           | 0           | 67          | 0           | 0           |
| 0           | 0           | 0           | 0           | 0           | 0           | 0           | 0           | 67          | 0           | 0           |
| 0           | 0           | 33          | 0           | 0           | 0           | 0           | 0           | 33          | 0           | 0           |
| 0           | 0           | 0           | 0           | 0           | 0           | 0           | 0           | 0           | 0           | 0           |
| 0           | 0           | 0           | 0           | 0           | 0           | 0           | 0           | 0           | 0           | 0           |
| 0           | 0           | 0           | 0           | 0           | 0           | 0           | 0           | 0           | 0           | 0           |
| 0           | 8           | 0           | 0           | 0           | 4           | 0           | 13          | 10          | 0           | 0           |
| 0           | 23          | 0           | 5           | 0           | 4           | 0           | 0           | 5           | 0           | 0           |
| 0           | 0           | 0           | 15          | 0           | 0           | 3           | 7           | 5           | 0           | 0           |
| 0           | 0           | 0           | 2           | 0           | 0           | 0           | 13          | 0           | 0           | 0           |
| 0           | 0           | 0           | 3           | 0           | 0           | 0           | 0           | 10          | 0           | 0           |
| 0           | 0           | 0           | 4           | 0           | 0           | 0           | 0           | 8           | 0           | 0           |
| 0           | 0           | 0           | 2           | 0           | 0           | 0           | 3           | 1           | 0           | 0           |
| 0           | 0           | 0           | 10          | 0           | 0           | 0           | 0           | 0           | 0           | 0           |
| 0           | 0           | 0           | 0           | 0           | 2           | 0           | 0           | 3           | 1           | 0           |
| 0           | 2           | 0           | 0           | 0           | 0           | 0           | 0           | 0           | 0           | 0           |
| 0           | 0           | 0           | 0           | 0           | 0           | 0           | 0           | 0           | 0           | 0           |
| 0           | 0           | 4           | 0           | 0           | 0           | 0           | 0           | 0           | 0           | 0           |
| 0           | 0           | 0           | 0           | 0           | 0           | 0           | 0           | 0           | 0           | 0           |
| 5           | 0           | 0           | 1           | 3           | 0           | 0           | 0           | 0           | 0           | 0           |
| 0           | 0           | 0           | 3           | 0           | 0           | 4           | 0           | 0           | 0           | 0           |
| 5.8E-01     | 2.5E-01     | 9.3E-01     | 8.5E-02     | 7.1E-02     | 2.1E-01     | 2.2E-01     | 5.2E-01     | 5.5E-01     | 1.9E-01     | 4.7E-01     |
| 7.7E-02     | 1.5E-01     | 3.7E-01     | 2.5E-01     | 2.1E-01     | 2.2E-01     | 2.4E-01     | 2.2E-01     | 1.3E-01     | 2.3E-01     | 3.7E-01     |
| 2           | 0           | 2           | 2           | 2           | 0           | 2           | 2           | 0           | 8           | 0           |
| 3.3E-01     | 0.0E+00     | -3.6E-01    | 1.1E-01     | 4.0E-01     | 0.0E+00     | -7.0E-02    | -5.4E-01    | 0.0E+00     | 5.1E-02     | 0.0E+00     |
| 2.4E+00     | 1.7E+01     | 7.5E+00     | 1.3E+01     | 0.0E+00     |



| Pseudo_Rare |
|-------------|-------------|-------------|-------------|-------------|-------------|-------------|-------------|-------------|-------------|-------------|
| At_F0144    | At_F0166    | At_F0171    | At_F0177    | At_F0184    | At_F0210    | At_F0229    | At_F0231    | At_F0272    | At_F0281    | At_F0296    |
| -           | -           | -           | -           | -           | -           | -           | -           | -           | -           | -           |
| 1.4E-03     | 2.8E-03     | 1.4E-03     | 5.6E-03     | 2.9E-03     | 8.0E-03     | 5.0E-03     | 3.5E-03     | 8.0E-03     | 7.8E-03     | 4.6E-03     |
| 1.5E-03     | 3.1E-03     | 9.6E-04     | 8.4E-03     | 1.6E-03     | 1.1E-02     | 8.6E-03     | 1.5E-03     | 8.7E-03     | 4.7E-03     | 1.5E-02     |
| 3.1E-03     | 1.1E-02     | 2.0E-03     | 8.1E-03     | 7.4E-04     | 1.4E-02     | 6.8E-03     | 1.0E-02     | 5.3E-03     | 8.9E-03     | 7.8E-03     |
| 3.5E-02     | 9.0E-02     | 3.4E-02     | 6.6E-02     | 5.6E-02     | 1.2E-01     | 1.1E-01     | 5.0E-02     | 8.4E-02     | 1.5E-01     | 8.2E-02     |
| 3.0E-02     | 8.9E-02     | 3.3E-02     | 7.3E-02     | 4.2E-02     | 1.2E-01     | 9.6E-02     | 2.3E-02     | 8.4E-02     | 4.8E-02     | 8.7E-02     |
| 4.9E-02     | 1.7E-01     | 3.7E-02     | 8.2E-02     | 3.2E-02     | 2.1E-01     | 8.2E-02     | 8.1E-02     | 6.7E-02     | 9.6E-02     | 5.9E-02     |
| 0.0E+00     | 0.0E+00     | 1.6E+01     | 1.3E+01     | 0.0E+00     | 3.1E+00     | 0.0E+00     | 4.5E+00     | 4.8E+00     | 0.0E+00     | 0.0E+00     |
| 0           | 0           | 0           | 7           | 0           | 0           | 0           | 0           | 0           | 0           | 0           |
| 0           | 1           | 0           | 1           | 1           | 0           | 0           | 1           | 0           | 0           | 0           |
| 0           | 0           | 0           | 50          | 0           | 0           | 0           | 0           | 0           | 33          | 0           |
| 0           | 0           | 0           | 9           | 0           | 0           | 29          | 0           | 0           | 0           | 0           |
| 0           | 0           | 0           | 0           | 0           | 0           | 42          | 19          | 7           | 9           | 0           |
| 0           | 0           | 0           | 0           | 0           | 0           | 29          | 0           | 0           | 11          | 0           |
| 0           | 0           | 0           | 0           | 0           | 0           | 0           | 0           | 0           | 0           | 0           |
| 0           | 0           | 31          | 100         | 0           | 0           | 0           | 17          | 0           | 0           | 0           |
| 0           | 0           | 36          | 9           | 0           | 0           | 0           | 12          | 0           | 0           | 0           |
| 0           | 0           | 6           | 0           | 0           | 6           | 0           | 0           | 5           | 0           | 0           |
| 0           | 0           | 17          | 0           | 0           | 13          | 0           | 0           | 0           | 0           | 0           |
| 0           | 0           | 0           | 0           | 0           | 0           | 0           | 0           | 17          | 0           | 0           |
| 0           | 0           | 0           | 0           | 0           | 100         | 0           | 100         | 0           | 0           | 0           |
| 0           | 0           | 0           | 0           | 0           | 33          | 0           | 67          | 0           | 0           | 0           |
| 0           | 7           | 0           | 0           | 45          | 75          | 0           | 0           | 0           | 6           | 0           |
| 0           | 23          | 0           | 0           | 36          | 0           | 0           | 0           | 0           | 0           | 0           |
| 0           | 50          | 0           | 0           | 86          | 0           | 0           | 67          | 0           | 0           | 0           |
| 0           | 0           | 0           | 0           | 0           | 0           | 0           | 0           | 0           | 0           | 0           |
| 0           | 0           | 0           | 0           | 0           | 0           | 0           | 0           | 0           | 25          | 0           |
| 0           | 0           | 0           | 0           | 0           | 0           | 0           | 0           | 8           | 9           | 0           |
| 0           | 0           | 0           | 0           | 0           | 0           | 0           | 0           | 0           | 19          | 0           |
| 0           | 0           | 0           | 0           | 0           | 0           | 0           | 0           | 0           | 43          | 0           |
| 0           | 0           | 0           | 50          | 0           | 0           | 0           | 0           | 0           | 0           | 0           |
| 0           | 0           | 0           | 0           | 0           | 0           | 0           | 0           | 0           | 0           | 0           |
| 0           | 0           | 0           | 0           | 0           | 0           | 0           | 0           | 0           | 0           | 0           |
| 0           | 0           | 0           | 0           | 0           | 0           | 0           | 0           | 0           | 0           | 0           |
| 0           | 0           | 0           | 0           | 0           | 33          | 0           | 67          | 0           | 0           | 0           |
| 0           | 0           | 0           | 0           | 0           | 17          | 0           | 29          | 0           | 0           | 0           |
| 0           | 33          | 0           | 0           | 0           | 42          | 0           | 8           | 0           | 0           | 0           |
| 0           | 0           | 0           | 0           | 0           | 0           | 0           | 13          | 0           | 0           | 0           |
| 0           | 0           | 0           | 0           | 0           | 0           | 0           | 25          | 0           | 0           | 0           |
| 0           | 0           | 0           | 0           | 0           | 0           | 0           | 0           | 0           | 0           | 0           |
| 0           | 0           | 0           | 0           | 0           | 0           | 0           | 0           | 1           | 1           | 3           |
| 0           | 2           | 0           | 0           | 0           | 0           | 0           | 0           | 0           | 2           | 0           |
| 0           | 0           | 0           | 0           | 3           | 0           | 0           | 0           | 0           | 43          | 0           |
| 0           | 2           | 0           | 4           | 3           | 0           | 0           | 0           | 0           | 0           | 0           |
| 0           | 0           | 0           | 0           | 0           | 0           | 0           | 1           | 0           | 0           | 0           |
| 0           | 0           | 0           | 0           | 0           | 0           | 0           | 0           | 0           | 0           | 0           |
| 0           | 0           | 0           | 0           | 0           | 0           | 0           | 0           | 0           | 0           | 0           |
| 0           | 0           | 0           | 0           | 0           | 0           | 0           | 0           | 0           | 0           | 0           |
| 0           | 0           | 0           | 5           | 0           | 25          | 0           | 0           | 0           | 0           | 0           |
| 0           | 18          | 0           | 0           | 0           | 24          | 0           | 6           | 0           | 0           | 0           |
| 0           | 0           | 0           | 0           | 0           | 3           | 1           | 4           | 0           | 0           | 0           |
| 0           | 0           | 0           | 0           | 0           | 0           | 0           | 2           | 0           | 0           | 0           |
| 0           | 0           | 0           | 0           | 0           | 0           | 0           | 14          | 0           | 0           | 0           |
| 9.8E-02     | 9.3E-01     | 8.9E-02     | 6.2E-01     | 1.2E-01     | 1.2E+00     | 1.8E+00     | 6.3E-01     | 1.0E-01     | 1.1E-01     | 8.8E-02     |
| 1.5E-01     | 2.7E-01     | 1.6E-01     | 3.0E-01     | 3.3E-01     | 3.5E-01     | 2.1E-01     | 5.0E-01     | 3.3E-01     | 3.8E-01     | 6.6E-01     |
| 2           | 6           | 0           | 2           | 2           | 2           | 1           | 12          | 3           | 2           | 0           |
| -2.8E+00    | -6.5E-01    | 0.0E+00     | -2.0E-01    | 8.1E-01     | 4.3E-01     | 0.0E+00     | -4.4E+00    | 2.5E-01     | -4.5E-01    | 0.0E+00     |
| 0.0E+00     |

| Pseudo_Rare |
|-------------|-------------|-------------|-------------|-------------|-------------|-------------|-------------|-------------|-------------|-------------|
| At_F0298    | At_F0303    | At_F0307    | At_F0332    | At_F0345    | At_F0351    | At_F0367    | At_F0382    | At_F0394    | At_F0470    | At_F0487    |
| -           | -           | -           | -           | -           | -           | -           | -           | -           | -           | -           |
| 1.2E-02     | 1.5E-02     | 6.7E-03     | 2.7E-03     | 2.6E-03     | 9.9E-03     | 7.5E-03     | 6.1E-03     | 2.3E-03     | 8.6E-03     | 4.9E-03     |
| 1.3E-02     | 7.0E-03     | 8.9E-03     | 9.3E-04     | 1.7E-03     | 7.8E-03     | 1.8E-03     | 1.3E-02     | 2.2E-03     | 1.1E-02     | 3.2E-03     |
| 9.7E-03     | 1.1E-02     | 1.5E-02     | 3.7E-03     | 2.4E-03     | 1.4E-02     | 2.6E-03     | 1.0E-02     | 1.8E-03     | 3.4E-03     | 7.0E-03     |
| 2.0E-01     | 1.1E-01     | 1.3E-01     | 5.6E-02     | 8.2E-02     | 1.4E-01     | 1.0E-01     | 1.0E-01     | 3.4E-02     | 8.5E-02     | 6.9E-02     |
| 1.6E-01     | 7.4E-02     | 1.2E-01     | 3.3E-02     | 4.5E-02     | 1.7E-01     | 4.1E-02     | 7.3E-02     | 3.8E-02     | 1.1E-01     | 3.6E-02     |
| 1.5E-01     | 9.5E-02     | 2.1E-01     | 5.3E-02     | 3.5E-02     | 1.8E-01     | 3.5E-02     | 1.1E-01     | 2.3E-02     | 4.9E-02     | 6.9E-02     |
| 9.7E+00     | 0.0E+00     | 4.7E+01     | 0.0E+00     | 5.0E+00     | 5.0E+01     | 0.0E+00     | 0.0E+00     | 1.6E+00     | 2.0E+01     | 0.0E+00     |
| 0           | 0           | 74          | 0           | 0           | 50          | 0           | 0           | 0           | 5           | 0           |
| 0           | 0           | 13          | 0           | 0           | 11          | 1           | 1           | 1           | 0           | 0           |
| 100         | 0           | 0           | 0           | 0           | 0           | 0           | 0           | 0           | 0           | 0           |
| 100         | 0           | 14          | 10          | 0           | 25          | 0           | 0           | 0           | 0           | 0           |
| 0           | 0           | 15          | 8           | 6           | 18          | 0           | 0           | 0           | 0           | 0           |
| 0           | 0           | 0           | 0           | 0           | 38          | 0           | 0           | 0           | 0           | 0           |
| 0           | 0           | 100         | 0           | 0           | 100         | 0           | 0           | 0           | 0           | 0           |
| 0           | 0           | 100         | 0           | 0           | 100         | 0           | 0           | 0           | 0           | 0           |
| 7           | 0           | 100         | 0           | 0           | 64          | 0           | 0           | 0           | 18          | 0           |
| 25          | 0           | 0           | 0           | 0           | 27          | 0           | 0           | 0           | 0           | 0           |
| 9           | 0           | 36          | 11          | 0           | 55          | 0           | 0           | 0           | 45          | 0           |
| 0           | 0           | 100         | 0           | 40          | 100         | 0           | 0           | 17          | 60          | 0           |
| 0           | 0           | 100         | 0           | 0           | 100         | 0           | 0           | 0           | 0           | 0           |
| 0           | 0           | 58          | 0           | 0           | 45          | 0           | 0           | 0           | 0           | 0           |
| 0           | 0           | 0           | 0           | 0           | 69          | 0           | 0           | 18          | 38          | 0           |
| 50          | 0           | 0           | 0           | 0           | 50          | 0           | 60          | 56          | 0           | 0           |
| 50          | 0           | 0           | 0           | 63          | 100         | 0           | 0           | 67          | 60          | 0           |
| 0           | 0           | 50          | 0           | 0           | 0           | 0           | 0           | 0           | 0           | 0           |
| 0           | 0           | 43          | 0           | 0           | 33          | 0           | 0           | 0           | 0           | 0           |
| 0           | 0           | 0           | 0           | 0           | 0           | 0           | 0           | 0           | 0           | 0           |
| 0           | 0           | 0           | 0           | 0           | 0           | 0           | 0           | 0           | 0           | 0           |
| 0           | 0           | 60          | 0           | 0           | 33          | 0           | 0           | 0           | 0           | 0           |
| 0           | 0           | 50          | 0           | 0           | 75          | 0           | 0           | 0           | 0           | 0           |
| 0           | 0           | 58          | 0           | 0           | 0           | 0           | 0           | 0           | 0           | 0           |
| 0           | 0           | 28          | 0           | 0           | 0           | 0           | 0           | 0           | 0           | 0           |
| 0           | 0           | 38          | 0           | 0           | 50          | 0           | 0           | 0           | 11          | 0           |
| 0           | 0           | 80          | 0           | 0           | 0           | 0           | 0           | 0           | 0           | 0           |
| 0           | 0           | 100         | 0           | 0           | 40          | 0           | 0           | 0           | 0           | 0           |
| 0           | 0           | 38          | 0           | 0           | 44          | 0           | 0           | 0           | 0           | 0           |
| 0           | 0           | 6           | 0           | 0           | 5           | 0           | 0           | 0           | 0           | 0           |
| 0           | 0           | 0           | 0           | 0           | 28          | 0           | 60          | 0           | 0           | 0           |
| 0           | 0           | 0           | 0           | 0           | 92          | 0           | 100         | 0           | 0           | 0           |
| 0           | 0           | 4           | 0           | 0           | 0           | 0           | 0           | 0           | 0           | 0           |
| 0           | 0           | 0           | 0           | 0           | 0           | 0           | 0           | 0           | 2           | 0           |
| 0           | 0           | 0           | 0           | 0           | 0           | 1           | 0           | 1           | 0           | 0           |
| 0           | 0           | 0           | 0           | 0           | 2           | 0           | 0           | 0           | 0           | 0           |
| 0           | 0           | 15          | 0           | 0           | 0           | 0           | 0           | 0           | 0           | 0           |
| 0           | 0           | 5           | 0           | 0           | 18          | 2           | 0           | 0           | 0           | 0           |
| 0           | 0           | 15          | 0           | 0           | 6           | 0           | 0           | 0           | 10          | 0           |
| 0           | 0           | 5           | 0           | 0           | 4           | 0           | 0           | 0           | 0           | 0           |
| 0           | 0           | 8           | 0           | 0           | 6           | 0           | 0           | 0           | 0           | 0           |
| 0           | 0           | 6           | 0           | 0           | 0           | 0           | 5           | 5           | 0           | 0           |
| 0           | 0           | 14          | 0           | 0           | 4           | 0           | 0           | 0           | 3           | 0           |
| 0           | 0           | 33          | 0           | 0           | 3           | 0           | 0           | 0           | 0           | 0           |
| 0           | 0           | 4           | 0           | 0           | 0           | 0           | 0           | 1           | 0           | 0           |
| 0           | 0           | 0           | 0           | 0           | 2           | 0           | 8           | 0           | 2           | 0           |
| 0           | 0           | 0           | 0           | 0           | 10          | 0           | 48          | 0           | 3           | 0           |
| 1.6E+00     | 7.7E-02     | 5.0E-01     | 8.1E-02     | 5.5E-01     | 3.6E-01     | 8.3E-02     | 4.4E-01     | 6.6E-02     | 1.6E-01     | 7.0E-02     |
| 3.2E-01     | 3.1E-01     | 1.3E-01     | 2.6E-01     | 6.0E-01     | 1.4E-01     | 1.5E-01     | 3.3E-01     | 3.0E-01     | 2.8E-01     | 1.4E-01     |
| 1           | 0           | 0           | 2           | 4           | 0           | 2           | 2           | 2           | 0           | 2           |
| 0.0E+00     | 0.0E+00     | 0.0E+00     | -5.0E-01    | 0.0E+00     | 0.0E+00     | -1.6E+00    | -2.1E+00    | -7.6E-01    | 0.0E+00     | 6.3E-01     |
| 0.0E+00     |

| Pseudo_Rare |
|-------------|-------------|-------------|-------------|-------------|-------------|-------------|-------------|-------------|-------------|-------------|-------------|
| At_F0493    | At_F0497    | At_F0511    | At_F0537    | At_F0540    | At_F0637    | At_F0639    | At_F0655    | At_F0685    | At_F0692    | Atesg0019   |             |
| -           | -           | -           | -           | -           | -           | -           | -           | -           | -           | NA          |             |
| 1.2E-02     | 1.2E-02     | 2.2E-03     | 6.5E-03     | 3.8E-03     | 1.4E-02     | 8.9E-03     | 4.0E-03     | 5.7E-03     | 1.1E-02     | 3.5E-03     |             |
| 7.2E-03     | 1.4E-02     | 2.3E-03     | 8.8E-03     | 2.8E-03     | 5.1E-03     | 1.2E-02     | 8.4E-03     | 1.2E-02     | 6.2E-03     | 2.6E-03     |             |
| 3.4E-03     | 3.8E-03     | 1.1E-03     | 1.5E-02     | 2.0E-03     | 3.0E-03     | 1.3E-02     | 3.3E-03     | 4.7E-03     | 6.8E-03     | 3.4E-03     |             |
| 1.7E-01     | 1.0E-01     | 3.9E-02     | 9.2E-02     | 4.3E-02     | 1.0E-01     | 9.8E-02     | 9.5E-02     | 3.9E-02     | 6.4E-02     | 6.0E-02     |             |
| 8.7E-02     | 1.1E-01     | 6.5E-02     | 7.2E-02     | 3.6E-02     | 5.9E-02     | 1.1E-01     | 7.9E-02     | 6.3E-02     | 7.0E-02     | 6.0E-02     |             |
| 1.3E-01     | 6.5E-02     | 2.6E-02     | 1.6E-01     | 6.1E-02     | 8.2E-02     | 1.1E-01     | 2.3E-02     | 5.4E-02     | 5.4E-02     | 5.7E-02     |             |
| 0.0E+00     | 1.5E+00     | 1.9E+01     | 0.0E+00     | 0.0E+00     | 0.0E+00     | 0.0E+00     | 6.5E+00     | 9.5E+00     | 3.5E+01     | 0.0E+00     |             |
| 0           | 0           | 0           | 0           | 0           | 0           | 0           | 0           | 4           | 27          | 0           |             |
| 1           | 0           | 0           | 0           | 0           | 0           | 0           | 0           | 1           | 2           | 0           |             |
| 83          | 0           | 50          | 0           | 0           | 0           | 0           | 0           | 0           | 0           | 0           |             |
| 78          | 0           | 0           | 0           | 0           | 0           | 0           | 0           | 0           | 0           | 0           |             |
| 0           | 0           | 9           | 0           | 0           | 0           | 0           | 9           | 0           | 0           | 0           |             |
| 0           | 0           | 12          | 9           | 0           | 0           | 0           | 11          | 0           | 0           | 0           |             |
| 0           | 0           | 50          | 0           | 0           | 0           | 0           | 86          | 0           | 0           | 0           |             |
| 0           | 0           | 50          | 0           | 0           | 0           | 0           | 75          | 0           | 0           | 0           |             |
| 0           | 0           | 22          | 0           | 0           | 0           | 0           | 0           | 25          | 0           | 0           |             |
| 0           | 5           | 7           | 0           | 0           | 0           | 0           | 0           | 13          | 35          | 0           |             |
| 0           | 0           | 36          | 0           | 0           | 0           | 0           | 0           | 0           | 56          | 0           |             |
| 0           | 14          | 20          | 0           | 0           | 0           | 0           | 0           | 0           | 100         | 0           |             |
| 0           | 0           | 0           | 0           | 0           | 0           | 0           | 0           | 0           | 100         | 0           |             |
| 0           | 0           | 0           | 78          | 0           | 0           | 0           | 0           | 0           | 0           | 0           |             |
| 0           | 0           | 0           | 29          | 0           | 0           | 0           | 0           | 0           | 0           | 0           |             |
| 20          | 0           | 50          | 25          | 0           | 0           | 0           | 21          | 0           | 0           | 0           |             |
| 67          | 0           | 50          | 100         | 0           | 0           | 0           | 20          | 11          | 0           | 0           |             |
| 33          | 0           | 0           | 0           | 0           | 0           | 0           | 0           | 0           | 0           | 0           |             |
| 75          | 0           | 0           | 0           | 0           | 0           | 0           | 0           | 0           | 0           | 0           |             |
| 0           | 0           | 0           | 0           | 0           | 0           | 0           | 14          | 0           | 0           | 0           |             |
| 0           | 10          | 0           | 0           | 0           | 0           | 0           | 20          | 0           | 0           | 0           |             |
| 0           | 0           | 0           | 0           | 0           | 0           | 0           | 25          | 14          | 0           | 0           |             |
| 0           | 0           | 0           | 0           | 0           | 0           | 0           | 0           | 10          | 0           | 0           |             |
| 0           | 0           | 0           | 0           | 0           | 0           | 0           | 0           | 0           | 0           | 0           |             |
| 4           | 0           | 0           | 0           | 0           | 0           | 0           | 0           | 0           | 0           | 0           |             |
| 0           | 0           | 0           | 0           | 0           | 0           | 0           | 0           | 0           | 22          | 0           |             |
| 0           | 0           | 0           | 0           | 0           | 0           | 0           | 0           | 0           | 40          | 0           |             |
| 0           | 0           | 0           | 0           | 0           | 0           | 0           | 0           | 0           | 0           | 0           |             |
| 0           | 0           | 0           | 0           | 0           | 0           | 0           | 0           | 0           | 0           | 10          |             |
| 0           | 0           | 0           | 50          | 0           | 0           | 0           | 0           | 0           | 0           | 0           |             |
| 0           | 0           | 0           | 0           | 0           | 0           | 0           | 0           | 0           | 0           | 0           |             |
| 0           | 0           | 0           | 50          | 0           | 0           | 0           | 0           | 0           | 0           | 0           |             |
| 19          | 0           | 0           | 0           | 0           | 0           | 0           | 0           | 0           | 0           | 0           |             |
| 0           | 0           | 0           | 0           | 0           | 0           | 0           | 0           | 0           | 0           | 0           |             |
| 0           | 0           | 0           | 0           | 0           | 0           | 0           | 0           | 0           | 0           | 0           |             |
| 0           | 0           | 0           | 4           | 0           | 0           | 0           | 2           | 0           | 0           | 0           |             |
| 3           | 0           | 0           | 0           | 0           | 0           | 0           | 12          | 0           | 0           | 0           |             |
| 2           | 0           | 0           | 0           | 0           | 0           | 0           | 0           | 0           | 0           | 0           |             |
| 0           | 0           | 0           | 0           | 0           | 0           | 0           | 0           | 0           | 0           | 0           |             |
| 0           | 0           | 0           | 0           | 0           | 0           | 0           | 0           | 1           | 0           | 0           |             |
| 0           | 0           | 0           | 0           | 0           | 0           | 0           | 0           | 0           | 2           | 0           |             |
| 0           | 0           | 0           | 0           | 0           | 0           | 0           | 0           | 0           | 4           | 0           |             |
| 0           | 0           | 0           | 0           | 0           | 0           | 0           | 0           | 0           | 0           | 4           |             |
| 2           | 0           | 0           | 3           | 2           | 2           | 0           | 0           | 0           | 0           | 0           |             |
| 0           | 0           | 0           | 13          | 0           | 0           | 0           | 0           | 0           | 0           | 1           |             |
| 0           | 0           | 0           | 9           | 0           | 0           | 0           | 0           | 0           | 0           | 0           |             |
| 0           | 0           | 0           | 36          | 0           | 0           | 0           | 0           | 3           | 0           | 0           |             |
| 5.3E-01     | 1.2E+00     | 1.4E-01     | 9.8E-02     | 1.8E-01     | 9.5E-02     | 5.1E-01     | 1.1E-01     | 7.9E-02     | 1.3E+00     | 1.2E-01     |             |
| 2.2E-01     | 1.4E-01     | 1.3E-01     | 9.6E-02     | 3.3E-01     | 2.2E-01     | 3.9E-01     | 4.7E-01     | 3.3E-01     | 2.2E-01     | 6.0E-01     |             |
| 2           | 2           | 0           | 0           | 0           | 0           | 2           | 2           | 0           | 2           | 2           |             |
| -2.2E-02    | -6.0E-03    | 0.0E+00     | 0.0E+00     | 0.0E+00     | 0.0E+00     | 3.3E-02     | 5.6E-01     | 0.0E+00     | -9.3E-01    | 4.5E-01     |             |
| 0.0E+00     |             |

| Pseudo_Rare |
|-------------|-------------|-------------|-------------|-------------|-------------|-------------|-------------|-------------|-------------|-------------|
| Atesg0021   | Atesg0055   | Atesg0064   | Atesg0076   | Atesg0117   | Atesg0142   | Atesg0147   | Atesg0164   | Atpsg0001   | Atpsg0007   | Atpsg0009   |
| NA          |
| 5.1E-03     | 6.7E-03     | 4.2E-03     | 1.2E-02     | 2.8E-03     | 7.0E-03     | 7.2E-03     | 8.2E-03     | 2.1E-03     | 9.2E-03     | 1.5E-03     |
| 6.2E-03     | 8.0E-03     | 4.7E-03     | 1.7E-02     | 1.1E-02     | 1.8E-03     | 1.9E-03     | 1.4E-02     | 3.6E-03     | 6.5E-03     | 2.6E-03     |
| 7.5E-03     | 5.3E-03     | 3.1E-03     | 4.0E-03     | 8.0E-03     | 3.0E-03     | 5.7E-03     | 9.0E-03     | 4.7E-03     | 6.3E-03     | 4.9E-03     |
| 8.3E-02     | 7.2E-02     | 7.9E-02     | 1.4E-01     | 5.1E-02     | 1.2E-01     | 7.2E-02     | 1.3E-01     | 5.8E-02     | 1.4E-01     | 6.2E-02     |
| 7.6E-02     | 1.1E-01     | 7.5E-02     | 1.4E-01     | 1.7E-01     | 7.0E-02     | 4.6E-02     | 1.9E-01     | 4.5E-02     | 8.2E-02     | 8.0E-02     |
| 7.6E-02     | 1.4E-01     | 8.0E-02     | 6.9E-02     | 1.0E-01     | 4.6E-02     | 8.1E-02     | 9.1E-02     | 5.4E-02     | 7.7E-02     | 6.0E-02     |
| 6.3E+00     | 5.0E+01     | 2.2E+01     | 0.0E+00     | 3.7E+01     | 0.0E+00     | 8.8E+00     | 5.0E+01     | 6.1E+00     | 3.9E+00     | 0.0E+00     |
| 0           | 70          | 31          | 0           | 75          | 0           | 0           | 89          | 0           | 0           | 0           |
| 0           | 13          | 8           | 0           | 4           | 0           | 0           | 40          | 0           | 1           | 0           |
| 0           | 100         | 0           | 0           | 0           | 0           | 0           | 0           | 25          | 0           | 0           |
| 0           | 44          | 44          | 0           | 0           | 0           | 0           | 0           | 0           | 0           | 0           |
| 0           | 24          | 37          | 0           | 0           | 0           | 0           | 11          | 0           | 0           | 0           |
| 0           | 50          | 55          | 0           | 0           | 0           | 0           | 60          | 0           | 9           | 0           |
| 0           | 100         | 40          | 0           | 0           | 0           | 0           | 100         | 0           | 33          | 0           |
| 0           | 100         | 92          | 0           | 0           | 0           | 0           | 100         | 67          | 0           | 0           |
| 0           | 33          | 20          | 0           | 20          | 0           | 0           | 0           | 0           | 0           | 0           |
| 7           | 27          | 0           | 0           | 33          | 0           | 0           | 20          | 0           | 0           | 0           |
| 30          | 44          | 8           | 0           | 50          | 0           | 18          | 50          | 0           | 0           | 0           |
| 0           | 100         | 15          | 0           | 50          | 0           | 50          | 100         | 0           | 43          | 0           |
| 0           | 0           | 0           | 0           | 100         | 0           | 0           | 22          | 0           | 0           | 0           |
| 0           | 63          | 0           | 0           | 62          | 0           | 0           | 0           | 0           | 0           | 0           |
| 0           | 33          | 0           | 0           | 50          | 0           | 0           | 0           | 0           | 0           | 0           |
| 0           | 17          | 0           | 0           | 0           | 0           | 0           | 0           | 0           | 0           | 0           |
| 0           | 0           | 100         | 56          | 0           | 0           | 0           | 0           | 0           | 0           | 0           |
| 0           | 33          | 100         | 0           | 0           | 0           | 0           | 0           | 0           | 0           | 0           |
| 0           | 56          | 18          | 0           | 0           | 0           | 0           | 0           | 0           | 0           | 0           |
| 0           | 22          | 13          | 0           | 0           | 0           | 0           | 6           | 0           | 0           | 0           |
| 0           | 33          | 40          | 0           | 0           | 0           | 0           | 29          | 0           | 0           | 0           |
| 0           | 100         | 60          | 0           | 0           | 0           | 0           | 89          | 0           | 0           | 0           |
| 0           | 60          | 50          | 0           | 0           | 0           | 0           | 100         | 0           | 0           | 0           |
| 0           | 33          | 24          | 0           | 50          | 0           | 0           | 33          | 0           | 0           | 0           |
| 0           | 36          | 0           | 0           | 0           | 0           | 0           | 33          | 0           | 0           | 0           |
| 0           | 33          | 0           | 0           | 80          | 0           | 0           | 25          | 0           | 0           | 0           |
| 0           | 100         | 11          | 0           | 100         | 0           | 0           | 100         | 0           | 0           | 0           |
| 0           | 100         | 100         | 0           | 50          | 0           | 0           | 0           | 0           | 0           | 0           |
| 0           | 33          | 0           | 0           | 67          | 0           | 0           | 0           | 0           | 0           | 0           |
| 0           | 13          | 0           | 0           | 0           | 0           | 0           | 0           | 0           | 0           | 0           |
| 0           | 0           | 0           | 0           | 0           | 0           | 0           | 0           | 0           | 0           | 0           |
| 0           | 33          | 100         | 0           | 0           | 0           | 0           | 0           | 0           | 0           | 0           |
| 0           | 28          | 0           | 0           | 0           | 0           | 0           | 3           | 0           | 0           | 0           |
| 3           | 11          | 10          | 0           | 0           | 0           | 0           | 0           | 0           | 0           | 0           |
| 0           | 0           | 3           | 0           | 0           | 0           | 0           | 1           | 0           | 2           | 0           |
| 0           | 5           | 14          | 0           | 0           | 0           | 0           | 34          | 0           | 0           | 0           |
| 0           | 0           | 10          | 0           | 0           | 0           | 0           | 32          | 0           | 0           | 0           |
| 0           | 26          | 14          | 0           | 0           | 0           | 0           | 100         | 0           | 0           | 0           |
| 0           | 16          | 7           | 0           | 0           | 0           | 0           | 0           | 0           | 0           | 0           |
| 0           | 0           | 0           | 0           | 0           | 0           | 0           | 18          | 0           | 2           | 0           |
| 0           | 4           | 2           | 0           | 17          | 0           | 0           | 11          | 0           | 0           | 0           |
| 0           | 0           | 0           | 0           | 0           | 0           | 0           | 0           | 0           | 0           | 0           |
| 6           | 6           | 18          | 0           | 12          | 0           | 0           | 0           | 0           | 0           | 0           |
| 0           | 4           | 0           | 0           | 18          | 0           | 0           | 0           | 0           | 0           | 0           |
| 0           | 2           | 0           | 0           | 2           | 0           | 0           | 0           | 0           | 0           | 0           |
| 0           | 7           | 0           | 0           | 0           | 0           | 0           | 0           | 0           | 0           | 4           |
| 4           | 7           | 24          | 5           | 0           | 0           | 0           | 0           | 4           | 0           | 0           |
| 5.3E-01     | 1.8E+00     | 7.5E-01     | 5.7E-01     | 1.1E-01     | 0.0E+00     | 1.4E-01     | 1.7E-01     | 3.3E-01     | 8.2E-02     | 1.7E-01     |
| 1.0E-01     | 9.0E-02     | 2.2E-01     | 2.4E-01     | 2.9E-01     | 6.4E-02     | 2.2E-01     | 2.3E-01     | 1.4E+00     | 3.3E-01     | 3.9E-01     |
| 3           | 2           | 0           | 0           | 0           | 0           | 2           | 0           | 0           | 2           | 0           |
| -5.4E-01    | 2.7E-01     | 0.0E+00     | 0.0E+00     | 0.0E+00     | 0.0E+00     | 7.8E-01     | 0.0E+00     | 0.0E+00     | 9.2E-02     | 0.0E+00     |
| 0.0E+00     |

| Pseudo_Rare |
|-------------|-------------|-------------|-------------|-------------|-------------|-------------|-------------|-------------|-------------|-------------|
| Atpsg0012   | Atpsg0015   | Atpsg0033   | Atpsg0034   | Atpsg0048   | Atpsg0049   | Atpsg0050   | Atpsg0052   | Atpsg0053   | Atpsg0054   | Atpsg0056   |
| NA          |
| 3.5E-03     | 5.9E-03     | 7.6E-03     | 7.8E-03     | 2.3E-03     | 9.6E-03     | 1.3E-02     | 1.5E-02     | 9.5E-03     | 7.7E-03     | 3.9E-03     |
| 4.2E-03     | 9.2E-03     | 6.5E-03     | 1.4E-03     | 7.6E-03     | 7.3E-03     | 1.0E-02     | 1.6E-02     | 3.1E-03     | 5.0E-03     | 4.7E-03     |
| 6.8E-03     | 2.5E-04     | 1.6E-02     | 1.2E-02     | 5.5E-03     | 8.7E-03     | 6.8E-03     | 1.5E-02     | 1.1E-02     | 5.5E-03     | 3.0E-03     |
| 7.9E-02     | 5.5E-02     | 1.0E-01     | 7.8E-02     | 4.0E-02     | 1.6E-01     | 8.4E-02     | 1.1E-01     | 5.1E-02     | 8.0E-02     | 6.3E-02     |
| 8.5E-02     | 1.1E-01     | 7.4E-02     | 4.8E-02     | 1.1E-01     | 1.3E-01     | 9.0E-02     | 1.0E-01     | 3.8E-02     | 4.4E-02     | 4.4E-02     |
| 8.0E-02     | 5.0E-03     | 1.3E-01     | 1.1E-01     | 1.1E-01     | 1.3E-01     | 6.7E-02     | 1.1E-01     | 8.1E-02     | 6.2E-02     | 5.7E-02     |
| 2.4E+00     | 4.2E+01     | 0.0E+00     | 3.6E+01     | 3.4E+01     | 1.3E+01     | 0.0E+00     | 0.0E+00     | 0.0E+00     | 0.0E+00     | 2.8E+00     |
| 0           | 71          | 0           | 80          | 58          | 67          | 0           | 0           | 0           | 0           | 0           |
| 0           | 20          | 1           | 3           | 6           | 3           | 0           | 0           | 0           | 0           | 0           |
| 0           | 0           | 0           | 0           | 75          | 0           | 0           | 0           | 0           | 0           | 0           |
| 0           | 0           | 0           | 43          | 0           | 0           | 0           | 0           | 0           | 0           | 0           |
| 0           | 0           | 0           | 33          | 0           | 0           | 0           | 0           | 0           | 0           | 0           |
| 0           | 0           | 0           | 0           | 0           | 0           | 0           | 0           | 0           | 0           | 0           |
| 0           | 0           | 0           | 100         | 0           | 57          | 0           | 0           | 0           | 0           | 0           |
| 20          | 50          | 0           | 100         | 25          | 0           | 0           | 0           | 0           | 0           | 0           |
| 0           | 60          | 0           | 14          | 27          | 0           | 0           | 0           | 0           | 0           | 0           |
| 0           | 17          | 0           | 75          | 56          | 0           | 0           | 0           | 0           | 0           | 0           |
| 0           | 50          | 0           | 50          | 50          | 50          | 0           | 0           | 0           | 0           | 0           |
| 0           | 100         | 0           | 100         | 100         | 0           | 0           | 0           | 0           | 0           | 100         |
| 0           | 0           | 0           | 67          | 100         | 100         | 0           | 0           | 0           | 0           | 71          |
| 0           | 0           | 0           | 60          | 24          | 50          | 50          | 0           | 0           | 0           | 3           |
| 0           | 4           | 0           | 0           | 41          | 45          | 0           | 0           | 0           | 0           | 25          |
| 0           | 6           | 0           | 0           | 60          | 83          | 20          | 0           | 0           | 0           | 33          |
| 0           | 0           | 0           | 0           | 100         | 100         | 75          | 0           | 0           | 0           | 0           |
| 0           | 0           | 0           | 0           | 0           | 0           | 0           | 0           | 0           | 0           | 0           |
| 0           | 8           | 0           | 38          | 0           | 40          | 0           | 0           | 0           | 0           | 0           |
| 0           | 0           | 0           | 25          | 0           | 0           | 0           | 0           | 0           | 0           | 0           |
| 0           | 0           | 0           | 0           | 0           | 20          | 0           | 0           | 0           | 0           | 0           |
| 0           | 17          | 0           | 40          | 0           | 83          | 0           | 0           | 0           | 0           | 0           |
| 0           | 0           | 0           | 100         | 0           | 100         | 0           | 0           | 0           | 0           | 0           |
| 0           | 10          | 0           | 14          | 0           | 0           | 0           | 0           | 0           | 0           | 0           |
| 0           | 39          | 0           | 50          | 22          | 0           | 0           | 0           | 0           | 0           | 0           |
| 0           | 36          | 0           | 75          | 40          | 50          | 0           | 0           | 0           | 0           | 0           |
| 0           | 100         | 0           | 0           | 75          | 0           | 0           | 0           | 0           | 0           | 0           |
| 0           | 33          | 0           | 0           | 86          | 86          | 0           | 0           | 0           | 0           | 0           |
| 0           | 0           | 0           | 25          | 14          | 40          | 0           | 0           | 0           | 0           | 0           |
| 0           | 0           | 0           | 0           | 50          | 27          | 0           | 0           | 0           | 0           | 0           |
| 0           | 8           | 0           | 0           | 0           | 18          | 0           | 0           | 0           | 0           | 43          |
| 0           | 0           | 0           | 0           | 67          | 83          | 0           | 0           | 0           | 0           | 0           |
| 0           | 0           | 3           | 0           | 0           | 0           | 0           | 19          | 0           | 0           | 0           |
| 0           | 4           | 0           | 8           | 0           | 0           | 0           | 3           | 0           | 0           | 0           |
| 0           | 0           | 0           | 6           | 0           | 0           | 0           | 0           | 0           | 0           | 0           |
| 0           | 0           | 0           | 0           | 6           | 0           | 0           | 0           | 0           | 0           | 0           |
| 0           | 0           | 0           | 42          | 0           | 3           | 0           | 0           | 0           | 0           | 0           |
| 0           | 27          | 0           | 0           | 0           | 0           | 0           | 0           | 0           | 0           | 0           |
| 0           | 11          | 2           | 0           | 4           | 0           | 0           | 0           | 0           | 0           | 0           |
| 0           | 10          | 0           | 4           | 0           | 0           | 0           | 0           | 0           | 0           | 0           |
| 0           | 4           | 0           | 3           | 3           | 0           | 0           | 0           | 0           | 0           | 0           |
| 0           | 11          | 0           | 0           | 14          | 13          | 0           | 0           | 0           | 0           | 0           |
| 0           | 3           | 0           | 0           | 26          | 7           | 0           | 0           | 0           | 0           | 0           |
| 0           | 0           | 0           | 3           | 11          | 4           | 0           | 1           | 0           | 0           | 0           |
| 0           | 0           | 0           | 0           | 3           | 1           | 0           | 0           | 0           | 0           | 0           |
| 0           | 5           | 0           | 0           | 5           | 4           | 0           | 0           | 0           | 0           | 0           |
| 0           | 0           | 0           | 0           | 22          | 9           | 0           | 0           | 0           | 0           | 0           |
| 4.8E-01     | 3.6E-01     | 1.5E-01     | 8.2E-02     | 5.4E-02     | 3.5E-01     | 9.8E-01     | 1.4E-01     | 7.1E-02     | 5.5E-02     | 3.8E-01     |
| 3.4E-01     | 1.8E-01     | 6.7E-01     | 2.7E-01     | 2.6E-01     | 3.3E-01     | 5.7E-01     | 3.1E-01     | 3.6E-01     | 2.0E-01     | 6.2E-01     |
| 2           | 0           | 0           | 0           | 0           | 0           | 0           | 2           | 0           | 0           | 0           |
| -3.3E-01    | 0.0E+00     |
| 0.0E+00     |

| Pseudo_Rare |
|-------------|-------------|-------------|-------------|-------------|-------------|-------------|-------------|-------------|-------------|-------------|-------------|
| Atpsg0057   | Atpsg0060   | Atpsg0065   | Atpsg0068   | Atpsg0069   | Atpsg0070   | Atpsg0071   | Atpsg0073   | Atpsg0085   | Atpsg0089   | Atpsg0100   |             |
| NA          |             |
| 5.1E-03     | 2.7E-03     | 6.4E-03     | 9.0E-03     | 3.6E-03     | 5.6E-03     | 1.6E-02     | 3.5E-03     | 2.4E-03     | 3.0E-03     | 2.6E-03     |             |
| 3.2E-03     | 1.4E-03     | 6.0E-03     | 4.9E-03     | 3.7E-03     | 1.2E-02     | 1.1E-02     | 4.1E-03     | 7.4E-03     | 1.0E-03     | 3.3E-03     |             |
| 4.1E-03     | 2.7E-03     | 6.5E-03     | 9.9E-03     | 6.7E-03     | 3.0E-03     | 1.9E-03     | 3.0E-03     | 8.1E-03     | 1.9E-03     | 2.7E-03     |             |
| 4.3E-02     | 4.6E-02     | 1.7E-01     | 1.0E-01     | 8.9E-02     | 9.8E-02     | 1.1E-01     | 6.4E-02     | 6.3E-02     | 6.1E-02     | 4.7E-02     |             |
| 7.1E-02     | 6.1E-02     | 1.4E-01     | 7.6E-02     | 1.1E-01     | 1.4E-01     | 6.0E-02     | 3.9E-02     | 5.6E-02     | 4.0E-02     | 4.9E-02     |             |
| 5.1E-02     | 9.1E-02     | 1.4E-01     | 1.5E-01     | 9.1E-02     | 4.0E-02     | 3.6E-02     | 3.7E-02     | 4.8E-02     | 4.5E-02     | 3.9E-02     |             |
| 1.4E+00     | 0.0E+00     | 4.6E+01     | 1.9E+01     | 8.5E+00     | 4.6E+01     | 2.1E+01     | 6.7E+00     | 2.4E+00     | 0.0E+00     | 5.0E+00     |             |
| 0           | 0           | 59          | 25          | 22          | 66          | 18          | 0           | 0           | 0           | 0           |             |
| 0           | 0           | 6           | 0           | 1           | 7           | 2           | 0           | 0           | 0           | 0           |             |
| 0           | 0           | 100         | 0           | 0           | 0           | 100         | 0           | 0           | 0           | 0           |             |
| 0           | 0           | 54          | 0           | 0           | 88          | 75          | 0           | 0           | 0           | 0           |             |
| 0           | 0           | 43          | 0           | 0           | 10          | 21          | 25          | 20          | 0           | 0           |             |
| 0           | 0           | 50          | 17          | 0           | 44          | 64          | 0           | 0           | 0           | 0           |             |
| 0           | 0           | 100         | 40          | 100         | 100         | 75          | 0           | 0           | 0           | 0           |             |
| 0           | 0           | 100         | 38          | 33          | 100         | 100         | 0           | 0           | 0           | 17          |             |
| 7           | 0           | 54          | 50          | 0           | 31          | 14          | 25          | 0           | 0           | 0           |             |
| 0           | 0           | 38          | 33          | 0           | 39          | 0           | 0           | 0           | 0           | 0           |             |
| 0           | 0           | 60          | 0           | 0           | 47          | 0           | 0           | 13          | 0           | 0           |             |
| 0           | 0           | 100         | 50          | 0           | 75          | 0           | 0           | 0           | 0           | 22          |             |
| 0           | 0           | 100         | 100         | 0           | 100         | 0           | 0           | 33          | 0           | 0           |             |
| 0           | 0           | 67          | 25          | 0           | 33          | 0           | 0           | 0           | 0           | 0           |             |
| 0           | 0           | 20          | 38          | 0           | 10          | 0           | 0           | 0           | 0           | 0           |             |
| 0           | 0           | 38          | 0           | 0           | 7           | 0           | 0           | 0           | 14          | 0           |             |
| 0           | 0           | 80          | 0           | 0           | 43          | 0           | 0           | 0           | 100         | 0           |             |
| 0           | 0           | 100         | 0           | 0           | 25          | 100         | 0           | 100         | 0           | 0           |             |
| 0           | 0           | 22          | 0           | 0           | 21          | 40          | 0           | 0           | 0           | 0           |             |
| 0           | 0           | 21          | 0           | 0           | 37          | 20          | 0           | 0           | 0           | 0           |             |
| 0           | 0           | 44          | 0           | 0           | 45          | 38          | 0           | 0           | 0           | 13          |             |
| 0           | 0           | 0           | 0           | 25          | 100         | 25          | 0           | 0           | 0           | 0           |             |
| 0           | 0           | 100         | 0           | 40          | 67          | 100         | 0           | 0           | 0           | 0           |             |
| 0           | 0           | 33          | 11          | 0           | 48          | 14          | 0           | 0           | 0           | 0           |             |
| 0           | 0           | 20          | 21          | 0           | 21          | 0           | 0           | 0           | 0           | 0           |             |
| 0           | 0           | 36          | 25          | 0           | 26          | 0           | 0           | 0           | 0           | 0           |             |
| 0           | 0           | 50          | 50          | 0           | 50          | 0           | 0           | 0           | 0           | 0           |             |
| 0           | 0           | 100         | 78          | 0           | 0           | 0           | 0           | 0           | 0           | 0           |             |
| 0           | 0           | 43          | 41          | 0           | 27          | 0           | 0           | 0           | 0           | 0           |             |
| 0           | 0           | 25          | 31          | 0           | 5           | 0           | 0           | 0           | 0           | 0           |             |
| 0           | 0           | 40          | 0           | 0           | 7           | 0           | 11          | 0           | 0           | 0           |             |
| 0           | 0           | 33          | 0           | 0           | 25          | 0           | 0           | 0           | 100         | 0           |             |
| 0           | 0           | 0           | 0           | 0           | 7           | 25          | 0           | 50          | 5           | 0           |             |
| 0           | 0           | 2           | 0           | 0           | 2           | 6           | 0           | 0           | 0           | 0           |             |
| 0           | 0           | 5           | 0           | 0           | 2           | 0           | 0           | 7           | 0           | 0           |             |
| 0           | 0           | 0           | 0           | 0           | 3           | 1           | 0           | 0           | 0           | 0           |             |
| 0           | 0           | 0           | 0           | 0           | 11          | 3           | 0           | 0           | 0           | 4           |             |
| 0           | 0           | 9           | 0           | 1           | 6           | 3           | 0           | 0           | 0           | 0           |             |
| 0           | 0           | 0           | 0           | 0           | 3           | 2           | 0           | 0           | 0           | 0           |             |
| 0           | 0           | 5           | 4           | 0           | 7           | 0           | 0           | 0           | 0           | 0           |             |
| 0           | 0           | 2           | 2           | 0           | 1           | 0           | 0           | 0           | 0           | 0           |             |
| 0           | 0           | 0           | 0           | 0           | 4           | 0           | 0           | 0           | 0           | 0           |             |
| 4           | 0           | 3           | 5           | 0           | 0           | 0           | 0           | 0           | 0           | 0           |             |
| 0           | 0           | 5           | 8           | 0           | 0           | 0           | 0           | 2           | 0           | 2           |             |
| 0           | 0           | 1           | 7           | 0           | 0           | 0           | 0           | 0           | 0           | 0           |             |
| 0           | 0           | 0           | 0           | 0           | 2           | 0           | 0           | 0           | 0           | 2           |             |
| 0           | 0           | 0           | 0           | 0           | 4           | 0           | 0           | 0           | 31          | 0           |             |
| 3.0E+00     | 9.7E-02     | 2.4E-01     | 1.7E-01     | 9.7E-01     | 4.4E-01     | 2.1E-01     | 9.8E-02     | 3.9E-02     | 1.3E-01     | 2.2E-01     |             |
| 2.3E-01     | 2.3E-01     | 4.5E-01     | 3.2E-01     | 2.1E-01     | 5.4E-01     | 1.9E-01     | 3.5E-01     | 3.3E-01     | 7.2E-01     | 4.4E-01     |             |
| 2           | 0           | 0           | 0           | 1           | 2           | 5           | 0           | 1           | 0           | 1           |             |
| 0.0E+00     | 0.0E+00     | 0.0E+00     | 0.0E+00     | 0.0E+00     | -1.1E-01    | -1.9E+00    | 0.0E+00     | 0.0E+00     | 0.0E+00     | 0.0E+00     |             |
| 0.0E+00     |             |

| Pseudo_Rare |
|-------------|-------------|-------------|-------------|-------------|-------------|-------------|-------------|-------------|-------------|-------------|
| Atpsg0102   | Atpsg0103   | Atpsg0105   | Atpsg0107   | Atpsg0121   | Atpsg0122   | Atpsg0124   | Atpsg0131   | Atpsg0135   | Atpsg0136   | Atpsg0138   |
| NA          |
| 7.0E-03     | 5.6E-03     | 1.4E-02     | 4.9E-03     | 5.5E-03     | 1.9E-03     | 2.2E-03     | 9.2E-03     | 4.2E-03     | 1.3E-02     | 1.1E-03     |
| 4.7E-03     | 1.0E-02     | 2.0E-02     | 3.6E-03     | 7.0E-03     | 1.6E-03     | 4.2E-03     | 9.5E-03     | 4.6E-03     | 9.3E-03     | 3.0E-03     |
| 6.9E-03     | 5.1E-03     | 9.4E-03     | 4.7E-03     | 7.4E-03     | 3.7E-03     | 5.5E-03     | 6.4E-03     | 6.5E-03     | 7.9E-03     | 7.5E-03     |
| 1.5E-01     | 8.2E-02     | 8.8E-02     | 1.2E-01     | 5.2E-02     | 3.7E-02     | 6.2E-02     | 6.8E-02     | 6.8E-02     | 1.2E-01     | 6.1E-02     |
| 1.4E-01     | 9.8E-02     | 1.1E-01     | 8.6E-02     | 8.0E-02     | 5.0E-02     | 4.8E-02     | 7.6E-02     | 7.6E-02     | 1.3E-01     | 6.2E-02     |
| 1.8E-01     | 8.0E-02     | 1.2E-01     | 7.0E-02     | 8.0E-02     | 5.9E-02     | 5.8E-02     | 5.6E-02     | 7.3E-02     | 8.1E-02     | 1.0E-01     |
| 2.0E+01     | 7.1E+00     | 0.0E+00     | 0.0E+00     | 3.2E+00     | 1.9E+01     | 0.0E+00     | 4.0E+00     | 2.3E+00     | 2.9E+00     | 0.0E+00     |
| 0           | 0           | 0           | 0           | 0           | 0           | 0           | 0           | 0           | 0           | 0           |
| 2           | 0           | 0           | 0           | 0           | 8           | 0           | 1           | 1           | 0           | 0           |
| 0           | 0           | 0           | 0           | 0           | 0           | 0           | 0           | 0           | 0           | 0           |
| 0           | 0           | 0           | 0           | 0           | 0           | 0           | 0           | 0           | 0           | 0           |
| 0           | 0           | 0           | 13          | 0           | 0           | 0           | 0           | 0           | 0           | 50          |
| 0           | 0           | 30          | 8           | 0           | 0           | 0           | 25          | 22          | 0           | 0           |
| 0           | 0           | 0           | 0           | 0           | 0           | 0           | 0           | 0           | 0           | 0           |
| 0           | 0           | 0           | 0           | 0           | 50          | 0           | 0           | 0           | 14          | 0           |
| 0           | 0           | 0           | 0           | 0           | 75          | 0           | 0           | 0           | 0           | 0           |
| 0           | 0           | 0           | 0           | 0           | 0           | 0           | 0           | 0           | 0           | 0           |
| 5           | 33          | 0           | 0           | 0           | 0           | 0           | 29          | 8           | 0           | 0           |
| 59          | 50          | 0           | 0           | 33          | 33          | 0           | 0           | 14          | 0           | 0           |
| 100         | 0           | 0           | 0           | 50          | 0           | 0           | 0           | 0           | 0           | 0           |
| 0           | 0           | 29          | 0           | 33          | 0           | 0           | 0           | 0           | 0           | 50          |
| 0           | 0           | 71          | 0           | 18          | 0           | 0           | 0           | 0           | 0           | 33          |
| 0           | 0           | 0           | 0           | 75          | 0           | 0           | 0           | 0           | 0           | 38          |
| 0           | 0           | 0           | 0           | 50          | 0           | 0           | 0           | 0           | 0           | 100         |
| 0           | 0           | 0           | 0           | 0           | 0           | 0           | 0           | 0           | 0           | 0           |
| 0           | 0           | 0           | 0           | 0           | 0           | 0           | 0           | 0           | 0           | 0           |
| 0           | 0           | 0           | 14          | 0           | 0           | 0           | 0           | 0           | 0           | 22          |
| 0           | 0           | 40          | 25          | 0           | 0           | 0           | 0           | 0           | 0           | 0           |
| 0           | 0           | 0           | 0           | 0           | 0           | 0           | 0           | 0           | 0           | 0           |
| 0           | 0           | 0           | 0           | 0           | 0           | 0           | 0           | 0           | 0           | 0           |
| 0           | 0           | 0           | 0           | 0           | 0           | 0           | 0           | 0           | 0           | 0           |
| 0           | 0           | 0           | 0           | 0           | 0           | 0           | 0           | 0           | 0           | 0           |
| 0           | 0           | 0           | 0           | 0           | 0           | 0           | 0           | 0           | 0           | 0           |
| 0           | 0           | 0           | 0           | 0           | 0           | 0           | 0           | 0           | 0           | 0           |
| 0           | 0           | 0           | 0           | 0           | 0           | 0           | 0           | 0           | 0           | 0           |
| 0           | 0           | 63          | 0           | 0           | 0           | 0           | 0           | 0           | 0           | 0           |
| 0           | 0           | 38          | 0           | 0           | 0           | 0           | 0           | 0           | 0           | 22          |
| 0           | 0           | 0           | 0           | 0           | 0           | 0           | 0           | 0           | 0           | 23          |
| 0           | 0           | 0           | 0           | 0           | 0           | 0           | 0           | 0           | 0           | 100         |
| 4           | 0           | 0           | 0           | 0           | 0           | 0           | 0           | 4           | 0           | 0           |
| 0           | 0           | 0           | 0           | 0           | 0           | 0           | 0           | 0           | 0           | 0           |
| 0           | 0           | 0           | 2           | 0           | 0           | 0           | 1           | 0           | 0           | 2           |
| 0           | 0           | 4           | 0           | 0           | 0           | 0           | 0           | 0           | 0           | 0           |
| 0           | 0           | 0           | 0           | 0           | 0           | 0           | 0           | 0           | 0           | 26          |
| 0           | 0           | 0           | 0           | 0           | 8           | 0           | 0           | 0           | 0           | 0           |
| 0           | 0           | 0           | 0           | 0           | 14          | 0           | 2           | 2           | 0           | 0           |
| 0           | 0           | 0           | 0           | 0           | 0           | 0           | 0           | 0           | 0           | 0           |
| 3           | 0           | 0           | 0           | 0           | 0           | 0           | 0           | 0           | 0           | 0           |
| 0           | 0           | 0           | 0           | 0           | 0           | 0           | 0           | 0           | 0           | 0           |
| 0           | 3           | 0           | 0           | 0           | 0           | 0           | 0           | 0           | 0           | 0           |
| 0           | 0           | 29          | 0           | 0           | 0           | 0           | 0           | 0           | 0           | 2           |
| 0           | 0           | 0           | 0           | 0           | 0           | 0           | 0           | 0           | 0           | 0           |
| 0           | 0           | 0           | 0           | 0           | 0           | 0           | 0           | 3           | 0           | 0           |
| 0           | 0           | 0           | 0           | 0           | 0           | 0           | 0           | 0           | 0           | 11          |
| 1.5E+00     | 9.7E-02     | 3.4E+00     | 5.1E-01     | 3.3E-01     | 2.7E-01     | 7.5E-02     | 2.0E+00     | 7.7E-01     | 1.1E-01     | 4.6E-01     |
| 8.0E-01     | 3.8E-01     | 4.5E-01     | 4.9E-01     | 1.3E-01     | 2.9E-01     | 5.3E-01     | 3.4E-01     | 3.5E-01     | 6.3E-01     | 5.6E-01     |
| 0           | 0           | 2           | 0           | 3           | 0           | 1           | 0           | 0           | 2           | 0           |
| 0.0E+00     | 0.0E+00     | -1.2E+00    | 0.0E+00     | -1.4E-01    | 0.0E+00     | 0.0E+00     | 0.0E+00     | 0.0E+00     | -7.4E-02    | 0.0E+00     |
| 0.0E+00     |

| Pseudo_Rare |
|-------------|-------------|-------------|-------------|-------------|-------------|-------------|-------------|-------------|-------------|-------------|
| Atpsg0141   | Atpsg0144   | Atpsg0150   | Atpsg0157   | Atpsg0160   | Atpsg0161   | Atpsg0162   | Atpsg0163   | Atpsg0166   | Atpsg0167   | Atpsg0169   |
| NA          |
| 1.2E-03     | 8.4E-03     | 1.1E-02     | 7.6E-03     | 3.4E-03     | 7.7E-03     | 4.0E-03     | 7.3E-03     | 3.9E-03     | 9.5E-03     | 3.9E-03     |
| 8.4E-06     | 5.4E-03     | 1.0E-02     | 8.7E-03     | 1.7E-03     | 5.0E-03     | 1.1E-02     | 2.1E-02     | 3.2E-03     | 5.8E-03     | 4.0E-03     |
| 8.8E-03     | 1.3E-02     | 9.1E-03     | 3.8E-03     | 5.5E-03     | 5.7E-03     | 7.6E-03     | 7.7E-03     | 5.2E-03     | 7.0E-03     | 1.3E-03     |
| 1.2E-02     | 1.1E-01     | 2.2E-01     | 1.3E-01     | 5.1E-02     | 6.5E-02     | 9.9E-02     | 1.0E-01     | 4.7E-02     | 1.0E-01     | 8.1E-02     |
| 1.8E-03     | 9.4E-02     | 2.3E-01     | 1.2E-01     | 3.5E-02     | 6.3E-02     | 1.6E-01     | 1.5E-01     | 5.0E-02     | 1.1E-01     | 6.8E-02     |
| 4.7E-02     | 1.3E-01     | 2.1E-01     | 9.7E-02     | 6.5E-02     | 6.7E-02     | 1.2E-01     | 1.0E-01     | 5.9E-02     | 9.7E-02     | 3.7E-02     |
| 8.8E+00     | 0.0E+00     | 4.4E+01     | 4.5E+01     | 0.0E+00     | 0.0E+00     | 3.5E+01     | 4.4E+00     | 0.0E+00     | 5.0E+01     | 3.2E+01     |
| 0           | 0           | 58          | 100         | 0           | 0           | 67          | 0           | 0           | 91          | 40          |
| 0           | 0           | 3           | 25          | 0           | 1           | 32          | 1           | 2           | 21          | 4           |
| 0           | 0           | 100         | 0           | 0           | 0           | 0           | 71          | 0           | 0           | 100         |
| 18          | 0           | 29          | 0           | 0           | 0           | 0           | 29          | 0           | 54          | 30          |
| 7           | 0           | 10          | 0           | 0           | 0           | 0           | 21          | 0           | 26          | 14          |
| 5           | 7           | 33          | 0           | 0           | 0           | 0           | 60          | 0           | 53          | 19          |
| 33          | 0           | 0           | 100         | 0           | 0           | 100         | 0           | 0           | 100         | 56          |
| 0           | 0           | 100         | 0           | 0           | 0           | 0           | 0           | 0           | 100         | 100         |
| 11          | 0           | 60          | 33          | 0           | 0           | 0           | 7           | 0           | 67          | 18          |
| 10          | 0           | 20          | 63          | 0           | 0           | 29          | 0           | 0           | 33          | 42          |
| 5           | 0           | 50          | 0           | 0           | 0           | 20          | 17          | 0           | 44          | 8           |
| 27          | 0           | 100         | 100         | 0           | 0           | 100         | 0           | 0           | 100         | 57          |
| 0           | 0           | 100         | 100         | 50          | 0           | 100         | 0           | 0           | 0           | 0           |
| 0           | 0           | 0           | 100         | 0           | 0           | 60          | 0           | 0           | 8           | 0           |
| 13          | 0           | 0           | 0           | 0           | 0           | 27          | 8           | 0           | 27          | 0           |
| 0           | 0           | 0           | 40          | 0           | 0           | 0           | 50          | 0           | 40          | 20          |
| 33          | 0           | 0           | 100         | 0           | 0           | 0           | 100         | 67          | 75          | 67          |
| 0           | 0           | 100         | 0           | 0           | 20          | 0           | 0           | 0           | 0           | 0           |
| 0           | 0           | 0           | 0           | 0           | 0           | 25          | 0           | 0           | 36          | 13          |
| 0           | 0           | 0           | 0           | 0           | 0           | 0           | 0           | 0           | 27          | 7           |
| 0           | 0           | 0           | 25          | 0           | 0           | 0           | 11          | 0           | 47          | 9           |
| 0           | 0           | 0           | 25          | 0           | 0           | 0           | 0           | 0           | 88          | 0           |
| 0           | 0           | 0           | 100         | 0           | 0           | 0           | 0           | 0           | 83          | 60          |
| 0           | 0           | 50          | 0           | 0           | 0           | 50          | 0           | 0           | 17          | 0           |
| 0           | 0           | 0           | 0           | 0           | 0           | 50          | 0           | 0           | 40          | 32          |
| 0           | 0           | 50          | 0           | 0           | 0           | 33          | 0           | 0           | 44          | 10          |
| 0           | 0           | 67          | 0           | 0           | 0           | 0           | 0           | 0           | 100         | 20          |
| 0           | 0           | 100         | 100         | 0           | 0           | 83          | 0           | 0           | 63          | 0           |
| 0           | 0           | 50          | 33          | 0           | 0           | 60          | 0           | 0           | 35          | 0           |
| 0           | 0           | 0           | 20          | 0           | 0           | 14          | 20          | 0           | 28          | 0           |
| 0           | 0           | 0           | 26          | 0           | 0           | 0           | 38          | 0           | 47          | 0           |
| 0           | 0           | 50          | 20          | 0           | 0           | 0           | 100         | 0           | 50          | 0           |
| 0           | 0           | 0           | 0           | 0           | 0           | 0           | 0           | 0           | 0           | 4           |
| 0           | 0           | 0           | 0           | 0           | 0           | 0           | 0           | 0           | 23          | 2           |
| 0           | 0           | 0           | 0           | 0           | 0           | 0           | 0           | 1           | 7           | 0           |
| 0           | 5           | 0           | 0           | 0           | 0           | 0           | 0           | 0           | 8           | 0           |
| 0           | 0           | 0           | 5           | 0           | 0           | 0           | 0           | 0           | 24          | 0           |
| 0           | 0           | 7           | 13          | 0           | 0           | 0           | 3           | 0           | 15          | 14          |
| 0           | 0           | 0           | 19          | 0           | 0           | 28          | 0           | 4           | 13          | 0           |
| 0           | 0           | 0           | 12          | 0           | 0           | 14          | 1           | 0           | 4           | 0           |
| 0           | 0           | 0           | 10          | 0           | 0           | 26          | 0           | 0           | 14          | 0           |
| 0           | 0           | 0           | 22          | 0           | 3           | 7           | 0           | 0           | 20          | 0           |
| 0           | 23          | 3           | 43          | 0           | 0           | 14          | 4           | 0           | 17          | 0           |
| 0           | 0           | 0           | 10          | 0           | 0           | 36          | 0           | 0           | 8           | 0           |
| 0           | 0           | 0           | 14          | 0           | 0           | 13          | 0           | 0           | 2           | 0           |
| 0           | 0           | 0           | 27          | 0           | 0           | 0           | 9           | 0           | 8           | 0           |
| 0           | 0           | 0           | 5           | 0           | 0           | 0           | 35          | 0           | 0           | 0           |
| 9.8E-01     | 2.2E-01     | 8.0E-01     | 5.2E-01     | 1.6E-01     | 3.7E-01     | 1.6E-01     | 2.7E+00     | 2.9E-01     | 1.2E-01     | 4.6E-01     |
| 4.0E-01     | 2.9E-01     | 3.3E-01     | 3.5E-01     | 7.5E-01     | 8.8E-01     | 2.7E-01     | 2.5E-01     | 2.9E-01     | 1.8E-01     | 2.0E-01     |
| 1           | 0           | 2           | 0           | 0           | 0           | 0           | 0           | 0           | 0           | 2           |
| 0.0E+00     | 0.0E+00     | -3.6E+00    | 0.0E+00     | 5.6E-01     |
| 0.0E+00     |



| Pseudo_Rare |
|-------------|-------------|-------------|-------------|-------------|-------------|-------------|
| Atpsg0170   | Atpsg0174   | Atpsg0179   | Atpsg0182   | Atpsg0183   | Atpsg0185   | Atpsg0187   |
| NA          |
| 8.1E-03     | 4.1E-03     | 9.6E-03     | 0.0E+00     | 0.0E+00     | 5.3E-03     | 9.7E-03     |
| 1.3E-02     | 8.4E-03     | 2.0E-02     | 0.0E+00     | 0.0E+00     | 2.4E-03     | 8.0E-03     |
| 8.6E-03     | 1.6E-02     | 1.3E-02     | 0.0E+00     | 0.0E+00     | 9.7E-03     | 9.2E-03     |
| 1.3E-01     | 7.2E-02     | 1.0E-01     | 0.0E+00     | 0.0E+00     | 4.1E-02     | 1.5E-01     |
| 1.5E-01     | 9.2E-02     | 1.1E-01     | 0.0E+00     | 0.0E+00     | 1.6E-02     | 9.8E-02     |
| 2.0E-01     | 1.9E-01     | 1.6E-01     | 0.0E+00     | 0.0E+00     | 4.4E-02     | 1.4E-01     |
| 5.0E+01     | 0.0E+00     | 0.0E+00     | 0.0E+00     | 0.0E+00     | 2.7E+00     | 0.0E+00     |
| 60          | 0           | 0           | 0           | 0           | 0           | 0           |
| 5           | 0           | 0           | 0           | 0           | 0           | 4           |
| 75          | 0           | 0           | 0           | 0           | 0           | 0           |
| 25          | 0           | 0           | 0           | 0           | 6           | 0           |
| 0           | 0           | 0           | 0           | 0           | 13          | 0           |
| 17          | 0           | 0           | 0           | 0           | 0           | 0           |
| 100         | 0           | 0           | 0           | 0           | 0           | 0           |
| 100         | 0           | 0           | 0           | 0           | 0           | 0           |
| 50          | 0           | 0           | 0           | 0           | 6           | 0           |
| 25          | 0           | 0           | 0           | 0           | 0           | 0           |
| 50          | 0           | 0           | 0           | 0           | 14          | 0           |
| 100         | 0           | 0           | 0           | 0           | 0           | 0           |
| 93          | 0           | 0           | 0           | 0           | 0           | 67          |
| 63          | 0           | 0           | 0           | 0           | 0           | 50          |
| 40          | 67          | 19          | 0           | 0           | 0           | 0           |
| 0           | 100         | 60          | 0           | 0           | 0           | 25          |
| 67          | 0           | 100         | 0           | 0           | 0           | 100         |
| 0           | 0           | 0           | 0           | 0           | 0           | 0           |
| 22          | 0           | 0           | 0           | 0           | 0           | 0           |
| 25          | 0           | 0           | 0           | 0           | 0           | 0           |
| 0           | 0           | 0           | 0           | 0           | 0           | 0           |
| 0           | 0           | 0           | 0           | 0           | 0           | 0           |
| 0           | 0           | 0           | 0           | 0           | 0           | 0           |
| 50          | 0           | 0           | 0           | 0           | 0           | 0           |
| 33          | 0           | 0           | 0           | 0           | 0           | 0           |
| 50          | 0           | 0           | 0           | 0           | 0           | 0           |
| 0           | 0           | 0           | 0           | 0           | 0           | 0           |
| 50          | 0           | 0           | 0           | 0           | 0           | 50          |
| 31          | 0           | 0           | 0           | 0           | 0           | 0           |
| 73          | 36          | 27          | 0           | 0           | 0           | 10          |
| 100         | 33          | 0           | 0           | 0           | 0           | 7           |
| 0           | 0           | 100         | 0           | 0           | 0           | 0           |
| 0           | 0           | 0           | 0           | 0           | 0           | 0           |
| 23          | 0           | 0           | 0           | 0           | 0           | 0           |
| 11          | 0           | 0           | 0           | 0           | 0           | 0           |
| 0           | 0           | 0           | 0           | 0           | 0           | 0           |
| 6           | 0           | 0           | 0           | 0           | 0           | 4           |
| 0           | 0           | 0           | 0           | 0           | 0           | 0           |
| 7           | 0           | 0           | 0           | 0           | 0           | 0           |
| 3           | 0           | 0           | 0           | 0           | 0           | 0           |
| 0           | 0           | 0           | 0           | 0           | 0           | 17          |
| 18          | 0           | 0           | 0           | 0           | 0           | 0           |
| 33          | 0           | 3           | 0           | 0           | 0           | 0           |
| 6           | 0           | 0           | 0           | 0           | 0           | 0           |
| 8           | 9           | 3           | 0           | 0           | 0           | 0           |
| 6           | 2           | 17          | 0           | 0           | 0           | 0           |
| 12          | 55          | 21          | 0           | 0           | 5           | 0           |
| 1.2E-01     | 2.0E-01     | 1.9E+00     | 0.0E+00     | 0.0E+00     | 5.0E-01     | 1.9E-01     |
| 4.3E-01     | 5.1E-01     | 1.4E+00     | 3.1E-01     | 3.1E-01     | 3.7E-01     | 3.3E-01     |
| 0           | 2           | 0           | 1           | 1           | 2           | 0           |
| 0.0E+00     | -6.2E-01    | 0.0E+00     | 0.0E+00     | 0.0E+00     | 6.0E-02     | 0.0E+00     |
| 0.0E+00     |

**Note:**

FBX\_ID was described in Hua *et al.* (*PLoS One* 2011 (6): e16219);  
The list of gene body (GB) methylated (bm) or non-methylated(-) *FBX* genes was retrieved from Takuno and Gaut (*Mol Biol Evol* 2012 (29):219-227);  
58 gene parameters are described in Fig. S5;
